# Supplementary material for: Aurkb/PP1-mediated resetting of Oct4 during the cell cycle determines the identity of embryonic stem cells
Source: eLife. 2016 Feb 15;5:e10877. doi: 10.7554/eLife.10877 (PMC4798952; doi:10.7554/eLife.10877)
Supplement: Figure 5—source data 1. — DOI: http://dx.doi.org/10.7554/eLife.10877.013 [file elife-10877-fig5-data1.xlsx]

## Sheet: Sheet1
1110059E24Rik
1700019A02Rik
1700019D03Rik
1700061G19Rik
1810022K09Rik
2300009A05Rik
2610044O15Rik8
2810474O19Rik
2900011O08Rik
3110007F17Rik
4930539E08Rik
5730508B09Rik
9030617O03Rik
9630033F20Rik
Abcb10
Abcg1
Abracl
Acaca
Acacb
Accsl
Acly
Acot1
Acot7
Acp5
Acsbg2
Actr2
Actr3b
Adam19
Adam23
Adamts14
Adap1
Adarb2
Adcy3
Adcyap1r1
Adk
Adnp2
Adrb3
Adsl
Aff3
Ago1
Agtrap
Ahcy
Ahsa1
Aipl1
Akap11
Akap12
Aldh1a2
Aldh1b1
Aldh3a1
Alpk3
Amhr2
Amt
Ank2
Ank3
Ankrd10
Ankrd29
Ankrd35
Anp32a
Anxa11
Anxa7
Ap3b2
Ap4s1
Api5
Apod
Aqp3
Aqr
Arglu1
Arhgap32
Arhgef28
Arl14epl
Arl4a
Armc10
Armcx1
Arntl
Arxes2
Asns
Ass1
Atcay
Atf7ip
Atg101
Atg14
Atp10a
Atp11b
Atp1b1
Atp5g3
Atp5s
Atp6v1c1
Atpif1
Atrx
Auh
Avpi1
AW551984
Azin2
B3glct
B3gnt2
B3gnt7
B4galnt3
B4galt6
Bag1
Bag4
Bai1
Bai3
Banf1
Bard1
Basp1
Bbs9
BC068157
Bcar3
Bcas1
Bcas2
Bclaf1
Bdnf
Bend3
Bend5
Bhlhb9
Blnk
Bnc2
Bnip3l
Bst2
Btf3
Bub1
Bub1b
Bub3
C1qtnf1
C330021F23Rik
C77370
Cacna1a
Cacna2d1
Cacng7
Cacybp
Calca
Calm2
Camk2b
Camk2n1
Capg
Capns1
Capsl
Capzb
Casp3
Cbfa2t2
Cbln4
Cbx7
Ccdc113
Ccdc12
Ccdc138
Ccdc141
Ccdc25
Ccdc60
Ccdc85a
Ccnc
Ccnd1
Ccnd2
Ccnjl
Ccno
Cd2
Cd2ap
Cd34
Cd37
Cd80
Cd9
Cdadc1
Cdc25a
Cdc42ep3
Cdca2
Cdca3
Cdca7
Cdh1
Cdh3
Cdk1
Cdk5r2
Cdk6
Cds1
Cdyl
Cdyl2
Cebpzos
Celf4
Cenpv
Cep55
Cep68
Cetn3
Cfap43
Chchd10
Chchd2
Chchd6
Chga
Chn1
Chst10
Chst15
Chsy1
Cisd1
Ckap4
Cldn4
Cldn9
Clns1a
Clta
Clvs2
Cmklr1
Cndp2
Cnga3
Cnpy1
Cobl
Coch
Col12a1
Col1a2
Col3a1
Commd10
Commd4
Commd9
Cops8
Coro1c
Coro2b
Cox6b2
Cox6c
Cox7a2l
Cox7c
Cplx1
Cpsf4l
Crabp1
Cradd
Crtac1
Cry1
Cse1l
Csn3
Csnk2a1
Cspg5
Csrp1
Csrp2
Cstf2t
Ctbp2
Ctgf
Cth
Cul4b
Cxcl12
Cxcl14
Cyp1b1
Cyyr1
D19Bwg1357e
D1Pas1
D630039A03Rik
D930015E06Rik
Dad1
Dcbld1
Dclk2
Ddc
Ddit4
Ddit4l
Ddx18
Ddx3x
Ddx58
Def8
Dennd2c
Deptor
Dfna5
Dgkh
Dhrs7
Dhx40
Dhx8
Diap1
Diap2
Diap3
Dido1
Dis3l2
Dlc1
Dlgap1
Dlgap3
Dll1
Dmd
Dmtn
Dnaja2
Dnajb6
Dnajc15
Dnajc6
Dnase2a
Dnd1
Dner
Dnmt3a
Dnmt3l
Dock2
Dock5
Dock6
Dpp4
Dpp6
Dppa2
Dppa3
Dppa4
Dppa5a
Dpysl2
Dpysl3
Dtna
Dusp1
Dusp6
Dyrk3
E130012A19Rik
E130309D14Rik
E2f8
Ebf1
Ect2
Eed
Efcab2
Egfl6
Egln3
Ei24
Eif2s3x
Eif3d
Eif3e
Eif3m
Eif4e2
Elmo1
Elovl6
Emb
Emc10
Eml4
Emp1
Enah
Enc1
Eno1
Enox1
Enpp2
Enpp3
Epas1
Epb4.1l5
Epcam
Epha1
Epha2
Ephx2
Eps8
Eras
Erf
Ergic1
Erh
Esrrb
Etaa1
Etl4
Etnk1
Etv4
Etv5
Extl3
Ezh2
Ezr
F2rl1
Fam110c
Fam129b
Fam159a
Fam162a
Fam167a
Fam169a
Fam196b
Fam19a4
Fam208a
Fam49b
Fam60a
Fam78a
Fam84b
Fam92a
Fam98a
Fancc
Fancl
Fasn
Fat2
Fblim1
Fbp1
Fbxl17
Fbxo15
Fbxo22
Fbxo42
Fgd1
Fgd2
Fgf10
Fgf13
Fgf15
Fgf3
Fgf4
Fgfr3
Fgg
Fggy
Fgr
Fhod3
Flywch2
Fmn2
Fmr1
Fn1
Fnta
Foxd3
Foxi3
Foxn4
Foxp1
Foxp4
Frat2
Frmd4a
Frrs1
Fst
Ftl1
Fto
Fubp1
Fubp3
Fut9
Fxr1
Fzd10
Fzd2
Fzd5
Fzd7
Gabrb3
Gabrp
Gadd45a
Galm
Galnt9
Gap43
Gbx2
Gdf3
Gemin6
Gfod1
Gfpt2
Ggact
Ggps1
Gja1
Gjb1
Gjb4
Gjc1
Gldc
Glod5
Glrx5
Glt1d1
Gltscr1l
Glud1
Glul
Glyatl3
Gm13251
Gm14393
Gm5617
Gm7325
Gna14
Gnb2l1
Gnpnat1
Gpa33
Gpc3
Gpd2
Gpn1
Gpr135
Gpr20
Gpt2
Grhl2
Grhpr
Grm4
Gsta3
Gsta4
Gtf2e2
Gtf2f2
Gtf3c3
Gtpbp4
Gucy2g
H2afx
H2afy
H2afz
H2-M5
Hal
Hapln3
Has2
Haus1
Hbegf
Hck
Hdac1
Hdac2
Heatr2
Helb
Herc4
Hexb
Hexim1
Hist1h3c
Hk2
Hmces
Hmgcr
Hmgn2
Hmgn5
Hmgxb4
Hnrnpd
Hnrnph2
Hopx
Hs6st2
Hsd17b11
Hsd17b14
Hsf2
Hspa4
Hspa8
Hspb8
Hspbap1
Hspe1
Hsph1
Htatip2
Huwe1
Hydin
Ier2
Ier3
Ifitm1
Ifitm2
Ift52
Igf2bp2
Igfbp2
Igfbp7
Igsf10
Il17d
Il17rd
Il6st
Inhbb
Inpp5d
Insc
Insm1
Ints6
Ints7
Ipmk
Ipo11
Iqgap1
Irak3
Islr2
Itgam
Itpk1
Itpka
Izumo2
Jag1
Jakmip1
Jam2
Jarid2
Kank2
Kat2b
Kat7
Kcnb1
Kcnk3
Kcnk5
Kcnq2
Kcnt2
Kdelr3
Kdm1a
Kdm3a
Kdm3b
Kdm4c
Kdm5b
Khdc3
Khdrbs1
Kif11
Kif13b
Kif18a
Kif20b
Kif2c
Kif5a
Klf13
Klf2
Klf4
Klf5
Klf8
Klf9
Klhl21
Klhl34
Kndc1
Kras
Krr1
Krt9
Kti12
Ky
L1td1
Lace1
Lama3
Lap3
Las1l
Ldb1
Ldhd
Ldlrad4
Lef1
Lefty1
Lefty2
Lfng
Lgals9
Lgr4
Lima1
Lin28a
Liph
Lmnb1
Lmtk2
Lonrf2
Lpar4
Lpar6
Lpin1
Lrch1
Lrch2
Lrp11
Lrpap1
Lrpprc
Lrrc15
Lrrc2
Lrrc34
Lsm5
Lsm6
Ltbp1
Ltbp4
Lurap1l
Ly6g6d
Lyrm4
Lyrm7
M1ap
Mad2l1
Mafa
Mageb16
Magoh
Malt1
Maml2
Manba
Manbal
Map10
Map2k1
Map4k3
Map4k4
Mapk13
Mark1
Mat2b
Matn3
Mb
Mbtd1
Mbtps2
Mcam
Mcf2
Mcf2l
Mcl1
Mcm6
Mdfi
Mdh2
Meiob
Mep1b
Mettl20
Mettl25
Mex3c
Mfap1b
Mfi2
Mgat4e
Mgmt
Mia
Mical1
Mid1ip1
Mif
Mipep
Mkrn1
Mmp2
Mmp25
Mms22l
Mobp
Mocos
Mok
Morc1
Morf4l1
Mov10
Mplkip
Mreg
Mrfap1
Mrpl16
Mrpl33
Mrpl36
Mrpl51
Mrps24
Msantd2
Msh2
Msh6
Msi1
Msi2
Msl3l2
Msln
Msra
Msrb2
Mt2
Mta1
Mta3
Mtch2
Mterf1a
Mthfd1l
Mtmr14
Mtmr7
Murc
Mxi1
Myb
Mybl2
Mycl
Mycn
Myh13
Myl9
Myo10
Myrf
Naa11
Naa20
Naa30
Nacc1
Naf1
Nampt
Nanog
Nanp
Nap1l1
Nap1l3
Naprt
Ncam1
Nccrp1
Ndn
Ndnl2
Ndrg4
Ndufa10
Ndufb5
Ndufs4
Nedd4
Nes
Neurod1
Nf2
Nfasc
Nfatc2ip
Nfatc4
Nfkb1
Nfkbia
Nfu1
Ngf
Ngfr
Nhsl2
Nkx6-3
Nme7
Nmnat2
Nnmt
Nod1
Nodal
Nolc1
Notch3
Notch4
Npm1
Nptx2
Nr0b1
Nr5a2
Nrf1
Nrp2
Nrsn1
Nsg2
Nsun2
Nt5e
Ntn1
Nubpl
Nucks1
Nudt21
Nufip1
Numbl
Nup107
Nxn
Oacyl
Olig2
Osgep
Ostf1
Otx2
Ovol2
Oxsr1
P4ha1
Pak1
Pald1
Parp1
Parp12
Parp14
Patz1
Pax6
Pax8
Pbk
Pcsk9
Pcyt1b
Pdcd7
Pdgfc
Pdhb
Pdk1
Pdk4
Pdlim1
Pdpn
Pdyn
Pdzd4
Pdzk1
Pecam1
Pecr
Peg12
Pfkp
Pga5
Pgc
Pgm2
Pgrmc1
Pgrmc2
Phactr3
Phc1
Phf19
Phf8
Phyhipl
Pif1
Pigyl
Pik3c3
Pim1
Pim2
Pipox
Pirt
Pitpnb
Pitpnc1
Pitrm1
Pitx2
Piwil4
Pkdcc
Pkm
Pknox1
Pla1a
Pla2g10
Pla2g4a
Plagl1
Plce1
Plcg2
Plch1
Plcxd1
Plekhf2
Pls3
Pltp
Pmaip1
Pml
Pnp
Pnp2
Pole4
Polr3b
Polr3gl
Polr3k
Pomp
Porcn
Postn
Pou2f1
Pou2f3
Pou4f2
Pou5f1
Ppa1
Ppef2
Ppm1a
Ppp1cb
Ppp1r14a
Ppp1r1a
Ppp2r2d
Pqlc1
Prdm1
Prdm14
Prdm16
Prdm5
Prelid2
Prkd3
Prmt3
Prmt8
Prom1
Prps1
Prune2
Psat1
Psma6
Psmb7
Psmc1
Psmd1
Psmd14
Psmd7
Psme4
Psmg4
Pstpip1
Ptbp2
Ptch1
Ptch2
Ptgfrn
Ptgis
Ptk2b
Ptma
Ptp4a3
Ptprk
Ptprt
Ptrh2
Pura
Pvrl2
Qpct
R3hcc1
Rab1
Rab27a
Rab4a
Rabif
Rad18
Radil
Ralb
Ralgps2
Ran
Rangap1
Rap1gap
Rap2b
Rapgef5
Rarg
Rasd2
Rassf2
Rbfa
Rbfox2
Rbfox3
Rbm10
Rbm14
Rbmxl1
Rbmxl2
Rbpms2
Rbx1
Rcc2
Rcor2
Reep2
Rest
Rfc1
Rfc5
Rfx2
Rfx4
Rgcc
Rgs16
Rgs20
Rif1
Rims4
Ripply1
Rmnd5b
Rnaseh1
Rnaseh2b
Rnd3
Rnf10
Rnf125
Rnf144a
Rnf165
Rnf220
Rnmtl1
Rpap1
Rpap3
Rpe
Rpl10l
Rpl11
Rpl38
Rpl7l1
Rplp1
Rpp14
Rps13
Rps14
Rps20
Rps24
Rps26
Rps27a
Rps3a1
Rps6ka1
Rps6ka2
Rps6kl1
Rragb
Rras2
Rrm1
Rrm2
Rrn3
Rrp1
Rrs1
Rsl24d1
Rsph1
Rtf1
Rtkn2
Rtn4
Runx1t1
Ruvbl1
Sae1
Sall1
Sall3
Sall4
Samm50
Sap30
Sars
Scd2
Schip1
Scn3a
Scp2
Sdf2
Sec11a
Sec16a
Sec61b
Sec61g
Sema3e
Sema5b
Sema6a
Sept11
Serbp1
Serpini1
Sestd1
Set
Setmar
Setx
Sf3b5
Sfpq
Sfrp1
Sfrp4
Sgk1
Sgol2
Sh3gl2
Shcbp1
Shisa2
Shisa3
Shq1
Siah1a
Siah1b
Siglecf
Sirt1
Skil
Slc15a1
Slc17a9
Slc25a1
Slc25a13
Slc25a36
Slc25a40
Slc25a5
Slc27a2
Slc28a1
Slc29a4
Slc35f2
Slc37a1
Slc38a2
Slc39a14
Slc43a1
Slc45a1
Slc47a1
Slc4a7
Slc52a3
Slc5a1
Slc5a11
Slc6a1
Slc6a15
Slc6a6
Slc7a3
Slc7a7
Slc7a9
Slco4a1
Slitrk5
Slmo1
Smagp
Smarca5
Smarcad1
Smarcd2
Smim12
Smpdl3b
Sms
Smtn
Smtnl2
Smu1
Snap25
Snrpa
Snrpn
Sntb1
Snx11
Snx18
Soat1
Socs2
Sort1
Sox13
Sox2
Sox3
Sox7
Spag16
Spata13
Spink3
Spock2
Spon1
Spp1
Spred1
Spry2
Spry4
Sqle
Srbd1
Srgn
Srrt
Srsf1
Srsf3
Srsf6
Srsf9
Ss18
Ssr2
Stac2
Stag2
Stat4
Stk17b
Stmn2
Stoml1
Strn
Stx3
Sub1
Sugt1
Sulf1
Sumo1
Sumo3
Susd5
Suz12
Svil
Syf2
Syncrip
Syndig1
Synj2
Syt9
Tacc2
Taf15
Taf5l
Tagln3
Tamm41
Tarm1
Tbc1d13
Tbc1d9
Tcea1
Tcea3
Tcerg1l
Tcf15
Tcl1
Tdh
Tdp2
Tdrd12
Tdrp
Tefm
Tek
Terf1
Tet2
Tex14
Tex21
Tfap2c
Tfcp2l1
Tfe3
Tfpi
Tgif1
Tgif2
Tgm1
Thada
Thbs1
Thrsp
Thumpd3
Tiam2
Ticrr
Timp1
Tiparp
Tjp2
Tkt
Tle4
Tmeff1
Tmem11
Tmem167
Tmem216
Tmem28
Tmem40
Tmem60
Tmprss11d
Tmprss12
Tnc
Tnfaip8
Tnfsf11
Tnpo3
Tomm34
Tomm5
Top1
Tor3a
Trappc6a
Trappc9
Trh
Trib1
Trim12a
Trim13
Trim2
Trim24
Trim33
Tro
Trp53
Trp53i11
Trp73
Trps1
Tsc22d1
Tspan5
Tspan6
Tspyl1
Tspyl2
Tspyl4
Tsr2
Tssc1
Ttc27
Ttc29
Ttc30a1
Ttc30b
Ttc32
Ttc39b
Ttc39c
Ttc5
Ttn
Ttpa
Tubb2b
Twf2
Txlng
Txnl1
Uba2
Ube2e1
Ube2k
Ube2s
Ube2v2
Ubr5
Ubr7
Ubtf
Ubxn10
Ucp2
Ugdh
Ulk1
Upp1
Uqcr10
Uqcrb
Uqcrh
Urb2
Uri1
Urm1
Urod
Usp11
Usp28
Usp7
Usp9x
Utf1
Utp18
Vdac1
Vegfc
Vrk1
Vrtn
Vstm2l
Vta1
Vwa8
Vwf
Wdr1
Wdr76
Wdr82
Wdr89
Wnt5a
Wnt8a
Wscd1
Wwc1
Xaf1
Xkr6
Xrcc2
Xrcc5
Xrn2
Ybx1
Ybx3
Ywhag
Ywhah
Ywhaq
Zap70
Zbp1
Zbtb7a
Zbtb8a
Zc3h12a
Zc3h13
Zfml
Zfp273
Zfp36l2
Zfp428
Zfp518a
Zfp518b
Zfp532
Zfp536
Zfp652
Zfp808
Zfp819
Zfp958
Zic2
Zic3
Zmat4
Zrsr1
Zscan10
Zswim1
Zwint
Zyg11b
