# Supplementary material for: Aurkb/PP1-mediated resetting of Oct4 during the cell cycle determines the identity of embryonic stem cells
Source: eLife. 2016 Feb 15;5:e10877. doi: 10.7554/eLife.10877 (PMC4798952; doi:10.7554/eLife.10877)
Supplement: Figure 5—source data 2. — DOI: http://dx.doi.org/10.7554/eLife.10877.014 [file elife-10877-fig5-data2.xlsx]

## Sheet: Sheet1
chrom	start	end	Oct4(ChIP-seq reads per million value)	proximal_gene	Gene symbol
chr3	133181431	133197648	11767.1	NM_001040400	TET2
chr2	51926608	51928267	10965.3	NM_175238	RIF1
chr17	53690666	53701713	9954.45	NM_020005	KAT2B
chr11	62324296	62327251	8217.26	NM_028448	CENPV
chr19	42210160	42211146	4938.18	NM_027106	AVPI1
chr1	15779114	15782330	4612.39	NM_009352	TERF1
chr2	127664828	127665772	4563.86	NM_009772	BUB1
chr6	67061148	67064202	4287.51	NM_007836	GADD45A
chr3	30988014	30988781	4122.09	NM_011386	SKIL
chr4	142891686	142896659	4086.31	NM_010329	PDPN
chr17	26631721	26648689	3958.63	NM_013642	DUSP1
chr6	65746069	65747874	3896.63	NM_027547	PRDM5
chr17	31400783	31404494	3684.65	NM_025290	RSPH1
chr18	77995875	77996771	3673.78	NM_146089	HAUS1
chr10	20850436	20851316	3514.02	NM_010848	MYB
chr17	29604381	29613948	3204.95	NM_008842	PIM1
chr19	38138264	38139095	3145.34	NM_001164362	CEP55
chr5	141087076	141088486	3031.08	NM_008494	LFNG
chr9	44141293	44142111	3019.48	NM_010436	H2AFX
chr2	121095895	121096949	2975.55	NM_013735	TRP53
chr9	14484608	14486412	2936.01	NM_177905	PIWIL4
chr7	138847593	138852757	2851.04	NM_009774	BUB3
chr17	28921725	28922477	2701.03	NM_011950	MAPK13
chrX	12623919	12624670	2390.96	NM_009481	USP9X
chr8	89299121	89300021	2222.55	NM_009172	SIAH1A
chr19	37474940	37476009	2196.9	NM_010615	KIF11
chr17	87870697	87871690	2166.83	NM_007589	CALM2
chr14	26660282	26660905	2141.38	NM_013469	ANXA11
chr19	35175619	35176314	2089.52	NM_183046	KIF20B
chr17	7409196	7411646	1994.79	NM_011299	RPS6KA2
chr4	153469755	153470645	1942.69	NM_001126331	TRP73
chr5	3293533	3294170	1898.13	NM_009873	CDK6
chr2	109214985	109215468	1709.72	NM_139303	KIF18A
chr10	68822255	68822910	1551.17	NM_007659	CDK1
chr2	118413162	118414171	1541.25	NM_009773	BUB1B
chr4	140249934	140251467	1521.35	NM_173867	RCC2
chr11	5938677	5939733	1438.69	NM_001174053	CAMK2B
chr9	64114898	64115556	1211.05	NM_008927	MAP2K1
chr1	58045669	58046468	1197.94	NM_001177867	SGOL2
chr17	88076955	88077637	1140.85	NM_008628	MSH2
chr2	131870155	131870777	1115.81	NM_175445	RASSF2
chr11	33079703	33080456	1085.6	NM_008722	NPM1
chr4	129427470	129428279	1066.59	NM_011317	KHDRBS1
chr6	66407998	66408726	948.73	NM_019499	MAD2L1
chr7	137743793	137744554	902.546	NM_206856	TACC2
chr9	58089240	58090163	882.85	NM_008884	PML
chr17	43037616	43038420	821.125	NM_009847	CD2AP
chr12	81728249	81728905	788.25	NM_007951	ERH
chr1	130240870	130241313	691.922	NM_008567	MCM6
chr6	124781521	124782304	663.044	NM_013538	CDCA3
chr7	56173262	56173996	626.175	NM_001013368	E2F8
chr7	152220158	152220775	560.359	NM_007631	CCND1
chr5	32739905	32740870	557.577	NM_172707	PPP1CB
chr9	109774888	109775365	552.748	NM_007658	CDC25A
chr13	82088060	82088507	508.015	NM_007684	CETN3
chrX	148740586	148741253	453.96	NM_029836	TSPYL2
chr6	88432824	88433647	420.635	NM_019685	RUVBL1
chr6	127199939	127200552	412.181	NM_009829	CCND2
chrX	39512694	39513371	390.629	NM_021465	STAG2
chr10	72502206	72502865	365.613	NM_025635	ZWINT
chr12	4161793	4162299	299.451	NM_138305	ADCY3
chr5	129535006	129535503	240.299	NM_009391	RAN
chr14	68155746	68156330	232.49	NM_001110162	CDCA2
chr1	176514128	176514572	200.732	NM_019445	FMN2
