# Supplementary material for: Aurkb/PP1-mediated resetting of Oct4 during the cell cycle determines the identity of embryonic stem cells
Source: eLife. 2016 Feb 15;5:e10877. doi: 10.7554/eLife.10877 (PMC4798952; doi:10.7554/eLife.10877)
Supplement: Figure 6—source data 1. — DOI: http://dx.doi.org/10.7554/eLife.10877.016 [file elife-10877-fig6-data1.xlsx]

## Sheet: G2M only
#name	chr	start	end	strand
Merged-chr14-16651325-1	chr14	16651225	16651425	+
Merged-chr14-16871073-1	chr14	16870973	16871173	+
Merged-chr14-18073283-1	chr14	18073183	18073383	+
Merged-chr14-18978280-1	chr14	18978180	18978380	+
Merged-chr14-18978845-1	chr14	18978745	18978945	+
Merged-chr14-19088788-1	chr14	19088688	19088888	+
Merged-chr10-82808998-1	chr10	82808898	82809098	+
Merged-chr10-83002531-1	chr10	83002431	83002631	+
Merged-chr14-20346492-1	chr14	20346392	20346592	+
Merged-chr14-20596265-1	chr14	20596165	20596365	+
Merged-chr14-20604308-1	chr14	20604208	20604408	+
Merged-chr14-20679884-1	chr14	20679784	20679984	+
Merged-chr10-85235855-1	chr10	85235755	85235955	+
Merged-chr10-86906602-1	chr10	86906502	86906702	+
Merged-chr10-88120641-1	chr10	88120541	88120741	+
Merged-chr14-20680529-1	chr14	20680429	20680629	+
Merged-chr14-20697867-1	chr14	20697767	20697967	+
Merged-chr14-21455606-1	chr14	21455506	21455706	+
Merged-chr14-21915903-1	chr14	21915803	21916003	+
Merged-chr10-89203824-1	chr10	89203724	89203924	+
Merged-chr10-89454308-1	chr10	89454208	89454408	+
Merged-chr10-90234664-1	chr10	90234564	90234764	+
Merged-chr14-23794653-1	chr14	23794553	23794753	+
Merged-chr14-24220305-1	chr14	24220205	24220405	+
Merged-chr14-24971341-1	chr14	24971241	24971441	+
Merged-chr14-25202863-1	chr14	25202763	25202963	+
Merged-chr10-90881489-1	chr10	90881389	90881589	+
Merged-chr10-92978398-1	chr10	92978298	92978498	+
Merged-chr14-26470949-1	chr14	26470849	26471049	+
Merged-chr14-26629588-1	chr14	26629488	26629688	+
Merged-chr14-27308426-1	chr14	27308326	27308526	+
Merged-chr10-93830815-1	chr10	93830715	93830915	+
Merged-chr10-93866736-1	chr10	93866636	93866836	+
Merged-chr14-28266377-1	chr14	28266277	28266477	+
Merged-chr14-28332741-1	chr14	28332641	28332841	+
Merged-chr14-30608744-1	chr14	30608644	30608844	+
Merged-chr14-32313055-1	chr14	32312955	32313155	+
Merged-chr10-94843259-1	chr10	94843159	94843359	+
Merged-chr14-33212457-1	chr14	33212357	33212557	+
Merged-chr14-33326477-1	chr14	33326377	33326577	+
Merged-chr14-35173294-1	chr14	35173194	35173394	+
Merged-chr14-35185955-1	chr14	35185855	35186055	+
Merged-chr10-96790821-1	chr10	96790721	96790921	+
Merged-chr10-96926866-1	chr10	96926766	96926966	+
Merged-chr10-98561254-1	chr10	98561154	98561354	+
Merged-chr10-98979950-1	chr10	98979850	98980050	+
Merged-chr14-35984070-1	chr14	35983970	35984170	+
Merged-chr14-36619270-1	chr14	36619170	36619370	+
Merged-chr14-37012304-1	chr14	37012204	37012404	+
Merged-chr10-102837917-1	chr10	102837817	102838017	+
Merged-chr10-103999291-1	chr10	103999191	103999391	+
Merged-chr10-104014135-1	chr10	104014035	104014235	+
Merged-chr10-104278041-1	chr10	104277941	104278141	+
Merged-chr14-39450598-1	chr14	39450498	39450698	+
Merged-chr14-41705743-1	chr14	41705643	41705843	+
Merged-chr14-42195590-1	chr14	42195490	42195690	+
Merged-chr10-107736408-1	chr10	107736308	107736508	+
Merged-chr14-42517317-1	chr14	42517217	42517417	+
Merged-chr14-43232874-1	chr14	43232774	43232974	+
Merged-chr14-43646209-1	chr14	43646109	43646309	+
Merged-chr14-43749962-1	chr14	43749862	43750062	+
Merged-chr14-44077283-1	chr14	44077183	44077383	+
Merged-chr10-108752549-1	chr10	108752449	108752649	+
Merged-chr10-109894232-1	chr10	109894132	109894332	+
Merged-chrX-120957827-1	chrX	120957727	120957927	+
Merged-chrX-120959068-1	chrX	120958968	120959168	+
Merged-chrX-121064955-1	chrX	121064855	121065055	+
Merged-chrX-122961497-1	chrX	122961397	122961597	+
Merged-chrX-123082871-1	chrX	123082771	123082971	+
Merged-chrX-123195903-1	chrX	123195803	123196003	+
Merged-chrX-123700513-1	chrX	123700413	123700613	+
Merged-chrX-125262074-1	chrX	125261974	125262174	+
Merged-chrX-125591153-1	chrX	125591053	125591253	+
Merged-chrX-126510120-1	chrX	126510020	126510220	+
Merged-chrX-131208092-1	chrX	131207992	131208192	+
Merged-chrX-133033700-1	chrX	133033600	133033800	+
Merged-chrX-134498910-1	chrX	134498810	134499010	+
Merged-chrX-139615034-1	chrX	139614934	139615134	+
Merged-chrX-142337091-1	chrX	142336991	142337191	+
Merged-chrX-149335648-1	chrX	149335548	149335748	+
Merged-chrX-149336168-1	chrX	149336068	149336268	+
Merged-chrX-151256587-1	chrX	151256487	151256687	+
Merged-chrX-152290373-1	chrX	152290273	152290473	+
Merged-chrX-152753292-1	chrX	152753192	152753392	+
Merged-chrX-156411749-1	chrX	156411649	156411849	+
Merged-chrX-158758540-1	chrX	158758440	158758640	+
Merged-chrX-166425055-1	chrX	166424955	166425155	+
Merged-chrX-166426338-1	chrX	166426238	166426438	+
Merged-chrX_random-418093-1	chrX_random	417993	418193	+
Merged-chrX_random-466329-1	chrX_random	466229	466429	+
Merged-chrX_random-585031-1	chrX_random	584931	585131	+
Merged-chrX_random-1783786-1	chrX_random	1783686	1783886	+
Merged-chrY-1568597-1	chrY	1568497	1568697	+
Merged-chrY-1659793-1	chrY	1659693	1659893	+
Merged-chrY_random-5637686-1	chrY_random	5637586	5637786	+
Merged-chrY_random-7891903-1	chrY_random	7891803	7892003	+
Merged-chrY_random-10689468-1	chrY_random	10689368	10689568	+
Merged-chrY_random-11281660-1	chrY_random	11281560	11281760	+
Merged-chrY_random-11923722-1	chrY_random	11923622	11923822	+
Merged-chrY_random-16409375-1	chrY_random	16409275	16409475	+
Merged-chrY_random-18953838-1	chrY_random	18953738	18953938	+
Merged-chrY_random-20811961-1	chrY_random	20811861	20812061	+
Merged-chrY_random-34295464-1	chrY_random	34295364	34295564	+
Merged-chrY_random-34297308-1	chrY_random	34297208	34297408	+
Merged-chrY_random-37564929-1	chrY_random	37564829	37565029	+
Merged-chrY_random-42839326-1	chrY_random	42839226	42839426	+
Merged-chrY_random-45427163-1	chrY_random	45427063	45427263	+
Merged-chr5-113331984-1	chr5	113331884	113332084	+
Merged-chr2-155581663-1	chr2	155581563	155581763	+
Merged-chr2-155772218-1	chr2	155772118	155772318	+
Merged-chr2-156251532-1	chr2	156251432	156251632	+
Merged-chr2-156588511-1	chr2	156588411	156588611	+
Merged-chr2-156677731-1	chr2	156677631	156677831	+
Merged-chr5-115915000-1	chr5	115914900	115915100	+
Merged-chr5-115940102-1	chr5	115940002	115940202	+
Merged-chr2-157312488-1	chr2	157312388	157312588	+
Merged-chr2-157415042-1	chr2	157414942	157415142	+
Merged-chr2-157449765-1	chr2	157449665	157449865	+
Merged-chr2-157979622-1	chr2	157979522	157979722	+
Merged-chr5-117455925-1	chr5	117455825	117456025	+
Merged-chr5-118882883-1	chr5	118882783	118882983	+
Merged-chr2-158439371-1	chr2	158439271	158439471	+
Merged-chr2-159520082-1	chr2	159519982	159520182	+
Merged-chr2-160458253-1	chr2	160458153	160458353	+
Merged-chr2-160458814-1	chr2	160458714	160458914	+
Merged-chr5-120590145-1	chr5	120590045	120590245	+
Merged-chr5-121157237-1	chr5	121157137	121157337	+
Merged-chr2-162857647-1	chr2	162857547	162857747	+
Merged-chr2-163116122-1	chr2	163116022	163116222	+
Merged-chr2-163143128-1	chr2	163143028	163143228	+
Merged-chr5-122051289-1	chr5	122051189	122051389	+
Merged-chr5-122872270-1	chr5	122872170	122872370	+
Merged-chr5-123176179-1	chr5	123176079	123176279	+
Merged-chr5-123440355-1	chr5	123440255	123440455	+
Merged-chr2-164098034-1	chr2	164097934	164098134	+
Merged-chr2-164596370-1	chr2	164596270	164596470	+
Merged-chr2-165720097-1	chr2	165719997	165720197	+
Merged-chr2-165986697-1	chr2	165986597	165986797	+
Merged-chr5-125873459-1	chr5	125873359	125873559	+
Merged-chr5-126530682-1	chr5	126530582	126530782	+
Merged-chr5-126698283-1	chr5	126698183	126698383	+
Merged-chr5-127250154-1	chr5	127250054	127250254	+
Merged-chr5-127300321-1	chr5	127300221	127300421	+
Merged-chr2-166620191-1	chr2	166620091	166620291	+
Merged-chr5-127442754-1	chr5	127442654	127442854	+
Merged-chr5-128362519-1	chr5	128362419	128362619	+
Merged-chr5-129099469-1	chr5	129099369	129099569	+
Merged-chr5-129661287-1	chr5	129661187	129661387	+
Merged-chr2-167506891-1	chr2	167506791	167506991	+
Merged-chr2-167885042-1	chr2	167884942	167885142	+
Merged-chr2-167982875-1	chr2	167982775	167982975	+
Merged-chr5-129943874-1	chr5	129943774	129943974	+
Merged-chr5-130153853-1	chr5	130153753	130153953	+
Merged-chr5-130364145-1	chr5	130364045	130364245	+
Merged-chr5-131929132-1	chr5	131929032	131929232	+
Merged-chr2-168806283-1	chr2	168806183	168806383	+
Merged-chr2-168822789-1	chr2	168822689	168822889	+
Merged-chr2-168850965-1	chr2	168850865	168851065	+
Merged-chr2-169721335-1	chr2	169721235	169721435	+
Merged-chr5-131990372-1	chr5	131990272	131990472	+
Merged-chr5-133387996-1	chr5	133387896	133388096	+
Merged-chr5-133576236-1	chr5	133576136	133576336	+
Merged-chr2-170704544-1	chr2	170704444	170704644	+
Merged-chr14-44290776-1	chr14	44290676	44290876	+
Merged-chr14-44872849-1	chr14	44872749	44872949	+
Merged-chr14-45353141-1	chr14	45353041	45353241	+
Merged-chr14-46347908-1	chr14	46347808	46348008	+
Merged-chr10-114465879-1	chr10	114465779	114465979	+
Merged-chr14-50222095-1	chr14	50221995	50222195	+
Merged-chr14-50227193-1	chr14	50227093	50227293	+
Merged-chr10-115999456-1	chr10	115999356	115999556	+
Merged-chr14-50228351-1	chr14	50228251	50228451	+
Merged-chr14-50713638-1	chr14	50713538	50713738	+
Merged-chr14-50741067-1	chr14	50740967	50741167	+
Merged-chr10-118681803-1	chr10	118681703	118681903	+
Merged-chr10-119052489-1	chr10	119052389	119052589	+
Merged-chr10-119104776-1	chr10	119104676	119104876	+
Merged-chr14-52672590-1	chr14	52672490	52672690	+
Merged-chr14-52673218-1	chr14	52673118	52673318	+
Merged-chr14-53384327-1	chr14	53384227	53384427	+
Merged-chr14-53632534-1	chr14	53632434	53632634	+
Merged-chr10-119694921-1	chr10	119694821	119695021	+
Merged-chr10-120857443-1	chr10	120857343	120857543	+
Merged-chr14-54098425-1	chr14	54098325	54098525	+
Merged-chr14-54937859-1	chr14	54937759	54937959	+
Merged-chr14-56248349-1	chr14	56248249	56248449	+
Merged-chr14-56328554-1	chr14	56328454	56328654	+
Merged-chr14-56487625-1	chr14	56487525	56487725	+
Merged-chr10-126998522-1	chr10	126998422	126998622	+
Merged-chr10-127959681-1	chr10	127959581	127959781	+
Merged-chr10-127984887-1	chr10	127984787	127984987	+
Merged-chr14-61299539-1	chr14	61299439	61299639	+
Merged-chr10-128315780-1	chr10	128315680	128315880	+
Merged-chr10-128350461-1	chr10	128350361	128350561	+
Merged-chr10-128947768-1	chr10	128947668	128947868	+
Merged-chr10-129983999-1	chr10	129983899	129984099	+
Merged-chr14-63265354-1	chr14	63265254	63265454	+
Merged-chr14-63695287-1	chr14	63695187	63695387	+
Merged-chr11-4117900-1	chr11	4117800	4118000	+
Merged-chr11-4280199-1	chr11	4280099	4280299	+
Merged-chr11-4361293-1	chr11	4361193	4361393	+
Merged-chr11-4849483-1	chr11	4849383	4849583	+
Merged-chr14-64810345-1	chr14	64810245	64810445	+
Merged-chr14-65085905-1	chr14	65085805	65086005	+
Merged-chr14-65094004-1	chr14	65093904	65094104	+
Merged-chr11-6528730-1	chr11	6528630	6528830	+
Merged-chr14-66129290-1	chr14	66129190	66129390	+
Merged-chr14-66360807-1	chr14	66360707	66360907	+
Merged-chr14-66520460-1	chr14	66520360	66520560	+
Merged-chr11-8485048-1	chr11	8484948	8485148	+
Merged-chrY_random-49881542-1	chrY_random	49881442	49881642	+
Merged-chrY_random-51859199-1	chrY_random	51859099	51859299	+
Merged-chrY_random-55140697-1	chrY_random	55140597	55140797	+
Merged-chr5-134430229-1	chr5	134430129	134430329	+
Merged-chr5-135289766-1	chr5	135289666	135289866	+
Merged-chr5-135592321-1	chr5	135592221	135592421	+
Merged-chr5-136103791-1	chr5	136103691	136103891	+
Merged-chr5-136133247-1	chr5	136133147	136133347	+
Merged-chr2-172697267-1	chr2	172697167	172697367	+
Merged-chr2-174174939-1	chr2	174174839	174175039	+
Merged-chr2-174835395-1	chr2	174835295	174835495	+
Merged-chr2-175620391-1	chr2	175620291	175620491	+
Merged-chr2-175710291-1	chr2	175710191	175710391	+
Merged-chr2-175737733-1	chr2	175737633	175737833	+
Merged-chr2-175808172-1	chr2	175808072	175808272	+
Merged-chr2-175945330-1	chr2	175945230	175945430	+
Merged-chr2-176247628-1	chr2	176247528	176247728	+
Merged-chr2-177037095-1	chr2	177036995	177037195	+
Merged-chr5-144157521-1	chr5	144157421	144157621	+
Merged-chr5-144175973-1	chr5	144175873	144176073	+
Merged-chr5-145183762-1	chr5	145183662	145183862	+
Merged-chr5-145317580-1	chr5	145317480	145317680	+
Merged-chr2-179235945-1	chr2	179235845	179236045	+
Merged-chr5-145626314-1	chr5	145626214	145626414	+
Merged-chr5-145969307-1	chr5	145969207	145969407	+
Merged-chr5-146091366-1	chr5	146091266	146091466	+
Merged-chr5-146093878-1	chr5	146093778	146093978	+
Merged-chr5-146741396-1	chr5	146741296	146741496	+
Merged-chr3-3330502-1	chr3	3330402	3330602	+
Merged-chr3-3431125-1	chr3	3431025	3431225	+
Merged-chr3-4388019-1	chr3	4387919	4388119	+
Merged-chr3-4725160-1	chr3	4725060	4725260	+
Merged-chr5-148479421-1	chr5	148479321	148479521	+
Merged-chr3-5055311-1	chr3	5055211	5055411	+
Merged-chr5-152259620-1	chr5	152259520	152259720	+
Merged-chr6-3110268-1	chr6	3110168	3110368	+
Merged-chr6-3141335-1	chr6	3141235	3141435	+
Merged-chr6-3218588-1	chr6	3218488	3218688	+
Merged-chr3-7563838-1	chr3	7563738	7563938	+
Merged-chr3-8005863-1	chr3	8005763	8005963	+
Merged-chr3-8007100-1	chr3	8007000	8007200	+
Merged-chr3-8509409-1	chr3	8509309	8509509	+
Merged-chr3-8576234-1	chr3	8576134	8576334	+
Merged-chr3-9046049-1	chr3	9045949	9046149	+
Merged-chr6-4688934-1	chr6	4688834	4689034	+
Merged-chr3-9546677-1	chr3	9546577	9546777	+
Merged-chr3-9731888-1	chr3	9731788	9731988	+
Merged-chr3-10497466-1	chr3	10497366	10497566	+
Merged-chr3-11125964-1	chr3	11125864	11126064	+
Merged-chr14-68158651-1	chr14	68158551	68158751	+
Merged-chr14-69987689-1	chr14	69987589	69987789	+
Merged-chr11-8635969-1	chr11	8635869	8636069	+
Merged-chr11-9015897-1	chr11	9015797	9015997	+
Merged-chr11-9876021-1	chr11	9875921	9876121	+
Merged-chr11-10950617-1	chr11	10950517	10950717	+
Merged-chr14-72540440-1	chr14	72540340	72540540	+
Merged-chr14-73587538-1	chr14	73587438	73587638	+
Merged-chr11-12367446-1	chr11	12367346	12367546	+
Merged-chr14-73588803-1	chr14	73588703	73588903	+
Merged-chr14-73871395-1	chr14	73871295	73871495	+
Merged-chr14-73967896-1	chr14	73967796	73967996	+
Merged-chr14-73975577-1	chr14	73975477	73975677	+
Merged-chr14-75825446-1	chr14	75825346	75825546	+
Merged-chr11-15445625-1	chr11	15445525	15445725	+
Merged-chr14-76915463-1	chr14	76915363	76915563	+
Merged-chr14-77408439-1	chr14	77408339	77408539	+
Merged-chr11-19309326-1	chr11	19309226	19309426	+
Merged-chr11-19314761-1	chr11	19314661	19314861	+
Merged-chr11-19315665-1	chr11	19315565	19315765	+
Merged-chr11-19467436-1	chr11	19467336	19467536	+
Merged-chr14-78025921-1	chr14	78025821	78026021	+
Merged-chr14-78076417-1	chr14	78076317	78076517	+
Merged-chr14-78532708-1	chr14	78532608	78532808	+
Merged-chr11-19959887-1	chr11	19959787	19959987	+
Merged-chr11-20040496-1	chr11	20040396	20040596	+
Merged-chr11-20131279-1	chr11	20131179	20131379	+
Merged-chr14-79060790-1	chr14	79060690	79060890	+
Merged-chr14-79321259-1	chr14	79321159	79321359	+
Merged-chr14-79510023-1	chr14	79509923	79510123	+
Merged-chr14-80169700-1	chr14	80169600	80169800	+
Merged-chr11-24640227-1	chr11	24640127	24640327	+
Merged-chr14-80434044-1	chr14	80433944	80434144	+
Merged-chr14-80957378-1	chr14	80957278	80957478	+
Merged-chr14-81026616-1	chr14	81026516	81026716	+
Merged-chr14-81027171-1	chr14	81027071	81027271	+
Merged-chr14-82077143-1	chr14	82077043	82077243	+
Merged-chr14-82099991-1	chr14	82099891	82100091	+
Merged-chr14-82197573-1	chr14	82197473	82197673	+
Merged-chr11-26029234-1	chr11	26029134	26029334	+
Merged-chr11-26455962-1	chr11	26455862	26456062	+
Merged-chr11-27035394-1	chr11	27035294	27035494	+
Merged-chr14-82974556-1	chr14	82974456	82974656	+
Merged-chr14-83861225-1	chr14	83861125	83861325	+
Merged-chr14-84273248-1	chr14	84273148	84273348	+
Merged-chr14-85261685-1	chr14	85261585	85261785	+
Merged-chr14-85752949-1	chr14	85752849	85753049	+
Merged-chr11-27515780-1	chr11	27515680	27515880	+
Merged-chr11-27997467-1	chr11	27997367	27997567	+
Merged-chr11-29024819-1	chr11	29024719	29024919	+
Merged-chr14-85924346-1	chr14	85924246	85924446	+
Merged-chr14-86796060-1	chr14	86795960	86796160	+
Merged-chr14-86796959-1	chr14	86796859	86797059	+
Merged-chr14-87431451-1	chr14	87431351	87431551	+
Merged-chr11-29594238-1	chr11	29594138	29594338	+
Merged-chr11-29773673-1	chr11	29773573	29773773	+
Merged-chr14-88031456-1	chr14	88031356	88031556	+
Merged-chr14-88182202-1	chr14	88182102	88182302	+
Merged-chr14-88829725-1	chr14	88829625	88829825	+
Merged-chr14-89000264-1	chr14	89000164	89000364	+
Merged-chr14-90106592-1	chr14	90106492	90106692	+
Merged-chr11-33498611-1	chr11	33498511	33498711	+
Merged-chr6-8318509-1	chr6	8318409	8318609	+
Merged-chr6-8560205-1	chr6	8560105	8560305	+
Merged-chr6-8689383-1	chr6	8689283	8689483	+
Merged-chr6-10041186-1	chr6	10041086	10041286	+
Merged-chr3-11554016-1	chr3	11553916	11554116	+
Merged-chr6-10643190-1	chr6	10643090	10643290	+
Merged-chr6-12825461-1	chr6	12825361	12825561	+
Merged-chr6-13447677-1	chr6	13447577	13447777	+
Merged-chr6-16309926-1	chr6	16309826	16310026	+
Merged-chr6-18708001-1	chr6	18707901	18708101	+
Merged-chr6-19271615-1	chr6	19271515	19271715	+
Merged-chr6-19332410-1	chr6	19332310	19332510	+
Merged-chr6-21741986-1	chr6	21741886	21742086	+
Merged-chr3-19966529-1	chr3	19966429	19966629	+
Merged-chr6-22701288-1	chr6	22701188	22701388	+
Merged-chr6-23173839-1	chr6	23173739	23173939	+
Merged-chr6-24983316-1	chr6	24983216	24983416	+
Merged-chr6-25097032-1	chr6	25096932	25097132	+
Merged-chr3-22768121-1	chr3	22768021	22768221	+
Merged-chr3-23072945-1	chr3	23072845	23073045	+
Merged-chr3-24232217-1	chr3	24232117	24232317	+
Merged-chr3-25316597-1	chr3	25316497	25316697	+
Merged-chr3-26821604-1	chr3	26821504	26821704	+
Merged-chr6-27090954-1	chr6	27090854	27091054	+
Merged-chr6-29789642-1	chr6	29789542	29789742	+
Merged-chr3-26962935-1	chr3	26962835	26963035	+
Merged-chr3-27967381-1	chr3	27967281	27967481	+
Merged-chr6-30222546-1	chr6	30222446	30222646	+
Merged-chr6-32639396-1	chr6	32639296	32639496	+
Merged-chr6-34142235-1	chr6	34142135	34142335	+
Merged-chr3-28830322-1	chr3	28830222	28830422	+
Merged-chr3-30621187-1	chr3	30621087	30621287	+
Merged-chr3-30758622-1	chr3	30758522	30758722	+
Merged-chr6-35202572-1	chr6	35202472	35202672	+
Merged-chr6-37452940-1	chr6	37452840	37453040	+
Merged-chr6-37738256-1	chr6	37738156	37738356	+
Merged-chr3-30883856-1	chr3	30883756	30883956	+
Merged-chr3-31241300-1	chr3	31241200	31241400	+
Merged-chr3-32657668-1	chr3	32657568	32657768	+
Merged-chr6-37775544-1	chr6	37775444	37775644	+
Merged-chr6-37828393-1	chr6	37828293	37828493	+
Merged-chr6-38231823-1	chr6	38231723	38231923	+
Merged-chr6-38232577-1	chr6	38232477	38232677	+
Merged-chr6-38309071-1	chr6	38308971	38309171	+
Merged-chr3-34373281-1	chr3	34373181	34373381	+
Merged-chr3-34567668-1	chr3	34567568	34567768	+
Merged-chr6-39396155-1	chr6	39396055	39396255	+
Merged-chr6-39485078-1	chr6	39484978	39485178	+
Merged-chr6-41195434-1	chr6	41195334	41195534	+
Merged-chr6-41943428-1	chr6	41943328	41943528	+
Merged-chr6-41969137-1	chr6	41969037	41969237	+
Merged-chr6-46487851-1	chr6	46487751	46487951	+
Merged-chr3-35316524-1	chr3	35316424	35316624	+
Merged-chr3-35317607-1	chr3	35317507	35317707	+
Merged-chr3-35387892-1	chr3	35387792	35387992	+
Merged-chr3-35648770-1	chr3	35648670	35648870	+
Merged-chr14-91137957-1	chr14	91137857	91138057	+
Merged-chr14-92013841-1	chr14	92013741	92013941	+
Merged-chr14-92333598-1	chr14	92333498	92333698	+
Merged-chr14-92391929-1	chr14	92391829	92392029	+
Merged-chr14-92438064-1	chr14	92437964	92438164	+
Merged-chr14-94110197-1	chr14	94110097	94110297	+
Merged-chr11-38277012-1	chr11	38276912	38277112	+
Merged-chr11-38297877-1	chr11	38297777	38297977	+
Merged-chr14-94348818-1	chr14	94348718	94348918	+
Merged-chr14-94649783-1	chr14	94649683	94649883	+
Merged-chr14-94818273-1	chr14	94818173	94818373	+
Merged-chr14-95289935-1	chr14	95289835	95290035	+
Merged-chr14-95355536-1	chr14	95355436	95355636	+
Merged-chr14-96084791-1	chr14	96084691	96084891	+
Merged-chr11-40508494-1	chr11	40508394	40508594	+
Merged-chr11-41032388-1	chr11	41032288	41032488	+
Merged-chr11-42234427-1	chr11	42234327	42234527	+
Merged-chr11-42846037-1	chr11	42845937	42846137	+
Merged-chr11-43037680-1	chr11	43037580	43037780	+
Merged-chr14-96700741-1	chr14	96700641	96700841	+
Merged-chr14-97074298-1	chr14	97074198	97074398	+
Merged-chr14-97344444-1	chr14	97344344	97344544	+
Merged-chr14-98029202-1	chr14	98029102	98029302	+
Merged-chr14-98421717-1	chr14	98421617	98421817	+
Merged-chr14-99724149-1	chr14	99724049	99724249	+
Merged-chr11-43475955-1	chr11	43475855	43476055	+
Merged-chr11-44284066-1	chr11	44283966	44284166	+
Merged-chr14-101334500-1	chr14	101334400	101334600	+
Merged-chr14-101473315-1	chr14	101473215	101473415	+
Merged-chr14-101946843-1	chr14	101946743	101946943	+
Merged-chr11-48513611-1	chr11	48513511	48513711	+
Merged-chr14-102014928-1	chr14	102014828	102015028	+
Merged-chr14-102550742-1	chr14	102550642	102550842	+
Merged-chr14-103952200-1	chr14	103952100	103952300	+
Merged-chr11-48670414-1	chr11	48670314	48670514	+
Merged-chr11-49195468-1	chr11	49195368	49195568	+
Merged-chr11-49258967-1	chr11	49258867	49259067	+
Merged-chr11-49264448-1	chr11	49264348	49264548	+
Merged-chr11-49265648-1	chr11	49265548	49265748	+
Merged-chr11-49822087-1	chr11	49821987	49822187	+
Merged-chr11-50140377-1	chr11	50140277	50140477	+
Merged-chr14-104180167-1	chr14	104180067	104180267	+
Merged-chr14-104510481-1	chr14	104510381	104510581	+
Merged-chr14-105613105-1	chr14	105613005	105613205	+
Merged-chr14-105999993-1	chr14	105999893	106000093	+
Merged-chr11-51511692-1	chr11	51511592	51511792	+
Merged-chr11-51516932-1	chr11	51516832	51517032	+
Merged-chr11-51948408-1	chr11	51948308	51948508	+
Merged-chr14-106261533-1	chr14	106261433	106261633	+
Merged-chr1-30746511-1	chr1	30746411	30746611	+
Merged-chr1-31062469-1	chr1	31062369	31062569	+
Merged-chr14-107388749-1	chr14	107388649	107388849	+
Merged-chr14-107965918-1	chr14	107965818	107966018	+
Merged-chr1-31546350-1	chr1	31546250	31546450	+
Merged-chr14-108522040-1	chr14	108521940	108522140	+
Merged-chr1-34001033-1	chr1	34000933	34001133	+
Merged-chr1-34160748-1	chr1	34160648	34160848	+
Merged-chr14-110480107-1	chr14	110480007	110480207	+
Merged-chr14-110485122-1	chr14	110485022	110485222	+
Merged-chr1-34405608-1	chr1	34405508	34405708	+
Merged-chr14-110761801-1	chr14	110761701	110761901	+
Merged-chr1-34636504-1	chr1	34636404	34636604	+
Merged-chr14-111470423-1	chr14	111470323	111470523	+
Merged-chr14-111780964-1	chr14	111780864	111781064	+
Merged-chr14-112712565-1	chr14	112712465	112712665	+
Merged-chr14-112738637-1	chr14	112738537	112738737	+
Merged-chr14-112770656-1	chr14	112770556	112770756	+
Merged-chr1-35852245-1	chr1	35852145	35852345	+
Merged-chr14-113033684-1	chr14	113033584	113033784	+
Merged-chr14-113690790-1	chr14	113690690	113690890	+
Merged-chr1-36426004-1	chr1	36425904	36426104	+
Merged-chr1-36545593-1	chr1	36545493	36545693	+
Merged-chr14-114609325-1	chr14	114609225	114609425	+
Merged-chr14-114905434-1	chr14	114905334	114905534	+
Merged-chr11-57815988-1	chr11	57815888	57816088	+
Merged-chr11-57916232-1	chr11	57916132	57916332	+
Merged-chr11-57923788-1	chr11	57923688	57923888	+
Merged-chr1-37042889-1	chr1	37042789	37042989	+
Merged-chr1-37044782-1	chr1	37044682	37044882	+
Merged-chr14-115739891-1	chr14	115739791	115739991	+
Merged-chr1-37121676-1	chr1	37121576	37121776	+
Merged-chr14-116762475-1	chr14	116762375	116762575	+
Merged-chr1-37221584-1	chr1	37221484	37221684	+
Merged-chr11-60643937-1	chr11	60643837	60644037	+
Merged-chr11-60790484-1	chr11	60790384	60790584	+
Merged-chr11-61110299-1	chr11	61110199	61110399	+
Merged-chr11-61111036-1	chr11	61110936	61111136	+
Merged-chr1-37831327-1	chr1	37831227	37831427	+
Merged-chr1-37834039-1	chr1	37833939	37834139	+
Merged-chr1-38762293-1	chr1	38762193	38762393	+
Merged-chr1-38970277-1	chr1	38970177	38970377	+
Merged-chr1-40358570-1	chr1	40358470	40358670	+
Merged-chr1-40755707-1	chr1	40755607	40755807	+
Merged-chr1-40758600-1	chr1	40758500	40758700	+
Merged-chr1-40993109-1	chr1	40993009	40993209	+
Merged-chr1-41832658-1	chr1	41832558	41832758	+
Merged-chr1-43480053-1	chr1	43479953	43480153	+
Merged-chr1-43817138-1	chr1	43817038	43817238	+
Merged-chr1-44878218-1	chr1	44878118	44878318	+
Merged-chr1-44879339-1	chr1	44879239	44879439	+
Merged-chr1-44882904-1	chr1	44882804	44883004	+
Merged-chr1-45669421-1	chr1	45669321	45669521	+
Merged-chr1-45792488-1	chr1	45792388	45792588	+
Merged-chr1-45852312-1	chr1	45852212	45852412	+
Merged-chr1-45923029-1	chr1	45922929	45923129	+
Merged-chr1-46677757-1	chr1	46677657	46677857	+
Merged-chr1-46707512-1	chr1	46707412	46707612	+
Merged-chr1-51630051-1	chr1	51629951	51630151	+
Merged-chr1-52376967-1	chr1	52376867	52377067	+
Merged-chr1-53295147-1	chr1	53295047	53295247	+
Merged-chr3-40119240-1	chr3	40119140	40119340	+
Merged-chr3-42624468-1	chr3	42624368	42624568	+
Merged-chr3-42629975-1	chr3	42629875	42630075	+
Merged-chr3-44000544-1	chr3	44000444	44000644	+
Merged-chr3-46456385-1	chr3	46456285	46456485	+
Merged-chr3-47976659-1	chr3	47976559	47976759	+
Merged-chr3-50105364-1	chr3	50105264	50105464	+
Merged-chr3-50166034-1	chr3	50165934	50166134	+
Merged-chr3-50537099-1	chr3	50536999	50537199	+
Merged-chr3-51456402-1	chr3	51456302	51456502	+
Merged-chr3-51826673-1	chr3	51826573	51826773	+
Merged-chr3-52034517-1	chr3	52034417	52034617	+
Merged-chr3-52255900-1	chr3	52255800	52256000	+
Merged-chr3-52917796-1	chr3	52917696	52917896	+
Merged-chr3-54966395-1	chr3	54966295	54966495	+
Merged-chr3-57670470-1	chr3	57670370	57670570	+
Merged-chr3-58367870-1	chr3	58367770	58367970	+
Merged-chr3-59175914-1	chr3	59175814	59176014	+
Merged-chr3-61078276-1	chr3	61078176	61078376	+
Merged-chr3-61456769-1	chr3	61456669	61456869	+
Merged-chr3-64237647-1	chr3	64237547	64237747	+
Merged-chr3-64443440-1	chr3	64443340	64443540	+
Merged-chr3-66832225-1	chr3	66832125	66832325	+
Merged-chr3-66834048-1	chr3	66833948	66834148	+
Merged-chr3-68540416-1	chr3	68540316	68540516	+
Merged-chr3-69047687-1	chr3	69047587	69047787	+
Merged-chr3-70376152-1	chr3	70376052	70376252	+
Merged-chr3-74075843-1	chr3	74075743	74075943	+
Merged-chr3-74639291-1	chr3	74639191	74639391	+
Merged-chr3-76481603-1	chr3	76481503	76481703	+
Merged-chr3-76691293-1	chr3	76691193	76691393	+
Merged-chr3-78546898-1	chr3	78546798	78546998	+
Merged-chr3-79256752-1	chr3	79256652	79256852	+
Merged-chr3-79335797-1	chr3	79335697	79335897	+
Merged-chr3-79841485-1	chr3	79841385	79841585	+
Merged-chr3-82290899-1	chr3	82290799	82290999	+
Merged-chr3-82679555-1	chr3	82679455	82679655	+
Merged-chr3-82777835-1	chr3	82777735	82777935	+
Merged-chr11-62363951-1	chr11	62363851	62364051	+
Merged-chr11-63903400-1	chr11	63903300	63903500	+
Merged-chr11-64606056-1	chr11	64605956	64606156	+
Merged-chr11-66234646-1	chr11	66234546	66234746	+
Merged-chr11-66837620-1	chr11	66837520	66837720	+
Merged-chr11-66943923-1	chr11	66943823	66944023	+
Merged-chr11-68851437-1	chr11	68851337	68851537	+
Merged-chr11-69313498-1	chr11	69313398	69313598	+
Merged-chr11-69360297-1	chr11	69360197	69360397	+
Merged-chr11-69395583-1	chr11	69395483	69395683	+
Merged-chr11-69572707-1	chr11	69572607	69572807	+
Merged-chr11-70559418-1	chr11	70559318	70559518	+
Merged-chr11-70866297-1	chr11	70866197	70866397	+
Merged-chr11-72879322-1	chr11	72879222	72879422	+
Merged-chr11-72879689-1	chr11	72879589	72879789	+
Merged-chr11-73673872-1	chr11	73673772	73673972	+
Merged-chr11-76260803-1	chr11	76260703	76260903	+
Merged-chr11-77433221-1	chr11	77433121	77433321	+
Merged-chr11-77718439-1	chr11	77718339	77718539	+
Merged-chr11-78061538-1	chr11	78061438	78061638	+
Merged-chr11-78184066-1	chr11	78183966	78184166	+
Merged-chr11-78477562-1	chr11	78477462	78477662	+
Merged-chr11-78808164-1	chr11	78808064	78808264	+
Merged-chr1-58806433-1	chr1	58806333	58806533	+
Merged-chr1-58819667-1	chr1	58819567	58819767	+
Merged-chr1-58874654-1	chr1	58874554	58874754	+
Merged-chr1-60456590-1	chr1	60456490	60456690	+
Merged-chr1-60751224-1	chr1	60751124	60751324	+
Merged-chr1-63185424-1	chr1	63185324	63185524	+
Merged-chr1-63488964-1	chr1	63488864	63489064	+
Merged-chr1-63992025-1	chr1	63991925	63992125	+
Merged-chr11-83767689-1	chr11	83767589	83767789	+
Merged-chr1-65383953-1	chr1	65383853	65384053	+
Merged-chr1-65417628-1	chr1	65417528	65417728	+
Merged-chr1-65755364-1	chr1	65755264	65755464	+
Merged-chr1-67954834-1	chr1	67954734	67954934	+
Merged-chr1-67958118-1	chr1	67958018	67958218	+
Merged-chr1-69500509-1	chr1	69500409	69500609	+
Merged-chr1-71656921-1	chr1	71656821	71657021	+
Merged-chr1-72272803-1	chr1	72272703	72272903	+
Merged-chr1-72301836-1	chr1	72301736	72301936	+
Merged-chr1-72354048-1	chr1	72353948	72354148	+
Merged-chr1-72624115-1	chr1	72624015	72624215	+
Merged-chr1-74706631-1	chr1	74706531	74706731	+
Merged-chr1-75662876-1	chr1	75662776	75662976	+
Merged-chr3-85142311-1	chr3	85142211	85142411	+
Merged-chr3-86291177-1	chr3	86291077	86291277	+
Merged-chr3-87281917-1	chr3	87281817	87282017	+
Merged-chr3-87409315-1	chr3	87409215	87409415	+
Merged-chr3-88195601-1	chr3	88195501	88195701	+
Merged-chr3-88470655-1	chr3	88470555	88470755	+
Merged-chr3-88471839-1	chr3	88471739	88471939	+
Merged-chr3-89294893-1	chr3	89294793	89294993	+
Merged-chr3-90993786-1	chr3	90993686	90993886	+
Merged-chr3-92044450-1	chr3	92044350	92044550	+
Merged-chr3-93561091-1	chr3	93560991	93561191	+
Merged-chr3-93662926-1	chr3	93662826	93663026	+
Merged-chr3-93946067-1	chr3	93945967	93946167	+
Merged-chr3-94861639-1	chr3	94861539	94861739	+
Merged-chr3-95900362-1	chr3	95900262	95900462	+
Merged-chr3-96132483-1	chr3	96132383	96132583	+
Merged-chr3-96160143-1	chr3	96160043	96160243	+
Merged-chr3-96254591-1	chr3	96254491	96254691	+
Merged-chr3-98651109-1	chr3	98651009	98651209	+
Merged-chr3-99226153-1	chr3	99226053	99226253	+
Merged-chr3-102270647-1	chr3	102270547	102270747	+
Merged-chr11-85104773-1	chr11	85104673	85104873	+
Merged-chr11-86071331-1	chr11	86071231	86071431	+
Merged-chr11-86659389-1	chr11	86659289	86659489	+
Merged-chr11-87262184-1	chr11	87262084	87262284	+
Merged-chr11-87975733-1	chr11	87975633	87975833	+
Merged-chr11-88100056-1	chr11	88099956	88100156	+
Merged-chr11-88397008-1	chr11	88396908	88397108	+
Merged-chr11-88928930-1	chr11	88928830	88929030	+
Merged-chr11-90695620-1	chr11	90695520	90695720	+
Merged-chr11-90822691-1	chr11	90822591	90822791	+
Merged-chr11-90910188-1	chr11	90910088	90910288	+
Merged-chr11-92659187-1	chr11	92659087	92659287	+
Merged-chr11-93661938-1	chr11	93661838	93662038	+
Merged-chr11-94030395-1	chr11	94030295	94030495	+
Merged-chr11-95510275-1	chr11	95510175	95510375	+
Merged-chr11-96084496-1	chr11	96084396	96084596	+
Merged-chr11-96574613-1	chr11	96574513	96574713	+
Merged-chr1-78164742-1	chr1	78164642	78164842	+
Merged-chr1-79940572-1	chr1	79940472	79940672	+
Merged-chr11-96790552-1	chr11	96790452	96790652	+
Merged-chr11-97755910-1	chr11	97755810	97756010	+
Merged-chr1-83228890-1	chr1	83228790	83228990	+
Merged-chr1-84328932-1	chr1	84328832	84329032	+
Merged-chr1-84329749-1	chr1	84329649	84329849	+
Merged-chr1-85207459-1	chr1	85207359	85207559	+
Merged-chr1-87348927-1	chr1	87348827	87349027	+
Merged-chr11-98322864-1	chr11	98322764	98322964	+
Merged-chr11-98475041-1	chr11	98474941	98475141	+
Merged-chr11-98720480-1	chr11	98720380	98720580	+
Merged-chr11-99105670-1	chr11	99105570	99105770	+
Merged-chr1-88208642-1	chr1	88208542	88208742	+
Merged-chr11-100083950-1	chr11	100083850	100084050	+
Merged-chr1-89083748-1	chr1	89083648	89083848	+
Merged-chr1-89357477-1	chr1	89357377	89357577	+
Merged-chr1-89570569-1	chr1	89570469	89570669	+
Merged-chr1-89774335-1	chr1	89774235	89774435	+
Merged-chr1-90225132-1	chr1	90225032	90225232	+
Merged-chr11-101303644-1	chr11	101303544	101303744	+
Merged-chr11-101485208-1	chr11	101485108	101485308	+
Merged-chr1-90511031-1	chr1	90510931	90511131	+
Merged-chr1-90704407-1	chr1	90704307	90704507	+
Merged-chr1-91883605-1	chr1	91883505	91883705	+
Merged-chr1-92798003-1	chr1	92797903	92798103	+
Merged-chr1-94604148-1	chr1	94604048	94604248	+
Merged-chr1-95007600-1	chr1	95007500	95007700	+
Merged-chr1-95120769-1	chr1	95120669	95120869	+
Merged-chr1-96152242-1	chr1	96152142	96152342	+
Merged-chr1-96743470-1	chr1	96743370	96743570	+
Merged-chr1-97413960-1	chr1	97413860	97414060	+
Merged-chr1-98379476-1	chr1	98379376	98379576	+
Merged-chr1-99419965-1	chr1	99419865	99420065	+
Merged-chr1-100499858-1	chr1	100499758	100499958	+
Merged-chr1-101460700-1	chr1	101460600	101460800	+
Merged-chr1-102839433-1	chr1	102839333	102839533	+
Merged-chr1-103653875-1	chr1	103653775	103653975	+
Merged-chr1-104502498-1	chr1	104502398	104502598	+
Merged-chr1-104899563-1	chr1	104899463	104899663	+
Merged-chr1-105107483-1	chr1	105107383	105107583	+
Merged-chr1-106190870-1	chr1	106190770	106190970	+
Merged-chr1-106664956-1	chr1	106664856	106665056	+
Merged-chr1-106967697-1	chr1	106967597	106967797	+
Merged-chr1-108530078-1	chr1	108529978	108530178	+
Merged-chr1-109875235-1	chr1	109875135	109875335	+
Merged-chr1-110503965-1	chr1	110503865	110504065	+
Merged-chr8-38640810-1	chr8	38640710	38640910	+
Merged-chr8-40280084-1	chr8	40279984	40280184	+
Merged-chr8-40470486-1	chr8	40470386	40470586	+
Merged-chr8-40910998-1	chr8	40910898	40911098	+
Merged-chr8-41652809-1	chr8	41652709	41652909	+
Merged-chr8-41655897-1	chr8	41655797	41655997	+
Merged-chr8-45285292-1	chr8	45285192	45285392	+
Merged-chr8-45368740-1	chr8	45368640	45368840	+
Merged-chr8-46120272-1	chr8	46120172	46120372	+
Merged-chr8-46247967-1	chr8	46247867	46248067	+
Merged-chr8-46528981-1	chr8	46528881	46529081	+
Merged-chr8-49266674-1	chr8	49266574	49266774	+
Merged-chr8-51684000-1	chr8	51683900	51684100	+
Merged-chr8-51743207-1	chr8	51743107	51743307	+
Merged-chr8-51767650-1	chr8	51767550	51767750	+
Merged-chr8-52480806-1	chr8	52480706	52480906	+
Merged-chr8-56206009-1	chr8	56205909	56206109	+
Merged-chr8-57994467-1	chr8	57994367	57994567	+
Merged-chr8-58660302-1	chr8	58660202	58660402	+
Merged-chr8-58730712-1	chr8	58730612	58730812	+
Merged-chr8-59020992-1	chr8	59020892	59021092	+
Merged-chr8-59281547-1	chr8	59281447	59281647	+
Merged-chr8-60797133-1	chr8	60797033	60797233	+
Merged-chr8-60971911-1	chr8	60971811	60972011	+
Merged-chr8-61617318-1	chr8	61617218	61617418	+
Merged-chr8-63849891-1	chr8	63849791	63849991	+
Merged-chr8-63916030-1	chr8	63915930	63916130	+
Merged-chr8-64220136-1	chr8	64220036	64220236	+
Merged-chr8-64822762-1	chr8	64822662	64822862	+
Merged-chr8-65284367-1	chr8	65284267	65284467	+
Merged-chr8-65494228-1	chr8	65494128	65494328	+
Merged-chr8-66732494-1	chr8	66732394	66732594	+
Merged-chr8-67076444-1	chr8	67076344	67076544	+
Merged-chr8-67962472-1	chr8	67962372	67962572	+
Merged-chr8-70318061-1	chr8	70317961	70318161	+
Merged-chr8-71985952-1	chr8	71985852	71986052	+
Merged-chr8-72018687-1	chr8	72018587	72018787	+
Merged-chr8-72168265-1	chr8	72168165	72168365	+
Merged-chr3-102926872-1	chr3	102926772	102926972	+
Merged-chr3-103011971-1	chr3	103011871	103012071	+
Merged-chr3-103872974-1	chr3	103872874	103873074	+
Merged-chr17-71351637-1	chr17	71351537	71351737	+
Merged-chr17-72194377-1	chr17	72194277	72194477	+
Merged-chr17-72799211-1	chr17	72799111	72799311	+
Merged-chr17-74744388-1	chr17	74744288	74744488	+
Merged-chr3-105490473-1	chr3	105490373	105490573	+
Merged-chr3-106351530-1	chr3	106351430	106351630	+
Merged-chr3-107138091-1	chr3	107137991	107138191	+
Merged-chr3-107734729-1	chr3	107734629	107734829	+
Merged-chr3-107791295-1	chr3	107791195	107791395	+
Merged-chr3-108316607-1	chr3	108316507	108316707	+
Merged-chr17-76473012-1	chr17	76472912	76473112	+
Merged-chr17-78874399-1	chr17	78874299	78874499	+
Merged-chr17-79742179-1	chr17	79742079	79742279	+
Merged-chr3-108740905-1	chr3	108740805	108741005	+
Merged-chr3-114468990-1	chr3	114468890	114469090	+
Merged-chr3-116269322-1	chr3	116269222	116269422	+
Merged-chr17-80575315-1	chr17	80575215	80575415	+
Merged-chr17-80882516-1	chr17	80882416	80882616	+
Merged-chr17-81073844-1	chr17	81073744	81073944	+
Merged-chr3-117087718-1	chr3	117087618	117087818	+
Merged-chr17-81198198-1	chr17	81198098	81198298	+
Merged-chr17-81200871-1	chr17	81200771	81200971	+
Merged-chr17-81244735-1	chr17	81244635	81244835	+
Merged-chr17-81646075-1	chr17	81645975	81646175	+
Merged-chr17-82568846-1	chr17	82568746	82568946	+
Merged-chr3-125590223-1	chr3	125590123	125590323	+
Merged-chr3-125736810-1	chr3	125736710	125736910	+
Merged-chr3-125831205-1	chr3	125831105	125831305	+
Merged-chr3-126282696-1	chr3	126282596	126282796	+
Merged-chr17-83895164-1	chr17	83895064	83895264	+
Merged-chr3-129044210-1	chr3	129044110	129044310	+
Merged-chr3-129246755-1	chr3	129246655	129246855	+
Merged-chr3-129356985-1	chr3	129356885	129357085	+
Merged-chr17-85120165-1	chr17	85120065	85120265	+
Merged-chr3-130150870-1	chr3	130150770	130150970	+
Merged-chr3-131006240-1	chr3	131006140	131006340	+
Merged-chr3-133727484-1	chr3	133727384	133727584	+
Merged-chr17-85589070-1	chr17	85588970	85589170	+
Merged-chr17-85903382-1	chr17	85903282	85903482	+
Merged-chr17-87354654-1	chr17	87354554	87354754	+
Merged-chr17-87447567-1	chr17	87447467	87447667	+
Merged-chr3-133902225-1	chr3	133902125	133902325	+
Merged-chr3-134200068-1	chr3	134199968	134200168	+
Merged-chr3-135209626-1	chr3	135209526	135209726	+
Merged-chr3-135287527-1	chr3	135287427	135287627	+
Merged-chr3-135837151-1	chr3	135837051	135837251	+
Merged-chr3-135843516-1	chr3	135843416	135843616	+
Merged-chr3-136273243-1	chr3	136273143	136273343	+
Merged-chr17-87993185-1	chr17	87993085	87993285	+
Merged-chr17-88091483-1	chr17	88091383	88091583	+
Merged-chr17-88150327-1	chr17	88150227	88150427	+
Merged-chr3-137496225-1	chr3	137496125	137496325	+
Merged-chr3-138489531-1	chr3	138489431	138489631	+
Merged-chr17-89884916-1	chr17	89884816	89885016	+
Merged-chr17-89886083-1	chr17	89885983	89886183	+
Merged-chr17-90264596-1	chr17	90264496	90264696	+
Merged-chr3-140045634-1	chr3	140045534	140045734	+
Merged-chr3-140811393-1	chr3	140811293	140811493	+
Merged-chr3-143860400-1	chr3	143860300	143860500	+
Merged-chr17-92542020-1	chr17	92541920	92542120	+
Merged-chr18-3141289-1	chr18	3141189	3141389	+
Merged-chr11-101519629-1	chr11	101519529	101519729	+
Merged-chr11-102417663-1	chr11	102417563	102417763	+
Merged-chr11-102682015-1	chr11	102681915	102682115	+
Merged-chr11-103071810-1	chr11	103071710	103071910	+
Merged-chr11-104568732-1	chr11	104568632	104568832	+
Merged-chr11-104973100-1	chr11	104973000	104973200	+
Merged-chr11-105024424-1	chr11	105024324	105024524	+
Merged-chr11-106154213-1	chr11	106154113	106154313	+
Merged-chr11-106157895-1	chr11	106157795	106157995	+
Merged-chr11-106830602-1	chr11	106830502	106830702	+
Merged-chr11-107138395-1	chr11	107138295	107138495	+
Merged-chr11-109775406-1	chr11	109775306	109775506	+
Merged-chr11-110250049-1	chr11	110249949	110250149	+
Merged-chr11-111045298-1	chr11	111045198	111045398	+
Merged-chr11-111082063-1	chr11	111081963	111082163	+
Merged-chr11-111082831-1	chr11	111082731	111082931	+
Merged-chr11-111221741-1	chr11	111221641	111221841	+
Merged-chr11-111848156-1	chr11	111848056	111848256	+
Merged-chr11-113021039-1	chr11	113020939	113021139	+
Merged-chr11-116076648-1	chr11	116076548	116076748	+
Merged-chr11-116109106-1	chr11	116109006	116109206	+
Merged-chr1-112230456-1	chr1	112230356	112230556	+
Merged-chr1-113154043-1	chr1	113153943	113154143	+
Merged-chr1-114408863-1	chr1	114408763	114408963	+
Merged-chr1-114913578-1	chr1	114913478	114913678	+
Merged-chr1-115856077-1	chr1	115855977	115856177	+
Merged-chr1-116111551-1	chr1	116111451	116111651	+
Merged-chr1-117505552-1	chr1	117505452	117505652	+
Merged-chr1-119936635-1	chr1	119936535	119936735	+
Merged-chr1-120356113-1	chr1	120356013	120356213	+
Merged-chr11-117455407-1	chr11	117455307	117455507	+
Merged-chr11-117469722-1	chr11	117469622	117469822	+
Merged-chr11-118527236-1	chr11	118527136	118527336	+
Merged-chr1-121245186-1	chr1	121245086	121245286	+
Merged-chr11-120182054-1	chr11	120181954	120182154	+
Merged-chr1-121703329-1	chr1	121703229	121703429	+
Merged-chr1-123929629-1	chr1	123929529	123929729	+
Merged-chr12-3002685-1	chr12	3002585	3002785	+
Merged-chr12-3003729-1	chr12	3003629	3003829	+
Merged-chr12-3507252-1	chr12	3507152	3507352	+
Merged-chr1-125748340-1	chr1	125748240	125748440	+
Merged-chr1-126992787-1	chr1	126992687	126992887	+
Merged-chr1-129986537-1	chr1	129986437	129986637	+
Merged-chr1-132584840-1	chr1	132584740	132584940	+
Merged-chr1-134877993-1	chr1	134877893	134878093	+
Merged-chr1-135065447-1	chr1	135065347	135065547	+
Merged-chr1-136300479-1	chr1	136300379	136300579	+
Merged-chr1-136301798-1	chr1	136301698	136301898	+
Merged-chr1-138467002-1	chr1	138466902	138467102	+
Merged-chr1-140076787-1	chr1	140076687	140076887	+
Merged-chr1-140753603-1	chr1	140753503	140753703	+
Merged-chr1-140846814-1	chr1	140846714	140846914	+
Merged-chr8-72279498-1	chr8	72279398	72279598	+
Merged-chr8-72425608-1	chr8	72425508	72425708	+
Merged-chr8-73063222-1	chr8	73063122	73063322	+
Merged-chr8-73171387-1	chr8	73171287	73171487	+
Merged-chr8-73290309-1	chr8	73290209	73290409	+
Merged-chr8-73434033-1	chr8	73433933	73434133	+
Merged-chr8-73617918-1	chr8	73617818	73618018	+
Merged-chr8-73686293-1	chr8	73686193	73686393	+
Merged-chr8-73909300-1	chr8	73909200	73909400	+
Merged-chr8-74211649-1	chr8	74211549	74211749	+
Merged-chr8-74858284-1	chr8	74858184	74858384	+
Merged-chr8-76054767-1	chr8	76054667	76054867	+
Merged-chr8-76875071-1	chr8	76874971	76875171	+
Merged-chr8-77111446-1	chr8	77111346	77111546	+
Merged-chr8-79665105-1	chr8	79665005	79665205	+
Merged-chr8-80622081-1	chr8	80621981	80622181	+
Merged-chr8-80664780-1	chr8	80664680	80664880	+
Merged-chr8-81037198-1	chr8	81037098	81037298	+
Merged-chr8-83009449-1	chr8	83009349	83009549	+
Merged-chr8-83553395-1	chr8	83553295	83553495	+
Merged-chr8-83568238-1	chr8	83568138	83568338	+
Merged-chr8-85683845-1	chr8	85683745	85683945	+
Merged-chr8-86114769-1	chr8	86114669	86114869	+
Merged-chr8-86176453-1	chr8	86176353	86176553	+
Merged-chr8-86716801-1	chr8	86716701	86716901	+
Merged-chr8-87025757-1	chr8	87025657	87025857	+
Merged-chr8-87192770-1	chr8	87192670	87192870	+
Merged-chr8-87736614-1	chr8	87736514	87736714	+
Merged-chr8-88448259-1	chr8	88448159	88448359	+
Merged-chr8-90907259-1	chr8	90907159	90907359	+
Merged-chr8-91111272-1	chr8	91111172	91111372	+
Merged-chr8-91235386-1	chr8	91235286	91235486	+
Merged-chr3-145509132-1	chr3	145509032	145509232	+
Merged-chr3-145752513-1	chr3	145752413	145752613	+
Merged-chr3-145991197-1	chr3	145991097	145991297	+
Merged-chr18-3620188-1	chr18	3620088	3620288	+
Merged-chr18-3626564-1	chr18	3626464	3626664	+
Merged-chr18-4482510-1	chr18	4482410	4482610	+
Merged-chr18-4538167-1	chr18	4538067	4538267	+
Merged-chr18-4539349-1	chr18	4539249	4539449	+
Merged-chr3-147222644-1	chr3	147222544	147222744	+
Merged-chr18-5085164-1	chr18	5085064	5085264	+
Merged-chr18-5875233-1	chr18	5875133	5875333	+
Merged-chr18-6231644-1	chr18	6231544	6231744	+
Merged-chr18-6676893-1	chr18	6676793	6676993	+
Merged-chr18-6867741-1	chr18	6867641	6867841	+
Merged-chr3-148909248-1	chr3	148909148	148909348	+
Merged-chr3-150003826-1	chr3	150003726	150003926	+
Merged-chr3-150693181-1	chr3	150693081	150693281	+
Merged-chr3-153115876-1	chr3	153115776	153115976	+
Merged-chr18-7241784-1	chr18	7241684	7241884	+
Merged-chr18-7692999-1	chr18	7692899	7693099	+
Merged-chr18-8012781-1	chr18	8012681	8012881	+
Merged-chr3-154756172-1	chr3	154756072	154756272	+
Merged-chr3-156984162-1	chr3	156984062	156984262	+
Merged-chr3-156984955-1	chr3	156984855	156985055	+
Merged-chr3-157694829-1	chr3	157694729	157694929	+
Merged-chr3-157695280-1	chr3	157695180	157695380	+
Merged-chr3-158536069-1	chr3	158535969	158536169	+
Merged-chr3-158542403-1	chr3	158542303	158542503	+
Merged-chr3-158893646-1	chr3	158893546	158893746	+
Merged-chr4-4165781-1	chr4	4165681	4165881	+
Merged-chr18-12534497-1	chr18	12534397	12534597	+
Merged-chr18-13041559-1	chr18	13041459	13041659	+
Merged-chr4-4477637-1	chr4	4477537	4477737	+
Merged-chr4-4492727-1	chr4	4492627	4492827	+
Merged-chr4-6091118-1	chr4	6091018	6091218	+
Merged-chr18-15222145-1	chr18	15222045	15222245	+
Merged-chr18-16461968-1	chr18	16461868	16462068	+
Merged-chr18-18097370-1	chr18	18097270	18097470	+
Merged-chr18-19665962-1	chr18	19665862	19666062	+
Merged-chr18-21421439-1	chr18	21421339	21421539	+
Merged-chr4-9931312-1	chr4	9931212	9931412	+
Merged-chr4-10281553-1	chr4	10281453	10281653	+
Merged-chr4-10359730-1	chr4	10359630	10359830	+
Merged-chr18-24193157-1	chr18	24193057	24193257	+
Merged-chr18-24629265-1	chr18	24629165	24629365	+
Merged-chr18-25107724-1	chr18	25107624	25107824	+
Merged-chr18-26163584-1	chr18	26163484	26163684	+
Merged-chr4-15586590-1	chr4	15586490	15586690	+
Merged-chr4-15674302-1	chr4	15674202	15674402	+
Merged-chr4-16559194-1	chr4	16559094	16559294	+
Merged-chr4-17758177-1	chr4	17758077	17758277	+
Merged-chr18-28629895-1	chr18	28629795	28629995	+
Merged-chr18-29532634-1	chr18	29532534	29532734	+
Merged-chr18-30665426-1	chr18	30665326	30665526	+
Merged-chr12-4555579-1	chr12	4555479	4555679	+
Merged-chr12-6524321-1	chr12	6524221	6524421	+
Merged-chr12-6810357-1	chr12	6810257	6810457	+
Merged-chr12-12673631-1	chr12	12673531	12673731	+
Merged-chr12-17883557-1	chr12	17883457	17883657	+
Merged-chr12-18137940-1	chr12	18137840	18138040	+
Merged-chr12-18812611-1	chr12	18812511	18812711	+
Merged-chr12-19556886-1	chr12	19556786	19556986	+
Merged-chr12-20911999-1	chr12	20911899	20912099	+
Merged-chr12-21045798-1	chr12	21045698	21045898	+
Merged-chr12-21397032-1	chr12	21396932	21397132	+
Merged-chr12-21837334-1	chr12	21837234	21837434	+
Merged-chr1-141391425-1	chr1	141391325	141391525	+
Merged-chr1-141626230-1	chr1	141626130	141626330	+
Merged-chr1-144213853-1	chr1	144213753	144213953	+
Merged-chr1-144486268-1	chr1	144486168	144486368	+
Merged-chr1-145299821-1	chr1	145299721	145299921	+
Merged-chr12-23884061-1	chr12	23883961	23884161	+
Merged-chr12-24221161-1	chr12	24221061	24221261	+
Merged-chr12-24245653-1	chr12	24245553	24245753	+
Merged-chr12-24249869-1	chr12	24249769	24249969	+
Merged-chr12-24405463-1	chr12	24405363	24405563	+
Merged-chr12-24442131-1	chr12	24442031	24442231	+
Merged-chr12-24652099-1	chr12	24651999	24652199	+
Merged-chr1-146630731-1	chr1	146630631	146630831	+
Merged-chr1-147404766-1	chr1	147404666	147404866	+
Merged-chr1-147971067-1	chr1	147970967	147971167	+
Merged-chr1-148049307-1	chr1	148049207	148049407	+
Merged-chr1-149659166-1	chr1	149659066	149659266	+
Merged-chr1-150016137-1	chr1	150016037	150016237	+
Merged-chr12-25035413-1	chr12	25035313	25035513	+
Merged-chr12-25125414-1	chr12	25125314	25125514	+
Merged-chr12-25183386-1	chr12	25183286	25183486	+
Merged-chr1-150304584-1	chr1	150304484	150304684	+
Merged-chr1-150310090-1	chr1	150309990	150310190	+
Merged-chr1-151353788-1	chr1	151353688	151353888	+
Merged-chr1-151359919-1	chr1	151359819	151360019	+
Merged-chr1-151487083-1	chr1	151486983	151487183	+
Merged-chr12-32714264-1	chr12	32714164	32714364	+
Merged-chr12-35717880-1	chr12	35717780	35717980	+
Merged-chr12-38386056-1	chr12	38385956	38386156	+
Merged-chr12-38751535-1	chr12	38751435	38751635	+
Merged-chr1-155927900-1	chr1	155927800	155928000	+
Merged-chr1-156140008-1	chr1	156139908	156140108	+
Merged-chr1-156635415-1	chr1	156635315	156635515	+
Merged-chr1-156834426-1	chr1	156834326	156834526	+
Merged-chr1-161184360-1	chr1	161184260	161184460	+
Merged-chr1-163464583-1	chr1	163464483	163464683	+
Merged-chr1-163609217-1	chr1	163609117	163609317	+
Merged-chr1-164500773-1	chr1	164500673	164500873	+
Merged-chr1-164519770-1	chr1	164519670	164519870	+
Merged-chr1-165587651-1	chr1	165587551	165587751	+
Merged-chr1-165709564-1	chr1	165709464	165709664	+
Merged-chr1-167327684-1	chr1	167327584	167327784	+
Merged-chr1-167892209-1	chr1	167892109	167892309	+
Merged-chr1-168094971-1	chr1	168094871	168095071	+
Merged-chr1-168282931-1	chr1	168282831	168283031	+
Merged-chr1-169280440-1	chr1	169280340	169280540	+
Merged-chr1-172049078-1	chr1	172048978	172049178	+
Merged-chr8-91650551-1	chr8	91650451	91650651	+
Merged-chr8-91794071-1	chr8	91793971	91794171	+
Merged-chr8-93349100-1	chr8	93349000	93349200	+
Merged-chr8-93432245-1	chr8	93432145	93432345	+
Merged-chr8-93530625-1	chr8	93530525	93530725	+
Merged-chr8-94141490-1	chr8	94141390	94141590	+
Merged-chr8-94887271-1	chr8	94887171	94887371	+
Merged-chr8-95315042-1	chr8	95314942	95315142	+
Merged-chr8-96311289-1	chr8	96311189	96311389	+
Merged-chr8-97228044-1	chr8	97227944	97228144	+
Merged-chr8-97319617-1	chr8	97319517	97319717	+
Merged-chr8-97555211-1	chr8	97555111	97555311	+
Merged-chr8-98174915-1	chr8	98174815	98175015	+
Merged-chr8-98412382-1	chr8	98412282	98412482	+
Merged-chr8-100156640-1	chr8	100156540	100156740	+
Merged-chr8-100625414-1	chr8	100625314	100625514	+
Merged-chr8-101691878-1	chr8	101691778	101691978	+
Merged-chr8-102230477-1	chr8	102230377	102230577	+
Merged-chr8-102774048-1	chr8	102773948	102774148	+
Merged-chr8-102779103-1	chr8	102779003	102779203	+
Merged-chr8-104568932-1	chr8	104568832	104569032	+
Merged-chr8-104651658-1	chr8	104651558	104651758	+
Merged-chr8-107165834-1	chr8	107165734	107165934	+
Merged-chr8-107530879-1	chr8	107530779	107530979	+
Merged-chr8-107532045-1	chr8	107531945	107532145	+
Merged-chr8-107898774-1	chr8	107898674	107898874	+
Merged-chr8-108535379-1	chr8	108535279	108535479	+
Merged-chr8-110461967-1	chr8	110461867	110462067	+
Merged-chr8-111246980-1	chr8	111246880	111247080	+
Merged-chr8-112089500-1	chr8	112089400	112089600	+
Merged-chr8-112263501-1	chr8	112263401	112263601	+
Merged-chr8-114174737-1	chr8	114174637	114174837	+
Merged-chr8-114965525-1	chr8	114965425	114965625	+
Merged-chr8-115642325-1	chr8	115642225	115642425	+
Merged-chr8-116436784-1	chr8	116436684	116436884	+
Merged-chr4-18735868-1	chr4	18735768	18735968	+
Merged-chr4-19082449-1	chr4	19082349	19082549	+
Merged-chr4-19083613-1	chr4	19083513	19083713	+
Merged-chr4-19414845-1	chr4	19414745	19414945	+
Merged-chr4-19693693-1	chr4	19693593	19693793	+
Merged-chr4-20102211-1	chr4	20102111	20102311	+
Merged-chr18-31927596-1	chr18	31927496	31927696	+
Merged-chr18-32275054-1	chr18	32274954	32275154	+
Merged-chr4-20164074-1	chr4	20163974	20164174	+
Merged-chr18-33191274-1	chr18	33191174	33191374	+
Merged-chr18-34080720-1	chr18	34080620	34080820	+
Merged-chr4-24810807-1	chr4	24810707	24810907	+
Merged-chr4-25776173-1	chr4	25776073	25776273	+
Merged-chr4-25780429-1	chr4	25780329	25780529	+
Merged-chr4-27342877-1	chr4	27342777	27342977	+
Merged-chr18-35019809-1	chr18	35019709	35019909	+
Merged-chr18-36023008-1	chr18	36022908	36023108	+
Merged-chr18-36034855-1	chr18	36034755	36034955	+
Merged-chr18-36413171-1	chr18	36413071	36413271	+
Merged-chr4-29019158-1	chr4	29019058	29019258	+
Merged-chr18-36512338-1	chr18	36512238	36512438	+
Merged-chr18-36640412-1	chr18	36640312	36640512	+
Merged-chr18-37524165-1	chr18	37524065	37524265	+
Merged-chr4-33386039-1	chr4	33385939	33386139	+
Merged-chr4-34120158-1	chr4	34120058	34120258	+
Merged-chr18-38724857-1	chr18	38724757	38724957	+
Merged-chr18-38769377-1	chr18	38769277	38769477	+
Merged-chr18-39100241-1	chr18	39100141	39100341	+
Merged-chr4-35488219-1	chr4	35488119	35488319	+
Merged-chr4-35550561-1	chr4	35550461	35550661	+
Merged-chr18-39481596-1	chr18	39481496	39481696	+
Merged-chr18-41409800-1	chr18	41409700	41409900	+
Merged-chr4-37950593-1	chr4	37950493	37950693	+
Merged-chr4-38823903-1	chr4	38823803	38824003	+
Merged-chr4-38853324-1	chr4	38853224	38853424	+
Merged-chr4-39341976-1	chr4	39341876	39342076	+
Merged-chr4-39703852-1	chr4	39703752	39703952	+
Merged-chr18-45235588-1	chr18	45235488	45235688	+
Merged-chr4-40006754-1	chr4	40006654	40006854	+
Merged-chr4-40175854-1	chr4	40175754	40175954	+
Merged-chr4-40248289-1	chr4	40248189	40248389	+
Merged-chr4-40553533-1	chr4	40553433	40553633	+
Merged-chr18-45522851-1	chr18	45522751	45522951	+
Merged-chr18-46069527-1	chr18	46069427	46069627	+
Merged-chr18-46599326-1	chr18	46599226	46599426	+
Merged-chr18-47002506-1	chr18	47002406	47002606	+
Merged-chr18-47200278-1	chr18	47200178	47200378	+
Merged-chr18-47813204-1	chr18	47813104	47813304	+
Merged-chr18-48170028-1	chr18	48169928	48170128	+
Merged-chr4-42091622-1	chr4	42091522	42091722	+
Merged-chr4-43044343-1	chr4	43044243	43044443	+
Merged-chr4-43418090-1	chr4	43417990	43418190	+
Merged-chr18-50012436-1	chr18	50012336	50012536	+
Merged-chr18-52482885-1	chr18	52482785	52482985	+
Merged-chr18-53910195-1	chr18	53910095	53910295	+
Merged-chr18-54029967-1	chr18	54029867	54030067	+
Merged-chr4-43764518-1	chr4	43764418	43764618	+
Merged-chr4-45520228-1	chr4	45520128	45520328	+
Merged-chr18-58478965-1	chr18	58478865	58479065	+
Merged-chr12-40861652-1	chr12	40861552	40861752	+
Merged-chr12-40985415-1	chr12	40985315	40985515	+
Merged-chr12-41135656-1	chr12	41135556	41135756	+
Merged-chr12-43730884-1	chr12	43730784	43730984	+
Merged-chr12-45055585-1	chr12	45055485	45055685	+
Merged-chr12-45882180-1	chr12	45882080	45882280	+
Merged-chr12-47290548-1	chr12	47290448	47290648	+
Merged-chr12-49633418-1	chr12	49633318	49633518	+
Merged-chr12-49997685-1	chr12	49997585	49997785	+
Merged-chr12-52080184-1	chr12	52080084	52080284	+
Merged-chr12-52081254-1	chr12	52081154	52081354	+
Merged-chr12-53891910-1	chr12	53891810	53892010	+
Merged-chr12-55227414-1	chr12	55227314	55227514	+
Merged-chr12-55782398-1	chr12	55782298	55782498	+
Merged-chr12-55783473-1	chr12	55783373	55783573	+
Merged-chr12-55972588-1	chr12	55972488	55972688	+
Merged-chr12-56768579-1	chr12	56768479	56768679	+
Merged-chr1-173787443-1	chr1	173787343	173787543	+
Merged-chr1-173794266-1	chr1	173794166	173794366	+
Merged-chr12-57849359-1	chr12	57849259	57849459	+
Merged-chr12-57851999-1	chr12	57851899	57852099	+
Merged-chr12-60542363-1	chr12	60542263	60542463	+
Merged-chr12-61878187-1	chr12	61878087	61878287	+
Merged-chr12-63636863-1	chr12	63636763	63636963	+
Merged-chr1-175799552-1	chr1	175799452	175799652	+
Merged-chr1-177984800-1	chr1	177984700	177984900	+
Merged-chr1-179707571-1	chr1	179707471	179707671	+
Merged-chr1-180044113-1	chr1	180044013	180044213	+
Merged-chr1-180457466-1	chr1	180457366	180457566	+
Merged-chr12-66738405-1	chr12	66738305	66738505	+
Merged-chr12-66741293-1	chr12	66741193	66741393	+
Merged-chr12-67428121-1	chr12	67428021	67428221	+
Merged-chr12-69662926-1	chr12	69662826	69663026	+
Merged-chr12-69664264-1	chr12	69664164	69664364	+
Merged-chr12-69728022-1	chr12	69727922	69728122	+
Merged-chr1-181406807-1	chr1	181406707	181406907	+
Merged-chr1-181468783-1	chr1	181468683	181468883	+
Merged-chr12-72025253-1	chr12	72025153	72025353	+
Merged-chr12-72959563-1	chr12	72959463	72959663	+
Merged-chr1-182028566-1	chr1	182028466	182028666	+
Merged-chr1-182818966-1	chr1	182818866	182819066	+
Merged-chr1-183195251-1	chr1	183195151	183195351	+
Merged-chr1-183423989-1	chr1	183423889	183424089	+
Merged-chr1-183428108-1	chr1	183428008	183428208	+
Merged-chr1-184112181-1	chr1	184112081	184112281	+
Merged-chr1-185843381-1	chr1	185843281	185843481	+
Merged-chr1-186919821-1	chr1	186919721	186919921	+
Merged-chr1-190983551-1	chr1	190983451	190983651	+
Merged-chr1-196869490-1	chr1	196869390	196869590	+
Merged-chr1-196940039-1	chr1	196939939	196940139	+
Merged-chr1-197175671-1	chr1	197175571	197175771	+
Merged-chr10-3249911-1	chr10	3249811	3250011	+
Merged-chr8-117457290-1	chr8	117457190	117457390	+
Merged-chr8-117589691-1	chr8	117589591	117589791	+
Merged-chr8-118589046-1	chr8	118588946	118589146	+
Merged-chr8-118920923-1	chr8	118920823	118921023	+
Merged-chr8-119197525-1	chr8	119197425	119197625	+
Merged-chr8-119526654-1	chr8	119526554	119526754	+
Merged-chr8-119527207-1	chr8	119527107	119527307	+
Merged-chr8-119819169-1	chr8	119819069	119819269	+
Merged-chr8-120326430-1	chr8	120326330	120326530	+
Merged-chr8-121492589-1	chr8	121492489	121492689	+
Merged-chr8-122152320-1	chr8	122152220	122152420	+
Merged-chr8-122805718-1	chr8	122805618	122805818	+
Merged-chr8-123094365-1	chr8	123094265	123094465	+
Merged-chr8-123142205-1	chr8	123142105	123142305	+
Merged-chr8-123346968-1	chr8	123346868	123347068	+
Merged-chr8-123351939-1	chr8	123351839	123352039	+
Merged-chr8-123716705-1	chr8	123716605	123716805	+
Merged-chr8-123935849-1	chr8	123935749	123935949	+
Merged-chr8-124580282-1	chr8	124580182	124580382	+
Merged-chr8-124629402-1	chr8	124629302	124629502	+
Merged-chr8-124874467-1	chr8	124874367	124874567	+
Merged-chr8-125047122-1	chr8	125047022	125047222	+
Merged-chr8-125847666-1	chr8	125847566	125847766	+
Merged-chr8-125977988-1	chr8	125977888	125978088	+
Merged-chr8-126065817-1	chr8	126065717	126065917	+
Merged-chr8-126069511-1	chr8	126069411	126069611	+
Merged-chr8-126074538-1	chr8	126074438	126074638	+
Merged-chr8-126082110-1	chr8	126082010	126082210	+
Merged-chr8-126084764-1	chr8	126084664	126084864	+
Merged-chr8-126091584-1	chr8	126091484	126091684	+
Merged-chr8-126092730-1	chr8	126092630	126092830	+
Merged-chr8-126099740-1	chr8	126099640	126099840	+
Merged-chr8-126105151-1	chr8	126105051	126105251	+
Merged-chr8-126117032-1	chr8	126116932	126117132	+
Merged-chr8-126120231-1	chr8	126120131	126120331	+
Merged-chr8-126123584-1	chr8	126123484	126123684	+
Merged-chr8-126125336-1	chr8	126125236	126125436	+
Merged-chr8-126130195-1	chr8	126130095	126130295	+
Merged-chr8-126145481-1	chr8	126145381	126145581	+
Merged-chr8-126145907-1	chr8	126145807	126146007	+
Merged-chr8-126147552-1	chr8	126147452	126147652	+
Merged-chr8-126278137-1	chr8	126278037	126278237	+
Merged-chr8-126415220-1	chr8	126415120	126415320	+
Merged-chr8-126616972-1	chr8	126616872	126617072	+
Merged-chr8-126797258-1	chr8	126797158	126797358	+
Merged-chr8-126871191-1	chr8	126871091	126871291	+
Merged-chr8-126946287-1	chr8	126946187	126946387	+
Merged-chr8-127860178-1	chr8	127860078	127860278	+
Merged-chr8-128599456-1	chr8	128599356	128599556	+
Merged-chr8-129860000-1	chr8	129859900	129860100	+
Merged-chr4-46449166-1	chr4	46449066	46449266	+
Merged-chr18-60692778-1	chr18	60692678	60692878	+
Merged-chr18-61008122-1	chr18	61008022	61008222	+
Merged-chr18-61018987-1	chr18	61018887	61019087	+
Merged-chr18-61300976-1	chr18	61300876	61301076	+
Merged-chr4-47390837-1	chr4	47390737	47390937	+
Merged-chr4-48699694-1	chr4	48699594	48699794	+
Merged-chr4-50728178-1	chr4	50728078	50728278	+
Merged-chr4-51113164-1	chr4	51113064	51113264	+
Merged-chr4-51825474-1	chr4	51825374	51825574	+
Merged-chr18-65445997-1	chr18	65445897	65446097	+
Merged-chr18-65561192-1	chr18	65561092	65561292	+
Merged-chr4-52203662-1	chr4	52203562	52203762	+
Merged-chr4-52904805-1	chr4	52904705	52904905	+
Merged-chr18-65759825-1	chr18	65759725	65759925	+
Merged-chr18-66913787-1	chr18	66913687	66913887	+
Merged-chr4-53964760-1	chr4	53964660	53964860	+
Merged-chr4-54939659-1	chr4	54939559	54939759	+
Merged-chr4-55012608-1	chr4	55012508	55012708	+
Merged-chr4-55015812-1	chr4	55015712	55015912	+
Merged-chr18-67596017-1	chr18	67595917	67596117	+
Merged-chr18-70717133-1	chr18	70717033	70717233	+
Merged-chr4-56409383-1	chr4	56409283	56409483	+
Merged-chr4-57425541-1	chr4	57425441	57425641	+
Merged-chr18-71241524-1	chr18	71241424	71241624	+
Merged-chr18-71242151-1	chr18	71242051	71242251	+
Merged-chr18-71799443-1	chr18	71799343	71799543	+
Merged-chr18-74367887-1	chr18	74367787	74367987	+
Merged-chr4-60094687-1	chr4	60094587	60094787	+
Merged-chr18-75875926-1	chr18	75875826	75876026	+
Merged-chr4-60145992-1	chr4	60145892	60146092	+
Merged-chr4-60147675-1	chr4	60147575	60147775	+
Merged-chr4-60420367-1	chr4	60420267	60420467	+
Merged-chr4-60670113-1	chr4	60670013	60670213	+
Merged-chr4-60696552-1	chr4	60696452	60696652	+
Merged-chr4-61175489-1	chr4	61175389	61175589	+
Merged-chr4-61233134-1	chr4	61233034	61233234	+
Merged-chr4-61323476-1	chr4	61323376	61323576	+
Merged-chr4-61332532-1	chr4	61332432	61332632	+
Merged-chr18-77725768-1	chr18	77725668	77725868	+
Merged-chr18-77952829-1	chr18	77952729	77952929	+
Merged-chr18-79907498-1	chr18	79907398	79907598	+
Merged-chr4-61394267-1	chr4	61394167	61394367	+
Merged-chr4-61438103-1	chr4	61438003	61438203	+
Merged-chr4-61443645-1	chr4	61443545	61443745	+
Merged-chr4-61799636-1	chr4	61799536	61799736	+
Merged-chr18-80521516-1	chr18	80521416	80521616	+
Merged-chr18-83132130-1	chr18	83132030	83132230	+
Merged-chr18-85103186-1	chr18	85103086	85103286	+
Merged-chr18-85103961-1	chr18	85103861	85104061	+
Merged-chr18-85672702-1	chr18	85672602	85672802	+
Merged-chr18-86041994-1	chr18	86041894	86042094	+
Merged-chr18-86125927-1	chr18	86125827	86126027	+
Merged-chr18-86485876-1	chr18	86485776	86485976	+
Merged-chr18-88672855-1	chr18	88672755	88672955	+
Merged-chr4-66612664-1	chr4	66612564	66612764	+
Merged-chr4-67777530-1	chr4	67777430	67777630	+
Merged-chr4-69451489-1	chr4	69451389	69451589	+
Merged-chr4-71625579-1	chr4	71625479	71625679	+
Merged-chr18-90009768-1	chr18	90009668	90009868	+
Merged-chr19-3223891-1	chr19	3223791	3223991	+
Merged-chr19-3747552-1	chr19	3747452	3747652	+
Merged-chr19-3988991-1	chr19	3988891	3989091	+
Merged-chr12-73879353-1	chr12	73879253	73879453	+
Merged-chr12-74224657-1	chr12	74224557	74224757	+
Merged-chr12-75666052-1	chr12	75665952	75666152	+
Merged-chr12-77278024-1	chr12	77277924	77278124	+
Merged-chr12-77328717-1	chr12	77328617	77328817	+
Merged-chr12-77329719-1	chr12	77329619	77329819	+
Merged-chr12-80159851-1	chr12	80159751	80159951	+
Merged-chr12-81247705-1	chr12	81247605	81247805	+
Merged-chr12-81419934-1	chr12	81419834	81420034	+
Merged-chr12-81525205-1	chr12	81525105	81525305	+
Merged-chr12-85579612-1	chr12	85579512	85579712	+
Merged-chr12-86879002-1	chr12	86878902	86879102	+
Merged-chr12-87522513-1	chr12	87522413	87522613	+
Merged-chr12-87537726-1	chr12	87537626	87537826	+
Merged-chr10-7593396-1	chr10	7593296	7593496	+
Merged-chr10-7616812-1	chr10	7616712	7616912	+
Merged-chr10-8119307-1	chr10	8119207	8119407	+
Merged-chr10-8560481-1	chr10	8560381	8560581	+
Merged-chr10-8561150-1	chr10	8561050	8561250	+
Merged-chr10-10486223-1	chr10	10486123	10486323	+
Merged-chr10-11212048-1	chr10	11211948	11212148	+
Merged-chr12-92466545-1	chr12	92466445	92466645	+
Merged-chr12-94343179-1	chr12	94343079	94343279	+
Merged-chr12-94916989-1	chr12	94916889	94917089	+
Merged-chr10-11621398-1	chr10	11621298	11621498	+
Merged-chr10-12328688-1	chr10	12328588	12328788	+
Merged-chr10-12951933-1	chr10	12951833	12952033	+
Merged-chr12-101348353-1	chr12	101348253	101348453	+
Merged-chr12-102687077-1	chr12	102686977	102687177	+
Merged-chr10-14303790-1	chr10	14303690	14303890	+
Merged-chr10-14333101-1	chr10	14333001	14333201	+
Merged-chr10-15080272-1	chr10	15080172	15080372	+
Merged-chr10-15462685-1	chr10	15462585	15462785	+
Merged-chr10-17589972-1	chr10	17589872	17590072	+
Merged-chr12-104857663-1	chr12	104857563	104857763	+
Merged-chr12-105037793-1	chr12	105037693	105037893	+
Merged-chr12-105519753-1	chr12	105519653	105519853	+
Merged-chr12-106905924-1	chr12	106905824	106906024	+
Merged-chr10-18189553-1	chr10	18189453	18189653	+
Merged-chr10-19317124-1	chr10	19317024	19317224	+
Merged-chr10-19521168-1	chr10	19521068	19521268	+
Merged-chr10-20145334-1	chr10	20145234	20145434	+
Merged-chr10-22288702-1	chr10	22288602	22288802	+
Merged-chr10-22409388-1	chr10	22409288	22409488	+
Merged-chr10-22482472-1	chr10	22482372	22482572	+
Merged-chr10-24310511-1	chr10	24310411	24310611	+
Merged-chr10-24335815-1	chr10	24335715	24335915	+
Merged-chr10-24525083-1	chr10	24524983	24525183	+
Merged-chr10-24525711-1	chr10	24525611	24525811	+
Merged-chr10-24578847-1	chr10	24578747	24578947	+
Merged-chr10-25208467-1	chr10	25208367	25208567	+
Merged-chr10-25478970-1	chr10	25478870	25479070	+
Merged-chr10-25622676-1	chr10	25622576	25622776	+
Merged-chr10-25689406-1	chr10	25689306	25689506	+
Merged-chr8-130757192-1	chr8	130757092	130757292	+
Merged-chr8-131154743-1	chr8	131154643	131154843	+
Merged-chr8-131337697-1	chr8	131337597	131337797	+
Merged-chr8-131621928-1	chr8	131621828	131622028	+
Merged-chr8_random-16827-1	chr8_random	16727	16927	+
Merged-chr8_random-126609-1	chr8_random	126509	126709	+
Merged-chr9-4241235-1	chr9	4241135	4241335	+
Merged-chr9-4244608-1	chr9	4244508	4244708	+
Merged-chr9-5494629-1	chr9	5494529	5494729	+
Merged-chr9-6747464-1	chr9	6747364	6747564	+
Merged-chr9-7375038-1	chr9	7374938	7375138	+
Merged-chr9-7426613-1	chr9	7426513	7426713	+
Merged-chr9-7799268-1	chr9	7799168	7799368	+
Merged-chr9-7800577-1	chr9	7800477	7800677	+
Merged-chr9-8276410-1	chr9	8276310	8276510	+
Merged-chr9-8276955-1	chr9	8276855	8277055	+
Merged-chr9-8628754-1	chr9	8628654	8628854	+
Merged-chr9-9871183-1	chr9	9871083	9871283	+
Merged-chr9-10198308-1	chr9	10198208	10198408	+
Merged-chr9-11107419-1	chr9	11107319	11107519	+
Merged-chr9-11633030-1	chr9	11632930	11633130	+
Merged-chr9-11793404-1	chr9	11793304	11793504	+
Merged-chr9-12026229-1	chr9	12026129	12026329	+
Merged-chr9-12445263-1	chr9	12445163	12445363	+
Merged-chr9-13568600-1	chr9	13568500	13568700	+
Merged-chr9-15115420-1	chr9	15115320	15115520	+
Merged-chr9-17610587-1	chr9	17610487	17610687	+
Merged-chr9-17998074-1	chr9	17997974	17998174	+
Merged-chr9-18852768-1	chr9	18852668	18852868	+
Merged-chr19-7843464-1	chr19	7843364	7843564	+
Merged-chr19-9780351-1	chr19	9780251	9780451	+
Merged-chr19-9873870-1	chr19	9873770	9873970	+
Merged-chr19-10279329-1	chr19	10279229	10279429	+
Merged-chr19-12085590-1	chr19	12085490	12085690	+
Merged-chr19-12086144-1	chr19	12086044	12086244	+
Merged-chr19-12292800-1	chr19	12292700	12292900	+
Merged-chr19-12436852-1	chr19	12436752	12436952	+
Merged-chr19-13270687-1	chr19	13270587	13270787	+
Merged-chr19-13341167-1	chr19	13341067	13341267	+
Merged-chr19-15337276-1	chr19	15337176	15337376	+
Merged-chr19-17237277-1	chr19	17237177	17237377	+
Merged-chr19-20218950-1	chr19	20218850	20219050	+
Merged-chr19-20533039-1	chr19	20532939	20533139	+
Merged-chr19-20998695-1	chr19	20998595	20998795	+
Merged-chr19-23162203-1	chr19	23162103	23162303	+
Merged-chr19-23781027-1	chr19	23780927	23781127	+
Merged-chr19-25562770-1	chr19	25562670	25562870	+
Merged-chr19-32208077-1	chr19	32207977	32208177	+
Merged-chr19-33515238-1	chr19	33515138	33515338	+
Merged-chr19-34206140-1	chr19	34206040	34206240	+
Merged-chr19-34859091-1	chr19	34858991	34859191	+
Merged-chr19-35166801-1	chr19	35166701	35166901	+
Merged-chr19-36625093-1	chr19	36624993	36625193	+
Merged-chr19-38298754-1	chr19	38298654	38298854	+
Merged-chr10-32488198-1	chr10	32488098	32488298	+
Merged-chr10-32678224-1	chr10	32678124	32678324	+
Merged-chr10-33602399-1	chr10	33602299	33602499	+
Merged-chr10-34154978-1	chr10	34154878	34155078	+
Merged-chr10-34641846-1	chr10	34641746	34641946	+
Merged-chr10-35224789-1	chr10	35224689	35224889	+
Merged-chr10-37701641-1	chr10	37701541	37701741	+
Merged-chr10-38853677-1	chr10	38853577	38853777	+
Merged-chr10-43158728-1	chr10	43158628	43158828	+
Merged-chr10-43464436-1	chr10	43464336	43464536	+
Merged-chr10-44528202-1	chr10	44528102	44528302	+
Merged-chr10-45279622-1	chr10	45279522	45279722	+
Merged-chr10-48715279-1	chr10	48715179	48715379	+
Merged-chr10-49175141-1	chr10	49175041	49175241	+
Merged-chr10-50211708-1	chr10	50211608	50211808	+
Merged-chr10-52005468-1	chr10	52005368	52005568	+
Merged-chr10-54409979-1	chr10	54409879	54410079	+
Merged-chr10-57688265-1	chr10	57688165	57688365	+
Merged-chr10-57695475-1	chr10	57695375	57695575	+
Merged-chr10-57958635-1	chr10	57958535	57958735	+
Merged-chr10-58845484-1	chr10	58845384	58845584	+
Merged-chr9-20661764-1	chr9	20661664	20661864	+
Merged-chr9-21684107-1	chr9	21684007	21684207	+
Merged-chr9-21943970-1	chr9	21943870	21944070	+
Merged-chr9-21987909-1	chr9	21987809	21988009	+
Merged-chr9-22537265-1	chr9	22537165	22537365	+
Merged-chr9-22661730-1	chr9	22661630	22661830	+
Merged-chr9-25407566-1	chr9	25407466	25407666	+
Merged-chr9-25663788-1	chr9	25663688	25663888	+
Merged-chr9-25732155-1	chr9	25732055	25732255	+
Merged-chr9-27605185-1	chr9	27605085	27605285	+
Merged-chr9-27782444-1	chr9	27782344	27782544	+
Merged-chr9-28013332-1	chr9	28013232	28013432	+
Merged-chr9-30092984-1	chr9	30092884	30093084	+
Merged-chr9-30456236-1	chr9	30456136	30456336	+
Merged-chr9-31519924-1	chr9	31519824	31520024	+
Merged-chr9-32761121-1	chr9	32761021	32761221	+
Merged-chr9-32951805-1	chr9	32951705	32951905	+
Merged-chr9-33026880-1	chr9	33026780	33026980	+
Merged-chr9-35896468-1	chr9	35896368	35896568	+
Merged-chr9-35959164-1	chr9	35959064	35959264	+
Merged-chr9-37119556-1	chr9	37119456	37119656	+
Merged-chr9-37145119-1	chr9	37145019	37145219	+
Merged-chr9-37293034-1	chr9	37292934	37293134	+
Merged-chr9-39224232-1	chr9	39224132	39224332	+
Merged-chr9-40024497-1	chr9	40024397	40024597	+
Merged-chr9-40119630-1	chr9	40119530	40119730	+
Merged-chr9-42352886-1	chr9	42352786	42352986	+
Merged-chr9-42567997-1	chr9	42567897	42568097	+
Merged-chr9-46157244-1	chr9	46157144	46157344	+
Merged-chr9-46679548-1	chr9	46679448	46679648	+
Merged-chr9-47304625-1	chr9	47304525	47304725	+
Merged-chr9-50187137-1	chr9	50187037	50187237	+
Merged-chr9-50248488-1	chr9	50248388	50248588	+
Merged-chr19-39462153-1	chr19	39462053	39462253	+
Merged-chr19-39680609-1	chr19	39680509	39680709	+
Merged-chr19-42384082-1	chr19	42383982	42384182	+
Merged-chr19-42422226-1	chr19	42422126	42422326	+
Merged-chr19-44355631-1	chr19	44355531	44355731	+
Merged-chr19-45263614-1	chr19	45263514	45263714	+
Merged-chr19-45886485-1	chr19	45886385	45886585	+
Merged-chr19-47854782-1	chr19	47854682	47854882	+
Merged-chr19-49326245-1	chr19	49326145	49326345	+
Merged-chr19-50188407-1	chr19	50188307	50188507	+
Merged-chr19-50675416-1	chr19	50675316	50675516	+
Merged-chr19-51521687-1	chr19	51521587	51521787	+
Merged-chr19-51636224-1	chr19	51636124	51636324	+
Merged-chr19-52559751-1	chr19	52559651	52559851	+
Merged-chr19-53003019-1	chr19	53002919	53003119	+
Merged-chr19-53460322-1	chr19	53460222	53460422	+
Merged-chr19-53506931-1	chr19	53506831	53507031	+
Merged-chr19-53746225-1	chr19	53746125	53746325	+
Merged-chr19-53764079-1	chr19	53763979	53764179	+
Merged-chr19-53815341-1	chr19	53815241	53815441	+
Merged-chr19-54967348-1	chr19	54967248	54967448	+
Merged-chr19-55070872-1	chr19	55070772	55070972	+
Merged-chr19-55618024-1	chr19	55617924	55618124	+
Merged-chr19-55630912-1	chr19	55630812	55631012	+
Merged-chr19-57839367-1	chr19	57839267	57839467	+
Merged-chr19-58188009-1	chr19	58187909	58188109	+
Merged-chr19-58669842-1	chr19	58669742	58669942	+
Merged-chr19-59421590-1	chr19	59421490	59421690	+
Merged-chr19-59995500-1	chr19	59995400	59995600	+
Merged-chr1_random-497990-1	chr1_random	497890	498090	+
Merged-chr1_random-627916-1	chr1_random	627816	628016	+
Merged-chr1_random-915176-1	chr1_random	915076	915276	+
Merged-chr1_random-991590-1	chr1_random	991490	991690	+
Merged-chr1_random-993438-1	chr1_random	993338	993538	+
Merged-chr1_random-1012175-1	chr1_random	1012075	1012275	+
Merged-chr10-59712970-1	chr10	59712870	59713070	+
Merged-chr10-60238390-1	chr10	60238290	60238490	+
Merged-chr10-60596437-1	chr10	60596337	60596537	+
Merged-chr10-60596982-1	chr10	60596882	60597082	+
Merged-chr10-60878843-1	chr10	60878743	60878943	+
Merged-chr10-61831866-1	chr10	61831766	61831966	+
Merged-chr10-62572268-1	chr10	62572168	62572368	+
Merged-chr10-62585170-1	chr10	62585070	62585270	+
Merged-chr10-62679765-1	chr10	62679665	62679865	+
Merged-chr10-64213710-1	chr10	64213610	64213810	+
Merged-chr10-65772901-1	chr10	65772801	65773001	+
Merged-chr10-66045616-1	chr10	66045516	66045716	+
Merged-chr10-66466088-1	chr10	66465988	66466188	+
Merged-chr10-67374221-1	chr10	67374121	67374321	+
Merged-chr10-67599105-1	chr10	67599005	67599205	+
Merged-chr10-67600435-1	chr10	67600335	67600535	+
Merged-chr10-68863671-1	chr10	68863571	68863771	+
Merged-chr10-68994949-1	chr10	68994849	68995049	+
Merged-chr10-70866594-1	chr10	70866494	70866694	+
Merged-chr10-73319541-1	chr10	73319441	73319641	+
Merged-chr10-74177558-1	chr10	74177458	74177658	+
Merged-chr10-74182905-1	chr10	74182805	74183005	+
Merged-chr10-74355497-1	chr10	74355397	74355597	+
Merged-chr10-74692766-1	chr10	74692666	74692866	+
Merged-chr10-75481879-1	chr10	75481779	75481979	+
Merged-chr10-77042803-1	chr10	77042703	77042903	+
Merged-chr10-77722613-1	chr10	77722513	77722713	+
Merged-chr10-79246029-1	chr10	79245929	79246129	+
Merged-chr10-79370930-1	chr10	79370830	79371030	+
Merged-chr10-81278265-1	chr10	81278165	81278365	+
Merged-chr9-52494553-1	chr9	52494453	52494653	+
Merged-chr6-46629280-1	chr6	46629180	46629380	+
Merged-chr6-47609255-1	chr6	47609155	47609355	+
Merged-chr6-47702911-1	chr6	47702811	47703011	+
Merged-chr6-47722209-1	chr6	47722109	47722309	+
Merged-chr6-47722902-1	chr6	47722802	47723002	+
Merged-chr9-56061307-1	chr9	56061207	56061407	+
Merged-chr9-56758003-1	chr9	56757903	56758103	+
Merged-chr9-57358583-1	chr9	57358483	57358683	+
Merged-chr9-57503777-1	chr9	57503677	57503877	+
Merged-chr6-49345378-1	chr6	49345278	49345478	+
Merged-chr6-50449210-1	chr6	50449110	50449310	+
Merged-chr9-58129112-1	chr9	58129012	58129212	+
Merged-chr9-58405111-1	chr9	58405011	58405211	+
Merged-chr9-60580060-1	chr9	60579960	60580160	+
Merged-chr6-53509593-1	chr6	53509493	53509693	+
Merged-chr9-61108025-1	chr9	61107925	61108125	+
Merged-chr9-61134283-1	chr9	61134183	61134383	+
Merged-chr9-61445385-1	chr9	61445285	61445485	+
Merged-chr6-55660939-1	chr6	55660839	55661039	+
Merged-chr6-57651959-1	chr6	57651859	57652059	+
Merged-chr6-59537449-1	chr6	59537349	59537549	+
Merged-chr6-59836565-1	chr6	59836465	59836665	+
Merged-chr9-63765855-1	chr9	63765755	63765955	+
Merged-chr9-64237653-1	chr9	64237553	64237753	+
Merged-chr6-61288124-1	chr6	61288024	61288224	+
Merged-chr6-63009264-1	chr6	63009164	63009364	+
Merged-chr6-64967221-1	chr6	64967121	64967321	+
Merged-chr9-67735305-1	chr9	67735205	67735405	+
Merged-chr9-68369304-1	chr9	68369204	68369404	+
Merged-chr6-67737590-1	chr6	67737490	67737690	+
Merged-chr9-70005606-1	chr9	70005506	70005706	+
Merged-chr9-70256818-1	chr9	70256718	70256918	+
Merged-chr6-67961970-1	chr6	67961870	67962070	+
Merged-chr6-69428599-1	chr6	69428499	69428699	+
Merged-chr6-70053439-1	chr6	70053339	70053539	+
Merged-chr6-70053987-1	chr6	70053887	70054087	+
Merged-chr9-72097453-1	chr9	72097353	72097553	+
Merged-chr9-72961091-1	chr9	72960991	72961191	+
Merged-chr6-70829419-1	chr6	70829319	70829519	+
Merged-chr6-71429431-1	chr6	71429331	71429531	+
Merged-chr6-71563843-1	chr6	71563743	71563943	+
Merged-chr6-71583153-1	chr6	71583053	71583253	+
Merged-chr6-71773703-1	chr6	71773603	71773803	+
Merged-chr9-73748631-1	chr9	73748531	73748731	+
Merged-chr9-74173679-1	chr9	74173579	74173779	+
Merged-chr9-75315294-1	chr9	75315194	75315394	+
Merged-chr9-75537938-1	chr9	75537838	75538038	+
Merged-chr9-75579022-1	chr9	75578922	75579122	+
Merged-chr6-72744789-1	chr6	72744689	72744889	+
Merged-chr6-72758531-1	chr6	72758431	72758631	+
Merged-chr6-73792488-1	chr6	73792388	73792588	+
Merged-chr6-74215707-1	chr6	74215607	74215807	+
Merged-chr9-77976485-1	chr9	77976385	77976585	+
Merged-chr9-78375195-1	chr9	78375095	78375295	+
Merged-chr6-77554188-1	chr6	77554088	77554288	+
Merged-chr6-78984692-1	chr6	78984592	78984792	+
Merged-chr6-81089484-1	chr6	81089384	81089584	+
Merged-chr6-81225313-1	chr6	81225213	81225413	+
Merged-chr6-81231261-1	chr6	81231161	81231361	+
Merged-chr2-3401101-1	chr2	3401001	3401201	+
Merged-chr2-3891498-1	chr2	3891398	3891598	+
Merged-chr14-117685232-1	chr14	117685132	117685332	+
Merged-chr14-117690724-1	chr14	117690624	117690824	+
Merged-chr14-118043734-1	chr14	118043634	118043834	+
Merged-chr14-118288662-1	chr14	118288562	118288762	+
Merged-chr14-118782035-1	chr14	118781935	118782135	+
Merged-chr14-119072353-1	chr14	119072253	119072453	+
Merged-chr2-7326202-1	chr2	7326102	7326302	+
Merged-chr2-8054126-1	chr2	8054026	8054226	+
Merged-chr2-8284083-1	chr2	8283983	8284183	+
Merged-chr14-119436471-1	chr14	119436371	119436571	+
Merged-chr14-120061886-1	chr14	120061786	120061986	+
Merged-chr14-120317927-1	chr14	120317827	120318027	+
Merged-chr14-120534199-1	chr14	120534099	120534299	+
Merged-chr2-9801018-1	chr2	9800918	9801118	+
Merged-chr2-10025754-1	chr2	10025654	10025854	+
Merged-chr2-11638946-1	chr2	11638846	11639046	+
Merged-chr14-121281067-1	chr14	121280967	121281167	+
Merged-chr14-121379005-1	chr14	121378905	121379105	+
Merged-chr14-121465740-1	chr14	121465640	121465840	+
Merged-chr14-122626176-1	chr14	122626076	122626276	+
Merged-chr2-14248415-1	chr2	14248315	14248515	+
Merged-chr2-15121056-1	chr2	15120956	15121156	+
Merged-chr2-15122139-1	chr2	15122039	15122239	+
Merged-chr14-122862337-1	chr14	122862237	122862437	+
Merged-chr14-123759903-1	chr14	123759803	123760003	+
Merged-chr14-124768958-1	chr14	124768858	124769058	+
Merged-chr15-3019360-1	chr15	3019260	3019460	+
Merged-chr2-15355015-1	chr2	15354915	15355115	+
Merged-chr2-17081712-1	chr2	17081612	17081812	+
Merged-chr2-17673154-1	chr2	17673054	17673254	+
Merged-chr15-3945802-1	chr15	3945702	3945902	+
Merged-chr15-3946075-1	chr15	3945975	3946175	+
Merged-chr2-19383734-1	chr2	19383634	19383834	+
Merged-chr15-5329437-1	chr15	5329337	5329537	+
Merged-chr15-5782086-1	chr15	5781986	5782186	+
Merged-chr15-6177555-1	chr15	6177455	6177655	+
Merged-chr15-6650311-1	chr15	6650211	6650411	+
Merged-chr15-6752268-1	chr15	6752168	6752368	+
Merged-chr2-20625543-1	chr2	20625443	20625643	+
Merged-chr15-6755496-1	chr15	6755396	6755596	+
Merged-chr15-7213991-1	chr15	7213891	7214091	+
Merged-chr2-21743392-1	chr2	21743292	21743492	+
Merged-chr2-22084904-1	chr2	22084804	22085004	+
Merged-chr2-22858727-1	chr2	22858627	22858827	+
Merged-chr15-10416222-1	chr15	10416122	10416322	+
Merged-chr2-24049158-1	chr2	24049058	24049258	+
Merged-chr2-24360701-1	chr2	24360601	24360801	+
Merged-chr2-26191065-1	chr2	26190965	26191165	+
Merged-chr2-26299391-1	chr2	26299291	26299491	+
Merged-chr15-12669900-1	chr15	12669800	12670000	+
Merged-chr2-26737099-1	chr2	26736999	26737199	+
Merged-chr2-28958495-1	chr2	28958395	28958595	+
Merged-chr15-16109123-1	chr15	16109023	16109223	+
Merged-chr9-78961724-1	chr9	78961624	78961824	+
Merged-chr9-79900094-1	chr9	79899994	79900194	+
Merged-chr9-80234006-1	chr9	80233906	80234106	+
Merged-chr9-81806034-1	chr9	81805934	81806134	+
Merged-chr9-83281813-1	chr9	83281713	83281913	+
Merged-chr9-84782799-1	chr9	84782699	84782899	+
Merged-chr6-86476683-1	chr6	86476583	86476783	+
Merged-chr6-86512739-1	chr6	86512639	86512839	+
Merged-chr9-86994088-1	chr9	86993988	86994188	+
Merged-chr9-87483012-1	chr9	87482912	87483112	+
Merged-chr6-87355479-1	chr6	87355379	87355579	+
Merged-chr6-88414649-1	chr6	88414549	88414749	+
Merged-chr6-88517812-1	chr6	88517712	88517912	+
Merged-chr9-89004436-1	chr9	89004336	89004536	+
Merged-chr9-90027772-1	chr9	90027672	90027872	+
Merged-chr9-90728709-1	chr9	90728609	90728809	+
Merged-chr9-90757452-1	chr9	90757352	90757552	+
Merged-chr6-88518814-1	chr6	88518714	88518914	+
Merged-chr6-90163237-1	chr6	90163137	90163337	+
Merged-chr6-90392928-1	chr6	90392828	90393028	+
Merged-chr6-90556826-1	chr6	90556726	90556926	+
Merged-chr6-90964708-1	chr6	90964608	90964808	+
Merged-chr6-91612496-1	chr6	91612396	91612596	+
Merged-chr9-93539549-1	chr9	93539449	93539649	+
Merged-chr9-93544836-1	chr9	93544736	93544936	+
Merged-chr9-97798691-1	chr9	97798591	97798791	+
Merged-chr9-98582982-1	chr9	98582882	98583082	+
Merged-chr9-99277634-1	chr9	99277534	99277734	+
Merged-chr6-93872938-1	chr6	93872838	93873038	+
Merged-chr6-94284116-1	chr6	94284016	94284216	+
Merged-chr6-95729432-1	chr6	95729332	95729532	+
Merged-chr6-96429536-1	chr6	96429436	96429636	+
Merged-chr6-97051828-1	chr6	97051728	97051928	+
Merged-chr9-100346380-1	chr9	100346280	100346480	+
Merged-chr9-101055781-1	chr9	101055681	101055881	+
Merged-chr9-101288125-1	chr9	101288025	101288225	+
Merged-chr6-97329279-1	chr6	97329179	97329379	+
Merged-chr6-97598302-1	chr6	97598202	97598402	+
Merged-chr6-97599266-1	chr6	97599166	97599366	+
Merged-chr9-102915925-1	chr9	102915825	102916025	+
Merged-chr6-100301328-1	chr6	100301228	100301428	+
Merged-chr9-106070030-1	chr9	106069930	106070130	+
Merged-chr9-107252208-1	chr9	107252108	107252308	+
Merged-chr9-107579990-1	chr9	107579890	107580090	+
Merged-chr6-100328931-1	chr6	100328831	100329031	+
Merged-chr6-100352226-1	chr6	100352126	100352326	+
Merged-chr6-102485065-1	chr6	102484965	102485165	+
Merged-chr9-108008623-1	chr9	108008523	108008723	+
Merged-chr9-108476368-1	chr9	108476268	108476468	+
Merged-chr9-110203976-1	chr9	110203876	110204076	+
Merged-chr6-105440942-1	chr6	105440842	105441042	+
Merged-chr6-106351432-1	chr6	106351332	106351532	+
Merged-chr6-107542211-1	chr6	107542111	107542311	+
Merged-chr2-29555743-1	chr2	29555643	29555843	+
Merged-chr15-22681750-1	chr15	22681650	22681850	+
Merged-chr15-22866262-1	chr15	22866162	22866362	+
Merged-chr15-23857550-1	chr15	23857450	23857650	+
Merged-chr2-29917594-1	chr2	29917494	29917694	+
Merged-chr2-29989333-1	chr2	29989233	29989433	+
Merged-chr15-24251331-1	chr15	24251231	24251431	+
Merged-chr15-24983566-1	chr15	24983466	24983666	+
Merged-chr15-25124844-1	chr15	25124744	25124944	+
Merged-chr15-25307032-1	chr15	25306932	25307132	+
Merged-chr15-25683928-1	chr15	25683828	25684028	+
Merged-chr15-26837658-1	chr15	26837558	26837758	+
Merged-chr2-30040463-1	chr2	30040363	30040563	+
Merged-chr2-30074441-1	chr2	30074341	30074541	+
Merged-chr2-30075028-1	chr2	30074928	30075128	+
Merged-chr2-30608406-1	chr2	30608306	30608506	+
Merged-chr15-27668226-1	chr15	27668126	27668326	+
Merged-chr15-28499594-1	chr15	28499494	28499694	+
Merged-chr15-30024419-1	chr15	30024319	30024519	+
Merged-chr15-31485259-1	chr15	31485159	31485359	+
Merged-chr15-31516411-1	chr15	31516311	31516511	+
Merged-chr2-32873770-1	chr2	32873670	32873870	+
Merged-chr2-33295209-1	chr2	33295109	33295309	+
Merged-chr15-36360676-1	chr15	36360576	36360776	+
Merged-chr15-36384920-1	chr15	36384820	36385020	+
Merged-chr2-35362925-1	chr2	35362825	35363025	+
Merged-chr2-35645109-1	chr2	35645009	35645209	+
Merged-chr2-36155559-1	chr2	36155459	36155659	+
Merged-chr15-36707856-1	chr15	36707756	36707956	+
Merged-chr15-36937993-1	chr15	36937893	36938093	+
Merged-chr15-37011904-1	chr15	37011804	37012004	+
Merged-chr15-38394148-1	chr15	38394048	38394248	+
Merged-chr2-36766640-1	chr2	36766540	36766740	+
Merged-chr2-37705583-1	chr2	37705483	37705683	+
Merged-chr2-38673237-1	chr2	38673137	38673337	+
Merged-chr2-39639463-1	chr2	39639363	39639563	+
Merged-chr15-39005076-1	chr15	39004976	39005176	+
Merged-chr2-41601551-1	chr2	41601451	41601651	+
Merged-chr2-42863164-1	chr2	42863064	42863264	+
Merged-chr2-42907069-1	chr2	42906969	42907169	+
Merged-chr2-44635511-1	chr2	44635411	44635611	+
Merged-chr15-39692912-1	chr15	39692812	39693012	+
Merged-chr15-40458183-1	chr15	40458083	40458283	+
Merged-chr2-47401852-1	chr2	47401752	47401952	+
Merged-chr2-47958571-1	chr2	47958471	47958671	+
Merged-chr15-46397938-1	chr15	46397838	46398038	+
Merged-chr15-49155599-1	chr15	49155499	49155699	+
Merged-chr2-51926930-1	chr2	51926830	51927030	+
Merged-chr2-51927782-1	chr2	51927682	51927882	+
Merged-chr2-54789938-1	chr2	54789838	54790038	+
Merged-chr2-55487986-1	chr2	55487886	55488086	+
Merged-chr2-57074829-1	chr2	57074729	57074929	+
Merged-chr15-53091044-1	chr15	53090944	53091144	+
Merged-chr15-55099698-1	chr15	55099598	55099798	+
Merged-chr9-110847039-1	chr9	110846939	110847139	+
Merged-chr6-108514496-1	chr6	108514396	108514596	+
Merged-chr6-108671251-1	chr6	108671151	108671351	+
Merged-chr6-109662952-1	chr6	109662852	109663052	+
Merged-chr9-114016476-1	chr9	114016376	114016576	+
Merged-chr9-114016953-1	chr9	114016853	114017053	+
Merged-chr9-114032417-1	chr9	114032317	114032517	+
Merged-chr6-111622874-1	chr6	111622774	111622974	+
Merged-chr6-112187678-1	chr6	112187578	112187778	+
Merged-chr6-113217157-1	chr6	113217057	113217257	+
Merged-chr9-116829066-1	chr9	116828966	116829166	+
Merged-chr9-117891993-1	chr9	117891893	117892093	+
Merged-chr9-118038504-1	chr9	118038404	118038604	+
Merged-chr9-118517927-1	chr9	118517827	118518027	+
Merged-chr6-114495776-1	chr6	114495676	114495876	+
Merged-chr6-114503836-1	chr6	114503736	114503936	+
Merged-chr6-114545948-1	chr6	114545848	114546048	+
Merged-chr6-114564639-1	chr6	114564539	114564739	+
Merged-chr9-119771698-1	chr9	119771598	119771798	+
Merged-chr9-119783952-1	chr9	119783852	119784052	+
Merged-chr9-120600699-1	chr9	120600599	120600799	+
Merged-chr9-121231638-1	chr9	121231538	121231738	+
Merged-chr9-121816678-1	chr9	121816578	121816778	+
Merged-chr6-117289485-1	chr6	117289385	117289585	+
Merged-chr6-118012427-1	chr6	118012327	118012527	+
Merged-chr6-118369473-1	chr6	118369373	118369573	+
Merged-chr6-119125287-1	chr6	119125187	119125387	+
Merged-chrUn_random-959431-1	chrUn_random	959331	959531	+
Merged-chrUn_random-1613605-1	chrUn_random	1613505	1613705	+
Merged-chrUn_random-2375675-1	chrUn_random	2375575	2375775	+
Merged-chr6-119432149-1	chr6	119432049	119432249	+
Merged-chrUn_random-2380491-1	chrUn_random	2380391	2380591	+
Merged-chrUn_random-2382759-1	chrUn_random	2382659	2382859	+
Merged-chrUn_random-2424624-1	chrUn_random	2424524	2424724	+
Merged-chrUn_random-2653633-1	chrUn_random	2653533	2653733	+
Merged-chrUn_random-2668030-1	chrUn_random	2667930	2668130	+
Merged-chrUn_random-3852220-1	chrUn_random	3852120	3852320	+
Merged-chrUn_random-4341234-1	chrUn_random	4341134	4341334	+
Merged-chrUn_random-4874091-1	chrUn_random	4873991	4874191	+
Merged-chr6-122679823-1	chr6	122679723	122679923	+
Merged-chr6-122845766-1	chr6	122845666	122845866	+
Merged-chr6-122981956-1	chr6	122981856	122982056	+
Merged-chrUn_random-5732063-1	chrUn_random	5731963	5732163	+
Merged-chrX-3237951-1	chrX	3237851	3238051	+
Merged-chrX-3373341-1	chrX	3373241	3373441	+
Merged-chrX-3438143-1	chrX	3438043	3438243	+
Merged-chrX-3499393-1	chrX	3499293	3499493	+
Merged-chrX-3567586-1	chrX	3567486	3567686	+
Merged-chr6-124901958-1	chr6	124901858	124902058	+
Merged-chr6-124924545-1	chr6	124924445	124924645	+
Merged-chr6-124958837-1	chr6	124958737	124958937	+
Merged-chrX-3831679-1	chrX	3831579	3831779	+
Merged-chrX-4251878-1	chrX	4251778	4251978	+
Merged-chrX-4685028-1	chrX	4684928	4685128	+
Merged-chrX-4702153-1	chrX	4702053	4702253	+
Merged-chr6-125397512-1	chr6	125397412	125397612	+
Merged-chr6-127466546-1	chr6	127466446	127466646	+
Merged-chrX-8100086-1	chrX	8099986	8100186	+
Merged-chrX-8947771-1	chrX	8947671	8947871	+
Merged-chrX-9222374-1	chrX	9222274	9222474	+
Merged-chr6-128233859-1	chr6	128233759	128233959	+
Merged-chr6-128395814-1	chr6	128395714	128395914	+
Merged-chr6-128861348-1	chr6	128861248	128861448	+
Merged-chrX-15918138-1	chrX	15918038	15918238	+
Merged-chrX-15919933-1	chrX	15919833	15920033	+
Merged-chrX-17077940-1	chrX	17077840	17078040	+
Merged-chr6-129892482-1	chr6	129892382	129892582	+
Merged-chr6-130953916-1	chr6	130953816	130954016	+
Merged-chr6-132408701-1	chr6	132408601	132408801	+
Merged-chr6-132409943-1	chr6	132409843	132410043	+
Merged-chr2-57465931-1	chr2	57465831	57466031	+
Merged-chr2-58194280-1	chr2	58194180	58194380	+
Merged-chr2-59309324-1	chr2	59309224	59309424	+
Merged-chr15-55706874-1	chr15	55706774	55706974	+
Merged-chr15-55707955-1	chr15	55707855	55708055	+
Merged-chr15-56014302-1	chr15	56014202	56014402	+
Merged-chr15-56292197-1	chr15	56292097	56292297	+
Merged-chr15-56318392-1	chr15	56318292	56318492	+
Merged-chr15-56520002-1	chr15	56519902	56520102	+
Merged-chr2-60826254-1	chr2	60826154	60826354	+
Merged-chr2-63320412-1	chr2	63320312	63320512	+
Merged-chr2-63676718-1	chr2	63676618	63676818	+
Merged-chr2-64719536-1	chr2	64719436	64719636	+
Merged-chr2-65278184-1	chr2	65278084	65278284	+
Merged-chr15-58562411-1	chr15	58562311	58562511	+
Merged-chr15-59702997-1	chr15	59702897	59703097	+
Merged-chr2-66027451-1	chr2	66027351	66027551	+
Merged-chr2-67661008-1	chr2	67660908	67661108	+
Merged-chr2-67947769-1	chr2	67947669	67947869	+
Merged-chr2-68136135-1	chr2	68136035	68136235	+
Merged-chr2-69385314-1	chr2	69385214	69385414	+
Merged-chr15-61938505-1	chr15	61938405	61938605	+
Merged-chr15-63622011-1	chr15	63621911	63622111	+
Merged-chr2-69723766-1	chr2	69723666	69723866	+
Merged-chr15-65818965-1	chr15	65818865	65819065	+
Merged-chr15-65878105-1	chr15	65878005	65878205	+
Merged-chr15-66757599-1	chr15	66757499	66757699	+
Merged-chr15-67869879-1	chr15	67869779	67869979	+
Merged-chr15-68810823-1	chr15	68810723	68810923	+
Merged-chr15-69466204-1	chr15	69466104	69466304	+
Merged-chr15-69986969-1	chr15	69986869	69987069	+
Merged-chr2-72353909-1	chr2	72353809	72354009	+
Merged-chr2-72659941-1	chr2	72659841	72660041	+
Merged-chr15-71066646-1	chr15	71066546	71066746	+
Merged-chr15-72380082-1	chr15	72379982	72380182	+
Merged-chr2-74208224-1	chr2	74208124	74208324	+
Merged-chr2-76513885-1	chr2	76513785	76513985	+
Merged-chr15-74483366-1	chr15	74483266	74483466	+
Merged-chr15-74522073-1	chr15	74521973	74522173	+
Merged-chr15-74522844-1	chr15	74522744	74522944	+
Merged-chr15-75112111-1	chr15	75112011	75112211	+
Merged-chr2-81350320-1	chr2	81350220	81350420	+
Merged-chr2-81635592-1	chr2	81635492	81635692	+
Merged-chr2-83564157-1	chr2	83564057	83564257	+
Merged-chr15-76799929-1	chr15	76799829	76800029	+
Merged-chr15-77016750-1	chr15	77016650	77016850	+
Merged-chr2-84346402-1	chr2	84346302	84346502	+
Merged-chr2-84429396-1	chr2	84429296	84429496	+
Merged-chr2-84948634-1	chr2	84948534	84948734	+
Merged-chr2-85859917-1	chr2	85859817	85860017	+
Merged-chr15-79721988-1	chr15	79721888	79722088	+
Merged-chr2-86206865-1	chr2	86206765	86206965	+
Merged-chr2-86207938-1	chr2	86207838	86208038	+
Merged-chr2-87436157-1	chr2	87436057	87436257	+
Merged-chr2-87775294-1	chr2	87775194	87775394	+
Merged-chr2-87856267-1	chr2	87856167	87856367	+
Merged-chr15-79913855-1	chr15	79913755	79913955	+
Merged-chr15-80050920-1	chr15	80050820	80051020	+
Merged-chr15-81481224-1	chr15	81481124	81481324	+
Merged-chr2-88437937-1	chr2	88437837	88438037	+
Merged-chr2-88454515-1	chr2	88454415	88454615	+
Merged-chr2-88625626-1	chr2	88625526	88625726	+
Merged-chr2-90036181-1	chr2	90036081	90036281	+
Merged-chr2-90088855-1	chr2	90088755	90088955	+
Merged-chr15-82426842-1	chr15	82426742	82426942	+
Merged-chr15-83904514-1	chr15	83904414	83904614	+
Merged-chr15-83923276-1	chr15	83923176	83923376	+
Merged-chrX-21201618-1	chrX	21201518	21201718	+
Merged-chr6-132917528-1	chr6	132917428	132917628	+
Merged-chr6-134847400-1	chr6	134847300	134847500	+
Merged-chrX-23826624-1	chrX	23826524	23826724	+
Merged-chrX-24861202-1	chrX	24861102	24861302	+
Merged-chrX-27139594-1	chrX	27139494	27139694	+
Merged-chrX-28146706-1	chrX	28146606	28146806	+
Merged-chrX-28147823-1	chrX	28147723	28147923	+
Merged-chrX-28833308-1	chrX	28833208	28833408	+
Merged-chrX-28892189-1	chrX	28892089	28892289	+
Merged-chr6-135607856-1	chr6	135607756	135607956	+
Merged-chr6-136431253-1	chr6	136431153	136431353	+
Merged-chr6-136476739-1	chr6	136476639	136476839	+
Merged-chr6-136617471-1	chr6	136617371	136617571	+
Merged-chr6-136618147-1	chr6	136618047	136618247	+
Merged-chr6-136752472-1	chr6	136752372	136752572	+
Merged-chrX-28893296-1	chrX	28893196	28893396	+
Merged-chrX-29138073-1	chrX	29137973	29138173	+
Merged-chrX-29182417-1	chrX	29182317	29182517	+
Merged-chrX-29498565-1	chrX	29498465	29498665	+
Merged-chrX-30139525-1	chrX	30139425	30139625	+
Merged-chrX-30144892-1	chrX	30144792	30144992	+
Merged-chrX-30295073-1	chrX	30294973	30295173	+
Merged-chrX-30466968-1	chrX	30466868	30467068	+
Merged-chr6-139086124-1	chr6	139086024	139086224	+
Merged-chr6-140274941-1	chr6	140274841	140275041	+
Merged-chr6-140677922-1	chr6	140677822	140678022	+
Merged-chrX-30558162-1	chrX	30558062	30558262	+
Merged-chrX-30803193-1	chrX	30803093	30803293	+
Merged-chrX-30805490-1	chrX	30805390	30805590	+
Merged-chrX-30806484-1	chrX	30806384	30806584	+
Merged-chrX-30812923-1	chrX	30812823	30813023	+
Merged-chrX-31370132-1	chrX	31370032	31370232	+
Merged-chrX-31450239-1	chrX	31450139	31450339	+
Merged-chrX-31464870-1	chrX	31464770	31464970	+
Merged-chr6-143090842-1	chr6	143090742	143090942	+
Merged-chrX-32134738-1	chrX	32134638	32134838	+
Merged-chrX-32159910-1	chrX	32159810	32160010	+
Merged-chrX-32579502-1	chrX	32579402	32579602	+
Merged-chrX-32944188-1	chrX	32944088	32944288	+
Merged-chrX-34670571-1	chrX	34670471	34670671	+
Merged-chr6-145224642-1	chr6	145224542	145224742	+
Merged-chr6-145225166-1	chr6	145225066	145225266	+
Merged-chr6-146583563-1	chr6	146583463	146583663	+
Merged-chr6-146643007-1	chr6	146642907	146643107	+
Merged-chr6-146659901-1	chr6	146659801	146660001	+
Merged-chr6-147856133-1	chr6	147856033	147856233	+
Merged-chrX-41369579-1	chrX	41369479	41369679	+
Merged-chrX-41397314-1	chrX	41397214	41397414	+
Merged-chrX-41602428-1	chrX	41602328	41602528	+
Merged-chrX-41774431-1	chrX	41774331	41774531	+
Merged-chr6-148904758-1	chr6	148904658	148904858	+
Merged-chr6-148905834-1	chr6	148905734	148905934	+
Merged-chr6-149218190-1	chr6	149218090	149218290	+
Merged-chr6-149224208-1	chr6	149224108	149224308	+
Merged-chrX-42596435-1	chrX	42596335	42596535	+
Merged-chr7-3213792-1	chr7	3213692	3213892	+
Merged-chrX-55460486-1	chrX	55460386	55460586	+
Merged-chrX-55616923-1	chrX	55616823	55617023	+
Merged-chrX-58981238-1	chrX	58981138	58981338	+
Merged-chrX-59497347-1	chrX	59497247	59497447	+
Merged-chr7-4894917-1	chr7	4894817	4895017	+
Merged-chr7-4999520-1	chr7	4999420	4999620	+
Merged-chr7-5003237-1	chr7	5003137	5003337	+
Merged-chrX-60119520-1	chrX	60119420	60119620	+
Merged-chrX-64012314-1	chrX	64012214	64012414	+
Merged-chrX-65286438-1	chrX	65286338	65286538	+
Merged-chrX-65652042-1	chrX	65651942	65652142	+
Merged-chr7-6210021-1	chr7	6209921	6210121	+
Merged-chr7-6317555-1	chr7	6317455	6317655	+
Merged-chr7-7356751-1	chr7	7356651	7356851	+
Merged-chr7-7384716-1	chr7	7384616	7384816	+
Merged-chr7-7501915-1	chr7	7501815	7502015	+
Merged-chrX-71932485-1	chrX	71932385	71932585	+
Merged-chrX-72995903-1	chrX	72995803	72996003	+
Merged-chr7-7763541-1	chr7	7763441	7763641	+
Merged-chr7-7938109-1	chr7	7938009	7938209	+
Merged-chr7-8363050-1	chr7	8362950	8363150	+
Merged-chr7-8535671-1	chr7	8535571	8535771	+
Merged-chr7-8722666-1	chr7	8722566	8722766	+
Merged-chr2-90202788-1	chr2	90202688	90202888	+
Merged-chr2-91023449-1	chr2	91023349	91023549	+
Merged-chr2-91803915-1	chr2	91803815	91804015	+
Merged-chr15-84863706-1	chr15	84863606	84863806	+
Merged-chr2-91933788-1	chr2	91933688	91933888	+
Merged-chr2-93896852-1	chr2	93896752	93896952	+
Merged-chr2-94230269-1	chr2	94230169	94230369	+
Merged-chr15-86052549-1	chr15	86052449	86052649	+
Merged-chr15-86147620-1	chr15	86147520	86147720	+
Merged-chr15-87798503-1	chr15	87798403	87798603	+
Merged-chr2-94446909-1	chr2	94446809	94447009	+
Merged-chr2-94648751-1	chr2	94648651	94648851	+
Merged-chr2-96038064-1	chr2	96037964	96038164	+
Merged-chr15-90336845-1	chr15	90336745	90336945	+
Merged-chr15-91250583-1	chr15	91250483	91250683	+
Merged-chr15-91483057-1	chr15	91482957	91483157	+
Merged-chr2-100993437-1	chr2	100993337	100993537	+
Merged-chr2-103753391-1	chr2	103753291	103753491	+
Merged-chr15-91738999-1	chr15	91738899	91739099	+
Merged-chr15-92558979-1	chr15	92558879	92559079	+
Merged-chr2-105398542-1	chr2	105398442	105398642	+
Merged-chr2-105686108-1	chr2	105686008	105686208	+
Merged-chr15-96294907-1	chr15	96294807	96295007	+
Merged-chr15-97349590-1	chr15	97349490	97349690	+
Merged-chr2-109118397-1	chr2	109118297	109118497	+
Merged-chr2-110861593-1	chr2	110861493	110861693	+
Merged-chr2-113384647-1	chr2	113384547	113384747	+
Merged-chr2-113697982-1	chr2	113697882	113698082	+
Merged-chr15-98635531-1	chr15	98635431	98635631	+
Merged-chr15-98930909-1	chr15	98930809	98931009	+
Merged-chr15-99180855-1	chr15	99180755	99180955	+
Merged-chr15-99208923-1	chr15	99208823	99209023	+
Merged-chr15-99535546-1	chr15	99535446	99535646	+
Merged-chr2-116315985-1	chr2	116315885	116316085	+
Merged-chr2-116505446-1	chr2	116505346	116505546	+
Merged-chr2-117075413-1	chr2	117075313	117075513	+
Merged-chr15-100098633-1	chr15	100098533	100098733	+
Merged-chr15-100102967-1	chr15	100102867	100103067	+
Merged-chr2-119289808-1	chr2	119289708	119289908	+
Merged-chr2-119372749-1	chr2	119372649	119372849	+
Merged-chr2-119594556-1	chr2	119594456	119594656	+
Merged-chr2-119683306-1	chr2	119683206	119683406	+
Merged-chr2-119699074-1	chr2	119698974	119699174	+
Merged-chr15-100584650-1	chr15	100584550	100584750	+
Merged-chr15-100812966-1	chr15	100812866	100813066	+
Merged-chr15-102506999-1	chr15	102506899	102507099	+
Merged-chr2-120048348-1	chr2	120048248	120048448	+
Merged-chr2-120645869-1	chr2	120645769	120645969	+
Merged-chr15-103426462-1	chr15	103426362	103426562	+
Merged-chr16-3041440-1	chr16	3041340	3041540	+
Merged-chr16-3045238-1	chr16	3045138	3045338	+
Merged-chr16-3174085-1	chr16	3173985	3174185	+
Merged-chr16-3344819-1	chr16	3344719	3344919	+
Merged-chr16-3519221-1	chr16	3519121	3519321	+
Merged-chr16-3908730-1	chr16	3908630	3908830	+
Merged-chr16-4749290-1	chr16	4749190	4749390	+
Merged-chr16-7972825-1	chr16	7972725	7972925	+
Merged-chr16-8039763-1	chr16	8039663	8039863	+
Merged-chr7-9096100-1	chr7	9096000	9096200	+
Merged-chr7-9142825-1	chr7	9142725	9142925	+
Merged-chr7-9784380-1	chr7	9784280	9784480	+
Merged-chr7-9841819-1	chr7	9841719	9841919	+
Merged-chr7-10006959-1	chr7	10006859	10007059	+
Merged-chr7-10308532-1	chr7	10308432	10308632	+
Merged-chr7-10502968-1	chr7	10502868	10503068	+
Merged-chr7-10506949-1	chr7	10506849	10507049	+
Merged-chr7-10523167-1	chr7	10523067	10523267	+
Merged-chr7-10571747-1	chr7	10571647	10571847	+
Merged-chr7-10726423-1	chr7	10726323	10726523	+
Merged-chr7-10727812-1	chr7	10727712	10727912	+
Merged-chr7-11752054-1	chr7	11751954	11752154	+
Merged-chr7-13040154-1	chr7	13040054	13040254	+
Merged-chr7-13883320-1	chr7	13883220	13883420	+
Merged-chr7-14343571-1	chr7	14343471	14343671	+
Merged-chr7-14344337-1	chr7	14344237	14344437	+
Merged-chr7-14705318-1	chr7	14705218	14705418	+
Merged-chr7-14985169-1	chr7	14985069	14985269	+
Merged-chr7-15559387-1	chr7	15559287	15559487	+
Merged-chr7-18866940-1	chr7	18866840	18867040	+
Merged-chr7-20327201-1	chr7	20327101	20327301	+
Merged-chr7-20328040-1	chr7	20327940	20328140	+
Merged-chr7-22015826-1	chr7	22015726	22015926	+
Merged-chr7-22679506-1	chr7	22679406	22679606	+
Merged-chr7-23943912-1	chr7	23943812	23944012	+
Merged-chr7-24256106-1	chr7	24256006	24256206	+
Merged-chr7-24896147-1	chr7	24896047	24896247	+
Merged-chr7-25302249-1	chr7	25302149	25302349	+
Merged-chr7-25447742-1	chr7	25447642	25447842	+
Merged-chr7-26066053-1	chr7	26065953	26066153	+
Merged-chr7-26666006-1	chr7	26665906	26666106	+
Merged-chr7-27491315-1	chr7	27491215	27491415	+
Merged-chr16-10103847-1	chr16	10103747	10103947	+
Merged-chr16-13976769-1	chr16	13976669	13976869	+
Merged-chr16-13977500-1	chr16	13977400	13977600	+
Merged-chr16-14682977-1	chr16	14682877	14683077	+
Merged-chr1-5557014-1	chr1	5556914	5557114	+
Merged-chr1-5800887-1	chr1	5800787	5800987	+
Merged-chr1-6426514-1	chr1	6426414	6426614	+
Merged-chr1-7289076-1	chr1	7288976	7289176	+
Merged-chr16-15201499-1	chr16	15201399	15201599	+
Merged-chr16-15279654-1	chr16	15279554	15279754	+
Merged-chr16-15963875-1	chr16	15963775	15963975	+
Merged-chr1-7600677-1	chr1	7600577	7600777	+
Merged-chr1-8147490-1	chr1	8147390	8147590	+
Merged-chr1-8181256-1	chr1	8181156	8181356	+
Merged-chr16-16292372-1	chr16	16292272	16292472	+
Merged-chr16-17395533-1	chr16	17395433	17395633	+
Merged-chr1-8926313-1	chr1	8926213	8926413	+
Merged-chr1-9869877-1	chr1	9869777	9869977	+
Merged-chr16-18018786-1	chr16	18018686	18018886	+
Merged-chr16-18036942-1	chr16	18036842	18037042	+
Merged-chr16-18401092-1	chr16	18400992	18401192	+
Merged-chr16-19073804-1	chr16	19073704	19073904	+
Merged-chr16-19154841-1	chr16	19154741	19154941	+
Merged-chr1-9951813-1	chr1	9951713	9951913	+
Merged-chr1-11020387-1	chr1	11020287	11020487	+
Merged-chr1-11333712-1	chr1	11333612	11333812	+
Merged-chr16-20037514-1	chr16	20037414	20037614	+
Merged-chr16-20302503-1	chr16	20302403	20302603	+
Merged-chr1-11940517-1	chr1	11940417	11940617	+
[truncated: 803 more rows]

## Sheet: G1 only
#name	chr	start	end	strand
Merged-chrX-153930501-1	chrX	153930401	153930601	+
Merged-chrX-154017211-1	chrX	154017111	154017311	+
Merged-chrX-154035720-1	chrX	154035620	154035820	+
Merged-chrX-154039575-1	chrX	154039475	154039675	+
Merged-chrX-154058646-1	chrX	154058546	154058746	+
Merged-chrX-155115350-1	chrX	155115250	155115450	+
Merged-chrX-155897082-1	chrX	155896982	155897182	+
Merged-chrX-155955823-1	chrX	155955723	155955923	+
Merged-chr2-36153577-1	chr2	36153477	36153677	+
Merged-chr2-36259033-1	chr2	36258933	36259133	+
Merged-chr2-36277593-1	chr2	36277493	36277693	+
Merged-chrX-155960578-1	chrX	155960478	155960678	+
Merged-chr2-36598836-1	chr2	36598736	36598936	+
Merged-chrX-155966752-1	chrX	155966652	155966852	+
Merged-chr2-36675529-1	chr2	36675429	36675629	+
Merged-chr2-36824725-1	chr2	36824625	36824825	+
Merged-chrX-156485480-1	chrX	156485380	156485580	+
Merged-chr2-36973414-1	chr2	36973314	36973514	+
Merged-chrX-156597021-1	chrX	156596921	156597121	+
Merged-chrX-156619042-1	chrX	156618942	156619142	+
Merged-chrX-156660062-1	chrX	156659962	156660162	+
Merged-chrX-156724352-1	chrX	156724252	156724452	+
Merged-chrX-156729240-1	chrX	156729140	156729340	+
Merged-chrX-156886542-1	chrX	156886442	156886642	+
Merged-chr2-37113222-1	chr2	37113122	37113322	+
Merged-chr2-37115909-1	chr2	37115809	37116009	+
Merged-chr2-37279487-1	chr2	37279387	37279587	+
Merged-chr2-37286411-1	chr2	37286311	37286511	+
Merged-chr2-37447380-1	chr2	37447280	37447480	+
Merged-chrX-157498313-1	chrX	157498213	157498413	+
Merged-chr2-38026219-1	chr2	38026119	38026319	+
Merged-chrX-157498984-1	chrX	157498884	157499084	+
Merged-chr2-38039542-1	chr2	38039442	38039642	+
Merged-chr2-38273683-1	chr2	38273583	38273783	+
Merged-chrX-157981487-1	chrX	157981387	157981587	+
Merged-chr2-38285706-1	chr2	38285606	38285806	+
Merged-chrX-158617694-1	chrX	158617594	158617794	+
Merged-chrX-158761847-1	chrX	158761747	158761947	+
Merged-chrX-158943331-1	chrX	158943231	158943431	+
Merged-chrX-159178379-1	chrX	159178279	159178479	+
Merged-chr2-38403530-1	chr2	38403430	38403630	+
Merged-chr2-38477468-1	chr2	38477368	38477568	+
Merged-chr2-38524502-1	chr2	38524402	38524602	+
Merged-chr2-38646193-1	chr2	38646093	38646293	+
Merged-chrX-159286835-1	chrX	159286735	159286935	+
Merged-chr2-38710868-1	chr2	38710768	38710968	+
Merged-chrX-159520887-1	chrX	159520787	159520987	+
Merged-chr2-38780821-1	chr2	38780721	38780921	+
Merged-chr2-38799731-1	chr2	38799631	38799831	+
Merged-chrX-159846240-1	chrX	159846140	159846340	+
Merged-chr2-38908839-1	chr2	38908739	38908939	+
Merged-chrX-160486572-1	chrX	160486472	160486672	+
Merged-chrX-161005155-1	chrX	161005055	161005255	+
Merged-chrX-161192754-1	chrX	161192654	161192854	+
Merged-chr2-39126594-1	chr2	39126494	39126694	+
Merged-chr2-39217080-1	chr2	39216980	39217180	+
Merged-chr2-39306590-1	chr2	39306490	39306690	+
Merged-chr2-39334621-1	chr2	39334521	39334721	+
Merged-chr2-39381961-1	chr2	39381861	39382061	+
Merged-chrX-162217123-1	chrX	162217023	162217223	+
Merged-chr2-39473635-1	chr2	39473535	39473735	+
Merged-chrX-162288364-1	chrX	162288264	162288464	+
Merged-chr2-39486354-1	chr2	39486254	39486454	+
Merged-chrX-162308017-1	chrX	162307917	162308117	+
Merged-chr2-39637971-1	chr2	39637871	39638071	+
Merged-chrX-163057246-1	chrX	163057146	163057346	+
Merged-chr2-39640091-1	chr2	39639991	39640191	+
Merged-chrX-163595759-1	chrX	163595659	163595859	+
Merged-chrX-163818223-1	chrX	163818123	163818323	+
Merged-chrX-165827914-1	chrX	165827814	165828014	+
Merged-chrX-166227712-1	chrX	166227612	166227812	+
Merged-chrX-166408681-1	chrX	166408581	166408781	+
Merged-chr2-39662526-1	chr2	39662426	39662626	+
Merged-chr2-39663849-1	chr2	39663749	39663949	+
Merged-chr2-39712240-1	chr2	39712140	39712340	+
Merged-chr2-39853005-1	chr2	39852905	39853105	+
Merged-chr2-39873747-1	chr2	39873647	39873847	+
Merged-chrX-166415042-1	chrX	166414942	166415142	+
Merged-chr2-39881353-1	chr2	39881253	39881453	+
Merged-chrX-166417114-1	chrX	166417014	166417214	+
Merged-chr2-40029733-1	chr2	40029633	40029833	+
Merged-chrX-166419673-1	chrX	166419573	166419773	+
Merged-chr2-40091732-1	chr2	40091632	40091832	+
Merged-chrX-166424782-1	chrX	166424682	166424882	+
Merged-chr2-40113827-1	chr2	40113727	40113927	+
Merged-chrX-166439751-1	chrX	166439651	166439851	+
Merged-chrX_random-195386-1	chrX_random	195286	195486	+
Merged-chrX_random-759169-1	chrX_random	759069	759269	+
Merged-chrX_random-773892-1	chrX_random	773792	773992	+
Merged-chrX_random-1510966-1	chrX_random	1510866	1511066	+
Merged-chr10-79861345-1	chr10	79861245	79861445	+
Merged-chr10-79949943-1	chr10	79949843	79950043	+
Merged-chr10-80024482-1	chr10	80024382	80024582	+
Merged-chr10-80381229-1	chr10	80381129	80381329	+
Merged-chr10-80391474-1	chr10	80391374	80391574	+
Merged-chr10-80409646-1	chr10	80409546	80409746	+
Merged-chr10-80439246-1	chr10	80439146	80439346	+
Merged-chr2-40166456-1	chr2	40166356	40166556	+
Merged-chr2-40613893-1	chr2	40613793	40613993	+
Merged-chr2-40646836-1	chr2	40646736	40646936	+
Merged-chr1-109857703-1	chr1	109857603	109857803	+
Merged-chr2-41042565-1	chr2	41042465	41042665	+
Merged-chrX_random-1728257-1	chrX_random	1728157	1728357	+
Merged-chr1-109874909-1	chr1	109874809	109875009	+
Merged-chr2-41201733-1	chr2	41201633	41201833	+
Merged-chrX_random-1772521-1	chrX_random	1772421	1772621	+
Merged-chr1-110287781-1	chr1	110287681	110287881	+
Merged-chr2-41377543-1	chr2	41377443	41377643	+
Merged-chrX_random-1783418-1	chrX_random	1783318	1783518	+
Merged-chr1-110312173-1	chr1	110312073	110312273	+
Merged-chr2-42606350-1	chr2	42606250	42606450	+
Merged-chrY-30263-1	chrY	30163	30363	+
Merged-chr1-110332164-1	chr1	110332064	110332264	+
Merged-chr2-42851828-1	chr2	42851728	42851928	+
Merged-chrY-323828-1	chrY	323728	323928	+
Merged-chrY-359390-1	chrY	359290	359490	+
Merged-chrY-918998-1	chrY	918898	919098	+
Merged-chr1-110704009-1	chr1	110703909	110704109	+
Merged-chrY-940114-1	chrY	940014	940214	+
Merged-chr1-110843476-1	chr1	110843376	110843576	+
Merged-chrY-1122543-1	chrY	1122443	1122643	+
Merged-chr1-110844984-1	chr1	110844884	110845084	+
Merged-chrY-1458562-1	chrY	1458462	1458662	+
Merged-chr10-80458172-1	chr10	80458072	80458272	+
Merged-chr10-80462764-1	chr10	80462664	80462864	+
Merged-chr10-80536427-1	chr10	80536327	80536527	+
Merged-chr10-80549833-1	chr10	80549733	80549933	+
Merged-chr10-80569370-1	chr10	80569270	80569470	+
Merged-chr10-80600536-1	chr10	80600436	80600636	+
Merged-chr10-80604695-1	chr10	80604595	80604795	+
Merged-chr2-43265532-1	chr2	43265432	43265632	+
Merged-chr2-43357134-1	chr2	43357034	43357234	+
Merged-chr2-43578403-1	chr2	43578303	43578503	+
Merged-chr2-43588120-1	chr2	43588020	43588220	+
Merged-chrY-1617358-1	chrY	1617258	1617458	+
Merged-chr1-110933358-1	chr1	110933258	110933458	+
Merged-chr2-44025178-1	chr2	44025078	44025278	+
Merged-chrY-1861542-1	chrY	1861442	1861642	+
Merged-chr1-111008844-1	chr1	111008744	111008944	+
Merged-chr2-44305196-1	chr2	44305096	44305296	+
Merged-chr2-44339104-1	chr2	44339004	44339204	+
Merged-chrY-2087486-1	chrY	2087386	2087586	+
Merged-chr1-111032769-1	chr1	111032669	111032869	+
Merged-chrY-2108714-1	chrY	2108614	2108814	+
Merged-chrY-2118987-1	chrY	2118887	2119087	+
Merged-chr1-111510512-1	chr1	111510412	111510612	+
Merged-chr1-111515490-1	chr1	111515390	111515590	+
Merged-chrY-2157744-1	chrY	2157644	2157844	+
Merged-chr1-111937155-1	chr1	111937055	111937255	+
Merged-chrY-2188024-1	chrY	2187924	2188124	+
Merged-chrY-2189268-1	chrY	2189168	2189368	+
Merged-chr10-80825312-1	chr10	80825212	80825412	+
Merged-chr10-81065895-1	chr10	81065795	81065995	+
Merged-chr10-81077170-1	chr10	81077070	81077270	+
Merged-chr10-81118114-1	chr10	81118014	81118214	+
Merged-chr10-81134676-1	chr10	81134576	81134776	+
Merged-chr10-81233368-1	chr10	81233268	81233468	+
Merged-chr10-81312467-1	chr10	81312367	81312567	+
Merged-chr2-44486609-1	chr2	44486509	44486709	+
Merged-chr2-44636648-1	chr2	44636548	44636748	+
Merged-chr2-44944173-1	chr2	44944073	44944273	+
Merged-chr1-112228692-1	chr1	112228592	112228792	+
Merged-chr2-46243879-1	chr2	46243779	46243979	+
Merged-chrY-2354284-1	chrY	2354184	2354384	+
Merged-chr1-112555944-1	chr1	112555844	112556044	+
Merged-chr2-46400316-1	chr2	46400216	46400416	+
Merged-chrY-2388216-1	chrY	2388116	2388316	+
Merged-chr1-112671581-1	chr1	112671481	112671681	+
Merged-chrY-2403703-1	chrY	2403603	2403803	+
Merged-chr1-112687330-1	chr1	112687230	112687430	+
Merged-chr2-46580770-1	chr2	46580670	46580870	+
Merged-chrY_random-143599-1	chrY_random	143499	143699	+
Merged-chr1-113131110-1	chr1	113131010	113131210	+
Merged-chr2-46586267-1	chr2	46586167	46586367	+
Merged-chr1-113156770-1	chr1	113156670	113156870	+
Merged-chrY_random-924399-1	chrY_random	924299	924499	+
Merged-chr1-113507615-1	chr1	113507515	113507715	+
Merged-chrY_random-1943895-1	chrY_random	1943795	1943995	+
Merged-chr1-113543475-1	chr1	113543375	113543575	+
Merged-chrY_random-2139314-1	chrY_random	2139214	2139414	+
Merged-chr1-113591582-1	chr1	113591482	113591682	+
Merged-chr10-81392778-1	chr10	81392678	81392878	+
Merged-chr10-81444715-1	chr10	81444615	81444815	+
Merged-chr10-81623426-1	chr10	81623326	81623526	+
Merged-chr10-81720276-1	chr10	81720176	81720376	+
Merged-chr10-81845999-1	chr10	81845899	81846099	+
Merged-chr10-82033454-1	chr10	82033354	82033554	+
Merged-chr10-82037322-1	chr10	82037222	82037422	+
Merged-chr10-82114134-1	chr10	82114034	82114234	+
Merged-chr2-47017441-1	chr2	47017341	47017541	+
Merged-chr2-47402228-1	chr2	47402128	47402328	+
Merged-chr2-47406882-1	chr2	47406782	47406982	+
Merged-chr1-113592830-1	chr1	113592730	113592930	+
Merged-chr2-47832788-1	chr2	47832688	47832888	+
Merged-chr1-114112668-1	chr1	114112568	114112768	+
Merged-chr2-48345638-1	chr2	48345538	48345738	+
Merged-chr2-49435129-1	chr2	49435029	49435229	+
Merged-chr2-49582731-1	chr2	49582631	49582831	+
Merged-chr1-114349463-1	chr1	114349363	114349563	+
Merged-chr1-114477313-1	chr1	114477213	114477413	+
Merged-chr1-114675274-1	chr1	114675174	114675374	+
Merged-chr1-114676460-1	chr1	114676360	114676560	+
Merged-chr1-114826586-1	chr1	114826486	114826686	+
Merged-chr10-82233873-1	chr10	82233773	82233973	+
Merged-chr10-82261441-1	chr10	82261341	82261541	+
Merged-chr10-82321929-1	chr10	82321829	82322029	+
Merged-chr10-82356474-1	chr10	82356374	82356574	+
Merged-chr10-82360384-1	chr10	82360284	82360484	+
Merged-chr10-82402640-1	chr10	82402540	82402740	+
Merged-chr2-49684002-1	chr2	49683902	49684102	+
Merged-chr2-49904158-1	chr2	49904058	49904258	+
Merged-chr2-50164932-1	chr2	50164832	50165032	+
Merged-chr2-50181256-1	chr2	50181156	50181356	+
Merged-chr1-114828667-1	chr1	114828567	114828767	+
Merged-chr2-50228651-1	chr2	50228551	50228751	+
Merged-chr1-114851463-1	chr1	114851363	114851563	+
Merged-chr2-50409319-1	chr2	50409219	50409419	+
Merged-chr1-114913078-1	chr1	114912978	114913178	+
Merged-chr2-50535493-1	chr2	50535393	50535593	+
Merged-chr1-114913865-1	chr1	114913765	114913965	+
Merged-chr2-50835964-1	chr2	50835864	50836064	+
Merged-chr1-115000345-1	chr1	115000245	115000445	+
Merged-chr1-115255140-1	chr1	115255040	115255240	+
Merged-chr1-115399876-1	chr1	115399776	115399976	+
Merged-chr1-115646392-1	chr1	115646292	115646492	+
Merged-chr1-115855843-1	chr1	115855743	115855943	+
Merged-chr10-82807099-1	chr10	82806999	82807199	+
Merged-chr10-82808733-1	chr10	82808633	82808833	+
Merged-chr10-82838914-1	chr10	82838814	82839014	+
Merged-chr10-82881364-1	chr10	82881264	82881464	+
Merged-chr10-82923186-1	chr10	82923086	82923286	+
Merged-chr10-82924263-1	chr10	82924163	82924363	+
Merged-chr10-82932540-1	chr10	82932440	82932640	+
Merged-chr10-83140273-1	chr10	83140173	83140373	+
Merged-chr1-116652678-1	chr1	116652578	116652778	+
Merged-chr1-116746434-1	chr1	116746334	116746534	+
Merged-chr1-117228634-1	chr1	117228534	117228734	+
Merged-chr1-117346723-1	chr1	117346623	117346823	+
Merged-chr1-117455280-1	chr1	117455180	117455380	+
Merged-chr1-117581364-1	chr1	117581264	117581464	+
Merged-chr1-117681505-1	chr1	117681405	117681605	+
Merged-chr1-117699963-1	chr1	117699863	117700063	+
Merged-chr1-117966982-1	chr1	117966882	117967082	+
Merged-chr10-83160406-1	chr10	83160306	83160506	+
Merged-chr10-83173053-1	chr10	83172953	83173153	+
Merged-chr10-83187309-1	chr10	83187209	83187409	+
Merged-chr10-83250803-1	chr10	83250703	83250903	+
Merged-chr10-83282584-1	chr10	83282484	83282684	+
Merged-chr10-83417243-1	chr10	83417143	83417343	+
Merged-chr10-83880850-1	chr10	83880750	83880950	+
Merged-chr10-83945947-1	chr10	83945847	83946047	+
Merged-chr10-84020293-1	chr10	84020193	84020393	+
Merged-chr1-118263521-1	chr1	118263421	118263621	+
Merged-chr1-118551346-1	chr1	118551246	118551446	+
Merged-chr1-118757298-1	chr1	118757198	118757398	+
Merged-chr1-118951596-1	chr1	118951496	118951696	+
Merged-chr1-119206384-1	chr1	119206284	119206484	+
Merged-chr1-119354881-1	chr1	119354781	119354981	+
Merged-chr1-119378719-1	chr1	119378619	119378819	+
Merged-chr1-119485526-1	chr1	119485426	119485626	+
Merged-chr1-119530778-1	chr1	119530678	119530878	+
Merged-chr10-84053424-1	chr10	84053324	84053524	+
Merged-chr10-84102982-1	chr10	84102882	84103082	+
Merged-chr10-84170862-1	chr10	84170762	84170962	+
Merged-chr10-84184877-1	chr10	84184777	84184977	+
Merged-chr10-84217700-1	chr10	84217600	84217800	+
Merged-chr10-84218803-1	chr10	84218703	84218903	+
Merged-chr10-84221380-1	chr10	84221280	84221480	+
Merged-chr1-119547031-1	chr1	119546931	119547131	+
Merged-chr1-119645702-1	chr1	119645602	119645802	+
Merged-chr1-119713010-1	chr1	119712910	119713110	+
Merged-chr1-119854378-1	chr1	119854278	119854478	+
Merged-chr1-119900634-1	chr1	119900534	119900734	+
Merged-chr1-119909508-1	chr1	119909408	119909608	+
Merged-chr1-120047855-1	chr1	120047755	120047955	+
Merged-chr1-120285465-1	chr1	120285365	120285565	+
Merged-chr1-120299315-1	chr1	120299215	120299415	+
Merged-chr10-84373832-1	chr10	84373732	84373932	+
Merged-chr10-84384281-1	chr10	84384181	84384381	+
Merged-chr10-84648297-1	chr10	84648197	84648397	+
Merged-chr10-84672077-1	chr10	84671977	84672177	+
Merged-chr10-84720423-1	chr10	84720323	84720523	+
Merged-chr10-84936124-1	chr10	84936024	84936224	+
Merged-chr1-120355903-1	chr1	120355803	120356003	+
Merged-chr1-120522273-1	chr1	120522173	120522373	+
Merged-chr1-120523064-1	chr1	120522964	120523164	+
Merged-chr1-120530403-1	chr1	120530303	120530503	+
Merged-chr1-120539275-1	chr1	120539175	120539375	+
Merged-chr1-120559886-1	chr1	120559786	120559986	+
Merged-chr1-120587337-1	chr1	120587237	120587437	+
Merged-chr10-85006132-1	chr10	85006032	85006232	+
Merged-chr10-85178512-1	chr10	85178412	85178612	+
Merged-chr10-85235509-1	chr10	85235409	85235609	+
Merged-chr10-85334440-1	chr10	85334340	85334540	+
Merged-chr10-85801002-1	chr10	85800902	85801102	+
Merged-chr10-86434958-1	chr10	86434858	86435058	+
Merged-chr10-86906875-1	chr10	86906775	86906975	+
Merged-chr1-120900588-1	chr1	120900488	120900688	+
Merged-chr1-120930983-1	chr1	120930883	120931083	+
Merged-chr1-121044360-1	chr1	121044260	121044460	+
Merged-chr1-121063103-1	chr1	121063003	121063203	+
Merged-chr1-121064145-1	chr1	121064045	121064245	+
Merged-chr1-121196696-1	chr1	121196596	121196796	+
Merged-chr1-121201866-1	chr1	121201766	121201966	+
Merged-chr7-83489138-1	chr7	83489038	83489238	+
Merged-chr7-83760838-1	chr7	83760738	83760938	+
Merged-chr7-84534688-1	chr7	84534588	84534788	+
Merged-chr7-84619340-1	chr7	84619240	84619440	+
Merged-chr7-85232845-1	chr7	85232745	85232945	+
Merged-chr7-85302390-1	chr7	85302290	85302490	+
Merged-chr7-85543416-1	chr7	85543316	85543516	+
Merged-chr7-85713967-1	chr7	85713867	85714067	+
Merged-chr7-85730662-1	chr7	85730562	85730762	+
Merged-chr7-85991049-1	chr7	85990949	85991149	+
Merged-chr7-86000058-1	chr7	85999958	86000158	+
Merged-chr7-86332818-1	chr7	86332718	86332918	+
Merged-chr7-86440590-1	chr7	86440490	86440690	+
Merged-chr7-86443672-1	chr7	86443572	86443772	+
Merged-chr7-86543514-1	chr7	86543414	86543614	+
Merged-chr7-86611245-1	chr7	86611145	86611345	+
Merged-chr7-86618818-1	chr7	86618718	86618918	+
Merged-chr7-86723631-1	chr7	86723531	86723731	+
Merged-chr7-86874301-1	chr7	86874201	86874401	+
Merged-chr7-87120356-1	chr7	87120256	87120456	+
Merged-chr16-22429203-1	chr16	22429103	22429303	+
Merged-chr16-22545383-1	chr16	22545283	22545483	+
Merged-chr16-22548576-1	chr16	22548476	22548676	+
Merged-chr16-22924884-1	chr16	22924784	22924984	+
Merged-chr16-22991781-1	chr16	22991681	22991881	+
Merged-chr7-87160366-1	chr7	87160266	87160466	+
Merged-chr7-87297582-1	chr7	87297482	87297682	+
Merged-chr7-87310213-1	chr7	87310113	87310313	+
Merged-chr7-87331099-1	chr7	87330999	87331199	+
Merged-chr7-87531316-1	chr7	87531216	87531416	+
Merged-chr16-23021011-1	chr16	23020911	23021111	+
Merged-chr16-23030976-1	chr16	23030876	23031076	+
Merged-chr16-23107549-1	chr16	23107449	23107649	+
Merged-chr16-23114750-1	chr16	23114650	23114850	+
Merged-chr16-23128136-1	chr16	23128036	23128236	+
Merged-chr16-23262506-1	chr16	23262406	23262606	+
Merged-chr16-23482469-1	chr16	23482369	23482569	+
Merged-chr7-87778756-1	chr7	87778656	87778856	+
Merged-chr7-87924301-1	chr7	87924201	87924401	+
Merged-chr7-87998863-1	chr7	87998763	87998963	+
Merged-chr7-88087719-1	chr7	88087619	88087819	+
Merged-chr7-88480726-1	chr7	88480626	88480826	+
Merged-chr16-23922654-1	chr16	23922554	23922754	+
Merged-chr16-24300362-1	chr16	24300262	24300462	+
Merged-chr16-24392731-1	chr16	24392631	24392831	+
Merged-chr16-24406771-1	chr16	24406671	24406871	+
Merged-chr16-25030503-1	chr16	25030403	25030603	+
Merged-chr7-88488333-1	chr7	88488233	88488433	+
Merged-chr7-88642159-1	chr7	88642059	88642259	+
Merged-chr7-88666812-1	chr7	88666712	88666912	+
Merged-chr7-88760128-1	chr7	88760028	88760228	+
Merged-chr7-89301489-1	chr7	89301389	89301589	+
Merged-chr7-89360626-1	chr7	89360526	89360726	+
Merged-chr7-89369063-1	chr7	89368963	89369163	+
Merged-chr16-25038878-1	chr16	25038778	25038978	+
Merged-chr16-25517849-1	chr16	25517749	25517949	+
Merged-chr16-25522427-1	chr16	25522327	25522527	+
Merged-chr16-25644758-1	chr16	25644658	25644858	+
Merged-chr16-25871756-1	chr16	25871656	25871856	+
Merged-chr16-27077293-1	chr16	27077193	27077393	+
Merged-chr16-27133892-1	chr16	27133792	27133992	+
Merged-chr7-89381787-1	chr7	89381687	89381887	+
Merged-chr7-89392879-1	chr7	89392779	89392979	+
Merged-chr7-89618151-1	chr7	89618051	89618251	+
Merged-chr7-89883648-1	chr7	89883548	89883748	+
Merged-chr7-89890003-1	chr7	89889903	89890103	+
Merged-chr7-89920052-1	chr7	89919952	89920152	+
Merged-chr16-27184355-1	chr16	27184255	27184455	+
Merged-chr16-27920323-1	chr16	27920223	27920423	+
Merged-chr16-28039179-1	chr16	28039079	28039279	+
Merged-chr16-28191689-1	chr16	28191589	28191789	+
Merged-chr16-28192902-1	chr16	28192802	28193002	+
Merged-chr16-28929048-1	chr16	28928948	28929148	+
Merged-chr16-28936604-1	chr16	28936504	28936704	+
Merged-chr16-29645155-1	chr16	29645055	29645255	+
Merged-chr7-90157044-1	chr7	90156944	90157144	+
Merged-chr7-90386128-1	chr7	90386028	90386228	+
Merged-chr7-90525485-1	chr7	90525385	90525585	+
Merged-chr7-90549703-1	chr7	90549603	90549803	+
Merged-chr7-90587357-1	chr7	90587257	90587457	+
Merged-chr7-90720580-1	chr7	90720480	90720680	+
Merged-chr7-91033601-1	chr7	91033501	91033701	+
Merged-chr16-29823101-1	chr16	29823001	29823201	+
Merged-chr16-30206348-1	chr16	30206248	30206448	+
Merged-chr16-30331415-1	chr16	30331315	30331515	+
Merged-chr16-30390911-1	chr16	30390811	30391011	+
Merged-chr16-30512471-1	chr16	30512371	30512571	+
Merged-chr16-30515706-1	chr16	30515606	30515806	+
Merged-chr16-30555045-1	chr16	30554945	30555145	+
Merged-chr16-30557180-1	chr16	30557080	30557280	+
Merged-chr16-30587934-1	chr16	30587834	30588034	+
Merged-chr7-91076631-1	chr7	91076531	91076731	+
Merged-chr7-91143103-1	chr7	91143003	91143203	+
Merged-chr7-91150288-1	chr7	91150188	91150388	+
Merged-chr7-91226731-1	chr7	91226631	91226831	+
Merged-chr7-91339450-1	chr7	91339350	91339550	+
Merged-chr7-91550546-1	chr7	91550446	91550646	+
Merged-chr7-91641725-1	chr7	91641625	91641825	+
Merged-chr7-91799781-1	chr7	91799681	91799881	+
Merged-chr7-91898566-1	chr7	91898466	91898666	+
Merged-chr16-30599450-1	chr16	30599350	30599550	+
Merged-chr16-30694425-1	chr16	30694325	30694525	+
Merged-chr16-30740738-1	chr16	30740638	30740838	+
Merged-chr16-30829782-1	chr16	30829682	30829882	+
Merged-chr16-30906632-1	chr16	30906532	30906732	+
Merged-chr7-92249534-1	chr7	92249434	92249634	+
Merged-chr7-92324863-1	chr7	92324763	92324963	+
Merged-chr7-92510181-1	chr7	92510081	92510281	+
Merged-chr7-92514400-1	chr7	92514300	92514500	+
Merged-chr7-92526593-1	chr7	92526493	92526693	+
Merged-chr7-92590370-1	chr7	92590270	92590470	+
Merged-chr7-92867664-1	chr7	92867564	92867764	+
Merged-chr7-92910292-1	chr7	92910192	92910392	+
Merged-chr7-93075709-1	chr7	93075609	93075809	+
Merged-chr16-30919807-1	chr16	30919707	30919907	+
Merged-chr16-30940120-1	chr16	30940020	30940220	+
Merged-chr16-31007175-1	chr16	31007075	31007275	+
Merged-chr16-31091482-1	chr16	31091382	31091582	+
Merged-chr16-31097989-1	chr16	31097889	31098089	+
Merged-chr16-31235386-1	chr16	31235286	31235486	+
Merged-chr16-31291032-1	chr16	31290932	31291132	+
Merged-chr16-31300164-1	chr16	31300064	31300264	+
Merged-chr16-31343042-1	chr16	31342942	31343142	+
Merged-chr16-31384946-1	chr16	31384846	31385046	+
Merged-chr16-31388383-1	chr16	31388283	31388483	+
Merged-chr16-31509245-1	chr16	31509145	31509345	+
Merged-chr16-31578676-1	chr16	31578576	31578776	+
Merged-chr16-31893823-1	chr16	31893723	31893923	+
Merged-chr16-31902091-1	chr16	31901991	31902191	+
Merged-chr16-31926987-1	chr16	31926887	31927087	+
Merged-chr16-31981324-1	chr16	31981224	31981424	+
Merged-chr16-32068940-1	chr16	32068840	32069040	+
Merged-chr16-32101230-1	chr16	32101130	32101330	+
Merged-chr16-32153301-1	chr16	32153201	32153401	+
Merged-chr16-32278160-1	chr16	32278060	32278260	+
Merged-chr4-138249099-1	chr4	138248999	138249199	+
Merged-chr4-138256331-1	chr4	138256231	138256431	+
Merged-chr4-138412653-1	chr4	138412553	138412753	+
Merged-chr4-138604829-1	chr4	138604729	138604929	+
Merged-chr4-138687023-1	chr4	138686923	138687123	+
Merged-chr4-138701209-1	chr4	138701109	138701309	+
Merged-chr4-138788674-1	chr4	138788574	138788774	+
Merged-chr4-138868741-1	chr4	138868641	138868841	+
Merged-chr4-138936400-1	chr4	138936300	138936500	+
Merged-chr4-139167775-1	chr4	139167675	139167875	+
Merged-chr4-139171119-1	chr4	139171019	139171219	+
Merged-chr4-139178814-1	chr4	139178714	139178914	+
Merged-chr4-139509030-1	chr4	139508930	139509130	+
Merged-chr4-139962567-1	chr4	139962467	139962667	+
Merged-chr4-139963109-1	chr4	139963009	139963209	+
Merged-chr4-140195495-1	chr4	140195395	140195595	+
Merged-chr4-140196289-1	chr4	140196189	140196389	+
Merged-chr4-140200900-1	chr4	140200800	140201000	+
Merged-chr4-140244553-1	chr4	140244453	140244653	+
Merged-chr4-140613249-1	chr4	140613149	140613349	+
Merged-chr4-140617517-1	chr4	140617417	140617617	+
Merged-chr4-140634339-1	chr4	140634239	140634439	+
Merged-chr4-140635381-1	chr4	140635281	140635481	+
Merged-chr4-140765885-1	chr4	140765785	140765985	+
Merged-chr4-140813767-1	chr4	140813667	140813867	+
Merged-chr4-140838797-1	chr4	140838697	140838897	+
Merged-chr4-140860510-1	chr4	140860410	140860610	+
Merged-chr4-140885013-1	chr4	140884913	140885113	+
Merged-chr4-140916938-1	chr4	140916838	140917038	+
Merged-chr4-140919226-1	chr4	140919126	140919326	+
Merged-chr4-140975594-1	chr4	140975494	140975694	+
Merged-chr4-140997108-1	chr4	140997008	140997208	+
Merged-chr4-141108598-1	chr4	141108498	141108698	+
Merged-chr4-141114931-1	chr4	141114831	141115031	+
Merged-chr4-141120487-1	chr4	141120387	141120587	+
Merged-chr14-8973018-1	chr14	8972918	8973118	+
Merged-chr14-9051504-1	chr14	9051404	9051604	+
Merged-chr14-9117819-1	chr14	9117719	9117919	+
Merged-chr14-9518902-1	chr14	9518802	9519002	+
Merged-chr14-9542136-1	chr14	9542036	9542236	+
Merged-chr14-9576907-1	chr14	9576807	9577007	+
Merged-chr4-141126128-1	chr4	141126028	141126228	+
Merged-chr4-141154550-1	chr4	141154450	141154650	+
Merged-chr4-141181505-1	chr4	141181405	141181605	+
Merged-chr4-141217744-1	chr4	141217644	141217844	+
Merged-chr4-141350089-1	chr4	141349989	141350189	+
Merged-chr4-141365910-1	chr4	141365810	141366010	+
Merged-chr12-79451996-1	chr12	79451896	79452096	+
Merged-chr4-141407392-1	chr4	141407292	141407492	+
Merged-chr12-79507364-1	chr12	79507264	79507464	+
Merged-chr4-141408681-1	chr4	141408581	141408781	+
Merged-chr12-79508858-1	chr12	79508758	79508958	+
Merged-chr12-79807163-1	chr12	79807063	79807263	+
Merged-chr12-80128795-1	chr12	80128695	80128895	+
Merged-chr12-80136577-1	chr12	80136477	80136677	+
Merged-chr14-9582927-1	chr14	9582827	9583027	+
Merged-chr14-9878036-1	chr14	9877936	9878136	+
Merged-chr14-9963619-1	chr14	9963519	9963719	+
Merged-chr14-10002364-1	chr14	10002264	10002464	+
Merged-chr14-10003822-1	chr14	10003722	10003922	+
Merged-chr14-10159992-1	chr14	10159892	10160092	+
Merged-chr14-10209231-1	chr14	10209131	10209331	+
Merged-chr14-10226134-1	chr14	10226034	10226234	+
Merged-chr14-10504492-1	chr14	10504392	10504592	+
Merged-chr14-10691717-1	chr14	10691617	10691817	+
Merged-chr4-141421117-1	chr4	141421017	141421217	+
Merged-chr4-141555551-1	chr4	141555451	141555651	+
Merged-chr4-141622618-1	chr4	141622518	141622718	+
Merged-chr4-141625373-1	chr4	141625273	141625473	+
Merged-chr12-80349297-1	chr12	80349197	80349397	+
Merged-chr12-80527984-1	chr12	80527884	80528084	+
Merged-chr4-141722655-1	chr4	141722555	141722755	+
Merged-chr4-141727758-1	chr4	141727658	141727858	+
Merged-chr12-80727051-1	chr12	80726951	80727151	+
Merged-chr12-80953083-1	chr12	80952983	80953183	+
Merged-chr12-81014863-1	chr12	81014763	81014963	+
Merged-chr12-81135401-1	chr12	81135301	81135501	+
Merged-chr12-81171808-1	chr12	81171708	81171908	+
Merged-chr14-10875091-1	chr14	10874991	10875191	+
Merged-chr14-11001786-1	chr14	11001686	11001886	+
Merged-chr14-11017944-1	chr14	11017844	11018044	+
Merged-chr14-12156872-1	chr14	12156772	12156972	+
Merged-chr14-12393440-1	chr14	12393340	12393540	+
Merged-chr14-12505833-1	chr14	12505733	12505933	+
Merged-chr4-141810160-1	chr4	141810060	141810260	+
Merged-chr4-142099516-1	chr4	142099416	142099616	+
Merged-chr4-142818041-1	chr4	142817941	142818141	+
Merged-chr4-142828637-1	chr4	142828537	142828737	+
Merged-chr4-142837869-1	chr4	142837769	142837969	+
Merged-chr12-81214161-1	chr12	81214061	81214261	+
Merged-chr4-142852662-1	chr4	142852562	142852762	+
Merged-chr4-142893458-1	chr4	142893358	142893558	+
Merged-chr12-81226483-1	chr12	81226383	81226583	+
Merged-chr12-81228302-1	chr12	81228202	81228402	+
Merged-chr4-142914221-1	chr4	142914121	142914321	+
Merged-chr12-81229427-1	chr12	81229327	81229527	+
Merged-chr12-81247493-1	chr12	81247393	81247593	+
Merged-chr12-81253092-1	chr12	81252992	81253192	+
Merged-chr12-81318300-1	chr12	81318200	81318400	+
Merged-chr12-81324074-1	chr12	81323974	81324174	+
Merged-chr12-81324646-1	chr12	81324546	81324746	+
Merged-chr14-13081518-1	chr14	13081418	13081618	+
Merged-chr14-13131952-1	chr14	13131852	13132052	+
Merged-chr14-13670519-1	chr14	13670419	13670619	+
Merged-chr14-13982327-1	chr14	13982227	13982427	+
Merged-chr14-14054542-1	chr14	14054442	14054642	+
Merged-chr14-14111747-1	chr14	14111647	14111847	+
Merged-chr14-14181977-1	chr14	14181877	14182077	+
Merged-chr4-143176740-1	chr4	143176640	143176840	+
Merged-chr4-143241629-1	chr4	143241529	143241729	+
Merged-chr4-143573479-1	chr4	143573379	143573579	+
Merged-chr4-143606760-1	chr4	143606660	143606860	+
Merged-chr4-143746495-1	chr4	143746395	143746595	+
Merged-chr12-81329046-1	chr12	81328946	81329146	+
Merged-chr4-143925991-1	chr4	143925891	143926091	+
Merged-chr12-81374660-1	chr12	81374560	81374760	+
Merged-chr4-144018855-1	chr4	144018755	144018955	+
Merged-chr12-81588526-1	chr12	81588426	81588626	+
Merged-chr4-144140927-1	chr4	144140827	144141027	+
Merged-chr12-81728407-1	chr12	81728307	81728507	+
Merged-chr4-144223521-1	chr4	144223421	144223621	+
Merged-chr12-81745023-1	chr12	81744923	81745123	+
Merged-chr12-81774357-1	chr12	81774257	81774457	+
Merged-chr12-81891201-1	chr12	81891101	81891301	+
Merged-chr12-81990593-1	chr12	81990493	81990693	+
Merged-chr12-82022526-1	chr12	82022426	82022626	+
Merged-chr14-14350396-1	chr14	14350296	14350496	+
Merged-chr14-14430617-1	chr14	14430517	14430717	+
Merged-chr14-14563451-1	chr14	14563351	14563551	+
Merged-chr14-14665664-1	chr14	14665564	14665764	+
Merged-chr14-14740441-1	chr14	14740341	14740541	+
Merged-chr14-14750377-1	chr14	14750277	14750477	+
Merged-chr14-14880515-1	chr14	14880415	14880615	+
Merged-chr14-14953502-1	chr14	14953402	14953602	+
Merged-chr14-15123218-1	chr14	15123118	15123318	+
Merged-chr4-144431000-1	chr4	144430900	144431100	+
Merged-chr4-144431731-1	chr4	144431631	144431831	+
Merged-chr4-144441658-1	chr4	144441558	144441758	+
Merged-chr4-144463048-1	chr4	144462948	144463148	+
Merged-chr4-144695023-1	chr4	144694923	144695123	+
Merged-chr12-82048226-1	chr12	82048126	82048326	+
Merged-chr4-144784935-1	chr4	144784835	144785035	+
Merged-chr12-82052012-1	chr12	82051912	82052112	+
Merged-chr4-144797932-1	chr4	144797832	144798032	+
Merged-chr12-82457222-1	chr12	82457122	82457322	+
Merged-chr12-82539903-1	chr12	82539803	82540003	+
Merged-chr12-82586146-1	chr12	82586046	82586246	+
Merged-chr12-82889954-1	chr12	82889854	82890054	+
Merged-chr14-15185884-1	chr14	15185784	15185984	+
Merged-chr14-15309478-1	chr14	15309378	15309578	+
Merged-chr14-15541813-1	chr14	15541713	15541913	+
Merged-chr14-15867356-1	chr14	15867256	15867456	+
Merged-chr14-15957922-1	chr14	15957822	15958022	+
Merged-chr14-15973486-1	chr14	15973386	15973586	+
Merged-chr12-83098701-1	chr12	83098601	83098801	+
Merged-chr12-83294591-1	chr12	83294491	83294691	+
Merged-chr12-83326794-1	chr12	83326694	83326894	+
Merged-chr12-83377749-1	chr12	83377649	83377849	+
Merged-chr12-83566828-1	chr12	83566728	83566928	+
Merged-chr12-83594418-1	chr12	83594318	83594518	+
Merged-chr12-83841418-1	chr12	83841318	83841518	+
Merged-chr12-84312362-1	chr12	84312262	84312462	+
Merged-chr12-84789189-1	chr12	84789089	84789289	+
Merged-chr14-16371591-1	chr14	16371491	16371691	+
Merged-chr14-16475609-1	chr14	16475509	16475709	+
Merged-chr14-16502010-1	chr14	16501910	16502110	+
Merged-chr14-16567291-1	chr14	16567191	16567391	+
Merged-chr14-16810010-1	chr14	16809910	16810110	+
Merged-chr14-16870786-1	chr14	16870686	16870886	+
Merged-chr14-16905223-1	chr14	16905123	16905323	+
Merged-chr14-16979378-1	chr14	16979278	16979478	+
Merged-chr12-84826151-1	chr12	84826051	84826251	+
Merged-chr12-84829643-1	chr12	84829543	84829743	+
Merged-chr12-84857581-1	chr12	84857481	84857681	+
Merged-chr12-84911035-1	chr12	84910935	84911135	+
Merged-chr12-85275681-1	chr12	85275581	85275781	+
Merged-chr12-85362917-1	chr12	85362817	85363017	+
Merged-chr14-17051749-1	chr14	17051649	17051849	+
Merged-chr14-17622949-1	chr14	17622849	17623049	+
Merged-chr14-17712037-1	chr14	17711937	17712137	+
Merged-chr14-17741159-1	chr14	17741059	17741259	+
Merged-chr14-17741729-1	chr14	17741629	17741829	+
Merged-chr14-18127839-1	chr14	18127739	18127939	+
Merged-chr14-18427054-1	chr14	18426954	18427154	+
Merged-chr14-18528313-1	chr14	18528213	18528413	+
Merged-chr12-85370101-1	chr12	85370001	85370201	+
Merged-chr12-85381124-1	chr12	85381024	85381224	+
Merged-chr12-85543294-1	chr12	85543194	85543394	+
Merged-chr12-85857855-1	chr12	85857755	85857955	+
Merged-chr12-85887244-1	chr12	85887144	85887344	+
Merged-chr14-18619683-1	chr14	18619583	18619783	+
Merged-chr14-18975989-1	chr14	18975889	18976089	+
Merged-chr14-19012027-1	chr14	19011927	19012127	+
Merged-chr14-19017056-1	chr14	19016956	19017156	+
Merged-chr14-19089073-1	chr14	19088973	19089173	+
Merged-chr14-19372932-1	chr14	19372832	19373032	+
Merged-chr14-19379316-1	chr14	19379216	19379416	+
Merged-chr12-86125701-1	chr12	86125601	86125801	+
Merged-chr12-86214591-1	chr12	86214491	86214691	+
Merged-chr12-86337235-1	chr12	86337135	86337335	+
Merged-chr12-86373946-1	chr12	86373846	86374046	+
Merged-chr12-86472494-1	chr12	86472394	86472594	+
Merged-chr12-86612381-1	chr12	86612281	86612481	+
Merged-chr12-86695212-1	chr12	86695112	86695312	+
Merged-chr12-86747846-1	chr12	86747746	86747946	+
Merged-chr12-86748669-1	chr12	86748569	86748769	+
Merged-chr14-19695798-1	chr14	19695698	19695898	+
Merged-chr14-19698649-1	chr14	19698549	19698749	+
Merged-chr14-19712248-1	chr14	19712148	19712348	+
Merged-chr14-19845001-1	chr14	19844901	19845101	+
Merged-chr14-20070032-1	chr14	20069932	20070132	+
Merged-chr14-20518604-1	chr14	20518504	20518704	+
Merged-chr14-20550610-1	chr14	20550510	20550710	+
Merged-chr12-86956586-1	chr12	86956486	86956686	+
Merged-chr12-87845567-1	chr12	87845467	87845667	+
Merged-chr12-87857400-1	chr12	87857300	87857500	+
Merged-chrY_random-3403257-1	chrY_random	3403157	3403357	+
Merged-chrY_random-3406941-1	chrY_random	3406841	3407041	+
Merged-chrY_random-4606779-1	chrY_random	4606679	4606879	+
Merged-chrY_random-6223753-1	chrY_random	6223653	6223853	+
Merged-chrY_random-6414423-1	chrY_random	6414323	6414523	+
Merged-chrY_random-7651587-1	chrY_random	7651487	7651687	+
Merged-chrY_random-7889450-1	chrY_random	7889350	7889550	+
Merged-chrY_random-8621113-1	chrY_random	8621013	8621213	+
Merged-chrY_random-8720980-1	chrY_random	8720880	8721080	+
Merged-chrY_random-8721445-1	chrY_random	8721345	8721545	+
Merged-chrY_random-9748026-1	chrY_random	9747926	9748126	+
Merged-chrY_random-10081962-1	chrY_random	10081862	10082062	+
Merged-chrY_random-10694442-1	chrY_random	10694342	10694542	+
Merged-chrY_random-10733151-1	chrY_random	10733051	10733251	+
Merged-chrY_random-10738069-1	chrY_random	10737969	10738169	+
Merged-chrY_random-12193944-1	chrY_random	12193844	12194044	+
Merged-chr2-50940809-1	chr2	50940709	50940909	+
Merged-chr2-51473384-1	chr2	51473284	51473484	+
Merged-chr2-51893529-1	chr2	51893429	51893629	+
Merged-chrY_random-17314660-1	chrY_random	17314560	17314760	+
Merged-chr2-51927459-1	chr2	51927359	51927559	+
Merged-chrY_random-17333344-1	chrY_random	17333244	17333444	+
Merged-chr2-51929116-1	chr2	51929016	51929216	+
Merged-chrY_random-18953309-1	chrY_random	18953209	18953409	+
Merged-chr2-51930919-1	chr2	51930819	51931019	+
Merged-chrY_random-22225214-1	chrY_random	22225114	22225314	+
Merged-chr2-51943007-1	chr2	51942907	51943107	+
Merged-chrY_random-22623994-1	chrY_random	22623894	22624094	+
Merged-chrY_random-22638939-1	chrY_random	22638839	22639039	+
Merged-chrY_random-24172505-1	chrY_random	24172405	24172605	+
Merged-chrY_random-25876702-1	chrY_random	25876602	25876802	+
Merged-chrY_random-29190147-1	chrY_random	29190047	29190247	+
Merged-chrY_random-32168809-1	chrY_random	32168709	32168909	+
Merged-chr2-51984190-1	chr2	51984090	51984290	+
Merged-chr2-52083635-1	chr2	52083535	52083735	+
Merged-chr2-52413233-1	chr2	52413133	52413333	+
Merged-chr2-53105845-1	chr2	53105745	53105945	+
Merged-chrY_random-32171799-1	chrY_random	32171699	32171899	+
Merged-chr2-53774926-1	chr2	53774826	53775026	+
Merged-chrY_random-33825151-1	chrY_random	33825051	33825251	+
Merged-chr2-53776672-1	chr2	53776572	53776772	+
Merged-chrY_random-33955030-1	chrY_random	33954930	33955130	+
Merged-chr2-54790171-1	chr2	54790071	54790271	+
Merged-chr2-55062662-1	chr2	55062562	55062762	+
Merged-chrY_random-35438109-1	chrY_random	35438009	35438209	+
Merged-chrY_random-36038261-1	chrY_random	36038161	36038361	+
Merged-chrY_random-38414065-1	chrY_random	38413965	38414165	+
Merged-chrY_random-39674268-1	chrY_random	39674168	39674368	+
Merged-chrY_random-39711655-1	chrY_random	39711555	39711755	+
Merged-chr2-55074545-1	chr2	55074445	55074645	+
Merged-chr2-55345598-1	chr2	55345498	55345698	+
Merged-chr2-55527176-1	chr2	55527076	55527276	+
Merged-chr2-55726232-1	chr2	55726132	55726332	+
Merged-chr2-56155717-1	chr2	56155617	56155817	+
Merged-chr2-56727898-1	chr2	56727798	56727998	+
Merged-chrY_random-40052313-1	chrY_random	40052213	40052413	+
Merged-chr2-56761622-1	chr2	56761522	56761722	+
Merged-chrY_random-40900937-1	chrY_random	40900837	40901037	+
Merged-chr2-57082505-1	chr2	57082405	57082605	+
Merged-chr2-57091470-1	chr2	57091370	57091570	+
Merged-chrY_random-46243477-1	chrY_random	46243377	46243577	+
Merged-chrY_random-48259426-1	chrY_random	48259326	48259526	+
Merged-chrY_random-49784471-1	chrY_random	49784371	49784571	+
Merged-chrY_random-57012178-1	chrY_random	57012078	57012278	+
Merged-chr2-57186117-1	chr2	57186017	57186217	+
Merged-chr2-57406651-1	chr2	57406551	57406751	+
Merged-chr2-57817998-1	chr2	57817898	57818098	+
Merged-chr2-58194519-1	chr2	58194419	58194619	+
Merged-chr2-58457334-1	chr2	58457234	58457434	+
Merged-chr2-58477654-1	chr2	58477554	58477754	+
Merged-chr2-58478362-1	chr2	58478262	58478462	+
Merged-chr2-58527187-1	chr2	58527087	58527287	+
Merged-chr2-58732391-1	chr2	58732291	58732491	+
Merged-chr2-59069681-1	chr2	59069581	59069781	+
Merged-chr2-59223740-1	chr2	59223640	59223840	+
Merged-chr2-59276541-1	chr2	59276441	59276641	+
Merged-chr2-59379763-1	chr2	59379663	59379863	+
Merged-chr2-59460731-1	chr2	59460631	59460831	+
Merged-chr2-59463591-1	chr2	59463491	59463691	+
Merged-chr10-87096321-1	chr10	87096221	87096421	+
Merged-chr10-87431978-1	chr10	87431878	87432078	+
Merged-chr10-87475302-1	chr10	87475202	87475402	+
Merged-chr10-87662953-1	chr10	87662853	87663053	+
Merged-chr10-88010543-1	chr10	88010443	88010643	+
Merged-chr10-88088349-1	chr10	88088249	88088449	+
Merged-chr10-88135072-1	chr10	88134972	88135172	+
Merged-chr10-88171468-1	chr10	88171368	88171568	+
Merged-chr2-59471661-1	chr2	59471561	59471761	+
Merged-chr2-59923006-1	chr2	59922906	59923106	+
Merged-chr2-59974100-1	chr2	59974000	59974200	+
Merged-chr2-60033909-1	chr2	60033809	60034009	+
Merged-chr1-121231728-1	chr1	121231628	121231828	+
Merged-chr1-121244878-1	chr1	121244778	121244978	+
Merged-chr2-60038998-1	chr2	60038898	60039098	+
Merged-chr1-121253676-1	chr1	121253576	121253776	+
Merged-chr2-60071395-1	chr2	60071295	60071495	+
Merged-chr1-121293867-1	chr1	121293767	121293967	+
Merged-chr2-60249414-1	chr2	60249314	60249514	+
Merged-chr1-121295375-1	chr1	121295275	121295475	+
Merged-chr1-121436787-1	chr1	121436687	121436887	+
Merged-chr1-121462601-1	chr1	121462501	121462701	+
Merged-chr10-88429932-1	chr10	88429832	88430032	+
Merged-chr10-88676524-1	chr10	88676424	88676624	+
Merged-chr10-88720116-1	chr10	88720016	88720216	+
Merged-chr10-88803359-1	chr10	88803259	88803459	+
Merged-chr10-88863502-1	chr10	88863402	88863602	+
Merged-chr10-88950318-1	chr10	88950218	88950418	+
Merged-chr10-88998808-1	chr10	88998708	88998908	+
Merged-chr2-60568253-1	chr2	60568153	60568353	+
Merged-chr2-61512783-1	chr2	61512683	61512883	+
Merged-chr2-61558972-1	chr2	61558872	61559072	+
Merged-chr2-61826713-1	chr2	61826613	61826813	+
Merged-chr2-62086981-1	chr2	62086881	62087081	+
Merged-chr2-62246423-1	chr2	62246323	62246523	+
Merged-chr2-62476221-1	chr2	62476121	62476321	+
Merged-chr1-121642240-1	chr1	121642140	121642340	+
Merged-chr2-63211600-1	chr2	63211500	63211700	+
Merged-chr1-122264808-1	chr1	122264708	122264908	+
Merged-chr2-63386661-1	chr2	63386561	63386761	+
Merged-chr1-122358132-1	chr1	122358032	122358232	+
Merged-chr1-122540664-1	chr1	122540564	122540764	+
Merged-chr10-89600417-1	chr10	89600317	89600517	+
Merged-chr10-89714625-1	chr10	89714525	89714725	+
Merged-chr10-89843801-1	chr10	89843701	89843901	+
Merged-chr10-90267465-1	chr10	90267365	90267565	+
Merged-chr10-90489377-1	chr10	90489277	90489477	+
Merged-chr10-90490934-1	chr10	90490834	90491034	+
Merged-chr10-90525259-1	chr10	90525159	90525359	+
Merged-chr10-90587154-1	chr10	90587054	90587254	+
Merged-chr2-63389500-1	chr2	63389400	63389600	+
Merged-chr2-63750031-1	chr2	63749931	63750131	+
Merged-chr2-63766026-1	chr2	63765926	63766126	+
Merged-chr2-64151939-1	chr2	64151839	64152039	+
Merged-chr1-122656182-1	chr1	122656082	122656282	+
Merged-chr2-64540632-1	chr2	64540532	64540732	+
Merged-chr1-122656704-1	chr1	122656604	122656804	+
Merged-chr2-65252053-1	chr2	65251953	65252153	+
Merged-chr1-122993764-1	chr1	122993664	122993864	+
Merged-chr2-65259484-1	chr2	65259384	65259584	+
Merged-chr1-123189298-1	chr1	123189198	123189398	+
Merged-chr2-65417977-1	chr2	65417877	65418077	+
Merged-chr1-123354685-1	chr1	123354585	123354785	+
Merged-chr1-123464680-1	chr1	123464580	123464780	+
Merged-chr1-123521601-1	chr1	123521501	123521701	+
Merged-chr1-123565426-1	chr1	123565326	123565526	+
Merged-chr10-90633303-1	chr10	90633203	90633403	+
Merged-chr10-90643549-1	chr10	90643449	90643649	+
Merged-chr10-90650662-1	chr10	90650562	90650762	+
Merged-chr10-90663485-1	chr10	90663385	90663585	+
Merged-chr10-90881817-1	chr10	90881717	90881917	+
Merged-chr10-91279344-1	chr10	91279244	91279444	+
Merged-chr10-91863535-1	chr10	91863435	91863635	+
Merged-chr2-65622446-1	chr2	65622346	65622546	+
Merged-chr2-65686912-1	chr2	65686812	65687012	+
Merged-chr2-65989673-1	chr2	65989573	65989773	+
Merged-chr1-123674169-1	chr1	123674069	123674269	+
Merged-chr2-66683426-1	chr2	66683326	66683526	+
Merged-chr1-123677692-1	chr1	123677592	123677792	+
Merged-chr2-66978288-1	chr2	66978188	66978388	+
Merged-chr2-66996360-1	chr2	66996260	66996460	+
Merged-chr2-66997317-1	chr2	66997217	66997417	+
Merged-chr1-124962005-1	chr1	124961905	124962105	+
Merged-chr2-67111992-1	chr2	67111892	67112092	+
Merged-chr1-126071529-1	chr1	126071429	126071629	+
Merged-chr1-126654745-1	chr1	126654645	126654845	+
Merged-chr1-126865116-1	chr1	126865016	126865216	+
Merged-chr1-127213780-1	chr1	127213680	127213880	+
Merged-chr1-127246196-1	chr1	127246096	127246296	+
Merged-chr10-92033408-1	chr10	92033308	92033508	+
Merged-chr10-92100031-1	chr10	92099931	92100131	+
Merged-chr10-92215050-1	chr10	92214950	92215150	+
Merged-chr10-92270932-1	chr10	92270832	92271032	+
Merged-chr10-92280026-1	chr10	92279926	92280126	+
Merged-chr10-92335628-1	chr10	92335528	92335728	+
Merged-chr10-92373456-1	chr10	92373356	92373556	+
Merged-chr10-92412977-1	chr10	92412877	92413077	+
Merged-chr10-92531973-1	chr10	92531873	92532073	+
Merged-chr2-67428679-1	chr2	67428579	67428779	+
Merged-chr2-67981552-1	chr2	67981452	67981652	+
Merged-chr2-67994545-1	chr2	67994445	67994645	+
Merged-chr2-68136381-1	chr2	68136281	68136481	+
Merged-chr1-127429969-1	chr1	127429869	127430069	+
Merged-chr2-68673233-1	chr2	68673133	68673333	+
Merged-chr1-127584803-1	chr1	127584703	127584903	+
Merged-chr2-68726977-1	chr2	68726877	68727077	+
Merged-chr1-127612039-1	chr1	127611939	127612139	+
Merged-chr2-68763747-1	chr2	68763647	68763847	+
Merged-chr1-127868819-1	chr1	127868719	127868919	+
Merged-chr1-128266307-1	chr1	128266207	128266407	+
Merged-chr1-128274486-1	chr1	128274386	128274586	+
Merged-chr1-128564861-1	chr1	128564761	128564961	+
Merged-chr1-129064287-1	chr1	129064187	129064387	+
Merged-chr10-92558116-1	chr10	92558016	92558216	+
Merged-chr10-92624834-1	chr10	92624734	92624934	+
Merged-chr10-92628880-1	chr10	92628780	92628980	+
Merged-chr10-92651458-1	chr10	92651358	92651558	+
Merged-chr10-92705126-1	chr10	92705026	92705226	+
Merged-chr10-92741235-1	chr10	92741135	92741335	+
Merged-chr10-92754439-1	chr10	92754339	92754539	+
Merged-chr10-92882618-1	chr10	92882518	92882718	+
Merged-chr1-129067656-1	chr1	129067556	129067756	+
Merged-chr1-129461589-1	chr1	129461489	129461689	+
Merged-chr1-129677610-1	chr1	129677510	129677710	+
Merged-chr1-129801606-1	chr1	129801506	129801706	+
Merged-chr1-129999290-1	chr1	129999190	129999390	+
Merged-chr1-130297185-1	chr1	130297085	130297285	+
Merged-chr1-130756845-1	chr1	130756745	130756945	+
Merged-chr10-93083727-1	chr10	93083627	93083827	+
Merged-chr10-93127642-1	chr10	93127542	93127742	+
Merged-chr1-130786643-1	chr1	130786543	130786743	+
Merged-chr1-130828654-1	chr1	130828554	130828754	+
Merged-chr1-130898593-1	chr1	130898493	130898693	+
Merged-chr1-131232778-1	chr1	131232678	131232878	+
Merged-chr1-132248684-1	chr1	132248584	132248784	+
Merged-chr1-132390283-1	chr1	132390183	132390383	+
Merged-chr1-132399261-1	chr1	132399161	132399361	+
Merged-chr10-93661648-1	chr10	93661548	93661748	+
Merged-chr10-94390652-1	chr10	94390552	94390752	+
Merged-chr10-94579336-1	chr10	94579236	94579436	+
Merged-chr10-94775702-1	chr10	94775602	94775802	+
Merged-chr10-94786732-1	chr10	94786632	94786832	+
Merged-chr10-94799802-1	chr10	94799702	94799902	+
Merged-chr1-132431394-1	chr1	132431294	132431494	+
Merged-chr1-132446149-1	chr1	132446049	132446249	+
Merged-chr1-132634500-1	chr1	132634400	132634600	+
Merged-chr1-132674629-1	chr1	132674529	132674729	+
Merged-chr1-132722685-1	chr1	132722585	132722785	+
Merged-chr1-133009316-1	chr1	133009216	133009416	+
Merged-chr1-133029728-1	chr1	133029628	133029828	+
Merged-chr1-133036029-1	chr1	133035929	133036129	+
Merged-chr1-133047080-1	chr1	133046980	133047180	+
Merged-chr1-133235529-1	chr1	133235429	133235629	+
Merged-chr10-94879534-1	chr10	94879434	94879634	+
Merged-chr10-94952467-1	chr10	94952367	94952567	+
Merged-chr10-95020301-1	chr10	95020201	95020401	+
Merged-chr10-95023125-1	chr10	95023025	95023225	+
Merged-chr10-95059127-1	chr10	95059027	95059227	+
Merged-chr10-95063284-1	chr10	95063184	95063384	+
Merged-chr1-133375603-1	chr1	133375503	133375703	+
Merged-chr1-133433240-1	chr1	133433140	133433340	+
Merged-chr1-133462894-1	chr1	133462794	133462994	+
Merged-chr1-133510177-1	chr1	133510077	133510277	+
Merged-chr1-133782638-1	chr1	133782538	133782738	+
Merged-chr1-133787081-1	chr1	133786981	133787181	+
Merged-chr1-133788167-1	chr1	133788067	133788267	+
Merged-chr1-133805039-1	chr1	133804939	133805139	+
Merged-chr10-95105845-1	chr10	95105745	95105945	+
Merged-chr10-95122394-1	chr10	95122294	95122494	+
Merged-chr10-95163212-1	chr10	95163112	95163312	+
Merged-chr10-95165361-1	chr10	95165261	95165461	+
Merged-chr10-95325795-1	chr10	95325695	95325895	+
Merged-chr10-95346426-1	chr10	95346326	95346526	+
Merged-chr10-95348116-1	chr10	95348016	95348216	+
Merged-chr10-95355161-1	chr10	95355061	95355261	+
Merged-chr10-95357574-1	chr10	95357474	95357674	+
Merged-chr1-133806755-1	chr1	133806655	133806855	+
Merged-chr1-133897239-1	chr1	133897139	133897339	+
Merged-chr1-134162458-1	chr1	134162358	134162558	+
Merged-chr1-134420758-1	chr1	134420658	134420858	+
Merged-chr6-87962828-1	chr6	87962728	87962928	+
Merged-chr6-87987793-1	chr6	87987693	87987893	+
Merged-chr6-88025009-1	chr6	88024909	88025109	+
Merged-chr6-88074679-1	chr6	88074579	88074779	+
Merged-chr6-88139755-1	chr6	88139655	88139855	+
Merged-chr6-88165240-1	chr6	88165140	88165340	+
Merged-chr6-88415051-1	chr6	88414951	88415151	+
Merged-chr6-88518151-1	chr6	88518051	88518251	+
Merged-chr6-88522872-1	chr6	88522772	88522972	+
Merged-chr6-88641116-1	chr6	88641016	88641216	+
Merged-chr6-89235496-1	chr6	89235396	89235596	+
Merged-chr6-89360317-1	chr6	89360217	89360417	+
Merged-chr6-89458853-1	chr6	89458753	89458953	+
Merged-chr7-93491876-1	chr7	93491776	93491976	+
Merged-chr7-93823170-1	chr7	93823070	93823270	+
Merged-chr7-93964044-1	chr7	93963944	93964144	+
Merged-chr7-94022145-1	chr7	94022045	94022245	+
Merged-chr7-94134400-1	chr7	94134300	94134500	+
Merged-chr6-89786104-1	chr6	89786004	89786204	+
Merged-chr7-94136226-1	chr7	94136126	94136326	+
Merged-chr6-89810008-1	chr6	89809908	89810108	+
Merged-chr6-89982161-1	chr6	89982061	89982261	+
Merged-chr6-90263328-1	chr6	90263228	90263428	+
Merged-chr7-94262323-1	chr7	94262223	94262423	+
Merged-chr6-90372675-1	chr6	90372575	90372775	+
Merged-chr6-90391766-1	chr6	90391666	90391866	+
Merged-chr6-90402603-1	chr6	90402503	90402703	+
Merged-chr6-90482904-1	chr6	90482804	90483004	+
Merged-chr6-90585703-1	chr6	90585603	90585803	+
Merged-chr7-95196070-1	chr7	95195970	95196170	+
Merged-chr7-95408049-1	chr7	95407949	95408149	+
Merged-chr7-95554027-1	chr7	95553927	95554127	+
Merged-chr7-95578424-1	chr7	95578324	95578524	+
Merged-chr7-95983072-1	chr7	95982972	95983172	+
Merged-chr6-91071029-1	chr6	91070929	91071129	+
Merged-chr6-91246309-1	chr6	91246209	91246409	+
Merged-chr7-96423642-1	chr7	96423542	96423742	+
Merged-chr6-91466015-1	chr6	91465915	91466115	+
Merged-chr7-96490675-1	chr7	96490575	96490775	+
Merged-chr6-91619565-1	chr6	91619465	91619665	+
Merged-chr7-96709626-1	chr7	96709526	96709726	+
Merged-chr6-91628732-1	chr6	91628632	91628832	+
Merged-chr7-96836688-1	chr7	96836588	96836788	+
Merged-chr6-91651325-1	chr6	91651225	91651425	+
Merged-chr6-92133213-1	chr6	92133113	92133313	+
Merged-chr7-96921644-1	chr7	96921544	96921744	+
Merged-chr7-96960842-1	chr7	96960742	96960942	+
Merged-chr7-97089855-1	chr7	97089755	97089955	+
Merged-chr7-97101801-1	chr7	97101701	97101901	+
Merged-chr7-97124271-1	chr7	97124171	97124371	+
Merged-chr7-97125583-1	chr7	97125483	97125683	+
Merged-chr7-97129358-1	chr7	97129258	97129458	+
Merged-chr6-92276284-1	chr6	92276184	92276384	+
Merged-chr7-97132725-1	chr7	97132625	97132825	+
Merged-chr6-92445746-1	chr6	92445646	92445846	+
Merged-chr6-92719632-1	chr6	92719532	92719732	+
Merged-chr6-92761707-1	chr6	92761607	92761807	+
Merged-chr6-93540209-1	chr6	93540109	93540309	+
Merged-chr16-32292051-1	chr16	32291951	32292151	+
Merged-chr16-32299941-1	chr16	32299841	32300041	+
Merged-chr16-32312728-1	chr16	32312628	32312828	+
Merged-chr16-32580022-1	chr16	32579922	32580122	+
Merged-chr16-32608697-1	chr16	32608597	32608797	+
Merged-chr16-32659702-1	chr16	32659602	32659802	+
Merged-chr16-32666667-1	chr16	32666567	32666767	+
Merged-chr7-97172232-1	chr7	97172132	97172332	+
Merged-chr7-97410704-1	chr7	97410604	97410804	+
Merged-chr7-97566656-1	chr7	97566556	97566756	+
Merged-chr7-97591122-1	chr7	97591022	97591222	+
Merged-chr6-93676476-1	chr6	93676376	93676576	+
Merged-chr7-97688313-1	chr7	97688213	97688413	+
Merged-chr6-93707617-1	chr6	93707517	93707717	+
Merged-chr7-97689616-1	chr7	97689516	97689716	+
Merged-chr7-98011038-1	chr7	98010938	98011138	+
Merged-chr6-93823703-1	chr6	93823603	93823803	+
Merged-chr6-93873637-1	chr6	93873537	93873737	+
Merged-chr6-93929437-1	chr6	93929337	93929537	+
Merged-chr6-93953832-1	chr6	93953732	93953932	+
Merged-chr6-94119912-1	chr6	94119812	94120012	+
Merged-chr6-94130850-1	chr6	94130750	94130950	+
Merged-chr16-32740283-1	chr16	32740183	32740383	+
Merged-chr16-32745819-1	chr16	32745719	32745919	+
Merged-chr16-32760337-1	chr16	32760237	32760437	+
Merged-chr16-32826071-1	chr16	32825971	32826171	+
Merged-chr16-33056322-1	chr16	33056222	33056422	+
Merged-chr16-33121799-1	chr16	33121699	33121899	+
Merged-chr16-33142058-1	chr16	33141958	33142158	+
Merged-chr16-33143729-1	chr16	33143629	33143829	+
Merged-chr16-33247081-1	chr16	33246981	33247181	+
Merged-chr16-33379905-1	chr16	33379805	33380005	+
Merged-chr7-98358410-1	chr7	98358310	98358510	+
Merged-chr7-98375160-1	chr7	98375060	98375260	+
Merged-chr7-98411114-1	chr7	98411014	98411214	+
Merged-chr7-98431827-1	chr7	98431727	98431927	+
Merged-chr7-98546647-1	chr7	98546547	98546747	+
Merged-chr6-94201650-1	chr6	94201550	94201750	+
Merged-chr7-99224074-1	chr7	99223974	99224174	+
Merged-chr7-99708921-1	chr7	99708821	99709021	+
Merged-chr6-94246655-1	chr6	94246555	94246755	+
Merged-chr7-99749766-1	chr7	99749666	99749866	+
Merged-chr7-99805008-1	chr7	99804908	99805108	+
Merged-chr6-94705722-1	chr6	94705622	94705822	+
Merged-chr7-100024362-1	chr7	100024262	100024462	+
Merged-chr6-94799765-1	chr6	94799665	94799865	+
Merged-chr6-94968095-1	chr6	94967995	94968195	+
Merged-chr6-94983987-1	chr6	94983887	94984087	+
Merged-chr6-95796113-1	chr6	95796013	95796213	+
Merged-chr16-33395540-1	chr16	33395440	33395640	+
Merged-chr16-33428671-1	chr16	33428571	33428771	+
Merged-chr16-33459679-1	chr16	33459579	33459779	+
Merged-chr16-33508433-1	chr16	33508333	33508533	+
Merged-chr16-33511173-1	chr16	33511073	33511273	+
Merged-chr16-33819008-1	chr16	33818908	33819108	+
Merged-chr16-33844533-1	chr16	33844433	33844633	+
Merged-chr16-33851951-1	chr16	33851851	33852051	+
Merged-chr16-33977343-1	chr16	33977243	33977443	+
Merged-chr7-101534186-1	chr7	101534086	101534286	+
Merged-chr7-101736482-1	chr7	101736382	101736582	+
Merged-chr7-102026067-1	chr7	102025967	102026167	+
Merged-chr6-95813131-1	chr6	95813031	95813231	+
Merged-chr7-102068392-1	chr7	102068292	102068492	+
Merged-chr6-96239852-1	chr6	96239752	96239952	+
Merged-chr6-96407778-1	chr6	96407678	96407878	+
Merged-chr7-103140048-1	chr7	103139948	103140148	+
Merged-chr6-96598991-1	chr6	96598891	96599091	+
Merged-chr7-103210243-1	chr7	103210143	103210343	+
Merged-chr6-96738695-1	chr6	96738595	96738795	+
Merged-chr6-96885964-1	chr6	96885864	96886064	+
Merged-chr6-96913761-1	chr6	96913661	96913861	+
Merged-chr6-97013854-1	chr6	97013754	97013954	+
Merged-chr16-33980065-1	chr16	33979965	33980165	+
Merged-chr16-34087561-1	chr16	34087461	34087661	+
Merged-chr16-34125859-1	chr16	34125759	34125959	+
Merged-chr16-34175829-1	chr16	34175729	34175929	+
Merged-chr16-34668613-1	chr16	34668513	34668713	+
Merged-chr16-35013625-1	chr16	35013525	35013725	+
Merged-chr16-35039073-1	chr16	35038973	35039173	+
Merged-chr16-35237382-1	chr16	35237282	35237482	+
Merged-chr7-103317743-1	chr7	103317643	103317843	+
Merged-chr7-103333793-1	chr7	103333693	103333893	+
Merged-chr7-103345118-1	chr7	103345018	103345218	+
Merged-chr7-103439105-1	chr7	103439005	103439205	+
Merged-chr6-97160781-1	chr6	97160681	97160881	+
Merged-chr7-103472402-1	chr7	103472302	103472502	+
Merged-chr6-97228414-1	chr6	97228314	97228514	+
Merged-chr6-97303002-1	chr6	97302902	97303102	+
Merged-chr7-103820995-1	chr7	103820895	103821095	+
Merged-chr7-103871618-1	chr7	103871518	103871718	+
Merged-chr7-103901488-1	chr7	103901388	103901588	+
Merged-chr6-97367112-1	chr6	97367012	97367212	+
Merged-chr6-97598739-1	chr6	97598639	97598839	+
Merged-chr6-97604251-1	chr6	97604151	97604351	+
Merged-chr6-97609052-1	chr6	97608952	97609152	+
Merged-chr6-97668662-1	chr6	97668562	97668762	+
Merged-chr16-35370972-1	chr16	35370872	35371072	+
Merged-chr16-35444308-1	chr16	35444208	35444408	+
Merged-chr16-35585528-1	chr16	35585428	35585628	+
Merged-chr16-35589009-1	chr16	35588909	35589109	+
Merged-chr16-35729435-1	chr16	35729335	35729535	+
Merged-chr16-35734296-1	chr16	35734196	35734396	+
Merged-chr7-104519618-1	chr7	104519518	104519718	+
Merged-chr7-104548602-1	chr7	104548502	104548702	+
Merged-chr7-104578527-1	chr7	104578427	104578627	+
Merged-chr7-104612041-1	chr7	104611941	104612141	+
Merged-chr6-97907105-1	chr6	97907005	97907205	+
Merged-chr7-104796411-1	chr7	104796311	104796511	+
Merged-chr6-98083143-1	chr6	98083043	98083243	+
Merged-chr7-104896686-1	chr7	104896586	104896786	+
Merged-chr6-98433479-1	chr6	98433379	98433579	+
Merged-chr7-104953265-1	chr7	104953165	104953365	+
Merged-chr6-98477167-1	chr6	98477067	98477267	+
Merged-chr6-98773880-1	chr6	98773780	98773980	+
Merged-chr6-98954883-1	chr6	98954783	98954983	+
Merged-chr16-35867905-1	chr16	35867805	35868005	+
Merged-chr16-35955219-1	chr16	35955119	35955319	+
Merged-chr16-35966631-1	chr16	35966531	35966731	+
Merged-chr16-36091338-1	chr16	36091238	36091438	+
Merged-chr16-36098188-1	chr16	36098088	36098288	+
Merged-chr16-36102549-1	chr16	36102449	36102649	+
Merged-chr7-105121149-1	chr7	105121049	105121249	+
Merged-chr7-105208528-1	chr7	105208428	105208628	+
Merged-chr7-105518532-1	chr7	105518432	105518632	+
Merged-chr7-105918868-1	chr7	105918768	105918968	+
Merged-chr7-105964079-1	chr7	105963979	105964179	+
Merged-chr7-106299992-1	chr7	106299892	106300092	+
Merged-chr7-106410593-1	chr7	106410493	106410693	+
Merged-chr16-36206109-1	chr16	36206009	36206209	+
Merged-chr16-36324936-1	chr16	36324836	36325036	+
Merged-chr16-36329936-1	chr16	36329836	36330036	+
Merged-chr16-36488521-1	chr16	36488421	36488621	+
Merged-chr7-106477622-1	chr7	106477522	106477722	+
Merged-chr7-106612177-1	chr7	106612077	106612277	+
Merged-chr7-106825880-1	chr7	106825780	106825980	+
Merged-chr7-107128187-1	chr7	107128087	107128287	+
Merged-chr7-107287450-1	chr7	107287350	107287550	+
Merged-chr7-107339467-1	chr7	107339367	107339567	+
Merged-chr7-107726401-1	chr7	107726301	107726501	+
Merged-chr16-36674973-1	chr16	36674873	36675073	+
Merged-chr16-36675587-1	chr16	36675487	36675687	+
Merged-chr16-36679348-1	chr16	36679248	36679448	+
Merged-chr16-36708222-1	chr16	36708122	36708322	+
Merged-chr16-36747358-1	chr16	36747258	36747458	+
Merged-chr16-36769886-1	chr16	36769786	36769986	+
Merged-chr16-36877561-1	chr16	36877461	36877661	+
Merged-chr16-37010729-1	chr16	37010629	37010829	+
Merged-chr16-37573356-1	chr16	37573256	37573456	+
Merged-chr16-37682796-1	chr16	37682696	37682896	+
Merged-chr16-37685120-1	chr16	37685020	37685220	+
Merged-chr16-37688504-1	chr16	37688404	37688604	+
Merged-chr16-37947452-1	chr16	37947352	37947552	+
Merged-chr16-38002000-1	chr16	38001900	38002100	+
Merged-chr16-38445136-1	chr16	38445036	38445236	+
Merged-chr16-38471968-1	chr16	38471868	38472068	+
Merged-chr16-38519509-1	chr16	38519409	38519609	+
Merged-chr16-38527529-1	chr16	38527429	38527629	+
Merged-chr16-38536975-1	chr16	38536875	38537075	+
Merged-chr16-38558588-1	chr16	38558488	38558688	+
Merged-chr16-38721007-1	chr16	38720907	38721107	+
Merged-chr16-38832871-1	chr16	38832771	38832971	+
Merged-chr16-40616999-1	chr16	40616899	40617099	+
Merged-chr16-41201561-1	chr16	41201461	41201661	+
Merged-chr16-41491654-1	chr16	41491554	41491754	+
Merged-chr4-144988780-1	chr4	144988680	144988880	+
Merged-chr4-145106098-1	chr4	145105998	145106198	+
Merged-chr4-145176032-1	chr4	145175932	145176132	+
Merged-chr4-145226843-1	chr4	145226743	145226943	+
Merged-chr4-145231467-1	chr4	145231367	145231567	+
Merged-chr4-145326997-1	chr4	145326897	145327097	+
Merged-chr3-129409212-1	chr3	129409112	129409312	+
Merged-chr3-130213527-1	chr3	130213427	130213627	+
Merged-chr3-130292779-1	chr3	130292679	130292879	+
Merged-chr3-130392787-1	chr3	130392687	130392887	+
Merged-chr3-130481733-1	chr3	130481633	130481833	+
Merged-chr3-130724169-1	chr3	130724069	130724269	+
Merged-chr3-130805364-1	chr3	130805264	130805464	+
Merged-chr4-145336078-1	chr4	145335978	145336178	+
Merged-chr4-145341979-1	chr4	145341879	145342079	+
Merged-chr4-145368062-1	chr4	145367962	145368162	+
Merged-chr4-145388246-1	chr4	145388146	145388346	+
Merged-chr4-145415505-1	chr4	145415405	145415605	+
Merged-chr4-145441290-1	chr4	145441190	145441390	+
Merged-chr4-145453849-1	chr4	145453749	145453949	+
Merged-chr4-145460544-1	chr4	145460444	145460644	+
Merged-chr4-145466484-1	chr4	145466384	145466584	+
Merged-chr3-131025452-1	chr3	131025352	131025552	+
Merged-chr3-131042423-1	chr3	131042323	131042523	+
Merged-chr3-131072452-1	chr3	131072352	131072552	+
Merged-chr3-131215829-1	chr3	131215729	131215929	+
Merged-chr3-132236193-1	chr3	132236093	132236293	+
Merged-chr3-132347043-1	chr3	132346943	132347143	+
Merged-chr4-145473297-1	chr4	145473197	145473397	+
Merged-chr4-145569384-1	chr4	145569284	145569484	+
Merged-chr4-145584481-1	chr4	145584381	145584581	+
Merged-chr4-145589952-1	chr4	145589852	145590052	+
Merged-chr4-145611016-1	chr4	145610916	145611116	+
Merged-chr4-145617861-1	chr4	145617761	145617961	+
Merged-chr4-145648789-1	chr4	145648689	145648889	+
Merged-chr4-145685914-1	chr4	145685814	145686014	+
Merged-chr4-145705431-1	chr4	145705331	145705531	+
Merged-chr4-145765851-1	chr4	145765751	145765951	+
Merged-chr3-132490644-1	chr3	132490544	132490744	+
Merged-chr3-132729320-1	chr3	132729220	132729420	+
Merged-chr3-132754857-1	chr3	132754757	132754957	+
Merged-chr3-132787159-1	chr3	132787059	132787259	+
Merged-chr3-132788019-1	chr3	132787919	132788119	+
Merged-chr3-132865369-1	chr3	132865269	132865469	+
Merged-chr3-132913666-1	chr3	132913566	132913766	+
Merged-chr3-132963955-1	chr3	132963855	132964055	+
Merged-chr4-145846954-1	chr4	145846854	145847054	+
Merged-chr4-145851450-1	chr4	145851350	145851550	+
Merged-chr4-145855627-1	chr4	145855527	145855727	+
Merged-chr4-145899588-1	chr4	145899488	145899688	+
Merged-chr4-145930109-1	chr4	145930009	145930209	+
Merged-chr4-145961617-1	chr4	145961517	145961717	+
Merged-chr4-146031150-1	chr4	146031050	146031250	+
Merged-chr4-146066449-1	chr4	146066349	146066549	+
Merged-chr3-133196111-1	chr3	133196011	133196211	+
Merged-chr3-133197253-1	chr3	133197153	133197353	+
Merged-chr3-133207247-1	chr3	133207147	133207347	+
Merged-chr3-133240390-1	chr3	133240290	133240490	+
Merged-chr3-133269737-1	chr3	133269637	133269837	+
Merged-chr3-133472201-1	chr3	133472101	133472301	+
Merged-chr3-133733365-1	chr3	133733265	133733465	+
Merged-chr3-134169213-1	chr3	134169113	134169313	+
Merged-chr3-134198324-1	chr3	134198224	134198424	+
Merged-chr3-134629449-1	chr3	134629349	134629549	+
Merged-chr4-146070899-1	chr4	146070799	146070999	+
Merged-chr4-146091658-1	chr4	146091558	146091758	+
Merged-chr4-146092579-1	chr4	146092479	146092679	+
Merged-chr4-146109217-1	chr4	146109117	146109317	+
Merged-chr4-146120550-1	chr4	146120450	146120650	+
Merged-chr4-146176212-1	chr4	146176112	146176312	+
Merged-chr4-146207533-1	chr4	146207433	146207633	+
Merged-chr4-146220167-1	chr4	146220067	146220267	+
Merged-chr4-146234495-1	chr4	146234395	146234595	+
Merged-chr3-134710193-1	chr3	134710093	134710293	+
Merged-chr3-134841575-1	chr3	134841475	134841675	+
Merged-chr3-135014395-1	chr3	135014295	135014495	+
Merged-chr3-135072500-1	chr3	135072400	135072600	+
Merged-chr3-135103520-1	chr3	135103420	135103620	+
Merged-chr3-135106136-1	chr3	135106036	135106236	+
Merged-chr3-135115330-1	chr3	135115230	135115430	+
Merged-chr3-135130428-1	chr3	135130328	135130528	+
Merged-chr3-135209968-1	chr3	135209868	135210068	+
Merged-chr14-20572301-1	chr14	20572201	20572401	+
Merged-chr14-20593915-1	chr14	20593815	20594015	+
Merged-chr14-20639654-1	chr14	20639554	20639754	+
Merged-chr14-20643199-1	chr14	20643099	20643299	+
Merged-chr14-20677665-1	chr14	20677565	20677765	+
Merged-chr14-20680303-1	chr14	20680203	20680403	+
Merged-chr14-20746618-1	chr14	20746518	20746718	+
Merged-chr14-20806497-1	chr14	20806397	20806597	+
Merged-chr14-20807580-1	chr14	20807480	20807680	+
Merged-chr4-146345918-1	chr4	146345818	146346018	+
Merged-chr4-146350045-1	chr4	146349945	146350145	+
Merged-chr4-146391533-1	chr4	146391433	146391633	+
Merged-chr4-146401650-1	chr4	146401550	146401750	+
Merged-chr4-146444943-1	chr4	146444843	146445043	+
Merged-chr12-88067545-1	chr12	88067445	88067645	+
Merged-chr4-146475487-1	chr4	146475387	146475587	+
Merged-chr4-146482820-1	chr4	146482720	146482920	+
Merged-chr12-88113065-1	chr12	88112965	88113165	+
Merged-chr12-88128343-1	chr12	88128243	88128443	+
Merged-chr12-88137150-1	chr12	88137050	88137250	+
Merged-chr12-88143088-1	chr12	88142988	88143188	+
Merged-chr12-88165448-1	chr12	88165348	88165548	+
Merged-chr12-88172803-1	chr12	88172703	88172903	+
Merged-chr3-135433478-1	chr3	135433378	135433578	+
Merged-chr3-135437917-1	chr3	135437817	135438017	+
Merged-chr3-135781843-1	chr3	135781743	135781943	+
Merged-chr3-135783876-1	chr3	135783776	135783976	+
Merged-chr3-136389793-1	chr3	136389693	136389893	+
Merged-chr3-137264587-1	chr3	137264487	137264687	+
Merged-chr3-137285242-1	chr3	137285142	137285342	+
Merged-chr3-137323874-1	chr3	137323774	137323974	+
Merged-chr3-137333540-1	chr3	137333440	137333640	+
Merged-chr14-20846984-1	chr14	20846884	20847084	+
Merged-chr14-20901898-1	chr14	20901798	20901998	+
Merged-chr14-21106046-1	chr14	21105946	21106146	+
Merged-chr14-21113834-1	chr14	21113734	21113934	+
Merged-chr14-21167286-1	chr14	21167186	21167386	+
Merged-chr14-21365945-1	chr14	21365845	21366045	+
Merged-chr14-21492279-1	chr14	21492179	21492379	+
Merged-chr14-21493208-1	chr14	21493108	21493308	+
Merged-chr4-146506995-1	chr4	146506895	146507095	+
Merged-chr4-146550534-1	chr4	146550434	146550634	+
Merged-chr4-146576244-1	chr4	146576144	146576344	+
Merged-chr4-146578430-1	chr4	146578330	146578530	+
Merged-chr4-146604399-1	chr4	146604299	146604499	+
Merged-chr4-146606877-1	chr4	146606777	146606977	+
Merged-chr4-146646073-1	chr4	146645973	146646173	+
Merged-chr12-88226818-1	chr12	88226718	88226918	+
Merged-chr4-146648712-1	chr4	146648612	146648812	+
Merged-chr12-88241803-1	chr12	88241703	88241903	+
Merged-chr4-146668894-1	chr4	146668794	146668994	+
Merged-chr4-146680178-1	chr4	146680078	146680278	+
Merged-chr12-88266195-1	chr12	88266095	88266295	+
Merged-chr12-88283095-1	chr12	88282995	88283195	+
Merged-chr12-88547032-1	chr12	88546932	88547132	+
Merged-chr12-88784973-1	chr12	88784873	88785073	+
Merged-chr3-137334044-1	chr3	137333944	137334144	+
Merged-chr3-137447523-1	chr3	137447423	137447623	+
Merged-chr3-137496432-1	chr3	137496332	137496532	+
Merged-chr3-137529046-1	chr3	137528946	137529146	+
Merged-chr3-137617804-1	chr3	137617704	137617904	+
Merged-chr3-137640401-1	chr3	137640301	137640501	+
Merged-chr3-137654227-1	chr3	137654127	137654327	+
Merged-chr14-21543562-1	chr14	21543462	21543662	+
Merged-chr14-21650237-1	chr14	21650137	21650337	+
Merged-chr14-21668589-1	chr14	21668489	21668689	+
Merged-chr14-21786422-1	chr14	21786322	21786522	+
Merged-chr14-21908168-1	chr14	21908068	21908268	+
Merged-chr14-22180470-1	chr14	22180370	22180570	+
Merged-chr14-22305566-1	chr14	22305466	22305666	+
Merged-chr14-22306643-1	chr14	22306543	22306743	+
Merged-chr4-146684540-1	chr4	146684440	146684640	+
Merged-chr4-146686412-1	chr4	146686312	146686512	+
Merged-chr4-146736444-1	chr4	146736344	146736544	+
Merged-chr4-146791427-1	chr4	146791327	146791527	+
Merged-chr4-146819751-1	chr4	146819651	146819851	+
Merged-chr12-88812569-1	chr12	88812469	88812669	+
Merged-chr4-146825618-1	chr4	146825518	146825718	+
Merged-chr4-146844377-1	chr4	146844277	146844477	+
Merged-chr12-88977705-1	chr12	88977605	88977805	+
Merged-chr4-146868255-1	chr4	146868155	146868355	+
Merged-chr12-89072984-1	chr12	89072884	89073084	+
Merged-chr4-146922486-1	chr4	146922386	146922586	+
Merged-chr12-89269155-1	chr12	89269055	89269255	+
Merged-chr12-89283855-1	chr12	89283755	89283955	+
Merged-chr12-89391439-1	chr12	89391339	89391539	+
Merged-chr12-89578753-1	chr12	89578653	89578853	+
Merged-chr12-89579959-1	chr12	89579859	89580059	+
Merged-chr12-89844478-1	chr12	89844378	89844578	+
Merged-chr3-137806338-1	chr3	137806238	137806438	+
Merged-chr3-138060789-1	chr3	138060689	138060889	+
Merged-chr3-138062701-1	chr3	138062601	138062801	+
Merged-chr3-138098633-1	chr3	138098533	138098733	+
Merged-chr3-138192283-1	chr3	138192183	138192383	+
Merged-chr3-138218805-1	chr3	138218705	138218905	+
Merged-chr3-138288160-1	chr3	138288060	138288260	+
Merged-chr3-138331625-1	chr3	138331525	138331725	+
Merged-chr14-22359876-1	chr14	22359776	22359976	+
Merged-chr14-22406426-1	chr14	22406326	22406526	+
Merged-chr14-22608024-1	chr14	22607924	22608124	+
Merged-chr14-22632247-1	chr14	22632147	22632347	+
Merged-chr14-24217172-1	chr14	24217072	24217272	+
Merged-chr14-24231240-1	chr14	24231140	24231340	+
Merged-chr4-146923427-1	chr4	146923327	146923527	+
Merged-chr4-146929245-1	chr4	146929145	146929345	+
Merged-chr4-147049070-1	chr4	147048970	147049170	+
Merged-chr4-147065950-1	chr4	147065850	147066050	+
Merged-chr4-147070935-1	chr4	147070835	147071035	+
Merged-chr12-89947833-1	chr12	89947733	89947933	+
Merged-chr4-147073834-1	chr4	147073734	147073934	+
Merged-chr4-147106373-1	chr4	147106273	147106473	+
Merged-chr12-90654198-1	chr12	90654098	90654298	+
Merged-chr4-147119267-1	chr4	147119167	147119367	+
Merged-chr12-90980826-1	chr12	90980726	90980926	+
Merged-chr12-91315919-1	chr12	91315819	91316019	+
Merged-chr12-91346894-1	chr12	91346794	91346994	+
Merged-chr12-91992203-1	chr12	91992103	91992303	+
Merged-chr12-92005987-1	chr12	92005887	92006087	+
Merged-chr12-92214968-1	chr12	92214868	92215068	+
Merged-chr3-138396284-1	chr3	138396184	138396384	+
Merged-chr3-138478330-1	chr3	138478230	138478430	+
Merged-chr3-139031329-1	chr3	139031229	139031429	+
Merged-chr3-139683502-1	chr3	139683402	139683602	+
Merged-chr3-140380080-1	chr3	140379980	140380180	+
Merged-chr14-24382646-1	chr14	24382546	24382746	+
Merged-chr14-24672927-1	chr14	24672827	24673027	+
Merged-chr14-24760499-1	chr14	24760399	24760599	+
Merged-chr14-25073032-1	chr14	25072932	25073132	+
Merged-chr14-25149804-1	chr14	25149704	25149904	+
Merged-chr14-25202580-1	chr14	25202480	25202680	+
Merged-chr14-25224347-1	chr14	25224247	25224447	+
Merged-chr14-25301654-1	chr14	25301554	25301754	+
Merged-chr14-25306412-1	chr14	25306312	25306512	+
Merged-chr4-147149631-1	chr4	147149531	147149731	+
Merged-chr4-147167973-1	chr4	147167873	147168073	+
Merged-chr4-147214065-1	chr4	147213965	147214165	+
Merged-chr4-147222649-1	chr4	147222549	147222749	+
Merged-chr4-147415119-1	chr4	147415019	147415219	+
Merged-chr12-92638802-1	chr12	92638702	92638902	+
Merged-chr4-147456770-1	chr4	147456670	147456870	+
Merged-chr12-92796238-1	chr12	92796138	92796338	+
Merged-chr4-147458773-1	chr4	147458673	147458873	+
Merged-chr12-92821996-1	chr12	92821896	92822096	+
Merged-chr4-147463682-1	chr4	147463582	147463782	+
Merged-chr12-92826972-1	chr12	92826872	92827072	+
Merged-chr4-147491067-1	chr4	147490967	147491167	+
Merged-chr12-92828278-1	chr12	92828178	92828378	+
Merged-chr12-92830056-1	chr12	92829956	92830156	+
Merged-chr12-93116367-1	chr12	93116267	93116467	+
Merged-chr12-93179674-1	chr12	93179574	93179774	+
Merged-chr12-94055371-1	chr12	94055271	94055471	+
Merged-chr12-94342542-1	chr12	94342442	94342642	+
Merged-chr3-140432790-1	chr3	140432690	140432890	+
Merged-chr3-141328835-1	chr3	141328735	141328935	+
Merged-chr3-141427520-1	chr3	141427420	141427620	+
Merged-chr3-142340563-1	chr3	142340463	142340663	+
Merged-chr3-142368712-1	chr3	142368612	142368812	+
Merged-chr3-142407251-1	chr3	142407151	142407351	+
Merged-chr3-142423448-1	chr3	142423348	142423548	+
Merged-chr14-25463484-1	chr14	25463384	25463584	+
Merged-chr14-26212357-1	chr14	26212257	26212457	+
Merged-chr14-26485437-1	chr14	26485337	26485537	+
Merged-chr12-94557886-1	chr12	94557786	94557986	+
Merged-chr12-94748245-1	chr12	94748145	94748345	+
Merged-chr12-94780596-1	chr12	94780496	94780696	+
Merged-chr12-94907860-1	chr12	94907760	94907960	+
Merged-chr12-95126483-1	chr12	95126383	95126583	+
Merged-chr12-95199278-1	chr12	95199178	95199378	+
Merged-chr12-95281205-1	chr12	95281105	95281305	+
Merged-chr12-95428963-1	chr12	95428863	95429063	+
Merged-chr14-26644746-1	chr14	26644646	26644846	+
Merged-chr14-26683940-1	chr14	26683840	26684040	+
Merged-chr14-26794360-1	chr14	26794260	26794460	+
Merged-chr14-26934074-1	chr14	26933974	26934174	+
Merged-chr14-27073786-1	chr14	27073686	27073886	+
Merged-chr14-27255969-1	chr14	27255869	27256069	+
Merged-chr14-27305136-1	chr14	27305036	27305236	+
Merged-chr14-27424938-1	chr14	27424838	27425038	+
Merged-chr14-27471475-1	chr14	27471375	27471575	+
Merged-chr14-27503088-1	chr14	27502988	27503188	+
Merged-chr12-96945509-1	chr12	96945409	96945609	+
Merged-chr12-97471460-1	chr12	97471360	97471560	+
Merged-chr12-98087796-1	chr12	98087696	98087896	+
Merged-chr12-99184055-1	chr12	99183955	99184155	+
Merged-chr12-99378350-1	chr12	99378250	99378450	+
Merged-chr12-99557361-1	chr12	99557261	99557461	+
Merged-chr12-99593873-1	chr12	99593773	99593973	+
Merged-chr12-99594865-1	chr12	99594765	99594965	+
Merged-chr14-27674385-1	chr14	27674285	27674485	+
Merged-chr14-27819988-1	chr14	27819888	27820088	+
Merged-chr14-27844488-1	chr14	27844388	27844588	+
Merged-chr14-27944051-1	chr14	27943951	27944151	+
Merged-chr14-28086300-1	chr14	28086200	28086400	+
Merged-chr12-100262998-1	chr12	100262898	100263098	+
Merged-chr12-100598062-1	chr12	100597962	100598162	+
Merged-chr12-100815359-1	chr12	100815259	100815459	+
Merged-chr12-101004425-1	chr12	101004325	101004525	+
Merged-chr14-28162103-1	chr14	28162003	28162203	+
Merged-chr14-28249978-1	chr14	28249878	28250078	+
Merged-chr14-28332054-1	chr14	28331954	28332154	+
Merged-chr14-28337882-1	chr14	28337782	28337982	+
Merged-chr14-28442967-1	chr14	28442867	28443067	+
Merged-chr14-28483263-1	chr14	28483163	28483363	+
Merged-chr14-28699586-1	chr14	28699486	28699686	+
Merged-chr14-29000633-1	chr14	29000533	29000733	+
Merged-chr14-29052010-1	chr14	29051910	29052110	+
Merged-chr12-101425855-1	chr12	101425755	101425955	+
Merged-chr12-101772420-1	chr12	101772320	101772520	+
Merged-chr12-101774524-1	chr12	101774424	101774624	+
Merged-chr12-101963899-1	chr12	101963799	101963999	+
Merged-chr12-102039832-1	chr12	102039732	102039932	+
Merged-chr12-102190609-1	chr12	102190509	102190709	+
Merged-chr14-29189256-1	chr14	29189156	29189356	+
Merged-chr14-29326241-1	chr14	29326141	29326341	+
Merged-chr14-29429151-1	chr14	29429051	29429251	+
Merged-chr14-29662563-1	chr14	29662463	29662663	+
Merged-chr14-29774864-1	chr14	29774764	29774964	+
Merged-chr14-30356177-1	chr14	30356077	30356277	+
Merged-chr14-30575159-1	chr14	30575059	30575259	+
Merged-chr14-30584497-1	chr14	30584397	30584597	+
Merged-chr14-30764344-1	chr14	30764244	30764444	+
Merged-chr14-31145194-1	chr14	31145094	31145294	+
Merged-chr12-102234624-1	chr12	102234524	102234724	+
Merged-chr12-102267682-1	chr12	102267582	102267782	+
Merged-chr12-102319155-1	chr12	102319055	102319255	+
Merged-chr12-102344468-1	chr12	102344368	102344568	+
Merged-chr12-102348232-1	chr12	102348132	102348332	+
Merged-chr12-102375972-1	chr12	102375872	102376072	+
Merged-chr12-102550196-1	chr12	102550096	102550296	+
Merged-chr12-102586173-1	chr12	102586073	102586273	+
Merged-chr12-102686636-1	chr12	102686536	102686736	+
Merged-chr9-67920576-1	chr9	67920476	67920676	+
Merged-chr9-67998660-1	chr9	67998560	67998760	+
Merged-chr9-68369082-1	chr9	68368982	68369182	+
Merged-chr9-68465167-1	chr9	68465067	68465267	+
Merged-chr9-68495952-1	chr9	68495852	68496052	+
Merged-chr9-68646257-1	chr9	68646157	68646357	+
Merged-chr9-69008749-1	chr9	69008649	69008849	+
Merged-chr9-69149983-1	chr9	69149883	69150083	+
Merged-chr9-69220864-1	chr9	69220764	69220964	+
Merged-chr9-69267347-1	chr9	69267247	69267447	+
Merged-chr9-69328236-1	chr9	69328136	69328336	+
Merged-chr9-69663001-1	chr9	69662901	69663101	+
Merged-chr9-69932880-1	chr9	69932780	69932980	+
Merged-chr9-69935478-1	chr9	69935378	69935578	+
Merged-chr9-69993458-1	chr9	69993358	69993558	+
Merged-chr2-69060283-1	chr2	69060183	69060383	+
Merged-chr2-69138935-1	chr2	69138835	69139035	+
Merged-chr2-69146511-1	chr2	69146411	69146611	+
Merged-chr2-69382364-1	chr2	69382264	69382464	+
Merged-chr2-69393687-1	chr2	69393587	69393787	+
Merged-chr2-69412827-1	chr2	69412727	69412927	+
Merged-chr2-69473975-1	chr2	69473875	69474075	+
Merged-chr2-69965882-1	chr2	69965782	69965982	+
Merged-chr18-29179696-1	chr18	29179596	29179796	+
Merged-chr18-29356243-1	chr18	29356143	29356343	+
Merged-chr18-29910510-1	chr18	29910410	29910610	+
Merged-chr18-30175357-1	chr18	30175257	30175457	+
Merged-chr9-70039967-1	chr9	70039867	70040067	+
Merged-chr9-70057668-1	chr9	70057568	70057768	+
Merged-chr9-70096606-1	chr9	70096506	70096706	+
Merged-chr9-70105329-1	chr9	70105229	70105429	+
Merged-chr18-30896734-1	chr18	30896634	30896834	+
Merged-chr9-70125595-1	chr9	70125495	70125695	+
Merged-chr18-31237477-1	chr18	31237377	31237577	+
Merged-chr9-70140602-1	chr9	70140502	70140702	+
Merged-chr9-70264252-1	chr9	70264152	70264352	+
Merged-chr9-70342345-1	chr9	70342245	70342445	+
Merged-chr2-70048003-1	chr2	70047903	70048103	+
Merged-chr2-70107584-1	chr2	70107484	70107684	+
Merged-chr2-70457336-1	chr2	70457236	70457436	+
Merged-chr2-70458492-1	chr2	70458392	70458592	+
Merged-chr2-70499434-1	chr2	70499334	70499534	+
Merged-chr2-70559797-1	chr2	70559697	70559897	+
Merged-chr2-70668982-1	chr2	70668882	70669082	+
Merged-chr18-31413651-1	chr18	31413551	31413751	+
Merged-chr18-31519177-1	chr18	31519077	31519277	+
Merged-chr18-31677159-1	chr18	31677059	31677259	+
Merged-chr18-31728025-1	chr18	31727925	31728125	+
Merged-chr9-71209327-1	chr9	71209227	71209427	+
Merged-chr9-71402054-1	chr9	71401954	71402154	+
Merged-chr9-71727521-1	chr9	71727421	71727621	+
Merged-chr2-70790228-1	chr2	70790128	70790328	+
Merged-chr2-71005569-1	chr2	71005469	71005669	+
Merged-chr2-71049558-1	chr2	71049458	71049658	+
Merged-chr2-71081427-1	chr2	71081327	71081527	+
Merged-chr2-71316120-1	chr2	71316020	71316220	+
Merged-chr2-71322273-1	chr2	71322173	71322373	+
Merged-chr2-71367902-1	chr2	71367802	71368002	+
Merged-chr18-32274292-1	chr18	32274192	32274392	+
Merged-chr18-33176006-1	chr18	33175906	33176106	+
Merged-chr9-71838272-1	chr9	71838172	71838372	+
Merged-chr18-33572221-1	chr18	33572121	33572321	+
Merged-chr18-33894242-1	chr18	33894142	33894342	+
Merged-chr9-72385099-1	chr9	72384999	72385199	+
Merged-chr18-33954459-1	chr18	33954359	33954559	+
Merged-chr9-72386474-1	chr9	72386374	72386574	+
Merged-chr18-33966748-1	chr18	33966648	33966848	+
Merged-chr9-72466011-1	chr9	72465911	72466111	+
Merged-chr9-72487252-1	chr9	72487152	72487352	+
Merged-chr9-72488390-1	chr9	72488290	72488490	+
Merged-chr9-72505836-1	chr9	72505736	72505936	+
Merged-chr9-72512521-1	chr9	72512421	72512621	+
Merged-chr9-72513500-1	chr9	72513400	72513600	+
Merged-chr2-71493829-1	chr2	71493729	71493929	+
Merged-chr2-71542687-1	chr2	71542587	71542787	+
Merged-chr2-71563714-1	chr2	71563614	71563814	+
Merged-chr2-71643289-1	chr2	71643189	71643389	+
Merged-chr2-71704942-1	chr2	71704842	71705042	+
Merged-chr2-71705800-1	chr2	71705700	71705900	+
Merged-chr2-71786102-1	chr2	71786002	71786202	+
Merged-chr18-33995735-1	chr18	33995635	33995835	+
Merged-chr18-34158185-1	chr18	34158085	34158285	+
Merged-chr18-34177634-1	chr18	34177534	34177734	+
Merged-chr18-34183973-1	chr18	34183873	34184073	+
Merged-chr9-72517524-1	chr9	72517424	72517624	+
Merged-chr9-72520378-1	chr9	72520278	72520478	+
Merged-chr18-34251157-1	chr18	34251057	34251257	+
Merged-chr9-72635800-1	chr9	72635700	72635900	+
Merged-chr9-72656170-1	chr9	72656070	72656270	+
Merged-chr18-34282158-1	chr18	34282058	34282258	+
Merged-chr18-34343151-1	chr18	34343051	34343251	+
Merged-chr9-72682152-1	chr9	72682052	72682252	+
Merged-chr9-72719775-1	chr9	72719675	72719875	+
Merged-chr9-72844410-1	chr9	72844310	72844510	+
Merged-chr9-72918942-1	chr9	72918842	72919042	+
Merged-chr9-72927835-1	chr9	72927735	72927935	+
Merged-chr2-71786865-1	chr2	71786765	71786965	+
Merged-chr2-71873454-1	chr2	71873354	71873554	+
Merged-chr2-71932360-1	chr2	71932260	71932460	+
Merged-chr2-71945912-1	chr2	71945812	71946012	+
Merged-chr2-71975256-1	chr2	71975156	71975356	+
Merged-chr2-72113311-1	chr2	72113211	72113411	+
Merged-chr2-72313945-1	chr2	72313845	72314045	+
Merged-chr2-72346209-1	chr2	72346109	72346309	+
Merged-chr18-34490312-1	chr18	34490212	34490412	+
Merged-chr18-34490821-1	chr18	34490721	34490921	+
Merged-chr18-34533454-1	chr18	34533354	34533554	+
Merged-chr18-34565165-1	chr18	34565065	34565265	+
Merged-chr9-72954767-1	chr9	72954667	72954867	+
Merged-chr9-72960854-1	chr9	72960754	72960954	+
Merged-chr18-34631125-1	chr18	34631025	34631225	+
Merged-chr9-73246619-1	chr9	73246519	73246719	+
Merged-chr18-34701743-1	chr18	34701643	34701843	+
Merged-chr9-73253565-1	chr9	73253465	73253665	+
Merged-chr18-34711540-1	chr18	34711440	34711640	+
Merged-chr18-34918994-1	chr18	34918894	34919094	+
Merged-chr9-73785077-1	chr9	73784977	73785177	+
Merged-chr9-73921621-1	chr9	73921521	73921721	+
Merged-chr9-74187433-1	chr9	74187333	74187533	+
Merged-chr9-74482013-1	chr9	74481913	74482113	+
Merged-chr10-95624098-1	chr10	95623998	95624198	+
Merged-chr10-95655345-1	chr10	95655245	95655445	+
Merged-chr10-95661819-1	chr10	95661719	95661919	+
Merged-chr10-95941880-1	chr10	95941780	95941980	+
Merged-chr10-96093967-1	chr10	96093867	96094067	+
Merged-chr10-96784767-1	chr10	96784667	96784867	+
Merged-chr2-72782995-1	chr2	72782895	72783095	+
Merged-chr2-72794644-1	chr2	72794544	72794744	+
Merged-chr2-72799978-1	chr2	72799878	72800078	+
Merged-chr1-134437763-1	chr1	134437663	134437863	+
Merged-chr2-72859538-1	chr2	72859438	72859638	+
Merged-chr1-134509737-1	chr1	134509637	134509837	+
Merged-chr2-72879765-1	chr2	72879665	72879865	+
Merged-chr2-72892577-1	chr2	72892477	72892677	+
Merged-chr1-134696091-1	chr1	134695991	134696191	+
Merged-chr2-73086978-1	chr2	73086878	73087078	+
Merged-chr1-134806635-1	chr1	134806535	134806735	+
Merged-chr1-134816400-1	chr1	134816300	134816500	+
Merged-chr1-134878296-1	chr1	134878196	134878396	+
Merged-chr1-134909336-1	chr1	134909236	134909436	+
Merged-chr18-35009890-1	chr18	35009790	35009990	+
Merged-chr18-35225508-1	chr18	35225408	35225608	+
Merged-chr9-74696894-1	chr9	74696794	74696994	+
Merged-chr9-74716255-1	chr9	74716155	74716355	+
Merged-chr9-74809233-1	chr9	74809133	74809333	+
Merged-chr18-35614881-1	chr18	35614781	35614981	+
Merged-chr9-74845861-1	chr9	74845761	74845961	+
Merged-chr18-35627538-1	chr18	35627438	35627638	+
Merged-chr9-75135403-1	chr9	75135303	75135503	+
Merged-chr18-35684861-1	chr18	35684761	35684961	+
Merged-chr9-75412871-1	chr9	75412771	75412971	+
Merged-chr9-75578755-1	chr9	75578655	75578855	+
Merged-chr9-76034767-1	chr9	76034667	76034867	+
Merged-chr10-98562863-1	chr10	98562763	98562963	+
Merged-chr10-98565721-1	chr10	98565621	98565821	+
Merged-chr10-98670086-1	chr10	98669986	98670186	+
Merged-chr10-98725858-1	chr10	98725758	98725958	+
Merged-chr10-98756014-1	chr10	98755914	98756114	+
Merged-chr10-98761462-1	chr10	98761362	98761562	+
Merged-chr10-98802321-1	chr10	98802221	98802421	+
Merged-chr2-73114476-1	chr2	73114376	73114576	+
Merged-chr2-73168035-1	chr2	73167935	73168135	+
Merged-chr2-73604904-1	chr2	73604804	73605004	+
Merged-chr2-73665067-1	chr2	73664967	73665167	+
Merged-chr1-134916988-1	chr1	134916888	134917088	+
Merged-chr2-73698394-1	chr2	73698294	73698494	+
Merged-chr1-134918139-1	chr1	134918039	134918239	+
Merged-chr2-73961717-1	chr2	73961617	73961817	+
Merged-chr1-134922090-1	chr1	134921990	134922190	+
Merged-chr2-73992159-1	chr2	73992059	73992259	+
Merged-chr1-134930562-1	chr1	134930462	134930662	+
Merged-chr2-74276382-1	chr2	74276282	74276482	+
Merged-chr1-134992213-1	chr1	134992113	134992313	+
Merged-chr1-134998228-1	chr1	134998128	134998328	+
Merged-chr1-135022620-1	chr1	135022520	135022720	+
Merged-chr1-135027343-1	chr1	135027243	135027443	+
Merged-chr1-135043365-1	chr1	135043265	135043465	+
Merged-chr18-35699900-1	chr18	35699800	35700000	+
Merged-chr18-35702298-1	chr18	35702198	35702398	+
Merged-chr18-35715936-1	chr18	35715836	35716036	+
Merged-chr18-35763097-1	chr18	35762997	35763197	+
Merged-chr18-35798912-1	chr18	35798812	35799012	+
Merged-chr9-76160167-1	chr9	76160067	76160267	+
Merged-chr9-76161848-1	chr9	76161748	76161948	+
Merged-chr18-35917468-1	chr18	35917368	35917568	+
Merged-chr9-76249936-1	chr9	76249836	76250036	+
Merged-chr18-35930809-1	chr18	35930709	35930909	+
Merged-chr9-76662617-1	chr9	76662517	76662717	+
Merged-chr18-35974904-1	chr18	35974804	35975004	+
Merged-chr9-77180458-1	chr9	77180358	77180558	+
Merged-chr18-35982595-1	chr18	35982495	35982695	+
Merged-chr9-77264115-1	chr9	77264015	77264215	+
Merged-chr9-77503917-1	chr9	77503817	77504017	+
Merged-chr10-98881330-1	chr10	98881230	98881430	+
Merged-chr10-98923838-1	chr10	98923738	98923938	+
Merged-chr10-99317121-1	chr10	99317021	99317221	+
Merged-chr10-99349433-1	chr10	99349333	99349533	+
Merged-chr10-99627427-1	chr10	99627327	99627527	+
Merged-chr10-99653412-1	chr10	99653312	99653512	+
Merged-chr10-100042058-1	chr10	100041958	100042158	+
Merged-chr10-100110860-1	chr10	100110760	100110960	+
Merged-chr2-74450266-1	chr2	74450166	74450366	+
Merged-chr2-74502898-1	chr2	74502798	74502998	+
Merged-chr2-74510784-1	chr2	74510684	74510884	+
Merged-chr2-74569251-1	chr2	74569151	74569351	+
Merged-chr2-74616082-1	chr2	74615982	74616182	+
Merged-chr1-135152239-1	chr1	135152139	135152339	+
Merged-chr1-135237180-1	chr1	135237080	135237280	+
Merged-chr2-74893448-1	chr2	74893348	74893548	+
Merged-chr2-74956896-1	chr2	74956796	74956996	+
Merged-chr1-135329447-1	chr1	135329347	135329547	+
Merged-chr2-75084505-1	chr2	75084405	75084605	+
Merged-chr1-135381131-1	chr1	135381031	135381231	+
Merged-chr1-135389575-1	chr1	135389475	135389675	+
Merged-chr1-135506926-1	chr1	135506826	135507026	+
Merged-chr1-135557738-1	chr1	135557638	135557838	+
Merged-chr1-135560460-1	chr1	135560360	135560560	+
Merged-chr18-36008346-1	chr18	36008246	36008446	+
Merged-chr18-36097220-1	chr18	36097120	36097320	+
Merged-chr18-36112829-1	chr18	36112729	36112929	+
Merged-chr18-36357257-1	chr18	36357157	36357357	+
Merged-chr18-36413410-1	chr18	36413310	36413510	+
Merged-chr18-36434819-1	chr18	36434719	36434919	+
Merged-chr9-77898329-1	chr9	77898229	77898429	+
Merged-chr18-36440247-1	chr18	36440147	36440347	+
Merged-chr9-77902303-1	chr9	77902203	77902403	+
Merged-chr18-36488419-1	chr18	36488319	36488519	+
Merged-chr9-77961066-1	chr9	77960966	77961166	+
Merged-chr18-36569648-1	chr18	36569548	36569748	+
Merged-chr9-78022012-1	chr9	78021912	78022112	+
Merged-chr18-36575392-1	chr18	36575292	36575492	+
Merged-chr9-78024601-1	chr9	78024501	78024701	+
Merged-chr9-78039693-1	chr9	78039593	78039793	+
Merged-chr9-78041969-1	chr9	78041869	78042069	+
Merged-chr10-101657289-1	chr10	101657189	101657389	+
Merged-chr10-101779926-1	chr10	101779826	101780026	+
Merged-chr10-101834898-1	chr10	101834798	101834998	+
Merged-chr10-101894549-1	chr10	101894449	101894649	+
Merged-chr10-102657329-1	chr10	102657229	102657429	+
Merged-chr10-102673720-1	chr10	102673620	102673820	+
Merged-chr10-102698954-1	chr10	102698854	102699054	+
Merged-chr10-102786282-1	chr10	102786182	102786382	+
Merged-chr2-75471000-1	chr2	75470900	75471100	+
Merged-chr2-75472692-1	chr2	75472592	75472792	+
Merged-chr2-75496772-1	chr2	75496672	75496872	+
Merged-chr2-75509440-1	chr2	75509340	75509540	+
Merged-chr2-75520316-1	chr2	75520216	75520416	+
Merged-chr2-75606476-1	chr2	75606376	75606576	+
Merged-chr1-135566175-1	chr1	135566075	135566275	+
Merged-chr2-75624454-1	chr2	75624354	75624554	+
Merged-chr2-75640244-1	chr2	75640144	75640344	+
Merged-chr1-135637893-1	chr1	135637793	135637993	+
Merged-chr2-75699426-1	chr2	75699326	75699526	+
Merged-chr1-135675079-1	chr1	135674979	135675179	+
Merged-chr2-75708097-1	chr2	75707997	75708197	+
Merged-chr1-136085659-1	chr1	136085559	136085759	+
Merged-chr1-136166700-1	chr1	136166600	136166800	+
Merged-chr1-136278758-1	chr1	136278658	136278858	+
Merged-chr1-136281393-1	chr1	136281293	136281493	+
Merged-chr18-36609792-1	chr18	36609692	36609892	+
Merged-chr18-36640047-1	chr18	36639947	36640147	+
Merged-chr18-36681813-1	chr18	36681713	36681913	+
Merged-chr18-36685219-1	chr18	36685119	36685319	+
Merged-chr18-36828576-1	chr18	36828476	36828676	+
Merged-chr18-36943370-1	chr18	36943270	36943470	+
Merged-chr18-36961408-1	chr18	36961308	36961508	+
Merged-chr18-36985109-1	chr18	36985009	36985209	+
Merged-chr18-37031887-1	chr18	37031787	37031987	+
Merged-chr10-102935799-1	chr10	102935699	102935899	+
Merged-chr10-103036213-1	chr10	103036113	103036313	+
Merged-chr10-103123396-1	chr10	103123296	103123496	+
Merged-chr10-103215278-1	chr10	103215178	103215378	+
Merged-chr10-103932299-1	chr10	103932199	103932399	+
Merged-chr10-103993051-1	chr10	103992951	103993151	+
Merged-chr10-104013238-1	chr10	104013138	104013338	+
Merged-chr10-104014454-1	chr10	104014354	104014554	+
Merged-chr2-75823382-1	chr2	75823282	75823482	+
Merged-chr2-75839092-1	chr2	75838992	75839192	+
Merged-chr2-76016093-1	chr2	76015993	76016193	+
Merged-chr2-76093100-1	chr2	76093000	76093200	+
Merged-chr1-136296631-1	chr1	136296531	136296731	+
Merged-chr1-136301113-1	chr1	136301013	136301213	+
Merged-chr2-76280230-1	chr2	76280130	76280330	+
Merged-chr2-76514116-1	chr2	76514016	76514216	+
Merged-chr2-76514778-1	chr2	76514678	76514878	+
Merged-chr1-136404876-1	chr1	136404776	136404976	+
Merged-chr2-76643582-1	chr2	76643482	76643682	+
Merged-chr1-136430923-1	chr1	136430823	136431023	+
Merged-chr1-136467452-1	chr1	136467352	136467552	+
Merged-chr18-37142202-1	chr18	37142102	37142302	+
Merged-chr18-37147098-1	chr18	37146998	37147198	+
Merged-chr18-37147880-1	chr18	37147780	37147980	+
Merged-chr18-37203794-1	chr18	37203694	37203894	+
Merged-chr18-37377848-1	chr18	37377748	37377948	+
Merged-chr18-37460511-1	chr18	37460411	37460611	+
Merged-chr18-37466996-1	chr18	37466896	37467096	+
Merged-chr18-37527149-1	chr18	37527049	37527249	+
Merged-chr18-37530707-1	chr18	37530607	37530807	+
Merged-chr10-104088374-1	chr10	104088274	104088474	+
Merged-chr10-104187056-1	chr10	104186956	104187156	+
Merged-chr10-104614515-1	chr10	104614415	104614615	+
Merged-chr10-104618658-1	chr10	104618558	104618758	+
Merged-chr10-104694762-1	chr10	104694662	104694862	+
Merged-chr10-104907181-1	chr10	104907081	104907281	+
Merged-chr10-105012418-1	chr10	105012318	105012518	+
Merged-chr10-105443338-1	chr10	105443238	105443438	+
Merged-chr1-136852632-1	chr1	136852532	136852732	+
Merged-chr1-137082767-1	chr1	137082667	137082867	+
Merged-chr1-137097323-1	chr1	137097223	137097423	+
Merged-chr1-137114522-1	chr1	137114422	137114622	+
Merged-chr1-137136659-1	chr1	137136559	137136759	+
Merged-chr1-137155855-1	chr1	137155755	137155955	+
Merged-chr1-137404599-1	chr1	137404499	137404699	+
Merged-chr10-105751035-1	chr10	105750935	105751135	+
Merged-chr10-105972312-1	chr10	105972212	105972412	+
Merged-chr10-106966025-1	chr10	106965925	106966125	+
Merged-chr10-107241613-1	chr10	107241513	107241713	+
Merged-chr10-107275799-1	chr10	107275699	107275899	+
Merged-chr10-107288186-1	chr10	107288086	107288286	+
Merged-chr10-107437084-1	chr10	107436984	107437184	+
Merged-chr1-137534429-1	chr1	137534329	137534529	+
Merged-chr1-137572219-1	chr1	137572119	137572319	+
Merged-chr1-137621011-1	chr1	137620911	137621111	+
Merged-chr1-138131344-1	chr1	138131244	138131444	+
Merged-chr1-138464322-1	chr1	138464222	138464422	+
Merged-chr1-138465949-1	chr1	138465849	138466049	+
Merged-chr1-138467218-1	chr1	138467118	138467318	+
Merged-chr10-107676125-1	chr10	107676025	107676225	+
Merged-chr10-107744671-1	chr10	107744571	107744771	+
Merged-chr10-107792000-1	chr10	107791900	107792100	+
Merged-chr10-107844237-1	chr10	107844137	107844337	+
Merged-chr10-107876672-1	chr10	107876572	107876772	+
Merged-chr1-138469663-1	chr1	138469563	138469763	+
Merged-chr1-138527471-1	chr1	138527371	138527571	+
Merged-chr1-138591835-1	chr1	138591735	138591935	+
Merged-chr1-138592856-1	chr1	138592756	138592956	+
Merged-chr1-138636452-1	chr1	138636352	138636552	+
Merged-chr1-138670528-1	chr1	138670428	138670628	+
Merged-chr10-109102070-1	chr10	109101970	109102170	+
Merged-chr10-109462121-1	chr10	109462021	109462221	+
Merged-chr10-109666564-1	chr10	109666464	109666664	+
Merged-chr10-110133810-1	chr10	110133710	110133910	+
Merged-chr10-110232267-1	chr10	110232167	110232367	+
Merged-chr1-138814917-1	chr1	138814817	138815017	+
Merged-chr1-138848018-1	chr1	138847918	138848118	+
Merged-chr1-138850921-1	chr1	138850821	138851021	+
Merged-chr1-139287023-1	chr1	139286923	139287123	+
Merged-chr10-110340921-1	chr10	110340821	110341021	+
Merged-chr10-110368599-1	chr10	110368499	110368699	+
Merged-chr10-110414617-1	chr10	110414517	110414717	+
Merged-chr10-110437876-1	chr10	110437776	110437976	+
Merged-chr10-110537185-1	chr10	110537085	110537285	+
Merged-chr10-110581668-1	chr10	110581568	110581768	+
Merged-chr10-110771084-1	chr10	110770984	110771184	+
Merged-chr1-139553890-1	chr1	139553790	139553990	+
Merged-chr1-139634939-1	chr1	139634839	139635039	+
Merged-chr1-139843465-1	chr1	139843365	139843565	+
Merged-chr1-140163829-1	chr1	140163729	140163929	+
Merged-chr1-140204853-1	chr1	140204753	140204953	+
Merged-chr1-140207159-1	chr1	140207059	140207259	+
Merged-chr1-140516849-1	chr1	140516749	140516949	+
Merged-chr1-140687318-1	chr1	140687218	140687418	+
Merged-chr1-141273641-1	chr1	141273541	141273741	+
Merged-chr6-98958777-1	chr6	98958677	98958877	+
Merged-chr6-98972258-1	chr6	98972158	98972358	+
Merged-chr6-98979789-1	chr6	98979689	98979889	+
Merged-chr6-99021675-1	chr6	99021575	99021775	+
Merged-chr6-99805184-1	chr6	99805084	99805284	+
Merged-chr6-100131125-1	chr6	100131025	100131225	+
Merged-chr6-100170104-1	chr6	100170004	100170204	+
Merged-chr6-100326847-1	chr6	100326747	100326947	+
Merged-chr6-100330038-1	chr6	100329938	100330138	+
Merged-chr6-100340510-1	chr6	100340410	100340610	+
Merged-chr7-107847103-1	chr7	107847003	107847203	+
Merged-chr7-107848680-1	chr7	107848580	107848780	+
Merged-chr7-107991514-1	chr7	107991414	107991614	+
Merged-chr7-108091938-1	chr7	108091838	108092038	+
Merged-chr7-108308982-1	chr7	108308882	108309082	+
Merged-chr6-100372271-1	chr6	100372171	100372371	+
Merged-chr6-100375082-1	chr6	100374982	100375182	+
Merged-chr7-108586374-1	chr7	108586274	108586474	+
Merged-chr6-100386803-1	chr6	100386703	100386903	+
Merged-chr7-108771958-1	chr7	108771858	108772058	+
Merged-chr7-108799368-1	chr7	108799268	108799468	+
Merged-chr7-108810662-1	chr7	108810562	108810762	+
Merged-chr6-100959837-1	chr6	100959737	100959937	+
Merged-chr6-100960575-1	chr6	100960475	100960675	+
Merged-chr6-101685226-1	chr6	101685126	101685326	+
Merged-chr6-101789235-1	chr6	101789135	101789335	+
Merged-chr6-101928791-1	chr6	101928691	101928891	+
Merged-chr7-108982057-1	chr7	108981957	108982157	+
Merged-chr7-109171075-1	chr7	109170975	109171175	+
Merged-chr7-109225326-1	chr7	109225226	109225426	+
Merged-chr7-109248792-1	chr7	109248692	109248892	+
Merged-chr7-109281224-1	chr7	109281124	109281324	+
Merged-chr7-109316649-1	chr7	109316549	109316749	+
Merged-chr6-101986269-1	chr6	101986169	101986369	+
Merged-chr7-109348342-1	chr7	109348242	109348442	+
Merged-chr7-109349319-1	chr7	109349219	109349419	+
Merged-chr6-102372067-1	chr6	102371967	102372167	+
Merged-chr6-102529306-1	chr6	102529206	102529406	+
Merged-chr7-109590221-1	chr7	109590121	109590321	+
Merged-chr6-102547928-1	chr6	102547828	102548028	+
Merged-chr6-102618972-1	chr6	102618872	102619072	+
Merged-chr6-102683896-1	chr6	102683796	102683996	+
Merged-chr6-102735873-1	chr6	102735773	102735973	+
Merged-chr7-109689895-1	chr7	109689795	109689995	+
Merged-chr7-109944937-1	chr7	109944837	109945037	+
Merged-chr7-110148503-1	chr7	110148403	110148603	+
Merged-chr7-110546498-1	chr7	110546398	110546598	+
Merged-chr6-102753226-1	chr6	102753126	102753326	+
Merged-chr7-110564272-1	chr7	110564172	110564372	+
Merged-chr6-103016905-1	chr6	103016805	103017005	+
Merged-chr7-110764554-1	chr7	110764454	110764654	+
Merged-chr6-103017556-1	chr6	103017456	103017656	+
Merged-chr7-111348422-1	chr7	111348322	111348522	+
Merged-chr6-103165974-1	chr6	103165874	103166074	+
Merged-chr7-111367899-1	chr7	111367799	111367999	+
Merged-chr6-103671490-1	chr6	103671390	103671590	+
Merged-chr7-111392778-1	chr7	111392678	111392878	+
Merged-chr6-103909661-1	chr6	103909561	103909761	+
Merged-chr6-103983502-1	chr6	103983402	103983602	+
Merged-chr6-104934325-1	chr6	104934225	104934425	+
Merged-chr16-42022881-1	chr16	42022781	42022981	+
Merged-chr16-42776741-1	chr16	42776641	42776841	+
Merged-chr16-42782118-1	chr16	42782018	42782218	+
Merged-chr16-42814458-1	chr16	42814358	42814558	+
Merged-chr16-42861801-1	chr16	42861701	42861901	+
Merged-chr16-43546745-1	chr16	43546645	43546845	+
Merged-chr7-111860819-1	chr7	111860719	111860919	+
Merged-chr7-111872208-1	chr7	111872108	111872308	+
Merged-chr7-112373649-1	chr7	112373549	112373749	+
Merged-chr7-112410999-1	chr7	112410899	112411099	+
Merged-chr7-112500431-1	chr7	112500331	112500531	+
Merged-chr6-104981148-1	chr6	104981048	104981248	+
Merged-chr7-112551270-1	chr7	112551170	112551370	+
Merged-chr6-105026641-1	chr6	105026541	105026741	+
Merged-chr7-113092237-1	chr7	113092137	113092337	+
Merged-chr6-105185004-1	chr6	105184904	105185104	+
Merged-chr7-113093323-1	chr7	113093223	113093423	+
Merged-chr6-105442268-1	chr6	105442168	105442368	+
Merged-chr7-113348611-1	chr7	113348511	113348711	+
Merged-chr6-105499512-1	chr6	105499412	105499612	+
Merged-chr7-113349659-1	chr7	113349559	113349759	+
Merged-chr6-105618162-1	chr6	105618062	105618262	+
Merged-chr6-105872467-1	chr6	105872367	105872567	+
Merged-chr16-44002304-1	chr16	44002204	44002404	+
Merged-chr16-44045656-1	chr16	44045556	44045756	+
Merged-chr16-44063641-1	chr16	44063541	44063741	+
Merged-chr16-44292964-1	chr16	44292864	44293064	+
Merged-chr16-44568318-1	chr16	44568218	44568418	+
Merged-chr16-44671527-1	chr16	44671427	44671627	+
Merged-chr7-113788895-1	chr7	113788795	113788995	+
Merged-chr7-113801416-1	chr7	113801316	113801516	+
Merged-chr7-113889307-1	chr7	113889207	113889407	+
Merged-chr6-106704365-1	chr6	106704265	106704465	+
Merged-chr6-106770793-1	chr6	106770693	106770893	+
Merged-chr7-114409744-1	chr7	114409644	114409844	+
Merged-chr7-114414304-1	chr7	114414204	114414404	+
Merged-chr6-107000998-1	chr6	107000898	107001098	+
Merged-chr6-107002341-1	chr6	107002241	107002441	+
Merged-chr6-107412640-1	chr6	107412540	107412740	+
Merged-chr6-107538113-1	chr6	107538013	107538213	+
Merged-chr6-107985019-1	chr6	107984919	107985119	+
Merged-chr16-44717059-1	chr16	44716959	44717159	+
Merged-chr16-45142048-1	chr16	45141948	45142148	+
Merged-chr16-47457764-1	chr16	47457664	47457864	+
Merged-chr7-114492838-1	chr7	114492738	114492938	+
Merged-chr7-114760519-1	chr7	114760419	114760619	+
Merged-chr7-114805093-1	chr7	114804993	114805193	+
Merged-chr7-114823873-1	chr7	114823773	114823973	+
Merged-chr7-114869214-1	chr7	114869114	114869314	+
Merged-chr6-108033961-1	chr6	108033861	108034061	+
Merged-chr6-108203439-1	chr6	108203339	108203539	+
Merged-chr7-115340296-1	chr7	115340196	115340396	+
Merged-chr6-108209902-1	chr6	108209802	108210002	+
Merged-chr6-108284208-1	chr6	108284108	108284308	+
Merged-chr6-108367667-1	chr6	108367567	108367767	+
Merged-chr6-108391478-1	chr6	108391378	108391578	+
Merged-chr6-108407665-1	chr6	108407565	108407765	+
Merged-chr16-48026447-1	chr16	48026347	48026547	+
Merged-chr16-48144005-1	chr16	48143905	48144105	+
Merged-chr16-48154585-1	chr16	48154485	48154685	+
Merged-chr16-48283837-1	chr16	48283737	48283937	+
Merged-chr16-48309120-1	chr16	48309020	48309220	+
Merged-chr16-48321025-1	chr16	48320925	48321125	+
Merged-chr16-48422772-1	chr16	48422672	48422872	+
Merged-chr16-48425887-1	chr16	48425787	48425987	+
Merged-chr7-115514625-1	chr7	115514525	115514725	+
Merged-chr7-115519661-1	chr7	115519561	115519761	+
Merged-chr6-108508047-1	chr6	108507947	108508147	+
Merged-chr6-108536007-1	chr6	108535907	108536107	+
Merged-chr7-115817787-1	chr7	115817687	115817887	+
Merged-chr6-108573229-1	chr6	108573129	108573329	+
Merged-chr7-115973559-1	chr7	115973459	115973659	+
Merged-chr6-108594480-1	chr6	108594380	108594580	+
Merged-chr6-108635818-1	chr6	108635718	108635918	+
Merged-chr6-108686443-1	chr6	108686343	108686543	+
Merged-chr6-108819236-1	chr6	108819136	108819336	+
Merged-chr16-48435844-1	chr16	48435744	48435944	+
Merged-chr16-48487577-1	chr16	48487477	48487677	+
Merged-chr16-48608771-1	chr16	48608671	48608871	+
Merged-chr16-48614205-1	chr16	48614105	48614305	+
Merged-chr16-48657282-1	chr16	48657182	48657382	+
Merged-chr16-48857834-1	chr16	48857734	48857934	+
Merged-chr16-48888388-1	chr16	48888288	48888488	+
Merged-chr16-48964496-1	chr16	48964396	48964596	+
Merged-chr16-49031226-1	chr16	49031126	49031326	+
Merged-chr7-116226222-1	chr7	116226122	116226322	+
Merged-chr7-116514564-1	chr7	116514464	116514664	+
Merged-chr7-116667507-1	chr7	116667407	116667607	+
Merged-chr6-109081410-1	chr6	109081310	109081510	+
Merged-chr7-116847893-1	chr7	116847793	116847993	+
Merged-chr6-109196699-1	chr6	109196599	109196799	+
Merged-chr7-116909458-1	chr7	116909358	116909558	+
Merged-chr6-109510366-1	chr6	109510266	109510466	+
Merged-chr7-116933343-1	chr7	116933243	116933443	+
Merged-chr6-109593393-1	chr6	109593293	109593493	+
Merged-chr7-117018849-1	chr7	117018749	117018949	+
Merged-chr6-109662520-1	chr6	109662420	109662620	+
Merged-chr6-110149947-1	chr6	110149847	110150047	+
Merged-chr6-111370481-1	chr6	111370381	111370581	+
Merged-chr6-111396466-1	chr6	111396366	111396566	+
Merged-chr6-111436177-1	chr6	111436077	111436277	+
Merged-chr16-49486116-1	chr16	49486016	49486216	+
Merged-chr16-49488201-1	chr16	49488101	49488301	+
Merged-chr16-49804186-1	chr16	49804086	49804286	+
Merged-chr16-50185368-1	chr16	50185268	50185468	+
Merged-chr16-50528184-1	chr16	50528084	50528284	+
Merged-chr16-50544820-1	chr16	50544720	50544920	+
Merged-chr7-117130221-1	chr7	117130121	117130321	+
Merged-chr7-117204348-1	chr7	117204248	117204448	+
Merged-chr7-117264136-1	chr7	117264036	117264236	+
Merged-chr7-117269884-1	chr7	117269784	117269984	+
Merged-chr7-117308393-1	chr7	117308293	117308493	+
Merged-chr7-117309736-1	chr7	117309636	117309836	+
Merged-chr7-117890245-1	chr7	117890145	117890345	+
Merged-chr16-50700458-1	chr16	50700358	50700558	+
Merged-chr16-50757017-1	chr16	50756917	50757117	+
Merged-chr16-51088880-1	chr16	51088780	51088980	+
Merged-chr16-51256066-1	chr16	51255966	51256166	+
Merged-chr16-51368204-1	chr16	51368104	51368304	+
Merged-chr16-51731463-1	chr16	51731363	51731563	+
Merged-chr7-118397778-1	chr7	118397678	118397878	+
Merged-chr7-118445920-1	chr7	118445820	118446020	+
Merged-chr7-118689251-1	chr7	118689151	118689351	+
Merged-chr7-119838486-1	chr7	119838386	119838586	+
Merged-chr7-119862627-1	chr7	119862527	119862727	+
Merged-chr7-119969041-1	chr7	119968941	119969141	+
Merged-chr16-51754485-1	chr16	51754385	51754585	+
[truncated: 16,147 more rows]

## Sheet: Overlap
#name	chr	start	end	strand
Merged-chr14-16811015-2	chr14	16810907	16811123	+
Merged-chr14-17803881-2	chr14	17803768	17803995	+
Merged-chr14-18430485-2	chr14	18430358	18430613	+
Merged-chr14-19015716-2	chr14	19015603	19015830	+
Merged-chr10-82272189-2	chr10	82271990	82272389	+
Merged-chr10-82863962-2	chr10	82863855	82864070	+
Merged-chr10-82935255-2	chr10	82935148	82935363	+
Merged-chr10-84017429-2	chr10	84017268	84017591	+
Merged-chr10-84084985-2	chr10	84084823	84085148	+
Merged-chr10-84208069-2	chr10	84207968	84208170	+
Merged-chr10-84299101-2	chr10	84298997	84299206	+
Merged-chr10-84376143-2	chr10	84376001	84376285	+
Merged-chr14-19160052-2	chr14	19159913	19160191	+
Merged-chr14-19261759-2	chr14	19261605	19261913	+
Merged-chr14-19389848-2	chr14	19389719	19389978	+
Merged-chr14-19729445-2	chr14	19729342	19729548	+
Merged-chr14-20569225-2	chr14	20569076	20569375	+
Merged-chr14-20672908-2	chr14	20672793	20673023	+
Merged-chr10-84510930-2	chr10	84510821	84511039	+
Merged-chr10-84914608-2	chr10	84914484	84914732	+
Merged-chr10-84930353-2	chr10	84930229	84930478	+
Merged-chr10-85002625-2	chr10	85002513	85002738	+
Merged-chr10-86232741-2	chr10	86232612	86232871	+
Merged-chr10-86605672-2	chr10	86605553	86605791	+
Merged-chr10-88089085-2	chr10	88088976	88089195	+
Merged-chr14-21036766-2	chr14	21036662	21036870	+
Merged-chr14-21099960-2	chr14	21099770	21100151	+
Merged-chr14-22293994-2	chr14	22293842	22294147	+
Merged-chr14-22355935-2	chr14	22355823	22356047	+
Merged-chr14-22824412-2	chr14	22824297	22824528	+
Merged-chr14-22878167-2	chr14	22878038	22878296	+
Merged-chr10-88147888-2	chr10	88147781	88147996	+
Merged-chr10-88793145-2	chr10	88792983	88793308	+
Merged-chr10-88933693-2	chr10	88933574	88933812	+
Merged-chr10-89023389-2	chr10	89023257	89023521	+
Merged-chr10-89791999-2	chr10	89791831	89792167	+
Merged-chr10-90172495-2	chr10	90172394	90172596	+
Merged-chr10-90808392-2	chr10	90808272	90808513	+
Merged-chr14-24216197-2	chr14	24216084	24216310	+
Merged-chr14-24354917-2	chr14	24354765	24355069	+
Merged-chr14-24968250-2	chr14	24968099	24968401	+
Merged-chr14-26137719-2	chr14	26137609	26137829	+
Merged-chr14-26182351-2	chr14	26182217	26182486	+
Merged-chr14-26268218-2	chr14	26268086	26268350	+
Merged-chr10-91626094-2	chr10	91625965	91626224	+
Merged-chr10-91982292-2	chr10	91982157	91982428	+
Merged-chr10-92216411-2	chr10	92216249	92216574	+
Merged-chr10-92786700-2	chr10	92786574	92786826	+
Merged-chr10-92827366-2	chr10	92827256	92827477	+
Merged-chr10-92915692-2	chr10	92915589	92915795	+
Merged-chr10-92934317-2	chr10	92934158	92934477	+
Merged-chr10-92953432-2	chr10	92953301	92953563	+
Merged-chr14-26277275-2	chr14	26277175	26277376	+
Merged-chr14-26410693-2	chr14	26410582	26410805	+
Merged-chr14-26424474-2	chr14	26424354	26424595	+
Merged-chr14-26630687-2	chr14	26630569	26630806	+
Merged-chr14-27693367-2	chr14	27693255	27693480	+
Merged-chr14-27852639-2	chr14	27852502	27852776	+
Merged-chr14-27881359-2	chr14	27881228	27881491	+
Merged-chr10-93005244-2	chr10	93005142	93005346	+
Merged-chr10-93133750-2	chr10	93133615	93133886	+
Merged-chr10-93303712-2	chr10	93303601	93303824	+
Merged-chr10-93556502-2	chr10	93556402	93556602	+
Merged-chr10-93635607-2	chr10	93635505	93635709	+
Merged-chr10-93871673-2	chr10	93871533	93871814	+
Merged-chr10-94417042-2	chr10	94416940	94417144	+
Merged-chr10-94683358-2	chr10	94683234	94683482	+
Merged-chr14-27907625-2	chr14	27907488	27907763	+
Merged-chr14-28160640-2	chr14	28160496	28160784	+
Merged-chr14-28409699-2	chr14	28409567	28409831	+
Merged-chr14-31292761-2	chr14	31292610	31292912	+
Merged-chr14-31952010-2	chr14	31951886	31952134	+
Merged-chr14-32485135-2	chr14	32485014	32485257	+
Merged-chr10-94816941-2	chr10	94816833	94817050	+
Merged-chr10-94902493-2	chr10	94902392	94902594	+
Merged-chr10-94918894-2	chr10	94918721	94919067	+
Merged-chr10-94924018-2	chr10	94923905	94924132	+
Merged-chr10-95060909-2	chr10	95060764	95061054	+
Merged-chr10-95354256-2	chr10	95354152	95354361	+
Merged-chr10-95570155-2	chr10	95570023	95570288	+
Merged-chr10-95612583-2	chr10	95612446	95612721	+
Merged-chr10-96180077-2	chr10	96179970	96180184	+
Merged-chr14-32679746-2	chr14	32679598	32679894	+
Merged-chr14-32731770-2	chr14	32731667	32731873	+
Merged-chr14-33944443-2	chr14	33944342	33944544	+
Merged-chr14-35071927-2	chr14	35071817	35072037	+
Merged-chr14-35126066-2	chr14	35125927	35126205	+
Merged-chr14-35177996-2	chr14	35177862	35178130	+
Merged-chr10-96184123-2	chr10	96183959	96184288	+
Merged-chr10-97025833-2	chr10	97025721	97025945	+
Merged-chr10-98724097-2	chr10	98723955	98724239	+
Merged-chr10-98816434-2	chr10	98816244	98816625	+
Merged-chr10-98931816-2	chr10	98931715	98931918	+
Merged-chr10-99399898-2	chr10	99399793	99400004	+
Merged-chr14-35474169-2	chr14	35474068	35474270	+
Merged-chr14-35507306-2	chr14	35507188	35507424	+
Merged-chr14-35732598-2	chr14	35732491	35732706	+
Merged-chr14-36544103-2	chr14	36543936	36544270	+
Merged-chr14-37593606-2	chr14	37593487	37593726	+
Merged-chr14-37728087-2	chr14	37727962	37728213	+
Merged-chr14-38556371-2	chr14	38556246	38556497	+
Merged-chr10-100629926-2	chr10	100629751	100630102	+
Merged-chr10-101833355-2	chr10	101833221	101833489	+
Merged-chr10-102831798-2	chr10	102831654	102831943	+
Merged-chr10-103537127-2	chr10	103536935	103537319	+
Merged-chr10-104261212-2	chr10	104261026	104261398	+
Merged-chr10-105114457-2	chr10	105114334	105114581	+
Merged-chr14-38559205-2	chr14	38559080	38559330	+
Merged-chr14-39136170-2	chr14	39136053	39136287	+
Merged-chr14-40452308-2	chr14	40452135	40452481	+
Merged-chr14-40871776-2	chr14	40871658	40871894	+
Merged-chr14-41268533-2	chr14	41268416	41268650	+
Merged-chr14-41705371-2	chr14	41705190	41705552	+
Merged-chr14-42277547-2	chr14	42277390	42277704	+
Merged-chr10-105619982-2	chr10	105619873	105620091	+
Merged-chr10-105625086-2	chr10	105624930	105625242	+
Merged-chr10-106926144-2	chr10	106926019	106926270	+
Merged-chr10-107688004-2	chr10	107687883	107688125	+
Merged-chr10-107724138-2	chr10	107723986	107724291	+
Merged-chr10-107840604-2	chr10	107840491	107840718	+
Merged-chr10-108005513-2	chr10	108005400	108005626	+
Merged-chr10-108007126-2	chr10	108007003	108007249	+
Merged-chr10-108009990-2	chr10	108009851	108010129	+
Merged-chr14-42518244-2	chr14	42518114	42518374	+
Merged-chr14-43524680-2	chr14	43524533	43524827	+
Merged-chr14-43884258-2	chr14	43884104	43884412	+
Merged-chr14-43950127-2	chr14	43949990	43950264	+
Merged-chr14-43990921-2	chr14	43990773	43991069	+
Merged-chr10-108876869-2	chr10	108876761	108876978	+
Merged-chr10-108959037-2	chr10	108958930	108959145	+
Merged-chr10-108998424-2	chr10	108998314	108998534	+
Merged-chr10-110291960-2	chr10	110291842	110292079	+
Merged-chr10-110293104-2	chr10	110292996	110293212	+
Merged-chr10-110348658-2	chr10	110348535	110348781	+
Merged-chr10-110554352-2	chr10	110554242	110554462	+
Merged-chr10-111011451-2	chr10	111011310	111011593	+
Merged-chrX-121057352-2	chrX	121057219	121057485	+
Merged-chrX-121159280-2	chrX	121159150	121159411	+
Merged-chrX-121596471-2	chrX	121596334	121596609	+
Merged-chrX-121725895-2	chrX	121725792	121725999	+
Merged-chrX-121868684-2	chrX	121868543	121868825	+
Merged-chrX-121987449-2	chrX	121987343	121987556	+
Merged-chrX-121993109-2	chrX	121992990	121993228	+
Merged-chrX-122160868-2	chrX	122160740	122160997	+
Merged-chrX-123194736-2	chrX	123194625	123194847	+
Merged-chrX-123628694-2	chrX	123628535	123628854	+
Merged-chrX-124059243-2	chrX	124059107	124059380	+
Merged-chrX-125111194-2	chrX	125111070	125111318	+
Merged-chrX-125681394-2	chrX	125681249	125681540	+
Merged-chrX-127879881-2	chrX	127879763	127880000	+
Merged-chrX-129757554-2	chrX	129757437	129757672	+
Merged-chrX-130208523-2	chrX	130208417	130208630	+
Merged-chrX-131154447-2	chrX	131154305	131154589	+
Merged-chrX-135951522-2	chrX	135951392	135951652	+
Merged-chrX-135976714-2	chrX	135976613	135976816	+
Merged-chrX-136292171-2	chrX	136292053	136292289	+
Merged-chrX-136990999-2	chrX	136990887	136991111	+
Merged-chrX-136992936-2	chrX	136992821	136993052	+
Merged-chrX-139977807-2	chrX	139977673	139977942	+
Merged-chrX-140772661-2	chrX	140772520	140772803	+
Merged-chrX-146139056-2	chrX	146138939	146139173	+
Merged-chrX-146562442-2	chrX	146562313	146562571	+
Merged-chrX-146637496-2	chrX	146637348	146637645	+
Merged-chrX-146912513-2	chrX	146912396	146912630	+
Merged-chrX-147558622-2	chrX	147558495	147558749	+
Merged-chrX-149087493-2	chrX	149087384	149087602	+
Merged-chrX-149716923-2	chrX	149716814	149717032	+
Merged-chrX-150761272-2	chrX	150761149	150761395	+
Merged-chrX-152366140-2	chrX	152365994	152366287	+
Merged-chrX-154599552-2	chrX	154599425	154599680	+
Merged-chrX-155540883-2	chrX	155540747	155541019	+
Merged-chrX-156007099-2	chrX	156006975	156007224	+
Merged-chrX-157544826-2	chrX	157544723	157544929	+
Merged-chrX-159194192-2	chrX	159194055	159194329	+
Merged-chrX-159270249-2	chrX	159270131	159270367	+
Merged-chrX-159641612-2	chrX	159641501	159641723	+
Merged-chrX-160491706-2	chrX	160491549	160491863	+
Merged-chrX-161147571-2	chrX	161147394	161147748	+
Merged-chrX-161441240-2	chrX	161441124	161441357	+
Merged-chrX-164579198-2	chrX	164579077	164579319	+
Merged-chrX-166527269-2	chrX	166527160	166527378	+
Merged-chrY-2086159-2	chrY	2085999	2086319	+
Merged-chrY-2136050-2	chrY	2135935	2136165	+
Merged-chrY_random-589617-2	chrY_random	589507	589727	+
Merged-chrY_random-2331656-2	chrY_random	2331546	2331766	+
Merged-chrY_random-2332865-2	chrY_random	2332736	2332994	+
Merged-chrY_random-2337970-2	chrY_random	2337870	2338071	+
Merged-chrY_random-3899918-2	chrY_random	3899818	3900019	+
Merged-chrY_random-8722043-2	chrY_random	8721938	8722149	+
Merged-chrY_random-11924746-2	chrY_random	11924627	11924866	+
Merged-chrY_random-34300755-2	chrY_random	34300630	34300881	+
Merged-chrY_random-34301888-2	chrY_random	34301701	34302076	+
Merged-chrY_random-41814951-2	chrY_random	41814846	41815056	+
Merged-chr5-113464211-2	chr5	113464096	113464326	+
Merged-chr5-113762153-2	chr5	113762047	113762260	+
Merged-chr5-113802802-2	chr5	113802693	113802912	+
Merged-chr5-113851151-2	chr5	113851025	113851277	+
Merged-chr5-114042037-2	chr5	114041856	114042218	+
Merged-chr5-114587774-2	chr5	114587625	114587923	+
Merged-chr5-114830838-2	chr5	114830726	114830950	+
Merged-chr5-115271966-2	chr5	115271828	115272104	+
Merged-chr5-115563544-2	chr5	115563437	115563652	+
Merged-chr2-155395046-2	chr2	155394940	155395152	+
Merged-chr2-156467047-2	chr2	156466913	156467182	+
Merged-chr2-156514413-2	chr2	156514282	156514545	+
Merged-chr2-156667979-2	chr2	156667871	156668087	+
Merged-chr2-157012445-2	chr2	157012295	157012595	+
Merged-chr5-115824020-2	chr5	115823848	115824192	+
Merged-chr5-115926564-2	chr5	115926426	115926702	+
Merged-chr5-116291546-2	chr5	116291443	116291650	+
Merged-chr5-116860451-2	chr5	116860348	116860555	+
Merged-chr5-116868611-2	chr5	116868495	116868727	+
Merged-chr5-116888526-2	chr5	116888423	116888630	+
Merged-chr5-116907106-2	chr5	116906987	116907226	+
Merged-chr5-117041880-2	chr5	117041729	117042032	+
Merged-chr2-157061901-2	chr2	157061784	157062018	+
Merged-chr2-157074112-2	chr2	157073951	157074273	+
Merged-chr2-157392366-2	chr2	157392257	157392475	+
Merged-chr2-157495940-2	chr2	157495791	157496090	+
Merged-chr2-157666568-2	chr2	157666392	157666745	+
Merged-chr2-157802284-2	chr2	157802121	157802448	+
Merged-chr5-117232253-2	chr5	117232125	117232381	+
Merged-chr5-117757156-2	chr5	117756988	117757325	+
Merged-chr5-117846779-2	chr5	117846642	117846917	+
Merged-chr5-118885739-2	chr5	118885623	118885855	+
Merged-chr5-118895508-2	chr5	118895312	118895704	+
Merged-chr5-118961200-2	chr5	118961097	118961303	+
Merged-chr5-119093342-2	chr5	119093207	119093478	+
Merged-chr5-119137294-2	chr5	119137121	119137468	+
Merged-chr2-158003575-2	chr2	158003457	158003694	+
Merged-chr2-158838721-2	chr2	158838603	158838840	+
Merged-chr2-160186129-2	chr2	160185983	160186275	+
Merged-chr2-160463837-2	chr2	160463726	160463948	+
Merged-chr2-160482113-2	chr2	160481973	160482254	+
Merged-chr2-160486321-2	chr2	160486168	160486475	+
Merged-chr5-119141240-2	chr5	119141139	119141341	+
Merged-chr5-119265967-2	chr5	119265842	119266092	+
Merged-chr5-119505692-2	chr5	119505570	119505815	+
Merged-chr5-119754844-2	chr5	119754701	119754987	+
Merged-chr5-119848126-2	chr5	119848025	119848228	+
Merged-chr5-120130046-2	chr5	120129933	120130160	+
Merged-chr5-121284121-2	chr5	121284017	121284225	+
Merged-chr5-122034368-2	chr5	122034197	122034539	+
Merged-chr2-160713298-2	chr2	160713147	160713450	+
Merged-chr2-161013493-2	chr2	161013376	161013610	+
Merged-chr2-161022697-2	chr2	161022555	161022839	+
Merged-chr2-162484827-2	chr2	162484713	162484942	+
Merged-chr2-162888011-2	chr2	162887895	162888128	+
Merged-chr2-162893152-2	chr2	162892973	162893331	+
Merged-chr2-163131842-2	chr2	163131729	163131955	+
Merged-chr5-122599364-2	chr5	122599220	122599509	+
Merged-chr5-122641691-2	chr5	122641550	122641832	+
Merged-chr5-122903308-2	chr5	122903161	122903455	+
Merged-chr5-123077537-2	chr5	123077417	123077657	+
Merged-chr5-123163295-2	chr5	123163168	123163422	+
Merged-chr5-123350420-2	chr5	123350255	123350585	+
Merged-chr2-163287261-2	chr2	163287092	163287430	+
Merged-chr2-163288319-2	chr2	163288165	163288473	+
Merged-chr2-163289213-2	chr2	163289086	163289341	+
Merged-chr2-164254263-2	chr2	164254158	164254369	+
Merged-chr2-164286167-2	chr2	164286021	164286314	+
Merged-chr2-164347388-2	chr2	164347275	164347501	+
Merged-chr2-164783302-2	chr2	164783195	164783410	+
Merged-chr2-164805486-2	chr2	164805381	164805592	+
Merged-chr5-123608255-2	chr5	123608152	123608359	+
Merged-chr5-123748660-2	chr5	123748545	123748776	+
Merged-chr5-123825982-2	chr5	123825840	123826124	+
Merged-chr5-124390897-2	chr5	124390795	124390999	+
Merged-chr5-124627003-2	chr5	124626893	124627113	+
Merged-chr5-124806963-2	chr5	124806858	124807069	+
Merged-chr5-125029058-2	chr5	125028916	125029200	+
Merged-chr5-125403502-2	chr5	125403382	125403623	+
Merged-chr5-125646519-2	chr5	125646405	125646633	+
Merged-chr5-125868201-2	chr5	125868053	125868350	+
Merged-chr2-165318896-2	chr2	165318795	165318998	+
Merged-chr2-165635634-2	chr2	165635488	165635781	+
Merged-chr2-165723959-2	chr2	165723853	165724065	+
Merged-chr2-165738729-2	chr2	165738611	165738847	+
Merged-chr2-165768823-2	chr2	165768715	165768931	+
Merged-chr2-165982848-2	chr2	165982705	165982991	+
Merged-chr2-166063585-2	chr2	166063474	166063696	+
Merged-chr2-166312872-2	chr2	166312732	166313012	+
Merged-chr5-125906857-2	chr5	125906750	125906964	+
Merged-chr5-126818482-2	chr5	126818321	126818643	+
Merged-chr5-127110328-2	chr5	127110221	127110436	+
Merged-chr5-127235693-2	chr5	127235566	127235821	+
Merged-chr5-127249705-2	chr5	127249589	127249821	+
Merged-chr2-166555991-2	chr2	166555857	166556125	+
Merged-chr2-166642444-2	chr2	166642309	166642579	+
Merged-chr2-166884423-2	chr2	166884305	166884542	+
Merged-chr2-166897936-2	chr2	166897824	166898048	+
Merged-chr2-166951523-2	chr2	166951402	166951644	+
Merged-chr2-167024693-2	chr2	167024540	167024846	+
Merged-chr2-167108610-2	chr2	167108498	167108722	+
Merged-chr2-167234111-2	chr2	167234004	167234218	+
Merged-chr2-167355655-2	chr2	167355550	167355761	+
Merged-chr5-127441643-2	chr5	127441529	127441758	+
Merged-chr5-127841761-2	chr5	127841656	127841866	+
Merged-chr5-128119730-2	chr5	128119599	128119862	+
Merged-chr5-128989075-2	chr5	128988969	128989182	+
Merged-chr5-129106619-2	chr5	129106508	129106731	+
Merged-chr5-129748310-2	chr5	129748179	129748441	+
Merged-chr2-167607821-2	chr2	167607702	167607941	+
Merged-chr2-167932997-2	chr2	167932852	167933143	+
Merged-chr2-168021468-2	chr2	168021326	168021610	+
Merged-chr2-168032866-2	chr2	168032738	168032995	+
Merged-chr2-168039744-2	chr2	168039611	168039877	+
Merged-chr2-168560992-2	chr2	168560883	168561101	+
Merged-chr2-168780739-2	chr2	168780588	168780890	+
Merged-chr5-130138794-2	chr5	130138660	130138929	+
Merged-chr5-130176035-2	chr5	130175919	130176151	+
Merged-chr5-130247038-2	chr5	130246913	130247164	+
Merged-chr5-130839193-2	chr5	130839085	130839301	+
Merged-chr5-131571675-2	chr5	131571513	131571837	+
Merged-chr5-131653282-2	chr5	131653128	131653436	+
Merged-chr2-168785177-2	chr2	168785066	168785289	+
Merged-chr2-169554196-2	chr2	169554065	169554327	+
Merged-chr2-169685170-2	chr2	169685048	169685292	+
Merged-chr2-169713639-2	chr2	169713534	169713744	+
Merged-chr2-169991362-2	chr2	169991261	169991463	+
Merged-chr2-170071435-2	chr2	170071271	170071599	+
Merged-chr5-131968542-2	chr5	131968410	131968674	+
Merged-chr5-132002821-2	chr5	132002712	132002930	+
Merged-chr5-132039938-2	chr5	132039837	132040039	+
Merged-chr5-132878787-2	chr5	132878681	132878893	+
Merged-chr5-132985577-2	chr5	132985392	132985762	+
Merged-chr5-133002518-2	chr5	133002378	133002658	+
Merged-chr5-133370696-2	chr5	133370540	133370852	+
Merged-chr2-170077932-2	chr2	170077816	170078048	+
Merged-chr2-170108053-2	chr2	170107907	170108199	+
Merged-chr2-170199938-2	chr2	170199834	170200043	+
Merged-chr2-170237291-2	chr2	170237147	170237435	+
Merged-chr2-170355665-2	chr2	170355475	170355856	+
Merged-chr2-170597901-2	chr2	170597766	170598036	+
Merged-chr2-171043509-2	chr2	171043393	171043625	+
Merged-chr2-171057014-2	chr2	171056881	171057147	+
Merged-chr2-171105047-2	chr2	171104939	171105155	+
Merged-chr14-44619054-2	chr14	44618930	44619178	+
Merged-chr14-45158441-2	chr14	45158287	45158596	+
Merged-chr14-45250453-2	chr14	45250297	45250610	+
Merged-chr14-45470558-2	chr14	45470442	45470675	+
Merged-chr14-46007330-2	chr14	46007214	46007446	+
Merged-chr14-47609620-2	chr14	47609486	47609754	+
Merged-chr10-111013244-2	chr10	111013130	111013358	+
Merged-chr10-111029783-2	chr10	111029626	111029940	+
Merged-chr10-111349262-2	chr10	111349105	111349420	+
Merged-chr10-111350689-2	chr10	111350576	111350802	+
Merged-chr10-111666791-2	chr10	111666671	111666911	+
Merged-chr10-112869884-2	chr10	112869764	112870004	+
Merged-chr10-113159960-2	chr10	113159855	113160065	+
Merged-chr10-114820177-2	chr10	114820040	114820314	+
Merged-chr10-114859313-2	chr10	114859169	114859457	+
Merged-chr14-48192654-2	chr14	48192464	48192844	+
Merged-chr14-48266632-2	chr14	48266506	48266759	+
Merged-chr14-48368595-2	chr14	48368482	48368709	+
Merged-chr14-48632337-2	chr14	48632225	48632449	+
Merged-chr14-48974107-2	chr14	48973993	48974221	+
Merged-chr14-49373986-2	chr14	49373851	49374122	+
Merged-chr14-49618624-2	chr14	49618466	49618783	+
Merged-chr14-50067557-2	chr14	50067400	50067714	+
Merged-chr10-114906258-2	chr10	114906154	114906363	+
Merged-chr10-114912281-2	chr10	114912138	114912425	+
Merged-chr10-115808281-2	chr10	115808176	115808387	+
Merged-chr10-115859812-2	chr10	115859691	115859933	+
Merged-chr10-115949826-2	chr10	115949722	115949931	+
Merged-chr10-116848825-2	chr10	116848677	116848974	+
Merged-chr10-117175914-2	chr10	117175799	117176030	+
Merged-chr10-117186916-2	chr10	117186804	117187029	+
Merged-chr10-117276195-2	chr10	117276084	117276306	+
Merged-chr14-50438634-2	chr14	50438502	50438766	+
Merged-chr14-50822862-2	chr14	50822750	50822975	+
Merged-chr14-51558395-2	chr14	51558270	51558521	+
Merged-chr14-51799764-2	chr14	51799652	51799877	+
Merged-chr14-51940247-2	chr14	51940107	51940388	+
Merged-chr14-52459692-2	chr14	52459586	52459798	+
Merged-chr14-52642357-2	chr14	52642238	52642476	+
Merged-chr10-117307081-2	chr10	117306912	117307250	+
Merged-chr10-117390380-2	chr10	117390252	117390509	+
Merged-chr10-117482152-2	chr10	117482044	117482261	+
Merged-chr10-117562958-2	chr10	117562805	117563111	+
Merged-chr10-117583124-2	chr10	117583011	117583238	+
Merged-chr10-118274602-2	chr10	118274446	118274759	+
Merged-chr10-119551633-2	chr10	119551523	119551743	+
Merged-chr14-52686184-2	chr14	52686020	52686349	+
Merged-chr14-52734000-2	chr14	52733895	52734105	+
Merged-chr14-53339349-2	chr14	53339200	53339499	+
Merged-chr14-53358085-2	chr14	53357948	53358222	+
Merged-chr14-53566157-2	chr14	53566021	53566293	+
Merged-chr14-53578199-2	chr14	53578097	53578302	+
Merged-chr10-119959136-2	chr10	119959005	119959268	+
Merged-chr10-119960309-2	chr10	119960128	119960491	+
Merged-chr10-120278161-2	chr10	120278061	120278261	+
Merged-chr10-120327903-2	chr10	120327796	120328010	+
Merged-chr10-120771734-2	chr10	120771614	120771854	+
Merged-chr10-120841367-2	chr10	120841193	120841541	+
Merged-chr10-121336914-2	chr10	121336773	121337055	+
Merged-chr10-121856193-2	chr10	121856069	121856318	+
Merged-chr14-53663969-2	chr14	53663849	53664089	+
Merged-chr14-53731804-2	chr14	53731641	53731967	+
Merged-chr14-53889340-2	chr14	53889237	53889444	+
Merged-chr14-54046725-2	chr14	54046590	54046861	+
Merged-chr14-54196871-2	chr14	54196732	54197011	+
Merged-chr14-54270780-2	chr14	54270663	54270897	+
Merged-chr14-54737462-2	chr14	54737338	54737587	+
Merged-chr14-55030961-2	chr14	55030861	55031062	+
Merged-chr10-122147339-2	chr10	122147181	122147497	+
Merged-chr10-122571827-2	chr10	122571699	122571955	+
Merged-chr10-123261989-2	chr10	123261869	123262109	+
Merged-chr10-124013790-2	chr10	124013685	124013896	+
Merged-chr10-125162991-2	chr10	125162835	125163147	+
Merged-chr10-125201597-2	chr10	125201448	125201746	+
Merged-chr10-125339847-2	chr10	125339736	125339958	+
Merged-chr10-126409182-2	chr10	126409081	126409284	+
Merged-chr10-126589818-2	chr10	126589652	126589985	+
Merged-chr10-126662514-2	chr10	126662357	126662672	+
Merged-chr14-55667173-2	chr14	55667026	55667320	+
Merged-chr14-55704967-2	chr14	55704866	55705068	+
Merged-chr14-55803609-2	chr14	55803474	55803744	+
Merged-chr14-55848413-2	chr14	55848253	55848574	+
Merged-chr14-56063902-2	chr14	56063749	56064055	+
Merged-chr14-56170384-2	chr14	56170280	56170489	+
Merged-chr14-56321772-2	chr14	56321656	56321889	+
Merged-chr10-126946504-2	chr10	126946382	126946626	+
Merged-chr10-127254806-2	chr10	127254664	127254948	+
Merged-chr10-127382627-2	chr10	127382493	127382761	+
Merged-chr10-127624481-2	chr10	127624318	127624644	+
Merged-chr10-127740306-2	chr10	127740131	127740482	+
Merged-chr10-127931067-2	chr10	127930941	127931193	+
Merged-chr10-128214872-2	chr10	128214744	128215000	+
Merged-chr14-58275556-2	chr14	58275389	58275724	+
Merged-chr14-58351689-2	chr14	58351570	58351808	+
Merged-chr14-58534382-2	chr14	58534264	58534500	+
Merged-chr14-58706303-2	chr14	58706197	58706409	+
Merged-chr14-58720393-2	chr14	58720275	58720511	+
Merged-chr14-59557691-2	chr14	59557543	59557840	+
Merged-chr14-59873813-2	chr14	59873666	59873960	+
Merged-chr14-59910130-2	chr14	59910011	59910250	+
Merged-chr14-59953927-2	chr14	59953819	59954036	+
Merged-chr10-128221299-2	chr10	128221176	128221423	+
Merged-chr10-129441340-2	chr10	129441172	129441509	+
Merged-chr10-129442410-2	chr10	129442268	129442552	+
Merged-chr11-3181426-2	chr11	3181303	3181549	+
Merged-chr11-3261155-2	chr11	3261037	3261273	+
Merged-chr11-3718120-2	chr11	3717980	3718261	+
Merged-chr14-61601213-2	chr14	61601085	61601342	+
Merged-chr14-63380138-2	chr14	63380032	63380245	+
Merged-chr14-64079749-2	chr14	64079636	64079863	+
Merged-chr14-64106242-2	chr14	64106127	64106358	+
Merged-chr14-64119300-2	chr14	64119199	64119401	+
Merged-chr14-64120722-2	chr14	64120552	64120893	+
Merged-chr14-64131537-2	chr14	64131352	64131723	+
Merged-chr14-64267897-2	chr14	64267721	64268074	+
Merged-chr11-3855040-2	chr11	3854909	3855172	+
Merged-chr11-4341210-2	chr11	4341099	4341322	+
Merged-chr11-4395199-2	chr11	4395097	4395302	+
Merged-chr11-5463151-2	chr11	5463040	5463262	+
Merged-chr11-5641438-2	chr11	5641315	5641561	+
Merged-chr11-5708597-2	chr11	5708447	5708748	+
Merged-chr14-64272039-2	chr14	64271913	64272166	+
Merged-chr14-64300561-2	chr14	64300418	64300705	+
Merged-chr14-65027278-2	chr14	65027126	65027430	+
Merged-chr14-65208679-2	chr14	65208525	65208834	+
Merged-chr14-65261230-2	chr14	65261102	65261359	+
Merged-chr14-65484531-2	chr14	65484375	65484687	+
Merged-chr14-65556191-2	chr14	65556063	65556320	+
Merged-chr11-5824267-2	chr11	5824159	5824376	+
Merged-chr11-6060892-2	chr11	6060768	6061016	+
Merged-chr11-6080942-2	chr11	6080801	6081084	+
Merged-chr11-6260727-2	chr11	6260602	6260852	+
Merged-chr11-6289335-2	chr11	6289183	6289488	+
Merged-chr11-6376367-2	chr11	6376257	6376477	+
Merged-chr11-6645640-2	chr11	6645537	6645744	+
Merged-chr11-6745814-2	chr11	6745694	6745935	+
Merged-chr11-6795280-2	chr11	6795171	6795389	+
Merged-chr14-65636820-2	chr14	65636709	65636931	+
Merged-chr14-66084002-2	chr14	66083887	66084118	+
Merged-chr14-66386797-2	chr14	66386663	66386931	+
Merged-chr14-66444100-2	chr14	66443976	66444225	+
Merged-chr14-66833140-2	chr14	66833000	66833281	+
Merged-chr14-66903811-2	chr14	66903702	66903921	+
Merged-chr14-67381718-2	chr14	67381569	67381867	+
Merged-chr11-6968655-2	chr11	6968543	6968768	+
Merged-chr11-7323687-2	chr11	7323526	7323848	+
Merged-chr11-7559766-2	chr11	7559616	7559916	+
Merged-chr11-7589938-2	chr11	7589820	7590056	+
Merged-chr11-7651132-2	chr11	7650997	7651268	+
Merged-chr11-8063814-2	chr11	8063705	8063924	+
Merged-chr11-8469492-2	chr11	8469371	8469614	+
Merged-chr11-8475791-2	chr11	8475641	8475941	+
Merged-chr11-8505361-2	chr11	8505261	8505462	+
Merged-chrY_random-45853159-2	chrY_random	45853048	45853271	+
Merged-chrY_random-52055673-2	chrY_random	52055563	52055784	+
Merged-chr5-133649244-2	chr5	133649095	133649393	+
Merged-chr5-134151736-2	chr5	134151631	134151842	+
Merged-chr5-134230231-2	chr5	134230107	134230356	+
Merged-chr5-134779691-2	chr5	134779556	134779827	+
Merged-chr5-135307419-2	chr5	135307308	135307530	+
Merged-chr5-135312549-2	chr5	135312447	135312651	+
Merged-chr5-135418895-2	chr5	135418784	135419006	+
Merged-chr2-171400008-2	chr2	171399857	171400160	+
Merged-chr2-171884902-2	chr2	171884770	171885034	+
Merged-chr2-172131288-2	chr2	172131179	172131398	+
Merged-chr2-172303586-2	chr2	172303485	172303687	+
Merged-chr2-172324517-2	chr2	172324415	172324620	+
Merged-chr2-172342287-2	chr2	172342164	172342410	+
Merged-chr2-172402963-2	chr2	172402853	172403074	+
Merged-chr2-172536284-2	chr2	172536179	172536390	+
Merged-chr2-172569707-2	chr2	172569568	172569847	+
Merged-chr2-172591027-2	chr2	172590918	172591137	+
Merged-chr5-135657863-2	chr5	135657701	135658025	+
Merged-chr5-135965368-2	chr5	135965227	135965509	+
Merged-chr5-136119461-2	chr5	136119351	136119571	+
Merged-chr5-136674984-2	chr5	136674876	136675093	+
Merged-chr5-136871901-2	chr5	136871796	136872006	+
Merged-chr5-137112515-2	chr5	137112398	137112633	+
Merged-chr5-137417027-2	chr5	137416853	137417201	+
Merged-chr5-137747400-2	chr5	137747241	137747559	+
Merged-chr2-172634980-2	chr2	172634838	172635123	+
Merged-chr2-173126888-2	chr2	173126760	173127017	+
Merged-chr2-173211392-2	chr2	173211260	173211525	+
Merged-chr2-173833886-2	chr2	173833751	173834021	+
Merged-chr2-173901686-2	chr2	173901545	173901827	+
Merged-chr2-173902922-2	chr2	173902767	173903078	+
Merged-chr2-174086954-2	chr2	174086838	174087070	+
Merged-chr2-174113588-2	chr2	174113445	174113732	+
Merged-chr5-137791111-2	chr5	137790994	137791229	+
Merged-chr5-137835940-2	chr5	137835771	137836109	+
Merged-chr5-138072678-2	chr5	138072570	138072787	+
Merged-chr5-138113346-2	chr5	138113233	138113459	+
Merged-chr5-138228987-2	chr5	138228885	138229089	+
Merged-chr5-138256529-2	chr5	138256386	138256673	+
Merged-chr5-138375230-2	chr5	138375093	138375368	+
Merged-chr5-139467920-2	chr5	139467809	139468031	+
Merged-chr5-139472813-2	chr5	139472700	139472926	+
Merged-chr5-139643731-2	chr5	139643607	139643855	+
Merged-chr2-174491110-2	chr2	174490996	174491224	+
Merged-chr2-174743074-2	chr2	174742934	174743214	+
Merged-chr2-174826573-2	chr2	174826447	174826700	+
Merged-chr2-174840353-2	chr2	174840225	174840481	+
Merged-chr2-175461205-2	chr2	175461065	175461346	+
Merged-chr5-139801837-2	chr5	139801732	139801942	+
Merged-chr5-140420952-2	chr5	140420833	140421072	+
Merged-chr5-140650233-2	chr5	140650110	140650356	+
Merged-chr5-141025883-2	chr5	141025780	141025986	+
Merged-chr5-141088001-2	chr5	141087863	141088140	+
Merged-chr5-142463476-2	chr5	142463352	142463601	+
Merged-chr5-142545064-2	chr5	142544910	142545218	+
Merged-chr5-142606115-2	chr5	142606012	142606218	+
Merged-chr5-142904437-2	chr5	142904324	142904550	+
Merged-chr5-143144201-2	chr5	143144028	143144375	+
Merged-chr2-176616278-2	chr2	176616149	176616408	+
Merged-chr2-176705536-2	chr2	176705411	176705662	+
Merged-chr2-176914301-2	chr2	176914148	176914455	+
Merged-chr2-176941848-2	chr2	176941658	176942039	+
Merged-chr2-177015435-2	chr2	177015299	177015572	+
Merged-chr2-177066231-2	chr2	177066113	177066349	+
Merged-chr2-177255649-2	chr2	177255488	177255811	+
Merged-chr5-143415378-2	chr5	143415241	143415515	+
Merged-chr5-143562533-2	chr5	143562389	143562678	+
Merged-chr5-144844617-2	chr5	144844517	144844718	+
Merged-chr5-144867281-2	chr5	144867172	144867391	+
Merged-chr5-144873773-2	chr5	144873594	144873953	+
Merged-chr5-144944676-2	chr5	144944547	144944806	+
Merged-chr2-177358246-2	chr2	177358086	177358406	+
Merged-chr2-177500987-2	chr2	177500872	177501102	+
Merged-chr2-177571116-2	chr2	177570999	177571234	+
Merged-chr2-177975749-2	chr2	177975627	177975872	+
Merged-chr2-178338220-2	chr2	178338106	178338334	+
Merged-chr2-178856110-2	chr2	178856006	178856214	+
Merged-chr2-179276588-2	chr2	179276424	179276752	+
Merged-chr2-179306091-2	chr2	179305975	179306208	+
Merged-chr2-179500394-2	chr2	179500277	179500511	+
Merged-chr5-145440022-2	chr5	145439919	145440125	+
Merged-chr5-145744364-2	chr5	145744224	145744505	+
Merged-chr5-145857262-2	chr5	145857145	145857380	+
Merged-chr5-146006298-2	chr5	146006191	146006406	+
Merged-chr5-146063492-2	chr5	146063386	146063598	+
Merged-chr5-146066831-2	chr5	146066716	146066946	+
Merged-chr5-146067986-2	chr5	146067846	146068126	+
Merged-chr2-179502351-2	chr2	179502228	179502474	+
Merged-chr2-179527005-2	chr2	179526856	179527154	+
Merged-chr2-179712375-2	chr2	179712246	179712505	+
Merged-chr2-179962344-2	chr2	179962158	179962530	+
Merged-chr2-179981317-2	chr2	179981171	179981464	+
Merged-chr2-180223044-2	chr2	180222930	180223158	+
Merged-chr2-180265468-2	chr2	180265326	180265611	+
Merged-chr2-180413491-2	chr2	180413369	180413614	+
Merged-chr2-180443859-2	chr2	180443694	180444024	+
Merged-chr2-180502508-2	chr2	180502379	180502638	+
Merged-chr5-146718735-2	chr5	146718579	146718892	+
Merged-chr5-147072672-2	chr5	147072540	147072805	+
Merged-chr5-147222577-2	chr5	147222471	147222684	+
Merged-chr5-147532132-2	chr5	147532017	147532247	+
Merged-chr5-147967200-2	chr5	147967096	147967305	+
Merged-chr5-148191225-2	chr5	148191092	148191359	+
Merged-chr5-148224631-2	chr5	148224488	148224774	+
Merged-chr5-148423059-2	chr5	148422935	148423184	+
Merged-chr2-181067498-2	chr2	181067368	181067629	+
Merged-chr3-3371044-2	chr3	3370935	3371153	+
Merged-chr3-3666961-2	chr3	3666836	3667086	+
Merged-chr3-3667926-2	chr3	3667801	3668051	+
Merged-chr3-3962128-2	chr3	3961965	3962292	+
Merged-chr3-4147099-2	chr3	4146990	4147209	+
Merged-chr5-148575799-2	chr5	148575674	148575924	+
Merged-chr5-148622184-2	chr5	148622064	148622304	+
Merged-chr5-148769723-2	chr5	148769590	148769856	+
Merged-chr5-148987438-2	chr5	148987335	148987542	+
Merged-chr5-149263051-2	chr5	149262929	149263174	+
Merged-chr5-149924311-2	chr5	149924194	149924428	+
Merged-chr5-150291130-2	chr5	150291010	150291251	+
Merged-chr5-151239600-2	chr5	151239480	151239720	+
Merged-chr5-151492849-2	chr5	151492736	151492962	+
Merged-chr3-4893314-2	chr3	4893197	4893432	+
Merged-chr3-5427662-2	chr3	5427541	5427783	+
Merged-chr3-5860634-2	chr3	5860531	5860738	+
Merged-chr3-5989278-2	chr3	5989167	5989389	+
Merged-chr3-6173977-2	chr3	6173847	6174108	+
Merged-chr3-6991795-2	chr3	6991691	6991899	+
Merged-chr3-7050510-2	chr3	7050392	7050628	+
Merged-chr3-7052746-2	chr3	7052597	7052895	+
Merged-chr3-7142202-2	chr3	7142056	7142349	+
Merged-chr5-152021433-2	chr5	152021279	152021587	+
Merged-chr5-152273808-2	chr5	152273705	152273912	+
Merged-chr6-3102269-2	chr6	3102118	3102420	+
Merged-chr6-3627972-2	chr6	3627838	3628106	+
Merged-chr6-3825005-2	chr6	3824884	3825126	+
Merged-chr6-4313589-2	chr6	4313414	4313764	+
Merged-chr3-7510270-2	chr3	7510132	7510409	+
Merged-chr3-7566933-2	chr3	7566763	7567103	+
Merged-chr3-7579677-2	chr3	7579535	7579820	+
Merged-chr3-9008738-2	chr3	9008572	9008904	+
Merged-chr6-4689969-2	chr6	4689861	4690077	+
Merged-chr6-4930343-2	chr6	4930222	4930464	+
Merged-chr6-4983380-2	chr6	4983279	4983481	+
Merged-chr6-5069372-2	chr6	5069260	5069485	+
Merged-chr6-5658051-2	chr6	5657890	5658213	+
Merged-chr6-6809846-2	chr6	6809703	6809989	+
Merged-chr6-7392498-2	chr6	7392382	7392614	+
Merged-chr6-7640723-2	chr6	7640578	7640869	+
Merged-chr6-8317382-2	chr6	8317261	8317503	+
Merged-chr3-9244136-2	chr3	9244035	9244238	+
Merged-chr3-9524601-2	chr3	9524477	9524725	+
Merged-chr3-9591981-2	chr3	9591852	9592110	+
Merged-chr3-10486725-2	chr3	10486542	10486908	+
Merged-chr3-10743726-2	chr3	10743586	10743866	+
Merged-chr3-11211659-2	chr3	11211520	11211798	+
Merged-chr14-68239060-2	chr14	68238913	68239208	+
Merged-chr14-68378883-2	chr14	68378773	68378994	+
Merged-chr14-68506406-2	chr14	68506268	68506545	+
Merged-chr14-68631064-2	chr14	68630866	68631263	+
Merged-chr14-68734907-2	chr14	68734787	68735027	+
Merged-chr14-69179040-2	chr14	69178890	69179190	+
Merged-chr14-69772636-2	chr14	69772479	69772794	+
Merged-chr14-70252886-2	chr14	70252773	70252999	+
Merged-chr11-8654684-2	chr11	8654567	8654801	+
Merged-chr11-9017169-2	chr11	9017051	9017287	+
Merged-chr11-9871311-2	chr11	9871176	9871446	+
Merged-chr11-9872459-2	chr11	9872339	9872580	+
Merged-chr11-10237926-2	chr11	10237800	10238053	+
Merged-chr11-10998571-2	chr11	10998437	10998705	+
Merged-chr14-70440234-2	chr14	70440114	70440355	+
Merged-chr14-70474753-2	chr14	70474612	70474894	+
Merged-chr14-70751992-2	chr14	70751820	70752164	+
Merged-chr14-70814685-2	chr14	70814577	70814793	+
Merged-chr14-71023193-2	chr14	71023030	71023357	+
Merged-chr14-71129758-2	chr14	71129608	71129909	+
Merged-chr14-71619189-2	chr14	71619084	71619295	+
Merged-chr14-72201635-2	chr14	72201507	72201763	+
Merged-chr11-11781762-2	chr11	11781651	11781874	+
Merged-chr11-11805154-2	chr11	11804991	11805318	+
Merged-chr11-12412189-2	chr11	12412075	12412303	+
Merged-chr11-12858738-2	chr11	12858581	12858896	+
Merged-chr11-12905694-2	chr11	12905584	12905805	+
Merged-chr11-12906699-2	chr11	12906557	12906842	+
Merged-chr11-12909046-2	chr11	12908887	12909205	+
Merged-chr11-13773515-2	chr11	13773414	13773616	+
Merged-chr11-13823817-2	chr11	13823714	13823920	+
Merged-chr14-73909738-2	chr14	73909632	73909845	+
Merged-chr14-73924741-2	chr14	73924629	73924853	+
Merged-chr14-74709725-2	chr14	74709602	74709848	+
Merged-chr14-76263788-2	chr14	76263600	76263976	+
Merged-chr14-76354809-2	chr14	76354698	76354920	+
Merged-chr11-14059615-2	chr11	14059484	14059746	+
Merged-chr11-14982578-2	chr11	14982432	14982725	+
Merged-chr11-14989187-2	chr11	14989074	14989300	+
Merged-chr11-15068606-2	chr11	15068472	15068740	+
Merged-chr11-15128182-2	chr11	15128066	15128299	+
Merged-chr11-15336005-2	chr11	15335904	15336107	+
Merged-chr11-15784099-2	chr11	15783956	15784243	+
Merged-chr11-16245474-2	chr11	16245316	16245633	+
Merged-chr11-16425902-2	chr11	16425782	16426023	+
Merged-chr14-76589237-2	chr14	76589132	76589342	+
Merged-chr14-76592241-2	chr14	76592126	76592357	+
Merged-chr14-76641888-2	chr14	76641773	76642003	+
Merged-chr14-76644549-2	chr14	76644385	76644714	+
Merged-chr14-76667030-2	chr14	76666899	76667162	+
Merged-chr14-76787965-2	chr14	76787833	76788098	+
Merged-chr14-76894923-2	chr14	76894742	76895105	+
Merged-chr14-77029985-2	chr14	77029879	77030091	+
Merged-chr11-16982322-2	chr11	16982220	16982424	+
Merged-chr11-18073209-2	chr11	18073053	18073366	+
Merged-chr11-18379030-2	chr11	18378888	18379173	+
Merged-chr11-18974361-2	chr11	18974245	18974477	+
Merged-chr11-19384730-2	chr11	19384623	19384837	+
Merged-chr11-19711527-2	chr11	19711383	19711672	+
Merged-chr14-77650702-2	chr14	77650558	77650847	+
Merged-chr14-77919534-2	chr14	77919397	77919671	+
Merged-chr14-78116955-2	chr14	78116816	78117094	+
Merged-chr14-78342252-2	chr14	78342144	78342360	+
Merged-chr14-78617285-2	chr14	78617162	78617409	+
Merged-chr14-78688956-2	chr14	78688852	78689061	+
Merged-chr14-78735077-2	chr14	78734950	78735204	+
Merged-chr11-19750034-2	chr11	19749902	19750167	+
Merged-chr11-19818198-2	chr11	19818060	19818336	+
Merged-chr11-20016871-2	chr11	20016747	20016995	+
Merged-chr11-20034947-2	chr11	20034839	20035056	+
Merged-chr11-20220790-2	chr11	20220659	20220922	+
Merged-chr11-20234422-2	chr11	20234317	20234528	+
Merged-chr11-20377554-2	chr11	20377414	20377695	+
Merged-chr14-78820231-2	chr14	78820098	78820365	+
Merged-chr14-79068381-2	chr14	79068220	79068543	+
Merged-chr14-79083995-2	chr14	79083862	79084128	+
Merged-chr14-79637922-2	chr14	79637794	79638051	+
Merged-chr14-79983597-2	chr14	79983471	79983724	+
Merged-chr14-80262299-2	chr14	80262110	80262488	+
Merged-chr11-20411089-2	chr11	20410898	20411281	+
Merged-chr11-20533923-2	chr11	20533818	20534029	+
Merged-chr11-20783022-2	chr11	20782895	20783149	+
Merged-chr11-22361273-2	chr11	22361159	22361388	+
Merged-chr11-22379997-2	chr11	22379892	22380102	+
Merged-chr11-22507874-2	chr11	22507753	22507996	+
Merged-chr11-22521146-2	chr11	22520977	22521315	+
Merged-chr11-22726385-2	chr11	22726282	22726489	+
Merged-chr11-23229617-2	chr11	23229516	23229719	+
Merged-chr14-80503550-2	chr14	80503449	80503651	+
Merged-chr14-81488249-2	chr14	81488116	81488383	+
Merged-chr14-81879349-2	chr14	81879229	81879469	+
Merged-chr11-25170645-2	chr11	25170487	25170803	+
Merged-chr11-25894283-2	chr11	25894141	25894426	+
Merged-chr11-26003876-2	chr11	26003767	26003986	+
Merged-chr11-27182898-2	chr11	27182772	27183025	+
Merged-chr11-27214473-2	chr11	27214333	27214613	+
Merged-chr11-27502547-2	chr11	27502404	27502691	+
Merged-chr11-27510584-2	chr11	27510432	27510737	+
Merged-chr14-82866649-2	chr14	82866519	82866779	+
Merged-chr14-82892128-2	chr14	82892011	82892245	+
Merged-chr14-83408579-2	chr14	83408430	83408728	+
Merged-chr14-83524629-2	chr14	83524504	83524755	+
Merged-chr14-85090838-2	chr14	85090712	85090965	+
Merged-chr11-27877881-2	chr11	27877738	27878025	+
Merged-chr11-27975729-2	chr11	27975628	27975831	+
Merged-chr11-28071359-2	chr11	28071256	28071463	+
Merged-chr11-28087713-2	chr11	28087564	28087863	+
Merged-chr11-28272582-2	chr11	28272447	28272717	+
Merged-chr11-28948092-2	chr11	28947988	28948197	+
Merged-chr11-29180909-2	chr11	29180799	29181020	+
Merged-chr14-86289530-2	chr14	86289384	86289677	+
Merged-chr14-86598855-2	chr14	86598752	86598958	+
Merged-chr14-86844202-2	chr14	86844100	86844304	+
Merged-chr14-87486970-2	chr14	87486866	87487075	+
Merged-chr14-87816475-2	chr14	87816366	87816584	+
Merged-chr14-88007887-2	chr14	88007695	88008080	+
Merged-chr11-29497247-2	chr11	29497091	29497403	+
Merged-chr11-29649245-2	chr11	29649145	29649346	+
Merged-chr11-29783203-2	chr11	29783099	29783307	+
Merged-chr11-30077350-2	chr11	30077189	30077511	+
Merged-chr11-30644215-2	chr11	30644086	30644345	+
Merged-chr11-30649631-2	chr11	30649496	30649766	+
Merged-chr11-31061866-2	chr11	31061731	31062002	+
Merged-chr11-31880368-2	chr11	31880267	31880470	+
Merged-chr14-88728611-2	chr14	88728472	88728750	+
Merged-chr14-89266500-2	chr14	89266380	89266620	+
Merged-chr14-89725121-2	chr14	89724954	89725288	+
Merged-chr14-90009589-2	chr14	90009477	90009701	+
Merged-chr14-91089682-2	chr14	91089574	91089791	+
Merged-chr11-32735337-2	chr11	32735224	32735451	+
Merged-chr11-32752560-2	chr11	32752442	32752679	+
Merged-chr11-33079925-2	chr11	33079811	33080040	+
Merged-chr11-33397795-2	chr11	33397664	33397926	+
Merged-chr11-33427849-2	chr11	33427727	33427971	+
Merged-chr11-34013132-2	chr11	34013030	34013234	+
Merged-chr11-34197874-2	chr11	34197760	34197988	+
Merged-chr11-34331129-2	chr11	34331013	34331246	+
Merged-chr11-34394954-2	chr11	34394767	34395141	+
Merged-chr6-8611659-2	chr6	8611539	8611780	+
Merged-chr6-8906970-2	chr6	8906869	8907072	+
Merged-chr6-9594080-2	chr6	9593953	9594207	+
Merged-chr6-10042212-2	chr6	10042014	10042410	+
Merged-chr6-10309549-2	chr6	10309445	10309654	+
Merged-chr6-10494256-2	chr6	10494089	10494424	+
Merged-chr3-11212647-2	chr3	11212468	11212827	+
Merged-chr3-11552512-2	chr3	11552336	11552689	+
Merged-chr3-11563997-2	chr3	11563888	11564106	+
Merged-chr3-12369667-2	chr3	12369540	12369795	+
Merged-chr3-12379263-2	chr3	12379116	12379411	+
Merged-chr3-12412088-2	chr3	12411981	12412195	+
Merged-chr3-12837691-2	chr3	12837585	12837797	+
Merged-chr3-13168630-2	chr3	13168507	13168753	+
Merged-chr3-14446835-2	chr3	14446695	14446976	+
Merged-chr6-10640154-2	chr6	10639981	10640328	+
Merged-chr6-10662203-2	chr6	10662103	10662304	+
Merged-chr6-10810969-2	chr6	10810829	10811110	+
Merged-chr6-11493143-2	chr6	11493013	11493273	+
Merged-chr6-12034953-2	chr6	12034850	12035056	+
Merged-chr6-12501401-2	chr6	12501294	12501509	+
Merged-chr6-12765485-2	chr6	12765351	12765620	+
Merged-chr6-12825718-2	chr6	12825595	12825842	+
Merged-chr3-14621458-2	chr3	14621357	14621559	+
Merged-chr3-14706490-2	chr3	14706385	14706595	+
Merged-chr3-15000818-2	chr3	15000700	15000936	+
Merged-chr3-15046718-2	chr3	15046611	15046826	+
Merged-chr3-15055997-2	chr3	15055874	15056120	+
Merged-chr3-15057014-2	chr3	15056847	15057181	+
Merged-chr3-15274444-2	chr3	15274343	15274546	+
Merged-chr3-16652227-2	chr3	16652127	16652328	+
Merged-chr3-16841475-2	chr3	16841321	16841629	+
Merged-chr3-17389929-2	chr3	17389819	17390040	+
Merged-chr6-13803954-2	chr6	13803798	13804111	+
Merged-chr6-14041810-2	chr6	14041673	14041948	+
Merged-chr6-14254514-2	chr6	14254396	14254633	+
Merged-chr6-14436851-2	chr6	14436742	14436960	+
Merged-chr6-16312304-2	chr6	16312197	16312412	+
Merged-chr6-16315605-2	chr6	16315487	16315723	+
Merged-chr6-16683493-2	chr6	16683370	16683617	+
Merged-chr6-18175199-2	chr6	18175037	18175362	+
Merged-chr3-17687342-2	chr3	17687210	17687474	+
Merged-chr3-17813969-2	chr3	17813837	17814102	+
Merged-chr3-18156780-2	chr3	18156677	18156883	+
Merged-chr3-18481102-2	chr3	18481001	18481203	+
Merged-chr3-18524168-2	chr3	18524030	18524307	+
Merged-chr3-18595646-2	chr3	18595534	18595759	+
Merged-chr3-18729200-2	chr3	18729040	18729360	+
Merged-chr3-19134712-2	chr3	19134606	19134819	+
Merged-chr3-19797395-2	chr3	19797279	19797511	+
Merged-chr3-19924064-2	chr3	19923944	19924185	+
Merged-chr6-18588641-2	chr6	18588509	18588774	+
Merged-chr6-19534573-2	chr6	19534423	19534723	+
Merged-chr6-20568756-2	chr6	20568606	20568906	+
Merged-chr6-20570791-2	chr6	20570676	20570907	+
Merged-chr6-20637357-2	chr6	20637256	20637459	+
Merged-chr6-22386256-2	chr6	22386141	22386372	+
Merged-chr3-21371856-2	chr3	21371713	21372000	+
Merged-chr3-21564414-2	chr3	21564280	21564548	+
Merged-chr3-21571650-2	chr3	21571513	21571788	+
Merged-chr3-21597458-2	chr3	21597322	21597595	+
Merged-chr3-21791219-2	chr3	21791090	21791348	+
Merged-chr3-21834858-2	chr3	21834748	21834969	+
Merged-chr3-22092089-2	chr3	22091977	22092201	+
Merged-chr3-22193158-2	chr3	22193040	22193277	+
Merged-chr3-22311335-2	chr3	22311138	22311533	+
Merged-chr6-22632980-2	chr6	22632832	22633129	+
Merged-chr6-23039512-2	chr6	23039370	23039654	+
Merged-chr6-23040508-2	chr6	23040394	23040623	+
Merged-chr6-23843688-2	chr6	23843576	23843800	+
Merged-chr6-24878061-2	chr6	24877911	24878211	+
Merged-chr6-25257677-2	chr6	25257563	25257792	+
Merged-chr3-22889302-2	chr3	22889156	22889448	+
Merged-chr3-23304050-2	chr3	23303926	23304174	+
Merged-chr3-24050527-2	chr3	24050408	24050646	+
Merged-chr3-24905847-2	chr3	24905731	24905964	+
Merged-chr3-25175506-2	chr3	25175367	25175646	+
Merged-chr6-25568073-2	chr6	25567953	25568193	+
Merged-chr6-25569067-2	chr6	25568907	25569228	+
Merged-chr6-25828894-2	chr6	25828783	25829005	+
Merged-chr6-29582750-2	chr6	29582632	29582869	+
Merged-chr6-29739007-2	chr6	29738879	29739136	+
Merged-chr6-29800917-2	chr6	29800817	29801018	+
Merged-chr6-29977115-2	chr6	29976993	29977237	+
Merged-chr6-30103268-2	chr6	30103099	30103437	+
Merged-chr3-27053965-2	chr3	27053865	27054066	+
Merged-chr3-27405972-2	chr3	27405858	27406086	+
Merged-chr3-27602518-2	chr3	27602386	27602650	+
Merged-chr3-28013000-2	chr3	28012865	28013135	+
Merged-chr3-28116034-2	chr3	28115927	28116142	+
Merged-chr3-28551651-2	chr3	28551529	28551774	+
Merged-chr3-28704343-2	chr3	28704218	28704469	+
Merged-chr3-28741359-2	chr3	28741193	28741525	+
Merged-chr6-31177632-2	chr6	31177511	31177753	+
Merged-chr6-31190204-2	chr6	31190093	31190316	+
Merged-chr6-31898344-2	chr6	31898209	31898480	+
Merged-chr6-32152846-2	chr6	32152726	32152966	+
Merged-chr6-33404518-2	chr6	33404388	33404648	+
Merged-chr6-34137729-2	chr6	34137623	34137835	+
Merged-chr6-34294388-2	chr6	34294246	34294530	+
Merged-chr3-28751246-2	chr3	28751131	28751361	+
Merged-chr3-28845214-2	chr3	28845074	28845354	+
Merged-chr3-29035140-2	chr3	29035030	29035250	+
Merged-chr3-29503408-2	chr3	29503282	29503534	+
Merged-chr3-29835939-2	chr3	29835835	29836043	+
Merged-chr3-30623454-2	chr3	30623345	30623564	+
Merged-chr3-30788138-2	chr3	30788005	30788272	+
Merged-chr6-34504778-2	chr6	34504674	34504883	+
Merged-chr6-35186343-2	chr6	35186207	35186480	+
Merged-chr6-35736408-2	chr6	35736305	35736511	+
Merged-chr6-37328013-2	chr6	37327881	37328145	+
Merged-chr6-37608328-2	chr6	37608221	37608436	+
Merged-chr6-37639904-2	chr6	37639801	37640007	+
Merged-chr6-37717798-2	chr6	37717684	37717912	+
Merged-chr3-30905911-2	chr3	30905798	30906025	+
Merged-chr3-30916798-2	chr3	30916637	30916959	+
Merged-chr3-30988465-2	chr3	30988337	30988594	+
Merged-chr3-31654992-2	chr3	31654854	31655131	+
Merged-chr3-31902524-2	chr3	31902373	31902675	+
Merged-chr3-32018866-2	chr3	32018758	32018975	+
Merged-chr3-32529316-2	chr3	32529215	32529418	+
Merged-chr6-37814497-2	chr6	37814394	37814600	+
Merged-chr6-38431404-2	chr6	38431281	38431528	+
Merged-chr6-38680577-2	chr6	38680457	38680698	+
Merged-chr6-39024398-2	chr6	39024266	39024531	+
Merged-chr6-39227511-2	chr6	39227392	39227631	+
Merged-chr3-32732986-2	chr3	32732874	32733098	+
Merged-chr3-33222940-2	chr3	33222827	33223053	+
Merged-chr3-33906687-2	chr3	33906528	33906846	+
Merged-chr3-33934837-2	chr3	33934706	33934968	+
Merged-chr3-34369080-2	chr3	34368931	34369229	+
Merged-chr3-34545361-2	chr3	34545232	34545491	+
Merged-chr3-34552959-2	chr3	34552832	34553086	+
Merged-chr3-34657058-2	chr3	34656891	34657226	+
Merged-chr6-39246084-2	chr6	39245939	39246230	+
Merged-chr6-39350397-2	chr6	39350249	39350546	+
Merged-chr6-41365157-2	chr6	41365051	41365263	+
Merged-chr6-42331038-2	chr6	42330929	42331147	+
Merged-chr3-35001071-2	chr3	35000926	35001217	+
Merged-chr3-35770412-2	chr3	35770293	35770531	+
Merged-chr3-36421199-2	chr3	36421062	36421337	+
Merged-chr3-36499982-2	chr3	36499856	36500109	+
Merged-chr3-36813071-2	chr3	36812949	36813194	+
Merged-chr3-37874416-2	chr3	37874290	37874542	+
Merged-chr14-91630871-2	chr14	91630717	91631025	+
Merged-chr14-92431273-2	chr14	92431130	92431417	+
Merged-chr14-93226118-2	chr14	93225994	93226242	+
Merged-chr14-93482558-2	chr14	93482446	93482671	+
Merged-chr11-35452656-2	chr11	35452505	35452807	+
Merged-chr11-35602145-2	chr11	35602041	35602250	+
Merged-chr11-35614958-2	chr11	35614842	35615074	+
Merged-chr11-36272312-2	chr11	36272175	36272450	+
Merged-chr11-36367058-2	chr11	36366951	36367166	+
Merged-chr11-36376592-2	chr11	36376492	36376693	+
Merged-chr11-37934974-2	chr11	37934869	37935080	+
Merged-chr11-39410187-2	chr11	39410071	39410304	+
Merged-chr14-94848650-2	chr14	94848523	94848777	+
Merged-chr14-95196220-2	chr14	95196046	95196395	+
Merged-chr14-95967482-2	chr14	95967289	95967676	+
Merged-chr14-95985138-2	chr14	95985000	95985277	+
Merged-chr11-39492202-2	chr11	39492079	39492326	+
Merged-chr11-39884012-2	chr11	39883844	39884181	+
Merged-chr11-41037475-2	chr11	41037337	41037613	+
Merged-chr11-41923369-2	chr11	41923267	41923472	+
Merged-chr11-42719189-2	chr11	42719023	42719356	+
Merged-chr14-96157576-2	chr14	96157475	96157678	+
Merged-chr14-99739349-2	chr14	99739159	99739539	+
Merged-chr14-99753454-2	chr14	99753321	99753588	+
Merged-chr14-99909514-2	chr14	99909357	99909672	+
Merged-chr11-43198777-2	chr11	43198665	43198890	+
Merged-chr11-43268678-2	chr11	43268567	43268790	+
Merged-chr11-43566689-2	chr11	43566561	43566817	+
Merged-chr11-43765919-2	chr11	43765818	43766021	+
Merged-chr11-44049143-2	chr11	44049012	44049274	+
Merged-chr11-44206732-2	chr11	44206606	44206859	+
Merged-chr11-44522942-2	chr11	44522798	44523086	+
Merged-chr11-44655429-2	chr11	44655308	44655550	+
Merged-chr14-99936737-2	chr14	99936567	99936907	+
Merged-chr14-100185750-2	chr14	100185622	100185878	+
Merged-chr14-100343507-2	chr14	100343366	100343649	+
Merged-chr14-100700339-2	chr14	100700208	100700471	+
Merged-chr14-100749840-2	chr14	100749734	100749947	+
Merged-chr14-101120076-2	chr14	101119970	101120183	+
Merged-chr14-101388690-2	chr14	101388550	101388830	+
Merged-chr11-44677676-2	chr11	44677568	44677784	+
Merged-chr11-45552362-2	chr11	45552249	45552476	+
Merged-chr11-45834004-2	chr11	45833883	45834125	+
Merged-chr11-45882430-2	chr11	45882316	45882545	+
Merged-chr11-46068913-2	chr11	46068804	46069022	+
Merged-chr11-46225266-2	chr11	46225141	46225391	+
Merged-chr11-46686651-2	chr11	46686539	46686763	+
Merged-chr11-47454298-2	chr11	47454198	47454399	+
Merged-chr11-47814284-2	chr11	47814183	47814385	+
Merged-chr14-101959892-2	chr14	101959758	101960026	+
Merged-chr14-101981054-2	chr14	101980935	101981173	+
Merged-chr14-102868721-2	chr14	102868616	102868827	+
Merged-chr14-103131044-2	chr14	103130937	103131152	+
Merged-chr14-103473554-2	chr14	103473417	103473691	+
Merged-chr14-103477711-2	chr14	103477607	103477816	+
Merged-chr14-104034973-2	chr14	104034838	104035109	+
Merged-chr11-48672720-2	chr11	48672599	48672841	+
Merged-chr11-49206444-2	chr11	49206330	49206559	+
Merged-chr11-50191021-2	chr11	50190890	50191153	+
Merged-chr14-105188719-2	chr14	105188536	105188903	+
Merged-chr14-105419367-2	chr14	105419233	105419502	+
Merged-chr14-105578600-2	chr14	105578464	105578736	+
Merged-chr14-105648386-2	chr14	105648280	105648492	+
Merged-chr14-105826813-2	chr14	105826710	105826916	+
Merged-chr14-106260371-2	chr14	106260222	106260521	+
Merged-chr11-50204932-2	chr11	50204806	50205059	+
Merged-chr11-50270742-2	chr11	50270642	50270843	+
Merged-chr11-50939409-2	chr11	50939282	50939537	+
Merged-chr11-51088109-2	chr11	51087960	51088258	+
Merged-chr11-51483298-2	chr11	51483131	51483465	+
Merged-chr11-51547932-2	chr11	51547826	51548039	+
Merged-chr11-51636438-2	chr11	51636280	51636596	+
Merged-chr1-30605872-2	chr1	30605745	30605999	+
Merged-chr14-106320251-2	chr14	106320109	106320393	+
Merged-chr1-30955750-2	chr1	30955635	30955866	+
Merged-chr14-107227002-2	chr14	107226833	107227172	+
Merged-chr1-31290705-2	chr1	31290599	31290811	+
Merged-chr14-107847529-2	chr14	107847408	107847650	+
Merged-chr1-31527574-2	chr1	31527454	31527694	+
Merged-chr14-109048752-2	chr14	109048651	109048853	+
Merged-chr14-109078116-2	chr14	109077988	109078245	+
Merged-chr1-34164497-2	chr1	34164390	34164605	+
Merged-chr11-52100157-2	chr11	52100035	52100280	+
Merged-chr11-52153786-2	chr11	52153676	52153896	+
Merged-chr11-52171001-2	chr11	52170819	52171184	+
Merged-chr11-52173453-2	chr11	52173333	52173573	+
Merged-chr11-53016015-2	chr11	53015885	53016145	+
Merged-chr11-53074291-2	chr11	53074153	53074429	+
Merged-chr11-53209178-2	chr11	53209016	53209340	+
Merged-chr11-53413079-2	chr11	53412966	53413192	+
Merged-chr11-54015614-2	chr11	54015490	54015739	+
Merged-chr11-54125753-2	chr11	54125649	54125858	+
Merged-chr1-34213141-2	chr1	34213011	34213272	+
Merged-chr14-110764131-2	chr14	110764014	110764248	+
Merged-chr1-34678016-2	chr1	34677905	34678128	+
Merged-chr1-35172634-2	chr1	35172473	35172795	+
Merged-chr1-35251151-2	chr1	35251008	35251294	+
Merged-chr14-111828674-2	chr14	111828539	111828810	+
Merged-chr1-35277432-2	chr1	35277320	35277545	+
Merged-chr14-112662544-2	chr14	112662439	112662649	+
Merged-chr1-35289698-2	chr1	35289548	35289849	+
Merged-chr1-35754830-2	chr1	35754699	35754962	+
Merged-chr1-35806450-2	chr1	35806338	35806562	+
Merged-chr14-112766363-2	chr14	112766191	112766535	+
Merged-chr11-54559042-2	chr11	54558920	54559165	+
Merged-chr11-54785415-2	chr11	54785297	54785533	+
Merged-chr11-54796223-2	chr11	54796102	54796344	+
Merged-chr11-55061069-2	chr11	55060925	55061213	+
Merged-chr11-55304088-2	chr11	55303985	55304192	+
Merged-chr11-55760384-2	chr11	55760278	55760491	+
Merged-chr11-56522553-2	chr11	56522417	56522690	+
Merged-chr11-56625819-2	chr11	56625713	56625926	+
Merged-chr11-57356560-2	chr11	57356397	57356723	+
Merged-chr11-57627340-2	chr11	57627197	57627483	+
Merged-chr1-35845578-2	chr1	35845379	35845778	+
Merged-chr1-36001349-2	chr1	36001209	36001489	+
Merged-chr14-113058079-2	chr14	113057966	113058193	+
Merged-chr1-36100963-2	chr1	36100853	36101073	+
Merged-chr14-113687783-2	chr14	113687653	113687914	+
Merged-chr1-36106716-2	chr1	36106579	36106853	+
Merged-chr14-114184452-2	chr14	114184288	114184616	+
Merged-chr14-114460754-2	chr14	114460644	114460865	+
Merged-chr1-36570707-2	chr1	36570588	36570827	+
Merged-chr14-114589436-2	chr14	114589294	114589578	+
Merged-chr1-36825638-2	chr1	36825510	36825766	+
Merged-chr1-37039520-2	chr1	37039411	37039630	+
Merged-chr11-57784300-2	chr11	57784192	57784408	+
Merged-chr11-58457046-2	chr11	58456898	58457195	+
Merged-chr11-58912039-2	chr11	58911926	58912152	+
Merged-chr11-59272611-2	chr11	59272492	59272730	+
Merged-chr11-59595910-2	chr11	59595806	59596015	+
Merged-chr11-59627983-2	chr11	59627847	59628119	+
Merged-chr11-59652561-2	chr11	59652452	59652670	+
Merged-chr14-115440156-2	chr14	115440034	115440278	+
Merged-chr14-115441694-2	chr14	115441560	115441829	+
Merged-chr1-37106137-2	chr1	37105996	37106278	+
Merged-chr1-37117498-2	chr1	37117388	37117609	+
Merged-chr14-116334312-2	chr14	116334197	116334428	+
Merged-chr14-116542061-2	chr14	116541947	116542176	+
Merged-chr1-37158787-2	chr1	37158648	37158926	+
Merged-chr14-116595293-2	chr14	116595148	116595438	+
Merged-chr1-37217807-2	chr1	37217658	37217957	+
Merged-chr14-117268811-2	chr14	117268654	117268968	+
Merged-chr1-37269432-2	chr1	37269316	37269549	+
Merged-chr14-117281990-2	chr14	117281853	117282128	+
Merged-chr1-37556659-2	chr1	37556548	37556771	+
Merged-chr14-117297409-2	chr14	117297291	117297528	+
Merged-chr11-60230628-2	chr11	60230497	60230759	+
Merged-chr11-60236718-2	chr11	60236571	60236865	+
Merged-chr11-60253422-2	chr11	60253309	60253535	+
Merged-chr11-60268031-2	chr11	60267915	60268148	+
Merged-chr11-60736711-2	chr11	60736579	60736843	+
Merged-chr11-60919866-2	chr11	60919730	60920002	+
Merged-chr1-38115427-2	chr1	38115320	38115534	+
Merged-chr1-38926385-2	chr1	38926248	38926522	+
Merged-chr1-39179705-2	chr1	39179560	39179851	+
Merged-chr1-39590998-2	chr1	39590890	39591107	+
Merged-chr1-39867488-2	chr1	39867321	39867655	+
Merged-chr1-39957560-2	chr1	39957415	39957706	+
Merged-chr1-39959771-2	chr1	39959665	39959877	+
Merged-chr1-40360200-2	chr1	40360083	40360318	+
Merged-chr1-40363181-2	chr1	40363028	40363334	+
Merged-chr1-40737098-2	chr1	40736965	40737232	+
Merged-chr1-41197542-2	chr1	41197383	41197702	+
Merged-chr1-41447364-2	chr1	41447231	41447498	+
Merged-chr1-42115558-2	chr1	42115410	42115707	+
Merged-chr1-42243335-2	chr1	42243234	42243437	+
Merged-chr1-42300435-2	chr1	42300291	42300580	+
Merged-chr1-43151238-2	chr1	43151079	43151398	+
Merged-chr1-44348139-2	chr1	44347991	44348287	+
Merged-chr1-44417787-2	chr1	44417657	44417917	+
Merged-chr1-44437919-2	chr1	44437804	44438035	+
Merged-chr1-44670482-2	chr1	44670378	44670587	+
Merged-chr1-44948621-2	chr1	44948502	44948741	+
Merged-chr1-45415027-2	chr1	45414886	45415168	+
Merged-chr1-46399704-2	chr1	46399600	46399809	+
Merged-chr1-46709823-2	chr1	46709689	46709958	+
Merged-chr1-47363959-2	chr1	47363828	47364091	+
Merged-chr1-48014660-2	chr1	48014542	48014779	+
Merged-chr1-48709608-2	chr1	48709485	48709732	+
Merged-chr1-48730168-2	chr1	48730011	48730326	+
Merged-chr1-49942337-2	chr1	49942226	49942449	+
Merged-chr1-50217085-2	chr1	50216952	50217219	+
Merged-chr1-50246107-2	chr1	50245991	50246224	+
Merged-chr1-51963555-2	chr1	51963437	51963673	+
Merged-chr1-52065395-2	chr1	52065253	52065538	+
Merged-chr1-52921293-2	chr1	52921165	52921422	+
Merged-chr1-53010453-2	chr1	53010335	53010571	+
Merged-chr1-53292976-2	chr1	53292848	53293105	+
Merged-chr1-53562232-2	chr1	53562123	53562342	+
Merged-chr3-40194114-2	chr3	40193950	40194279	+
Merged-chr3-40355178-2	chr3	40355068	40355289	+
Merged-chr3-40682646-2	chr3	40682529	40682764	+
Merged-chr3-40903720-2	chr3	40903616	40903824	+
Merged-chr3-41258430-2	chr3	41258325	41258535	+
Merged-chr3-41606503-2	chr3	41606310	41606697	+
Merged-chr3-43706038-2	chr3	43705916	43706160	+
Merged-chr3-44454357-2	chr3	44454241	44454474	+
Merged-chr3-44910337-2	chr3	44910216	44910458	+
Merged-chr3-44921428-2	chr3	44921318	44921538	+
Merged-chr3-46454847-2	chr3	46454741	46454954	+
Merged-chr3-46491980-2	chr3	46491879	46492082	+
Merged-chr3-46674025-2	chr3	46673863	46674187	+
Merged-chr3-46675050-2	chr3	46674950	46675151	+
Merged-chr3-51012757-2	chr3	51012637	51012877	+
Merged-chr3-51157474-2	chr3	51157355	51157593	+
Merged-chr3-51420636-2	chr3	51420476	51420797	+
Merged-chr3-51535972-2	chr3	51535866	51536079	+
Merged-chr3-52058319-2	chr3	52058151	52058488	+
Merged-chr3-52190486-2	chr3	52190372	52190600	+
Merged-chr3-52760332-2	chr3	52760220	52760444	+
Merged-chr3-53006504-2	chr3	53006383	53006626	+
Merged-chr3-53261886-2	chr3	53261777	53261995	+
Merged-chr3-53454296-2	chr3	53454177	53454416	+
Merged-chr3-54676387-2	chr3	54676263	54676511	+
Merged-chr3-54794135-2	chr3	54794023	54794247	+
Merged-chr3-55286830-2	chr3	55286674	55286987	+
Merged-chr3-57379835-2	chr3	57379703	57379968	+
Merged-chr3-59684254-2	chr3	59684151	59684358	+
Merged-chr3-59910543-2	chr3	59910425	59910662	+
Merged-chr3-60298254-2	chr3	60298089	60298420	+
Merged-chr3-60659889-2	chr3	60659772	60660006	+
Merged-chr3-61050618-2	chr3	61050475	61050762	+
Merged-chr3-61283273-2	chr3	61283085	61283461	+
Merged-chr3-61600207-2	chr3	61600092	61600323	+
Merged-chr3-61717316-2	chr3	61717179	61717453	+
Merged-chr3-62742787-2	chr3	62742670	62742905	+
Merged-chr3-63176472-2	chr3	63176361	63176583	+
Merged-chr3-63703398-2	chr3	63703290	63703507	+
Merged-chr3-64069748-2	chr3	64069601	64069896	+
Merged-chr3-65333427-2	chr3	65333316	65333538	+
Merged-chr3-65461376-2	chr3	65461229	65461524	+
Merged-chr3-66491232-2	chr3	66491080	66491384	+
Merged-chr3-66955674-2	chr3	66955563	66955785	+
Merged-chr3-68369194-2	chr3	68369010	68369378	+
Merged-chr3-69326369-2	chr3	69326265	69326474	+
Merged-chr3-72662926-2	chr3	72662821	72663032	+
Merged-chr3-72810114-2	chr3	72810007	72810221	+
Merged-chr3-75454684-2	chr3	75454520	75454848	+
Merged-chr3-75455904-2	chr3	75455757	75456051	+
Merged-chr3-75878355-2	chr3	75878235	75878475	+
Merged-chr3-76543278-2	chr3	76543132	76543424	+
Merged-chr3-78356788-2	chr3	78356634	78356942	+
Merged-chr3-79221089-2	chr3	79220987	79221192	+
Merged-chr3-79239153-2	chr3	79239031	79239276	+
Merged-chr3-80906389-2	chr3	80906279	80906500	+
Merged-chr3-81800086-2	chr3	81799981	81800191	+
Merged-chr3-82127612-2	chr3	82127507	82127717	+
Merged-chr3-82245729-2	chr3	82245615	82245844	+
Merged-chr3-82291518-2	chr3	82291400	82291636	+
Merged-chr3-83390265-2	chr3	83390142	83390389	+
Merged-chr3-83393165-2	chr3	83393021	83393309	+
Merged-chr11-61342834-2	chr11	61342722	61342947	+
Merged-chr11-61397701-2	chr11	61397532	61397870	+
Merged-chr11-61623460-2	chr11	61623357	61623563	+
Merged-chr11-61853823-2	chr11	61853720	61853927	+
Merged-chr11-62028733-2	chr11	62028578	62028889	+
Merged-chr11-62322256-2	chr11	62322075	62322438	+
Merged-chr11-62324827-2	chr11	62324725	62324930	+
Merged-chr11-63084840-2	chr11	63084681	63084999	+
Merged-chr11-63090419-2	chr11	63090300	63090538	+
Merged-chr11-63163928-2	chr11	63163807	63164050	+
Merged-chr11-63227260-2	chr11	63227139	63227382	+
Merged-chr11-63268872-2	chr11	63268722	63269022	+
Merged-chr11-63270037-2	chr11	63269928	63270146	+
Merged-chr11-63711980-2	chr11	63711876	63712084	+
Merged-chr11-63766336-2	chr11	63766210	63766463	+
Merged-chr11-65271953-2	chr11	65271778	65272129	+
Merged-chr11-66825331-2	chr11	66825208	66825454	+
Merged-chr11-66831590-2	chr11	66831473	66831708	+
Merged-chr11-67159319-2	chr11	67159160	67159479	+
Merged-chr11-67189979-2	chr11	67189856	67190102	+
Merged-chr11-67960251-2	chr11	67960101	67960402	+
Merged-chr11-68887030-2	chr11	68886899	68887162	+
Merged-chr11-68937142-2	chr11	68937041	68937244	+
Merged-chr11-69231123-2	chr11	69230957	69231290	+
Merged-chr11-69419585-2	chr11	69419436	69419734	+
Merged-chr11-70169675-2	chr11	70169525	70169825	+
Merged-chr11-70574037-2	chr11	70573913	70574161	+
Merged-chr11-70857576-2	chr11	70857456	70857696	+
Merged-chr11-71315858-2	chr11	71315743	71315974	+
Merged-chr11-71532666-2	chr11	71532543	71532790	+
Merged-chr11-72234172-2	chr11	72234055	72234290	+
Merged-chr11-72390261-2	chr11	72390137	72390385	+
Merged-chr11-72409121-2	chr11	72409015	72409227	+
Merged-chr11-72861261-2	chr11	72861140	72861382	+
Merged-chr11-74362517-2	chr11	74362358	74362677	+
Merged-chr11-74534348-2	chr11	74534246	74534450	+
Merged-chr11-75004049-2	chr11	75003943	75004156	+
Merged-chr11-75423817-2	chr11	75423666	75423968	+
Merged-chr11-75435222-2	chr11	75435121	75435324	+
Merged-chr11-75649874-2	chr11	75649771	75649978	+
Merged-chr11-76060515-2	chr11	76060400	76060631	+
Merged-chr11-76133467-2	chr11	76133355	76133580	+
Merged-chr11-76375940-2	chr11	76375808	76376073	+
Merged-chr1-53638383-2	chr1	53638242	53638524	+
Merged-chr1-53806923-2	chr1	53806782	53807064	+
Merged-chr1-53807843-2	chr1	53807699	53807988	+
Merged-chr1-53880782-2	chr1	53880645	53880919	+
Merged-chr1-54500707-2	chr1	54500580	54500835	+
Merged-chr1-54541882-2	chr1	54541737	54542028	+
Merged-chr1-54642476-2	chr1	54642346	54642607	+
Merged-chr1-54664030-2	chr1	54663921	54664139	+
Merged-chr1-55165548-2	chr1	55165409	55165687	+
Merged-chr1-56901543-2	chr1	56901406	56901681	+
Merged-chr11-76615487-2	chr11	76615364	76615610	+
Merged-chr11-76913896-2	chr11	76913774	76914018	+
Merged-chr11-77487238-2	chr11	77487039	77487437	+
Merged-chr11-77493611-2	chr11	77493428	77493795	+
Merged-chr11-77552308-2	chr11	77552188	77552428	+
Merged-chr11-77589656-2	chr11	77589518	77589794	+
Merged-chr11-77706279-2	chr11	77706148	77706411	+
Merged-chr11-77707523-2	chr11	77707390	77707656	+
Merged-chr1-56995496-2	chr1	56995385	56995607	+
Merged-chr1-57366016-2	chr1	57365826	57366207	+
Merged-chr1-57390740-2	chr1	57390632	57390849	+
Merged-chr1-57527394-2	chr1	57527235	57527554	+
Merged-chr1-57669266-2	chr1	57669119	57669413	+
Merged-chr1-57830932-2	chr1	57830828	57831037	+
Merged-chr1-58426796-2	chr1	58426682	58426910	+
Merged-chr1-58564339-2	chr1	58564232	58564447	+
Merged-chr1-58627525-2	chr1	58627375	58627676	+
Merged-chr1-58643368-2	chr1	58643254	58643483	+
Merged-chr11-77761660-2	chr11	77761544	77761777	+
Merged-chr11-77951295-2	chr11	77951163	77951427	+
Merged-chr11-78214646-2	chr11	78214529	78214763	+
Merged-chr11-78234866-2	chr11	78234757	78234975	+
Merged-chr11-78322894-2	chr11	78322770	78323019	+
Merged-chr11-78817251-2	chr11	78817140	78817362	+
Merged-chr1-59015017-2	chr1	59014897	59015137	+
Merged-chr1-59433443-2	chr1	59433290	59433597	+
Merged-chr1-59483862-2	chr1	59483747	59483977	+
Merged-chr1-60844860-2	chr1	60844751	60844970	+
Merged-chr1-60907974-2	chr1	60907845	60908104	+
Merged-chr11-78907166-2	chr11	78907052	78907280	+
Merged-chr11-79005948-2	chr11	79005793	79006104	+
Merged-chr11-79178651-2	chr11	79178548	79178755	+
Merged-chr11-79460142-2	chr11	79459989	79460295	+
Merged-chr11-79566249-2	chr11	79566072	79566426	+
Merged-chr11-79790338-2	chr11	79790196	79790480	+
Merged-chr11-80149477-2	chr11	80149337	80149617	+
Merged-chr11-80332227-2	chr11	80332113	80332342	+
Merged-chr11-80855352-2	chr11	80855247	80855458	+
Merged-chr11-81144710-2	chr11	81144592	81144829	+
Merged-chr1-61475446-2	chr1	61475310	61475582	+
Merged-chr1-61476889-2	chr1	61476704	61477075	+
Merged-chr1-62444984-2	chr1	62444856	62445113	+
Merged-chr1-62697332-2	chr1	62697229	62697436	+
Merged-chr1-62830341-2	chr1	62830223	62830460	+
Merged-chr1-63223497-2	chr1	63223361	63223633	+
Merged-chr1-63987538-2	chr1	63987421	63987655	+
Merged-chr11-81359459-2	chr11	81359358	81359560	+
Merged-chr11-81426718-2	chr11	81426604	81426832	+
Merged-chr11-81430097-2	chr11	81429966	81430228	+
Merged-chr11-82151152-2	chr11	82151007	82151297	+
Merged-chr11-82831018-2	chr11	82830893	82831143	+
Merged-chr11-83085077-2	chr11	83084953	83085202	+
Merged-chr11-83309180-2	chr11	83309071	83309289	+
Merged-chr11-83788183-2	chr11	83788070	83788297	+
Merged-chr11-84090575-2	chr11	84090439	84090711	+
Merged-chr1-64352358-2	chr1	64352162	64352554	+
Merged-chr1-64780235-2	chr1	64780129	64780341	+
Merged-chr1-64931739-2	chr1	64931586	64931892	+
Merged-chr1-65013455-2	chr1	65013341	65013569	+
Merged-chr1-65087473-2	chr1	65087337	65087610	+
Merged-chr1-65339486-2	chr1	65339353	65339620	+
Merged-chr1-65938173-2	chr1	65937993	65938354	+
Merged-chr1-66746628-2	chr1	66746505	66746751	+
Merged-chr1-67007620-2	chr1	67007504	67007736	+
Merged-chr1-67154228-2	chr1	67154108	67154348	+
Merged-chr1-67354304-2	chr1	67354172	67354436	+
Merged-chr1-67982556-2	chr1	67982423	67982690	+
Merged-chr1-68658004-2	chr1	68657895	68658113	+
Merged-chr1-69506696-2	chr1	69506589	69506803	+
Merged-chr1-69914511-2	chr1	69914396	69914627	+
Merged-chr1-70284105-2	chr1	70283936	70284275	+
Merged-chr1-71082294-2	chr1	71082106	71082482	+
Merged-chr1-71578382-2	chr1	71578281	71578483	+
Merged-chr1-71692755-2	chr1	71692640	71692870	+
Merged-chr1-71720274-2	chr1	71720144	71720405	+
Merged-chr1-72251949-2	chr1	72251834	72252064	+
Merged-chr1-72260703-2	chr1	72260601	72260806	+
Merged-chr1-72275741-2	chr1	72275584	72275898	+
Merged-chr1-72283600-2	chr1	72283493	72283707	+
Merged-chr1-72290962-2	chr1	72290836	72291089	+
Merged-chr1-73547447-2	chr1	73547328	73547567	+
Merged-chr1-73689541-2	chr1	73689440	73689643	+
Merged-chr1-73927518-2	chr1	73927384	73927653	+
Merged-chr1-74157997-2	chr1	74157846	74158149	+
Merged-chr1-74226389-2	chr1	74226289	74226489	+
Merged-chr1-74554525-2	chr1	74554407	74554643	+
Merged-chr1-74629364-2	chr1	74629228	74629501	+
Merged-chr1-74634738-2	chr1	74634590	74634887	+
Merged-chr1-74871639-2	chr1	74871535	74871743	+
Merged-chr1-75410413-2	chr1	75410310	75410517	+
Merged-chr1-75422555-2	chr1	75422423	75422688	+
Merged-chr1-75794452-2	chr1	75794323	75794581	+
Merged-chr1-75801205-2	chr1	75801096	75801314	+
Merged-chr1-75993969-2	chr1	75993822	75994116	+
Merged-chr1-76000144-2	chr1	75999975	76000314	+
Merged-chr1-76025824-2	chr1	76025689	76025960	+
Merged-chr1-76585741-2	chr1	76585544	76585939	+
Merged-chr1-76774001-2	chr1	76773818	76774185	+
Merged-chr1-77437222-2	chr1	77437061	77437384	+
Merged-chr1-77448290-2	chr1	77448190	77448391	+
Merged-chr1-77449519-2	chr1	77449370	77449669	+
Merged-chr1-77469386-2	chr1	77469274	77469498	+
Merged-chr3-83570232-2	chr3	83570131	83570333	+
Merged-chr3-83591220-2	chr3	83591114	83591326	+
Merged-chr3-83675960-2	chr3	83675762	83676159	+
Merged-chr3-83676964-2	chr3	83676862	83677067	+
Merged-chr3-83747847-2	chr3	83747744	83747951	+
Merged-chr3-83784279-2	chr3	83784171	83784387	+
Merged-chr3-83798507-2	chr3	83798385	83798630	+
Merged-chr3-84010665-2	chr3	84010517	84010813	+
Merged-chr3-84178042-2	chr3	84177916	84178169	+
Merged-chr3-84381509-2	chr3	84381403	84381616	+
Merged-chr3-86481769-2	chr3	86481630	86481908	+
Merged-chr3-86496895-2	chr3	86496736	86497054	+
Merged-chr3-86649082-2	chr3	86648931	86649234	+
Merged-chr3-86754747-2	chr3	86754617	86754877	+
Merged-chr3-86998800-2	chr3	86998686	86998915	+
Merged-chr3-87283366-2	chr3	87283257	87283476	+
Merged-chr3-87435665-2	chr3	87435471	87435860	+
Merged-chr3-87542608-2	chr3	87542482	87542735	+
Merged-chr3-87778391-2	chr3	87778239	87778544	+
Merged-chr3-87869585-2	chr3	87869462	87869708	+
Merged-chr3-87942442-2	chr3	87942302	87942582	+
Merged-chr3-88024974-2	chr3	88024855	88025094	+
Merged-chr3-88080937-2	chr3	88080837	88081038	+
Merged-chr3-88085602-2	chr3	88085478	88085726	+
Merged-chr3-88174029-2	chr3	88173913	88174146	+
Merged-chr3-88326145-2	chr3	88326010	88326280	+
Merged-chr3-88335636-2	chr3	88335512	88335760	+
Merged-chr3-88376041-2	chr3	88375898	88376184	+
Merged-chr3-88379567-2	chr3	88379434	88379700	+
Merged-chr3-88450513-2	chr3	88450381	88450645	+
Merged-chr3-88697144-2	chr3	88697010	88697278	+
Merged-chr3-88701938-2	chr3	88701836	88702040	+
Merged-chr3-89030030-2	chr3	89029860	89030200	+
Merged-chr3-90279950-2	chr3	90279831	90280069	+
Merged-chr3-91085925-2	chr3	91085805	91086045	+
Merged-chr3-91768034-2	chr3	91767901	91768167	+
Merged-chr3-92094091-2	chr3	92093974	92094209	+
Merged-chr3-92498761-2	chr3	92498606	92498917	+
Merged-chr3-92620048-2	chr3	92619926	92620171	+
Merged-chr3-93216009-2	chr3	93215894	93216124	+
Merged-chr3-93513055-2	chr3	93512934	93513177	+
Merged-chr3-93663737-2	chr3	93663635	93663839	+
Merged-chr3-94111101-2	chr3	94110949	94111253	+
Merged-chr3-94113988-2	chr3	94113817	94114159	+
Merged-chr3-94642391-2	chr3	94642260	94642522	+
Merged-chr3-94914917-2	chr3	94914767	94915067	+
Merged-chr3-95021672-2	chr3	95021569	95021775	+
Merged-chr3-95034674-2	chr3	95034568	95034780	+
Merged-chr3-95036984-2	chr3	95036808	95037160	+
Merged-chr3-95147949-2	chr3	95147846	95148052	+
Merged-chr3-95467777-2	chr3	95467650	95467905	+
Merged-chr3-95907972-2	chr3	95907843	95908101	+
Merged-chr3-96147776-2	chr3	96147653	96147899	+
Merged-chr3-96163937-2	chr3	96163803	96164071	+
Merged-chr3-96178052-2	chr3	96177925	96178180	+
Merged-chr3-96181537-2	chr3	96181428	96181647	+
Merged-chr3-96264009-2	chr3	96263895	96264123	+
Merged-chr3-96290334-2	chr3	96290168	96290501	+
Merged-chr3-96292857-2	chr3	96292691	96293023	+
Merged-chr3-96381131-2	chr3	96380994	96381269	+
Merged-chr3-96394410-2	chr3	96394236	96394584	+
Merged-chr3-96538077-2	chr3	96537951	96538203	+
Merged-chr3-96941714-2	chr3	96941599	96941829	+
Merged-chr3-96963522-2	chr3	96963404	96963641	+
Merged-chr3-97344226-2	chr3	97344078	97344374	+
Merged-chr3-98269900-2	chr3	98269742	98270058	+
Merged-chr3-98323376-2	chr3	98323240	98323513	+
Merged-chr3-98376848-2	chr3	98376730	98376967	+
Merged-chr3-99025343-2	chr3	99025213	99025474	+
Merged-chr3-99993810-2	chr3	99993657	99993964	+
Merged-chr3-100224737-2	chr3	100224588	100224887	+
Merged-chr3-100896362-2	chr3	100896254	100896470	+
Merged-chr3-100967597-2	chr3	100967452	100967743	+
Merged-chr3-101404621-2	chr3	101404489	101404754	+
Merged-chr3-101519091-2	chr3	101518987	101519196	+
Merged-chr3-101700939-2	chr3	101700744	101701134	+
Merged-chr3-101887961-2	chr3	101887811	101888112	+
Merged-chr3-101994863-2	chr3	101994730	101994996	+
Merged-chr3-102409404-2	chr3	102409287	102409522	+
Merged-chr11-84511314-2	chr11	84511179	84511450	+
Merged-chr11-84526443-2	chr11	84526323	84526563	+
Merged-chr11-84660374-2	chr11	84660262	84660487	+
Merged-chr11-84733064-2	chr11	84732948	84733181	+
Merged-chr11-85053768-2	chr11	85053654	85053882	+
Merged-chr11-85061839-2	chr11	85061666	85062013	+
Merged-chr11-85254972-2	chr11	85254854	85255090	+
Merged-chr11-85528198-2	chr11	85528055	85528342	+
Merged-chr11-86451442-2	chr11	86451332	86451552	+
Merged-chr11-86514848-2	chr11	86514740	86514957	+
Merged-chr11-86571155-2	chr11	86571038	86571273	+
Merged-chr11-87236472-2	chr11	87236329	87236616	+
Merged-chr11-87240370-2	chr11	87240248	87240493	+
Merged-chr11-87256904-2	chr11	87256725	87257084	+
Merged-chr11-87276032-2	chr11	87275838	87276226	+
Merged-chr11-87284878-2	chr11	87284709	87285048	+
Merged-chr11-87841286-2	chr11	87841125	87841448	+
Merged-chr11-87984246-2	chr11	87984140	87984353	+
Merged-chr11-88015786-2	chr11	88015654	88015919	+
Merged-chr11-88348003-2	chr11	88347877	88348130	+
Merged-chr11-88380855-2	chr11	88380749	88380961	+
Merged-chr11-88532513-2	chr11	88532392	88532634	+
Merged-chr11-88793203-2	chr11	88793098	88793309	+
Merged-chr11-88907606-2	chr11	88907485	88907727	+
Merged-chr11-88929343-2	chr11	88929158	88929529	+
Merged-chr11-89103662-2	chr11	89103500	89103824	+
Merged-chr11-89412457-2	chr11	89412356	89412558	+
Merged-chr11-89440666-2	chr11	89440505	89440827	+
Merged-chr11-89481625-2	chr11	89481519	89481732	+
Merged-chr11-89518037-2	chr11	89517922	89518153	+
Merged-chr11-89880737-2	chr11	89880618	89880856	+
Merged-chr11-90369507-2	chr11	90369404	90369611	+
Merged-chr11-91997222-2	chr11	91997077	91997367	+
Merged-chr11-93829669-2	chr11	93829524	93829815	+
Merged-chr11-93905406-2	chr11	93905273	93905540	+
Merged-chr11-94041305-2	chr11	94041169	94041441	+
Merged-chr11-95017186-2	chr11	95017077	95017295	+
Merged-chr11-95418625-2	chr11	95418512	95418738	+
Merged-chr11-95629706-2	chr11	95629592	95629820	+
Merged-chr11-95842373-2	chr11	95842247	95842500	+
Merged-chr11-95913533-2	chr11	95913408	95913658	+
Merged-chr11-96558927-2	chr11	96558810	96559045	+
Merged-chr11-96641658-2	chr11	96641546	96641770	+
Merged-chr1-77493609-2	chr1	77493420	77493798	+
Merged-chr1-77501564-2	chr1	77501444	77501685	+
Merged-chr1-77626637-2	chr1	77626519	77626755	+
Merged-chr1-78116638-2	chr1	78116524	78116753	+
Merged-chr1-78654343-2	chr1	78654228	78654458	+
Merged-chr1-80147415-2	chr1	80147307	80147523	+
Merged-chr1-80234206-2	chr1	80234101	80234312	+
Merged-chr1-81979731-2	chr1	81979592	81979871	+
Merged-chr11-96684080-2	chr11	96683956	96684204	+
Merged-chr11-97085054-2	chr11	97084920	97085189	+
Merged-chr11-97175676-2	chr11	97175547	97175806	+
Merged-chr11-97216020-2	chr11	97215880	97216160	+
Merged-chr11-97468616-2	chr11	97468512	97468720	+
Merged-chr11-97496979-2	chr11	97496842	97497117	+
Merged-chr11-97745552-2	chr11	97745401	97745704	+
Merged-chr11-97794930-2	chr11	97794762	97795099	+
Merged-chr1-82945324-2	chr1	82945210	82945439	+
Merged-chr1-83035043-2	chr1	83034938	83035148	+
Merged-chr1-83841215-2	chr1	83841104	83841327	+
Merged-chr1-84173820-2	chr1	84173707	84173934	+
Merged-chr1-84402313-2	chr1	84402213	84402414	+
Merged-chr11-97849570-2	chr11	97849445	97849696	+
Merged-chr11-97933926-2	chr11	97933802	97934050	+
Merged-chr11-98118431-2	chr11	98118315	98118548	+
Merged-chr11-98514507-2	chr11	98514347	98514668	+
Merged-chr11-98543883-2	chr11	98543755	98544012	+
Merged-chr11-98603371-2	chr11	98603232	98603510	+
Merged-chr1-88084606-2	chr1	88084505	88084708	+
Merged-chr1-88098117-2	chr1	88097993	88098241	+
Merged-chr1-88206032-2	chr1	88205922	88206142	+
Merged-chr1-88207708-2	chr1	88207518	88207899	+
Merged-chr1-88216534-2	chr1	88216410	88216659	+
Merged-chr1-88368065-2	chr1	88367904	88368226	+
Merged-chr1-88384053-2	chr1	88383871	88384235	+
Merged-chr1-88483654-2	chr1	88483539	88483770	+
Merged-chr1-88648765-2	chr1	88648655	88648876	+
Merged-chr11-99230862-2	chr11	99230739	99230985	+
Merged-chr11-99799348-2	chr11	99799229	99799468	+
Merged-chr11-100154334-2	chr11	100154216	100154452	+
Merged-chr11-100237472-2	chr11	100237340	100237604	+
Merged-chr11-100395987-2	chr11	100395839	100396135	+
Merged-chr11-100406584-2	chr11	100406467	100406702	+
Merged-chr11-100564007-2	chr11	100563863	100564151	+
Merged-chr11-100670787-2	chr11	100670686	100670889	+
Merged-chr11-100801047-2	chr11	100800947	100801148	+
Merged-chr1-89062126-2	chr1	89062017	89062236	+
Merged-chr1-89123145-2	chr1	89123038	89123253	+
Merged-chr1-89210580-2	chr1	89210427	89210734	+
Merged-chr1-90175794-2	chr1	90175674	90175915	+
Merged-chr1-90469444-2	chr1	90469335	90469554	+
Merged-chr11-101095668-2	chr11	101095543	101095793	+
Merged-chr11-101169309-2	chr11	101169175	101169443	+
Merged-chr11-101243291-2	chr11	101243123	101243460	+
Merged-chr11-101297426-2	chr11	101297295	101297558	+
Merged-chr11-101410036-2	chr11	101409908	101410165	+
Merged-chr11-101414043-2	chr11	101413936	101414151	+
Merged-chr11-101466374-2	chr11	101466181	101466567	+
Merged-chr11-101488788-2	chr11	101488650	101488926	+
Merged-chr1-90565649-2	chr1	90565508	90565790	+
Merged-chr1-90860845-2	chr1	90860739	90860952	+
Merged-chr1-90900542-2	chr1	90900413	90900672	+
Merged-chr1-90995013-2	chr1	90994907	90995119	+
Merged-chr1-91773144-2	chr1	91773017	91773271	+
Merged-chr1-92011464-2	chr1	92011349	92011580	+
Merged-chr1-92424756-2	chr1	92424649	92424863	+
Merged-chr1-92519962-2	chr1	92519856	92520069	+
Merged-chr1-92525048-2	chr1	92524937	92525159	+
Merged-chr1-94328874-2	chr1	94328741	94329008	+
Merged-chr1-94489314-2	chr1	94489172	94489457	+
Merged-chr1-95094392-2	chr1	95094269	95094515	+
Merged-chr1-95780577-2	chr1	95780464	95780690	+
Merged-chr1-95785155-2	chr1	95785005	95785305	+
Merged-chr1-95847897-2	chr1	95847785	95848010	+
Merged-chr1-95852207-2	chr1	95852054	95852360	+
Merged-chr1-95853564-2	chr1	95853422	95853707	+
Merged-chr1-96890155-2	chr1	96890041	96890270	+
Merged-chr1-96930688-2	chr1	96930573	96930803	+
Merged-chr1-97624128-2	chr1	97623960	97624297	+
Merged-chr1-98643509-2	chr1	98643386	98643632	+
Merged-chr1-99969904-2	chr1	99969798	99970011	+
Merged-chr1-99983296-2	chr1	99983187	99983406	+
Merged-chr1-103893583-2	chr1	103893438	103893729	+
Merged-chr1-104160240-2	chr1	104160136	104160344	+
Merged-chr1-104928778-2	chr1	104928630	104928926	+
Merged-chr1-105637031-2	chr1	105636873	105637190	+
Merged-chr1-106884258-2	chr1	106884100	106884416	+
Merged-chr1-108068198-2	chr1	108068090	108068306	+
Merged-chr1-108461176-2	chr1	108461069	108461284	+
Merged-chr1-108995354-2	chr1	108995252	108995457	+
Merged-chr1-110443461-2	chr1	110443353	110443569	+
Merged-chr1-110445452-2	chr1	110445315	110445590	+
Merged-chr1-110881759-2	chr1	110881646	110881873	+
Merged-chr1-111029819-2	chr1	111029685	111029954	+
Merged-chr8-35548485-2	chr8	35548381	35548590	+
Merged-chr8-35568371-2	chr8	35568263	35568480	+
Merged-chr8-35681272-2	chr8	35681171	35681373	+
Merged-chr8-35790978-2	chr8	35790834	35791123	+
Merged-chr8-35795978-2	chr8	35795829	35796127	+
Merged-chr8-36332211-2	chr8	36332101	36332322	+
Merged-chr8-37602566-2	chr8	37602432	37602700	+
Merged-chr8-37954123-2	chr8	37954002	37954245	+
Merged-chr8-38561808-2	chr8	38561700	38561917	+
Merged-chr8-40414839-2	chr8	40414682	40414996	+
Merged-chr8-42024529-2	chr8	42024398	42024661	+
Merged-chr8-44042367-2	chr8	44042167	44042567	+
Merged-chr8-44265702-2	chr8	44265587	44265817	+
Merged-chr8-44392505-2	chr8	44392385	44392625	+
Merged-chr8-44439199-2	chr8	44439095	44439304	+
Merged-chr8-45654872-2	chr8	45654767	45654978	+
Merged-chr8-46064780-2	chr8	46064672	46064889	+
Merged-chr8-46331972-2	chr8	46331830	46332115	+
Merged-chr8-48574816-2	chr8	48574716	48574916	+
Merged-chr8-49006349-2	chr8	49006218	49006480	+
Merged-chr8-49264674-2	chr8	49264564	49264785	+
Merged-chr8-49837510-2	chr8	49837410	49837610	+
Merged-chr8-51379082-2	chr8	51378982	51379183	+
Merged-chr8-51849568-2	chr8	51849439	51849698	+
Merged-chr8-52217202-2	chr8	52217086	52217319	+
Merged-chr8-52267103-2	chr8	52266987	52267219	+
Merged-chr8-53441901-2	chr8	53441746	53442056	+
Merged-chr8-55161782-2	chr8	55161653	55161911	+
Merged-chr8-56197646-2	chr8	56197533	56197760	+
Merged-chr8-58007421-2	chr8	58007321	58007522	+
Merged-chr8-59288709-2	chr8	59288604	59288815	+
Merged-chr8-59882575-2	chr8	59882463	59882688	+
Merged-chr8-59889488-2	chr8	59889360	59889617	+
Merged-chr8-59968924-2	chr8	59968811	59969037	+
Merged-chr8-60095755-2	chr8	60095619	60095891	+
Merged-chr8-60211902-2	chr8	60211760	60212045	+
Merged-chr8-60239888-2	chr8	60239776	60240000	+
Merged-chr8-62824875-2	chr8	62824768	62824983	+
Merged-chr8-63164616-2	chr8	63164448	63164785	+
Merged-chr8-63722495-2	chr8	63722381	63722610	+
Merged-chr8-64219735-2	chr8	64219577	64219894	+
Merged-chr8-64557970-2	chr8	64557821	64558120	+
Merged-chr8-65497232-2	chr8	65497086	65497378	+
Merged-chr8-65648887-2	chr8	65648753	65649022	+
Merged-chr8-66408571-2	chr8	66408409	66408734	+
Merged-chr8-66878580-2	chr8	66878455	66878705	+
Merged-chr8-67453047-2	chr8	67452905	67453189	+
Merged-chr8-67586330-2	chr8	67586200	67586461	+
Merged-chr8-67588198-2	chr8	67588090	67588306	+
Merged-chr8-67732915-2	chr8	67732775	67733055	+
Merged-chr8-68340036-2	chr8	68339898	68340174	+
Merged-chr8-68996458-2	chr8	68996343	68996574	+
Merged-chr8-69010479-2	chr8	69010377	69010581	+
Merged-chr8-69012671-2	chr8	69012568	69012775	+
Merged-chr8-69156005-2	chr8	69155867	69156143	+
Merged-chr8-69389183-2	chr8	69389058	69389308	+
Merged-chr8-69610367-2	chr8	69610222	69610513	+
Merged-chr8-70519219-2	chr8	70519097	70519341	+
Merged-chr8-70944579-2	chr8	70944442	70944716	+
Merged-chr8-71645860-2	chr8	71645731	71645990	+
Merged-chr8-71740924-2	chr8	71740792	71741057	+
Merged-chr8-71794802-2	chr8	71794681	71794924	+
Merged-chr3-102521785-2	chr3	102521675	102521896	+
Merged-chr3-102890093-2	chr3	102889975	102890211	+
Merged-chr3-102931313-2	chr3	102931177	102931450	+
Merged-chr3-103344997-2	chr3	103344828	103345166	+
Merged-chr3-104398745-2	chr3	104398569	104398921	+
Merged-chr3-105230818-2	chr3	105230682	105230955	+
Merged-chr3-105253715-2	chr3	105253591	105253840	+
Merged-chr17-71250166-2	chr17	71250047	71250286	+
Merged-chr17-71947379-2	chr17	71947276	71947483	+
Merged-chr17-73231409-2	chr17	73231289	73231530	+
Merged-chr17-74229112-2	chr17	74228998	74229226	+
Merged-chr17-75956618-2	chr17	75956515	75956722	+
Merged-chr17-76437713-2	chr17	76437577	76437849	+
Merged-chr3-106864640-2	chr3	106864536	106864745	+
Merged-chr3-107799175-2	chr3	107799044	107799306	+
Merged-chr3-108188546-2	chr3	108188437	108188655	+
Merged-chr3-108236608-2	chr3	108236497	108236719	+
Merged-chr17-76511286-2	chr17	76511173	76511400	+
Merged-chr17-76899590-2	chr17	76899451	76899729	+
Merged-chr17-76912373-2	chr17	76912221	76912525	+
Merged-chr17-76967405-2	chr17	76967227	76967584	+
Merged-chr17-78875291-2	chr17	78875172	78875411	+
Merged-chr17-79035099-2	chr17	79034937	79035261	+
Merged-chr17-79285117-2	chr17	79284997	79285237	+
Merged-chr3-108456001-2	chr3	108455888	108456115	+
Merged-chr3-111174398-2	chr3	111174223	111174574	+
Merged-chr3-112042792-2	chr3	112042650	112042935	+
Merged-chr3-112755045-2	chr3	112754852	112755238	+
Merged-chr3-112992576-2	chr3	112992389	112992764	+
Merged-chr3-114567614-2	chr3	114567509	114567720	+
Merged-chr3-116378920-2	chr3	116378792	116379049	+
Merged-chr17-79742482-2	chr17	79742303	79742662	+
Merged-chr17-80053700-2	chr17	80053599	80053801	+
Merged-chr17-80550889-2	chr17	80550761	80551018	+
Merged-chr17-80579565-2	chr17	80579428	80579702	+
Merged-chr17-80661390-2	chr17	80661259	80661522	+
Merged-chr17-80974091-2	chr17	80973970	80974212	+
Merged-chr17-81035332-2	chr17	81035218	81035446	+
Merged-chr3-116426366-2	chr3	116426241	116426491	+
Merged-chr3-118798309-2	chr3	118798168	118798450	+
Merged-chr3-119647200-2	chr3	119647050	119647350	+
Merged-chr3-121171245-2	chr3	121171140	121171351	+
Merged-chr3-121233624-2	chr3	121233482	121233766	+
Merged-chr3-121241998-2	chr3	121241811	121242185	+
Merged-chr3-121444458-2	chr3	121444304	121444612	+
Merged-chr3-121497339-2	chr3	121497235	121497444	+
Merged-chr3-121848432-2	chr3	121848243	121848621	+
Merged-chr17-81185052-2	chr17	81184856	81185248	+
Merged-chr17-81253914-2	chr17	81253759	81254070	+
Merged-chr17-81631663-2	chr17	81631469	81631857	+
Merged-chr17-82367874-2	chr17	82367728	82368021	+
Merged-chr17-82599551-2	chr17	82599434	82599669	+
Merged-chr3-122137177-2	chr3	122137039	122137316	+
Merged-chr3-122967698-2	chr3	122967571	122967826	+
Merged-chr3-122999333-2	chr3	122999230	122999437	+
Merged-chr3-124309207-2	chr3	124309086	124309329	+
Merged-chr3-126619672-2	chr3	126619563	126619781	+
Merged-chr3-127166893-2	chr3	127166764	127167023	+
Merged-chr17-82673513-2	chr17	82673391	82673635	+
Merged-chr17-82705865-2	chr17	82705753	82705977	+
Merged-chr17-82731003-2	chr17	82730882	82731124	+
Merged-chr17-82840176-2	chr17	82840053	82840300	+
Merged-chr17-83535770-2	chr17	83535648	83535892	+
Merged-chr17-83566024-2	chr17	83565917	83566132	+
Merged-chr17-83869085-2	chr17	83868942	83869228	+
Merged-chr17-83922087-2	chr17	83921966	83922209	+
Merged-chr17-83978524-2	chr17	83978361	83978687	+
Merged-chr3-127233366-2	chr3	127233244	127233489	+
Merged-chr3-127627831-2	chr3	127627694	127627968	+
Merged-chr3-129232450-2	chr3	129232320	129232581	+
Merged-chr3-129254915-2	chr3	129254784	129255046	+
Merged-chr3-129276785-2	chr3	129276658	129276912	+
Merged-chr3-129773844-2	chr3	129773730	129773958	+
Merged-chr3-129883695-2	chr3	129883587	129883803	+
Merged-chr17-84013264-2	chr17	84013144	84013385	+
Merged-chr17-84064286-2	chr17	84064137	84064435	+
Merged-chr17-84128507-2	chr17	84128378	84128636	+
Merged-chr17-84353992-2	chr17	84353842	84354143	+
Merged-chr17-84411294-2	chr17	84411179	84411409	+
Merged-chr17-84426738-2	chr17	84426628	84426848	+
Merged-chr17-84750842-2	chr17	84750736	84750948	+
Merged-chr17-85113205-2	chr17	85113096	85113314	+
Merged-chr17-85157935-2	chr17	85157827	85158043	+
Merged-chr3-130621699-2	chr3	130621578	130621821	+
Merged-chr3-131184361-2	chr3	131184246	131184476	+
Merged-chr3-131207833-2	chr3	131207638	131208028	+
Merged-chr3-131290710-2	chr3	131290586	131290835	+
Merged-chr3-132479213-2	chr3	132479107	132479319	+
Merged-chr3-132852100-2	chr3	132851988	132852212	+
Merged-chr3-133187799-2	chr3	133187671	133187927	+
Merged-chr17-85282773-2	chr17	85282668	85282878	+
Merged-chr17-86024407-2	chr17	86024256	86024559	+
Merged-chr17-86198690-2	chr17	86198570	86198810	+
Merged-chr17-87150924-2	chr17	87150815	87151034	+
Merged-chr17-87423615-2	chr17	87423493	87423737	+
Merged-chr17-87871221-2	chr17	87871058	87871384	+
Merged-chr3-135294194-2	chr3	135294052	135294337	+
Merged-chr3-135778881-2	chr3	135778721	135779042	+
Merged-chr3-137400558-2	chr3	137400455	137400662	+
Merged-chr17-87958023-2	chr17	87957889	87958158	+
Merged-chr17-88038877-2	chr17	88038747	88039007	+
Merged-chr17-88063786-2	chr17	88063661	88063912	+
Merged-chr17-88077166-2	chr17	88076992	88077340	+
Merged-chr17-88660377-2	chr17	88660267	88660488	+
Merged-chr17-88733442-2	chr17	88733299	88733585	+
Merged-chr17-88746404-2	chr17	88746292	88746517	+
Merged-chr3-137443182-2	chr3	137443067	137443297	+
Merged-chr3-137704968-2	chr3	137704859	137705078	+
Merged-chr3-137801201-2	chr3	137801101	137801302	+
Merged-chr3-138339080-2	chr3	138338938	138339223	+
Merged-chr3-138355481-2	chr3	138355372	138355590	+
Merged-chr3-138439576-2	chr3	138439447	138439705	+
Merged-chr3-138653901-2	chr3	138653771	138654031	+
Merged-chr3-138838302-2	chr3	138838201	138838404	+
Merged-chr17-88842680-2	chr17	88842572	88842788	+
Merged-chr17-89212586-2	chr17	89212427	89212746	+
Merged-chr17-89328847-2	chr17	89328738	89328957	+
Merged-chr17-90671081-2	chr17	90670965	90671198	+
Merged-chr17-90789928-2	chr17	90789826	90790031	+
Merged-chr17-91242732-2	chr17	91242586	91242878	+
Merged-chr17-91394959-2	chr17	91394855	91395064	+
Merged-chr3-139783595-2	chr3	139783456	139783734	+
Merged-chr3-141512330-2	chr3	141512214	141512447	+
Merged-chr3-142011966-2	chr3	142011846	142012086	+
Merged-chr3-142313395-2	chr3	142313256	142313534	+
Merged-chr3-142550079-2	chr3	142549970	142550189	+
Merged-chr3-142821637-2	chr3	142821467	142821808	+
Merged-chr3-143995443-2	chr3	143995327	143995559	+
Merged-chr17-91831545-2	chr17	91831431	91831660	+
Merged-chr17-92694413-2	chr17	92694303	92694524	+
Merged-chr17-94194837-2	chr17	94194674	94195001	+
Merged-chr17-94702124-2	chr17	94701925	94702323	+
Merged-chr17-95086925-2	chr17	95086823	95087028	+
Merged-chr17_random-437332-2	chr17_random	437192	437473	+
Merged-chr18-3039509-2	chr18	3039380	3039639	+
Merged-chr18-3131189-2	chr18	3131071	3131307	+
Merged-chr11-101503327-2	chr11	101503148	101503506	+
Merged-chr11-101507099-2	chr11	101506958	101507240	+
Merged-chr11-101543493-2	chr11	101543376	101543611	+
Merged-chr11-101649074-2	chr11	101648878	101649271	+
Merged-chr11-101830371-2	chr11	101830231	101830512	+
Merged-chr11-102191116-2	chr11	102191015	102191218	+
Merged-chr11-102201985-2	chr11	102201875	102202096	+
Merged-chr11-102401180-2	chr11	102401064	102401297	+
Merged-chr11-102955418-2	chr11	102955263	102955573	+
Merged-chr11-103305278-2	chr11	103305141	103305416	+
Merged-chr11-104462211-2	chr11	104462109	104462314	+
Merged-chr11-104839515-2	chr11	104839387	104839643	+
Merged-chr11-105311028-2	chr11	105310890	105311167	+
Merged-chr11-105540096-2	chr11	105539978	105540214	+
Merged-chr11-105882133-2	chr11	105882010	105882256	+
Merged-chr11-106078028-2	chr11	106077905	106078151	+
Merged-chr11-106565889-2	chr11	106565774	106566005	+
Merged-chr11-106585901-2	chr11	106585782	106586020	+
Merged-chr11-107214339-2	chr11	107214219	107214459	+
Merged-chr11-107278205-2	chr11	107278104	107278307	+
Merged-chr11-107372475-2	chr11	107372337	107372613	+
Merged-chr11-107844721-2	chr11	107844594	107844848	+
Merged-chr11-108686922-2	chr11	108686759	108687086	+
Merged-chr11-108873203-2	chr11	108873037	108873369	+
Merged-chr11-109213074-2	chr11	109212970	109213179	+
Merged-chr11-109337671-2	chr11	109337536	109337807	+
Merged-chr11-109881474-2	chr11	109881341	109881608	+
Merged-chr11-110643220-2	chr11	110643093	110643348	+
Merged-chr11-110904811-2	chr11	110904682	110904940	+
Merged-chr11-112363354-2	chr11	112363248	112363461	+
Merged-chr11-112672593-2	chr11	112672481	112672705	+
Merged-chr11-112701842-2	chr11	112701729	112701955	+
Merged-chr11-112803109-2	chr11	112802963	112803256	+
Merged-chr11-112821080-2	chr11	112820952	112821208	+
Merged-chr11-112982099-2	chr11	112981989	112982209	+
Merged-chr11-114441494-2	chr11	114441362	114441626	+
Merged-chr11-115112247-2	chr11	115112137	115112358	+
Merged-chr11-115317042-2	chr11	115316928	115317157	+
Merged-chr11-116143492-2	chr11	116143381	116143603	+
Merged-chr1-111224951-2	chr1	111224755	111225147	+
Merged-chr1-112226329-2	chr1	112226224	112226435	+
Merged-chr1-113589730-2	chr1	113589624	113589836	+
Merged-chr1-114122284-2	chr1	114122171	114122397	+
Merged-chr1-114167730-2	chr1	114167605	114167856	+
Merged-chr1-114336902-2	chr1	114336741	114337063	+
Merged-chr11-116205644-2	chr11	116205533	116205756	+
Merged-chr11-116349886-2	chr11	116349714	116350059	+
Merged-chr11-116434549-2	chr11	116434435	116434664	+
Merged-chr11-116764045-2	chr11	116763912	116764178	+
Merged-chr11-116801995-2	chr11	116801889	116802102	+
Merged-chr11-116832323-2	chr11	116832219	116832427	+
Merged-chr11-116861691-2	chr11	116861591	116861792	+
Merged-chr11-117008629-2	chr11	117008517	117008741	+
Merged-chr11-117202791-2	chr11	117202691	117202891	+
Merged-chr11-117275431-2	chr11	117275296	117275567	+
Merged-chr1-115861163-2	chr1	115861006	115861320	+
Merged-chr1-116538438-2	chr1	116538304	116538572	+
Merged-chr1-119355916-2	chr1	119355812	119356021	+
Merged-chr1-119605168-2	chr1	119604999	119605337	+
Merged-chr1-120485259-2	chr1	120485146	120485373	+
Merged-chr11-117361753-2	chr11	117361649	117361858	+
Merged-chr11-117526664-2	chr11	117526558	117526771	+
Merged-chr11-117857619-2	chr11	117857505	117857734	+
Merged-chr11-118169546-2	chr11	118169442	118169651	+
Merged-chr11-118413224-2	chr11	118413108	118413341	+
Merged-chr11-118909683-2	chr11	118909530	118909836	+
Merged-chr11-119256875-2	chr11	119256729	119257022	+
Merged-chr1-120544695-2	chr1	120544534	120544856	+
Merged-chr1-120673298-2	chr1	120673183	120673414	+
Merged-chr1-120945800-2	chr1	120945694	120945907	+
Merged-chr1-120972787-2	chr1	120972685	120972890	+
Merged-chr1-121054039-2	chr1	121053882	121054197	+
Merged-chr1-121285408-2	chr1	121285271	121285546	+
Merged-chr1-121350534-2	chr1	121350432	121350636	+
Merged-chr1-121394316-2	chr1	121394216	121394417	+
Merged-chr1-121478144-2	chr1	121478008	121478280	+
Merged-chr11-119433898-2	chr11	119433743	119434053	+
Merged-chr11-119446053-2	chr11	119445953	119446153	+
Merged-chr11-119464259-2	chr11	119464155	119464364	+
Merged-chr11-119506569-2	chr11	119506425	119506713	+
Merged-chr11-119557930-2	chr11	119557775	119558086	+
Merged-chr11-119766441-2	chr11	119766318	119766565	+
Merged-chr11-120029408-2	chr11	120029277	120029539	+
Merged-chr11-120092867-2	chr11	120092764	120092971	+
Merged-chr11-120109035-2	chr11	120108929	120109142	+
Merged-chr1-121531579-2	chr1	121531442	121531717	+
Merged-chr1-122251134-2	chr1	122251030	122251238	+
Merged-chr1-122297817-2	chr1	122297665	122297969	+
Merged-chr1-122471930-2	chr1	122471821	122472039	+
Merged-chr1-122625724-2	chr1	122625607	122625841	+
Merged-chr1-122983864-2	chr1	122983698	122984031	+
Merged-chr1-123315930-2	chr1	123315825	123316035	+
Merged-chr1-123739488-2	chr1	123739378	123739599	+
Merged-chr11-121007341-2	chr11	121007201	121007481	+
Merged-chr12-3127807-2	chr12	3127655	3127960	+
Merged-chr12-3236243-2	chr12	3236143	3236344	+
Merged-chr12-3238541-2	chr12	3238412	3238671	+
Merged-chr12-3337245-2	chr12	3337130	3337360	+
Merged-chr12-3524517-2	chr12	3524412	3524622	+
Merged-chr12-3606326-2	chr12	3606180	3606472	+
Merged-chr1-124504096-2	chr1	124503962	124504231	+
Merged-chr1-127332474-2	chr1	127332360	127332589	+
Merged-chr1-128025904-2	chr1	128025786	128026022	+
Merged-chr1-129793236-2	chr1	129793044	129793428	+
Merged-chr1-130241072-2	chr1	130240933	130241212	+
Merged-chr1-130289162-2	chr1	130289051	130289273	+
Merged-chr1-130987609-2	chr1	130987434	130987785	+
Merged-chr1-132143252-2	chr1	132143132	132143373	+
Merged-chr1-132148187-2	chr1	132148052	132148322	+
Merged-chr1-133662317-2	chr1	133662189	133662446	+
Merged-chr1-133763681-2	chr1	133763564	133763798	+
Merged-chr1-134097660-2	chr1	134097544	134097776	+
Merged-chr1-134118999-2	chr1	134118891	134119108	+
Merged-chr1-134134460-2	chr1	134134354	134134567	+
Merged-chr1-134185011-2	chr1	134184900	134185123	+
Merged-chr1-134367887-2	chr1	134367689	134368086	+
Merged-chr1-134373591-2	chr1	134373486	134373696	+
Merged-chr1-134616808-2	chr1	134616677	134616940	+
Merged-chr1-134747553-2	chr1	134747422	134747684	+
Merged-chr1-134775780-2	chr1	134775675	134775885	+
Merged-chr1-134916031-2	chr1	134915902	134916160	+
Merged-chr1-135105807-2	chr1	135105698	135105917	+
Merged-chr1-135294312-2	chr1	135294178	135294447	+
Merged-chr1-135564491-2	chr1	135564324	135564659	+
Merged-chr1-135591225-2	chr1	135591092	135591358	+
Merged-chr1-135752796-2	chr1	135752681	135752912	+
Merged-chr1-136389055-2	chr1	136388950	136389161	+
Merged-chr1-136397680-2	chr1	136397543	136397818	+
Merged-chr1-136415412-2	chr1	136415273	136415552	+
Merged-chr1-136431913-2	chr1	136431731	136432095	+
Merged-chr1-136470390-2	chr1	136470250	136470530	+
Merged-chr1-137240725-2	chr1	137240617	137240833	+
Merged-chr1-137265067-2	chr1	137264943	137265191	+
Merged-chr1-137528966-2	chr1	137528848	137529085	+
Merged-chr1-137573755-2	chr1	137573602	137573908	+
Merged-chr1-138324278-2	chr1	138324133	138324423	+
Merged-chr1-138452777-2	chr1	138452630	138452924	+
Merged-chr1-138509933-2	chr1	138509821	138510046	+
Merged-chr1-138543057-2	chr1	138542948	138543166	+
Merged-chr1-138571417-2	chr1	138571220	138571614	+
Merged-chr1-138624576-2	chr1	138624462	138624690	+
Merged-chr1-138678503-2	chr1	138678363	138678643	+
Merged-chr1-138776410-2	chr1	138776297	138776523	+
Merged-chr1-138837328-2	chr1	138837144	138837513	+
Merged-chr1-139174006-2	chr1	139173868	139174145	+
Merged-chr1-139275319-2	chr1	139275176	139275463	+
Merged-chr1-139284313-2	chr1	139284199	139284428	+
Merged-chr1-140500754-2	chr1	140500643	140500865	+
Merged-chr8-72178246-2	chr8	72178127	72178365	+
Merged-chr8-73180352-2	chr8	73180215	73180490	+
Merged-chr8-73222768-2	chr8	73222660	73222876	+
Merged-chr8-73293426-2	chr8	73293286	73293566	+
Merged-chr8-74018953-2	chr8	74018846	74019061	+
Merged-chr8-74050331-2	chr8	74050202	74050460	+
Merged-chr8-74115503-2	chr8	74115382	74115625	+
Merged-chr8-74233848-2	chr8	74233737	74233960	+
Merged-chr8-74249766-2	chr8	74249653	74249879	+
Merged-chr8-74650031-2	chr8	74649930	74650132	+
Merged-chr8-74797847-2	chr8	74797736	74797958	+
Merged-chr8-74835181-2	chr8	74835065	74835298	+
Merged-chr8-74840207-2	chr8	74840066	74840348	+
Merged-chr8-75201033-2	chr8	75200886	75201180	+
Merged-chr8-75612335-2	chr8	75612225	75612446	+
Merged-chr8-75860938-2	chr8	75860836	75861041	+
Merged-chr8-76405662-2	chr8	76405535	76405790	+
Merged-chr8-77550153-2	chr8	77549982	77550324	+
Merged-chr8-77718942-2	chr8	77718827	77719057	+
Merged-chr8-77977833-2	chr8	77977723	77977944	+
Merged-chr8-78279707-2	chr8	78279604	78279811	+
Merged-chr8-79387146-2	chr8	79387030	79387263	+
Merged-chr8-79825382-2	chr8	79825274	79825490	+
Merged-chr8-80542504-2	chr8	80542387	80542622	+
Merged-chr8-80638612-2	chr8	80638503	80638721	+
Merged-chr8-80670971-2	chr8	80670871	80671071	+
Merged-chr8-80808993-2	chr8	80808866	80809121	+
Merged-chr8-81038882-2	chr8	81038724	81039040	+
Merged-chr8-81061941-2	chr8	81061833	81062049	+
Merged-chr8-81080949-2	chr8	81080839	81081060	+
Merged-chr8-81102087-2	chr8	81101972	81102202	+
Merged-chr8-81108113-2	chr8	81107943	81108284	+
Merged-chr8-81112383-2	chr8	81112260	81112506	+
Merged-chr8-81436567-2	chr8	81436418	81436717	+
Merged-chr8-81438561-2	chr8	81438432	81438691	+
Merged-chr8-82328542-2	chr8	82328441	82328643	+
Merged-chr8-82414649-2	chr8	82414527	82414772	+
Merged-chr8-83058879-2	chr8	83058712	83059047	+
Merged-chr8-83088565-2	chr8	83088452	83088678	+
Merged-chr8-83435505-2	chr8	83435345	83435665	+
Merged-chr8-84051825-2	chr8	84051717	84051933	+
Merged-chr8-84417412-2	chr8	84417271	84417553	+
Merged-chr8-85299943-2	chr8	85299836	85300050	+
Merged-chr8-85507030-2	chr8	85506925	85507135	+
Merged-chr8-85560921-2	chr8	85560808	85561035	+
Merged-chr8-85689130-2	chr8	85689022	85689238	+
Merged-chr8-85901368-2	chr8	85901263	85901473	+
Merged-chr8-86129290-2	chr8	86129134	86129446	+
Merged-chr8-86172096-2	chr8	86171989	86172204	+
Merged-chr8-86280657-2	chr8	86280546	86280768	+
Merged-chr8-86710645-2	chr8	86710527	86710764	+
Merged-chr8-86821478-2	chr8	86821311	86821646	+
Merged-chr8-87155840-2	chr8	87155728	87155952	+
Merged-chr8-87174374-2	chr8	87174220	87174529	+
Merged-chr8-87545731-2	chr8	87545577	87545886	+
Merged-chr8-87668010-2	chr8	87667908	87668113	+
Merged-chr8-87965806-2	chr8	87965682	87965931	+
Merged-chr8-87997062-2	chr8	87996948	87997177	+
Merged-chr8-88022613-2	chr8	88022448	88022778	+
Merged-chr8-88211224-2	chr8	88211112	88211337	+
Merged-chr8-89299493-2	chr8	89299333	89299653	+
Merged-chr8-90390731-2	chr8	90390593	90390870	+
Merged-chr8-90730079-2	chr8	90729936	90730223	+
Merged-chr8-91152025-2	chr8	91151911	91152139	+
Merged-chr8-91415342-2	chr8	91415229	91415455	+
Merged-chr8-91469837-2	chr8	91469719	91469956	+
Merged-chr8-91527685-2	chr8	91527535	91527835	+
Merged-chr8-91577071-2	chr8	91576924	91577219	+
Merged-chr3-144076119-2	chr3	144075986	144076252	+
Merged-chr3-144282383-2	chr3	144282277	144282490	+
Merged-chr3-144680991-2	chr3	144680876	144681106	+
Merged-chr3-145106423-2	chr3	145106323	145106524	+
Merged-chr3-145314586-2	chr3	145314469	145314703	+
Merged-chr3-145536489-2	chr3	145536374	145536605	+
Merged-chr3-145587911-2	chr3	145587809	145588013	+
Merged-chr18-3350581-2	chr18	3350421	3350741	+
Merged-chr18-4012938-2	chr18	4012808	4013069	+
Merged-chr18-4281784-2	chr18	4281683	4281886	+
Merged-chr18-4404277-2	chr18	4404173	4404381	+
Merged-chr18-4581863-2	chr18	4581706	4582021	+
Merged-chr3-146043083-2	chr3	146042964	146043203	+
Merged-chr3-146132449-2	chr3	146132336	146132562	+
Merged-chr3-146198124-2	chr3	146198014	146198234	+
Merged-chr3-146356642-2	chr3	146356511	146356774	+
Merged-chr3-147590444-2	chr3	147590307	147590582	+
Merged-chr3-147626861-2	chr3	147626755	147626968	+
Merged-chr3-147785963-2	chr3	147785830	147786096	+
Merged-chr3-148649463-2	chr3	148649353	148649573	+
Merged-chr3-148715695-2	chr3	148715563	148715827	+
Merged-chr18-5012017-2	chr18	5011907	5012128	+
Merged-chr18-5111420-2	chr18	5111314	5111527	+
Merged-chr18-5112862-2	chr18	5112755	5112969	+
Merged-chr18-5163404-2	chr18	5163297	5163512	+
Merged-chr18-6262783-2	chr18	6262668	6262898	+
Merged-chr3-148882916-2	chr3	148882767	148883065	+
Merged-chr3-149069030-2	chr3	149068896	149069164	+
Merged-chr3-149147465-2	chr3	149147339	149147592	+
Merged-chr3-153339013-2	chr3	153338905	153339121	+
Merged-chr3-153469482-2	chr3	153469382	153469583	+
Merged-chr3-153603738-2	chr3	153603592	153603885	+
Merged-chr18-7652712-2	chr18	7652606	7652818	+
Merged-chr18-7690854-2	chr18	7690748	7690960	+
Merged-chr18-7719725-2	chr18	7719602	7719848	+
[truncated: 4,403 more rows]
