# Supplementary material for: Aurkb/PP1-mediated resetting of Oct4 during the cell cycle determines the identity of embryonic stem cells
Source: eLife. 2016 Feb 15;5:e10877. doi: 10.7554/eLife.10877 (PMC4798952; doi:10.7554/eLife.10877)
Supplement: Figure 6—source data 2. — DOI: http://dx.doi.org/10.7554/eLife.10877.017 [file elife-10877-fig6-data2.xlsx]

## Sheet: Sheet1
PeakID	Chr	Start	End	Strand	Annotation	Detailed Annotation	Distance to TSS	Nearest PromoterID	Entrez ID	Nearest Unigene	Nearest Refseq	Nearest Ensembl	Gene Name	Gene Alias	Gene Description	Gene Type
MACS_peak_10	chr1	3903996	3904564	+	Intergenic	Intergenic	-242701	NM_001011874	497097	Mm.454496	NM_001011874	ENSMUSG00000051951	Xkr4	AY534250|Gm210|XRG4|mKIAA1889	X Kell blood group precursor related family member 4	protein-coding
MACS_peak_10002	chr17	27193454	27193908	+	promoter-TSS (NM_080553)	promoter-TSS (NM_080553)	-568	NM_080553	16440	Mm.458106	NM_080553	ENSMUSG00000042644	Itpr3	Ip3r3|Itpr-3	inositol 1,4,5-triphosphate receptor 3	protein-coding
MACS_peak_1001	chr1	109874483	109875336	+	Intergenic	Intergenic	61073	NR_102307	319596	Mm.136054	NR_102306		D830032E09Rik	-	RIKEN cDNA D830032E09 gene	ncRNA
MACS_peak_10013	chr17	27715138	27715584	+	TTS (NM_019837)	TTS (NM_019837)	-12689	NM_001002895	106672	Mm.61488	NM_001002895		AI413582	AI854251	expressed sequence AI413582	protein-coding
MACS_peak_10018	chr17	27758375	27759139	+	intron (NM_019837, intron 1 of 4)	intron (NM_019837, intron 1 of 4)	1152	NM_001291046	56409	Mm.144699	NM_019837	ENSMUSG00000024213	Nudt3	1110011B09Rik|AA960325|Dipp|Dipp1	nudix (nucleotide diphosphate linked moiety X)-type motif 3	protein-coding
MACS_peak_10019	chr17	27775545	27776169	+	Intergenic	Intergenic	-3670	NM_025963	67097	Mm.275810	NM_025963	ENSMUSG00000052146	Rps10	2210402A09Rik	ribosomal protein S10	protein-coding
MACS_peak_1002	chr1	110287544	110288018	+	Intergenic	Intergenic	473945	NR_102307	319596	Mm.136054	NR_102306		D830032E09Rik	-	RIKEN cDNA D830032E09 gene	ncRNA
MACS_peak_10024	chr17	27964410	27965093	+	Intergenic	Lx9|LINE|L1	-7264	NM_001271511	224647	Mm.196577	NM_001033279	ENSMUSG00000056692	D17Wsu92e	AU020189|C030010A15|C80239	DNA segment, Chr 17, Wayne State University 92, expressed	protein-coding
MACS_peak_10027	chr17	28229194	28229575	+	Intergenic	B3A|SINE|B2	-11800	NM_001085555	21463	Mm.29758	NM_013687	ENSMUSG00000062859	Tcp11	D17Ken1|Tcp-11	t-complex protein 11	protein-coding
MACS_peak_10031	chr17	28350177	28350685	+	intron (NM_027185, intron 1 of 10)	B3|SINE|B2	5708	NM_027185	23853	Mm.204731	NM_027185	ENSMUSG00000002257	Def6	2410003F05Rik|6430538D02Rik|AV094905|Ibp|Slat|Slat2|Slat6	differentially expressed in FDCP 6	protein-coding
MACS_peak_10032	chr17	28367356	28367773	+	Intergenic	Intergenic	-2135	NM_011145	19015	Mm.328914	NM_011145	ENSMUSG00000002250	Ppard	NUC-1|NUC1|Nr1c2|PPAR-beta|PPAR-delta|PPAR[b]|PPARdelta|Pparb|Pparb/d	peroxisome proliferator activator receptor delta	protein-coding
MACS_peak_10033	chr17	28369144	28369766	+	promoter-TSS (NM_011145)	promoter-TSS (NM_011145)	-244	NM_011145	19015	Mm.328914	NM_011145	ENSMUSG00000002250	Ppard	NUC-1|NUC1|Nr1c2|PPAR-beta|PPAR-delta|PPAR[b]|PPARdelta|Pparb|Pparb/d	peroxisome proliferator activator receptor delta	protein-coding
MACS_peak_10036	chr17	28461204	28461760	+	intron (NR_028297, intron 9 of 9)	(TC)n|Simple_repeat|Simple_repeat	-3934	NM_011287	19896	Mm.336955	NM_011287	ENSMUSG00000037805	Rpl10a	CsA-19|Nedd6	ribosomal protein L10A	protein-coding
MACS_peak_10038	chr17	28466617	28467338	+	intron (NM_011287, intron 4 of 5)	intron (NM_011287, intron 4 of 5)	1561	NM_011287	19896	Mm.336955	NM_011287	ENSMUSG00000037805	Rpl10a	CsA-19|Nedd6	ribosomal protein L10A	protein-coding
MACS_peak_1004	chr1	110331961	110332368	+	Intergenic	Lx6|LINE|L1	518328	NR_102307	319596	Mm.136054	NR_102306		D830032E09Rik	-	RIKEN cDNA D830032E09 gene	ncRNA
MACS_peak_10041	chr17	28641889	28642348	+	Intergenic	ID_B1|SINE|B4	-19024	NM_010220	14229	Mm.276405	NM_010220	ENSMUSG00000024222	Fkbp5	D17Ertd592e|Dit1|FKBP-5|FKBP51	FK506 binding protein 5	protein-coding
MACS_peak_10046	chr17	28783030	28783583	+	intron (NM_001290320, intron 16 of 19)	PB1D7|SINE|Alu	-23907	NM_016795	20815	Mm.15252	NM_016795		Srpk1	AU017960	serine/arginine-rich protein specific kinase 1	protein-coding
MACS_peak_1005	chr1	110443058	110443880	+	Intergenic	LTRIS2|LTR|ERV1	629633	NR_102307	319596	Mm.136054	NR_102306		D830032E09Rik	-	RIKEN cDNA D830032E09 gene	ncRNA
MACS_peak_10051	chr17	29002420	29003002	+	intron (NM_001034885, intron 1 of 9)	RLTR11A2|LTR|ERVK	7355	NM_001034885	433091	Mm.328925	NM_001034885	ENSMUSG00000043286	Pnpla1	-	patatin-like phospholipase domain containing 1	protein-coding
MACS_peak_10053	chr17	29096768	29097305	+	intron (NM_025888, intron 2 of 7)	ID_B1|SINE|B4	6875	NM_025888	66989	Mm.435	NM_025888	ENSMUSG00000005936	Kctd20	2410004N11Rik|AI451943|AW541186|D17Ertd562e	potassium channel tetramerisation domain containing 20	protein-coding
MACS_peak_10054	chr17	29117966	29118558	+	intron (NM_134115, intron 7 of 13)	intron (NM_134115, intron 7 of 13)	26620	NM_134115	106504	Mm.439986	NM_134115	ENSMUSG00000024006	Stk38	5830476G13Rik|9530097A09Rik|AA617404|Ndr1	serine/threonine kinase 38	protein-coding
MACS_peak_10055	chr17	29144730	29145681	+	promoter-TSS (NM_134115)	promoter-TSS (NM_134115)	-323	NM_134115	106504	Mm.439986	NM_134115	ENSMUSG00000024006	Stk38	5830476G13Rik|9530097A09Rik|AA617404|Ndr1	serine/threonine kinase 38	protein-coding
MACS_peak_10056	chr17	29171646	29172314	+	intron (NM_013663, intron 1 of 5)	RSINE1|SINE|B4	2375	NR_036613	20383	Mm.6787	NM_013663	ENSMUSG00000071172	Srsf3	AL024116|Sfrs3|X16	serine/arginine-rich splicing factor 3	protein-coding
MACS_peak_10058	chr17	29193476	29194029	+	TTS (NR_036469)	TTS (NR_036469)	22319	NR_036469	100504267	Mm.438550	NR_036469	ENSMUSG00000085912	Trp53cor1	Gm16197|OTTMUSG00000031656|linc-p21|lincRNA-p21	tumor protein p53 pathway corepressor 1	ncRNA
MACS_peak_10059	chr17	29194522	29195018	+	non-coding (NR_036469, exon 2 of 2)	non-coding (NR_036469, exon 2 of 2)	21301	NR_036469	100504267	Mm.438550	NR_036469	ENSMUSG00000085912	Trp53cor1	Gm16197|OTTMUSG00000031656|linc-p21|lincRNA-p21	tumor protein p53 pathway corepressor 1	ncRNA
MACS_peak_1006	chr1	110445112	110445869	+	Intergenic	RLTR13D6|LTR|ERVK	631654	NR_102307	319596	Mm.136054	NR_102306		D830032E09Rik	-	RIKEN cDNA D830032E09 gene	ncRNA
MACS_peak_10060	chr17	29197651	29198069	+	intron (NR_036469, intron 1 of 1)	intron (NR_036469, intron 1 of 1)	18211	NR_036469	100504267	Mm.438550	NR_036469	ENSMUSG00000085912	Trp53cor1	Gm16197|OTTMUSG00000031656|linc-p21|lincRNA-p21	tumor protein p53 pathway corepressor 1	ncRNA
MACS_peak_10061	chr17	29215180	29216008	+	intron (NR_036469, intron 1 of 1)	ID_B1|SINE|B4	477	NR_036469	100504267	Mm.438550	NR_036469	ENSMUSG00000085912	Trp53cor1	Gm16197|OTTMUSG00000031656|linc-p21|lincRNA-p21	tumor protein p53 pathway corepressor 1	ncRNA
MACS_peak_10062	chr17	29217753	29218290	+	Intergenic	Intergenic	-1950	NR_036469	100504267	Mm.438550	NR_036469	ENSMUSG00000085912	Trp53cor1	Gm16197|OTTMUSG00000031656|linc-p21|lincRNA-p21	tumor protein p53 pathway corepressor 1	ncRNA
MACS_peak_10063	chr17	29237763	29238372	+	TTS (NM_007669)	TTS (NM_007669)	7350	NM_007669	12575	Mm.195663	NM_007669	ENSMUSG00000023067	Cdkn1a	CAP20|CDKI|CIP1|Cdkn1|P21|SDI1|Waf1|mda6|p21Cip1|p21WAF	cyclin-dependent kinase inhibitor 1A (P21)	protein-coding
MACS_peak_10065	chr17	29330594	29331336	+	intron (NM_153166, intron 8 of 20)	intron (NM_153166, intron 8 of 20)	43770	NM_153166	240058	Mm.39905	NM_153166	ENSMUSG00000024008	Cpne5	A830083G22Rik	copine V	protein-coding
MACS_peak_10069	chr17	29518643	29519027	+	Intergenic	B2_Mm2|SINE|B2	20976	NM_001159538	26382	Mm.279187	NM_013710	ENSMUSG00000024013	Fgd2	Tcd-2|Tcd2|ZFYVE4|tcs-2|tcs2	FYVE, RhoGEF and PH domain containing 2	protein-coding
MACS_peak_1007	chr1	110703757	110704261	+	Intergenic	LTRIS2|LTR|ERV1	890173	NR_102307	319596	Mm.136054	NR_102306		D830032E09Rik	-	RIKEN cDNA D830032E09 gene	ncRNA
MACS_peak_10072	chr17	29587865	29588733	+	Intergenic	Intergenic	-39691	NM_008842	18712	Mm.405293	NM_008842		Pim1	Pim-1	proviral integration site 1	protein-coding
MACS_peak_10075	chr17	29751246	29751935	+	promoter-TSS (NM_021419)	promoter-TSS (NM_021419)	-186	NM_021419	58230	Mm.305994	NM_021419	ENSMUSG00000090083	Rnf8	3830404E21Rik|AIP37	ring finger protein 8	protein-coding
MACS_peak_10078	chr17	29910413	29910766	+	Intergenic	Intergenic	-56627	NM_001163741	68597	Mm.390979	NM_026782	ENSMUSG00000024018	Ccdc167	1110021J02Rik	coiled-coil domain containing 167	protein-coding
MACS_peak_10089	chr17	30669761	30670618	+	intron (NM_172618, intron 1 of 11)	intron (NM_172618, intron 1 of 11)	43043	NM_172618	224671	Mm.41220	NM_027060	ENSMUSG00000062202	Btbd9	1700023F20Rik|4930402L05|AI464421	BTB (POZ) domain containing 9	protein-coding
MACS_peak_10091	chr17	30720383	30720969	+	Intergenic	RLTR11A|LTR|ERVK	-7444	NM_027060	224671	Mm.41220	NM_027060	ENSMUSG00000062202	Btbd9	1700023F20Rik|4930402L05|AI464421	BTB (POZ) domain containing 9	protein-coding
MACS_peak_10092	chr17	30735241	30735809	+	intron (NM_025374, intron 3 of 5)	RLTR9D|LTR|ERVK	14079	NM_025374	109801	Mm.261984	NM_025374	ENSMUSG00000024026	Glo1	0610009E22Rik|1110008E19Rik|2510049H23Rik|AW550643|GLY1|Glo-1|Glo-1r|Glo-1s|Glo1-r|Glo1-s|Qglo	glyoxalase 1	protein-coding
MACS_peak_10094	chr17	30749521	30750487	+	promoter-TSS (NM_001113560)	promoter-TSS (NM_001113560)	-400	NM_001113560	109801	Mm.261984	NM_025374	ENSMUSG00000024026	Glo1	0610009E22Rik|1110008E19Rik|2510049H23Rik|AW550643|GLY1|Glo-1|Glo-1r|Glo-1s|Glo1-r|Glo1-s|Qglo	glyoxalase 1	protein-coding
MACS_peak_10099	chr17	30801236	30802132	+	intron (NM_013811, intron 13 of 92)	intron (NM_013811, intron 13 of 92)	37803	NM_013811	13417	Mm.426017	NM_013811	ENSMUSG00000033826	Dnah8	ATPase|Dnahc8|Hst6.7b|P1-Loop	dynein, axonemal, heavy chain 8	protein-coding
MACS_peak_101	chr1	10868108	10868794	+	Intergenic	RMER16|LTR|ERVK	-115095	NM_029525	109294	Mm.123247	NM_029525	ENSMUSG00000048960	Prex2	6230420N16Rik|AI316880|AI553603|C030045D06Rik|D430013K02|Depdc2|P-Rex2	phosphatidylinositol-3,4,5-trisphosphate-dependent Rac exchange factor 2	protein-coding
MACS_peak_1010	chr1	110881511	110881981	+	Intergenic	Lx4A|LINE|L1	-998568	NM_172853	241201	Mm.213407	NM_172853	ENSMUSG00000026312	Cdh7	9330156F07Rik|CDH7L1	cadherin 7, type 2	protein-coding
MACS_peak_10102	chr17	31250366	31250877	+	intron (NM_009593, intron 14 of 14)	intron (NM_009593, intron 14 of 14)	15935	NM_011575	21786	Mm.4641	NM_011575	ENSMUSG00000024029	Tff3	ITF|mITF	trefoil factor 3, intestinal	protein-coding
MACS_peak_10103	chr17	31419024	31419521	+	Intergenic	B2_Mm2|SINE|B2	-4971	NM_025290	22092	Mm.12743	NM_025290	ENSMUSG00000024033	Rsph1	MCA|Tsga2	radial spoke head 1 homolog (Chlamydomonas)	protein-coding
MACS_peak_10106	chr17	31463551	31464097	+	intron (NM_001242427, intron 9 of 19)	L1M4|LINE|L1	30655	NM_001242427	224674	Mm.311395	NM_153062	ENSMUSG00000024036	Slc37a1	G3PP	solute carrier family 37 (glycerol-3-phosphate transporter), member 1	protein-coding
MACS_peak_10107	chr17	31562579	31563267	+	intron (NM_008804, intron 4 of 18)	MIRb|SINE|MIR	39744	NM_001163748	18585	Mm.10812	NM_008804	ENSMUSG00000041119	Pde9a	PDE9A1	phosphodiesterase 9A	protein-coding
MACS_peak_10108	chr17	31565435	31566068	+	intron (NM_008804, intron 4 of 18)	B1_Mus2|SINE|Alu	42572	NM_001163748	18585	Mm.10812	NM_008804	ENSMUSG00000041119	Pde9a	PDE9A1	phosphodiesterase 9A	protein-coding
MACS_peak_10109	chr17	31566437	31566846	+	intron (NM_008804, intron 4 of 18)	intron (NM_008804, intron 4 of 18)	43462	NM_001163748	18585	Mm.10812	NM_008804	ENSMUSG00000041119	Pde9a	PDE9A1	phosphodiesterase 9A	protein-coding
MACS_peak_10111	chr17	31589547	31590211	+	intron (NM_008804, intron 7 of 18)	ID_B1|SINE|B4	59553	NM_021322	57773	Mm.143771	NM_021322	ENSMUSG00000024037	Wdr4	AI415180|AI448349|D530049K22Rik	WD repeat domain 4	protein-coding
MACS_peak_10112	chr17	31599471	31599954	+	intron (NM_008804, intron 13 of 18)	MLT1C|LTR|MaLR	49720	NM_021322	57773	Mm.143771	NM_021322	ENSMUSG00000024037	Wdr4	AI415180|AI448349|D530049K22Rik	WD repeat domain 4	protein-coding
MACS_peak_10115	chr17	31647830	31648855	+	intron (NM_021322, intron 1 of 10)	intron (NM_021322, intron 1 of 10)	1090	NM_021322	57773	Mm.143771	NM_021322	ENSMUSG00000024037	Wdr4	AI415180|AI448349|D530049K22Rik	WD repeat domain 4	protein-coding
MACS_peak_10119	chr17	31725663	31726238	+	intron (NR_027493, intron 4 of 11)	L1MB2|LINE|L1	24232	NM_016670	18771	Mm.259295	NM_016670	ENSMUSG00000006705	Pknox1	D17Wsu76e|PREP1	Pbx/knotted 1 homeobox	protein-coding
MACS_peak_10120	chr17	31902007	31902458	+	Intergenic	L1Md_F2|LINE|L1	87356	NM_001278570	12954	Mm.1228	NM_013501	ENSMUSG00000024041	Cryaa	Acry-1|Crya-1|Crya1|DAcry-1|lop18	crystallin, alpha A	protein-coding
MACS_peak_10121	chr17	31939325	31940176	+	Intergenic	Intergenic	52987	NM_010831	17691	Mm.290941	NM_010831	ENSMUSG00000024042	Sik1	Msk|Sik|Snf1lk	salt inducible kinase 1	protein-coding
MACS_peak_10122	chr17	31942906	31943640	+	Intergenic	Intergenic	49464	NM_010831	17691	Mm.290941	NM_010831	ENSMUSG00000024042	Sik1	Msk|Sik|Snf1lk	salt inducible kinase 1	protein-coding
MACS_peak_10123	chr17	31944663	31946012	+	Intergenic	Intergenic	47400	NM_010831	17691	Mm.290941	NM_010831	ENSMUSG00000024042	Sik1	Msk|Sik|Snf1lk	salt inducible kinase 1	protein-coding
MACS_peak_10125	chr17	31956038	31957007	+	Intergenic	Intergenic	36215	NM_010831	17691	Mm.290941	NM_010831	ENSMUSG00000024042	Sik1	Msk|Sik|Snf1lk	salt inducible kinase 1	protein-coding
MACS_peak_10126	chr17	31978178	31978630	+	Intergenic	Intergenic	14333	NM_010831	17691	Mm.290941	NM_010831	ENSMUSG00000024042	Sik1	Msk|Sik|Snf1lk	salt inducible kinase 1	protein-coding
MACS_peak_10127	chr17	31980750	31981135	+	TTS (NM_010831)	TTS (NM_010831)	11795	NM_010831	17691	Mm.290941	NM_010831	ENSMUSG00000024042	Sik1	Msk|Sik|Snf1lk	salt inducible kinase 1	protein-coding
MACS_peak_10131	chr17	32432548	32433619	+	Intergenic	RLTR11B|LTR|ERVK	-12005	NM_020508	57261	Mm.253518	NM_020508	ENSMUSG00000024002	Brd4	Brd5|HUNK1|MCAP|WI-11513	bromodomain containing 4	protein-coding
MACS_peak_10132	chr17	32439761	32440144	+	TTS (NM_019774)	TTS (NM_019774)	18146	NM_019774	56399	Mm.328945	NM_019774	ENSMUSG00000024045	Akap8	1200016A02Rik|AA673585|AKAP95|AU015639	A kinase (PRKA) anchor protein 8	protein-coding
MACS_peak_10136	chr17	32700079	32700754	+	Intergenic	ETnERV2-int|LTR|ERVK	26842	NM_024442	70101	Mm.30504	NM_024442	ENSMUSG00000048440	Cyp4f16	2310021J05Rik|AI746515	cytochrome P450, family 4, subfamily f, polypeptide 16	protein-coding
MACS_peak_10141	chr17	33170043	33170504	+	promoter-TSS (NM_028543)	promoter-TSS (NM_028543)	53	NM_028543	73451	Mm.129453	NM_028543	ENSMUSG00000067430	Zfp763	1700065O13Rik|AI839635	zinc finger protein 763	protein-coding
MACS_peak_10142	chr17	33195148	33195646	+	Intergenic	MTD|LTR|MaLR	9606	NM_001009544	74042	Mm.84774	NM_001009544	ENSMUSG00000023350	4921501E09Rik	PHF8	RIKEN cDNA 4921501E09 gene	protein-coding
MACS_peak_10144	chr17	33204764	33205125	+	promoter-TSS (NM_001009544)	promoter-TSS (NM_001009544)	59	NM_001009544	74042	Mm.84774	NM_001009544	ENSMUSG00000023350	4921501E09Rik	PHF8	RIKEN cDNA 4921501E09 gene	protein-coding
MACS_peak_10145	chr17	33437820	33438258	+	intron (NM_001142957, intron 3 of 3)	intron (NM_001142957, intron 3 of 3)	11550	NM_001142957	100043468	Mm.276296	NM_001142957		Zfp955b	A430003O12Rik|C430039G02Rik|C530035A18Rik|Gm4455|Zfp883b	zinc finger protein 955B	protein-coding
MACS_peak_10146	chr17	33736633	33737417	+	intron (NM_053214, intron 21 of 27)	intron (NM_053214, intron 21 of 27)	-29012	NR_034153	328801	Mm.181488	NM_026712	ENSMUSG00000073423	Zfp414	0610030H11Rik|Znf414	zinc finger protein 414	protein-coding
MACS_peak_10148	chr17	33956143	33956774	+	intron (NM_030697, intron 6 of 10)	intron (NM_030697, intron 6 of 10)	4985	NM_016844	54127	Mm.352374	NM_016844	ENSMUSG00000067288	Rps28	-	ribosomal protein S28	protein-coding
MACS_peak_10149	chr17	33961274	33961904	+	promoter-TSS (NM_016844)	promoter-TSS (NM_016844)	-1	NR_103514	66416	Mm.29513	NM_023202	ENSMUSG00000041881	Ndufa7	14.5kDa|2400007M02Rik|CI-B14.5a	NADH dehydrogenase (ubiquinone) 1 alpha subcomplex, 7 (B14.5a)	protein-coding
MACS_peak_1015	chr1	111224155	111225940	+	Intergenic	MMETn-int|LTR|ERVK	-655267	NM_172853	241201	Mm.213407	NM_172853	ENSMUSG00000026312	Cdh7	9330156F07Rik|CDH7L1	cadherin 7, type 2	protein-coding
MACS_peak_10153	chr17	34117322	34117835	+	promoter-TSS (NR_033305)	promoter-TSS (NR_033305)	-859	NR_033305	433100	Mm.380381	NM_001013793		AA388235	-	expressed sequence AA388235	ncRNA
MACS_peak_10156	chr17	34214403	34215178	+	Intergenic	Intergenic	-14534	NM_008206	15001	Mm.116	NM_008206	ENSMUSG00000024334	H2-Oa	H-2Oa	histocompatibility 2, O region alpha locus	protein-coding
MACS_peak_10157	chr17	34299034	34299762	+	Intergenic	Intergenic	9262	NM_010387	14999	Mm.460938	NM_010387	ENSMUSG00000079547	H2-DMb1	AI385589|H-2Mb1|H2-Mb1	histocompatibility 2, class II, locus Mb1	protein-coding
MACS_peak_10159	chr17	34447180	34447792	+	intron (NM_010382, intron 2 of 5)	LTRIS2|LTR|ERV1	4674	NM_010382	14969	Mm.22564	NM_010382		H2-Eb1	H-2Eb|H2Eb|Ia-4|Ia4	histocompatibility 2, class II antigen E beta	protein-coding
MACS_peak_10162	chr17	34692351	34692733	+	Intergenic	Intergenic	-8698	NM_010929	18132	Mm.173813	NM_010929	ENSMUSG00000015468	Notch4	Int-3|Int3|N4	notch 4	protein-coding
MACS_peak_10165	chr17	35079025	35079366	+	Intergenic	B2_Mm2|SINE|B2	8758	NR_028527	100217427		NR_028527	ENSMUSG00000093009	Snord52	MBII-297	small nucleolar RNA, C/D box 52	snoRNA
MACS_peak_10166	chr17	35086661	35087295	+	TTS (NR_028527)	TTS (NR_028527)	975	NR_028527	100217427		NR_028527	ENSMUSG00000093009	Snord52	MBII-297	small nucleolar RNA, C/D box 52	snoRNA
MACS_peak_10167	chr17	35089210	35090138	+	promoter-TSS (NR_027943)	promoter-TSS (NR_027943)	-258	NR_015536	68763	Mm.28895	NR_015536	ENSMUSG00000092203	1110038B12Rik	0610009C20Rik|0910001G04Rik	RIKEN cDNA 1110038B12 gene	ncRNA
MACS_peak_10170	chr17	35164272	35165011	+	TTS (NM_013600)	TTS (NM_013600)	320	NR_028258	78376	Mm.390966	NM_023893	ENSMUSG00000036185	Sapcd1	2810436B06Rik|G7d|Ng23	suppressor APC domain containing 1	protein-coding
MACS_peak_10171	chr17	35187939	35188422	+	intron (NM_033444, intron 1 of 5)	intron (NM_033444, intron 1 of 5)	992	NM_033444	114584	Mm.29524	NM_033444		Clic1	Clcp|G6	chloride intracellular channel 1	protein-coding
MACS_peak_10174	chr17	35301754	35303068	+	promoter-TSS (NM_020027)	promoter-TSS (NM_020027)	-589	NM_020027	53761	Mm.272462	NM_020027	ENSMUSG00000024393	Prrc2a	3110039B05Rik|Bat-2|Bat2|D17H6S51E|G2|Wbp12|mKIAA4178	proline-rich coiled-coil 2A	protein-coding
MACS_peak_10176	chr17	35391545	35392152	+	Intergenic	B3|SINE|B2	3614	NR_106169	102465886		NR_106169		Mir8094	mmu-mir-8094	microRNA mir-8094	ncRNA
MACS_peak_10181	chr17	35639593	35640527	+	Intergenic	Intergenic	-2917	NM_013633	18999	Mm.17031	NM_013633	ENSMUSG00000024406	Pou5f1	NF-A3|Oct-3|Oct-3/4|Oct-4|Oct3|Oct3/4|Oct4|Otf-3|Otf-4|Otf3|Otf3-rs7|Otf3g|Otf4	POU domain, class 5, transcription factor 1	protein-coding
MACS_peak_10184	chr17	35653374	35653777	+	promoter-TSS (NM_146248)	promoter-TSS (NM_146248)	194	NM_001163764	106795	Mm.11434	NM_025674	ENSMUSG00000050410	Tcf19	5730403J10Rik|AW495861	transcription factor 19	protein-coding
MACS_peak_10187	chr17	35715145	35715539	+	Intergenic	Intergenic	10912	NM_175148	69542	Mm.265291	NM_175148	ENSMUSG00000039269	2300002M23Rik	Stg|emprin	RIKEN cDNA 2300002M23 gene	protein-coding
MACS_peak_10188	chr17	35727685	35728458	+	Intergenic	Intergenic	23641	NM_175148	69542	Mm.265291	NM_175148	ENSMUSG00000039269	2300002M23Rik	Stg|emprin	RIKEN cDNA 2300002M23 gene	protein-coding
MACS_peak_10189	chr17	35730395	35731163	+	Intergenic	(GGAAA)n|Simple_repeat|Simple_repeat	26349	NM_175148	69542	Mm.265291	NM_175148	ENSMUSG00000039269	2300002M23Rik	Stg|emprin	RIKEN cDNA 2300002M23 gene	protein-coding
MACS_peak_10191	chr17	35856883	35857405	+	Intergenic	B2_Mm2|SINE|B2	-16060	NM_172962	12305	Mm.5021	NM_007584	ENSMUSG00000003534	Ddr1	6030432F18|AI323681|CD167a|Cak|Nep|PTK3A	discoidin domain receptor family, member 1	protein-coding
MACS_peak_10195	chr17	36008125	36008668	+	intron (NM_001146710, intron 2 of 3)	B3|SINE|B2	4836	NM_175242	76448	Mm.359982	NM_175242	ENSMUSG00000034595	Ppp1r18	2310014H01Rik|AA407849|AI450394	protein phosphatase 1, regulatory subunit 18	protein-coding
MACS_peak_10196	chr17	36016417	36017015	+	promoter-TSS (NM_026987)	promoter-TSS (NM_026987)	-7	NM_026987	69192	Mm.390986	NM_026987	ENSMUSG00000024422	Dhx16	2410006N22Rik|DBP2|Ddx16|mKIAA0577	DEAH (Asp-Glu-Ala-His) box polypeptide 16	protein-coding
MACS_peak_10197	chr17	36029955	36030571	+	TTS (NM_026987)	TTS (NM_026987)	4060	NM_001033630	69662	Mm.260159	NM_001033630	ENSMUSG00000050705	2310061I04Rik	-	RIKEN cDNA 2310061I04 gene	protein-coding
MACS_peak_10199	chr17	36055338	36056341	+	TTS (NR_035445)	TTS (NR_035445)	1005	NR_035445	100316810		NR_035445	miRBase:MI0008326	Mir1894	Mirn1894|mmu-mir-1894	microRNA 1894	ncRNA
MACS_peak_10200	chr17	36075897	36076595	+	Intergenic	Intergenic	-7853	NR_028278	667766	Mm.29385	NR_028278		Gm8801	-	protein phosphatase 1, regulatory subunit 10 pseudogene	pseudo
MACS_peak_10204	chr17	36172228	36172827	+	intron (NR_015618, intron 1 of 1)	intron (NR_015618, intron 1 of 1)	-2881	NM_010398	15040	Mm.439648	NM_010398	ENSMUSG00000067212	H2-T23	37b|37c|H-2T23|H2-Qa1|Qa-1|Qa-1(b)|Qa1|Qed-1|T18c|T18c(37)|T23b|T23d	histocompatibility 2, T region locus 23	protein-coding
MACS_peak_1021	chr1	112555767	112556122	+	Intergenic	MMETn-int|LTR|ERVK	318005	NM_001081386	227485	Mm.322070	NM_001081386	ENSMUSG00000047216	Cdh19	-	cadherin 19, type 2	protein-coding
MACS_peak_10210	chr17	36815518	36815864	+	Intergenic	RLTR11A|LTR|ERVK	-6549	NM_177636	224756	Mm.246583	NM_177636	ENSMUSG00000037334	H2-M1	H-2M1|H2-Qa-Mb1|Mb1	histocompatibility 2, M region locus 1	protein-coding
MACS_peak_10211	chr17	37040568	37041070	+	intron (NM_146077, intron 3 of 7)	intron (NM_146077, intron 3 of 7)	5744	NM_146077	224762	Mm.213417	NM_146077	ENSMUSG00000058063	Trim31	BC026666|HCG1|HCGI|RNF	tripartite motif-containing 31	protein-coding
MACS_peak_10214	chr17	37125978	37126553	+	intron (NM_001115075, intron 1 of 5)	intron (NM_001115075, intron 1 of 5)	184	NM_001115075	240095	Mm.246609	NM_001115075	ENSMUSG00000024459	H2-M5	CRW2|D130003B22Rik|H-2M5	histocompatibility 2, M region locus 5	protein-coding
MACS_peak_10215	chr17	37132162	37132937	+	Intergenic	MTEa|LTR|MaLR	-5559	NM_001168502	22715	Mm.305561	NM_009559	ENSMUSG00000036036	Zfp57	G19|Zfp-57	zinc finger protein 57	protein-coding
MACS_peak_10216	chr17	37143715	37144281	+	intron (NM_001168502, intron 5 of 5)	B4|SINE|B4	3387	NR_033137	22715	Mm.305561	NM_009559	ENSMUSG00000036036	Zfp57	G19|Zfp-57	zinc finger protein 57	protein-coding
MACS_peak_10217	chr17	37164524	37165081	+	Intergenic	B2_Mm2|SINE|B2	-4459	NM_010814	17441	Mm.210857	NM_010814	ENSMUSG00000076439	Mog	B230317G11Rik	myelin oligodendrocyte glycoprotein	protein-coding
MACS_peak_10218	chr17	37200340	37200719	+	intron (NM_019439, intron 13 of 22)	intron (NM_019439, intron 13 of 22)	17618	NM_019439	54393	Mm.32191	NM_019439	ENSMUSG00000024462	Gabbr1	GABAB1|GABAbR1|bM573K1.1	gamma-aminobutyric acid (GABA) B receptor, 1	protein-coding
MACS_peak_10219	chr17	37215660	37216538	+	Intergenic	Intergenic	7082	NM_146477	258469	Mm.271392	NM_146477	ENSMUSG00000056600	Olfr90	MOR256-21|bM573K1.2	olfactory receptor 90	protein-coding
MACS_peak_10230	chr17	38127297	38128072	+	Intergenic	RLTR25B|LTR|ERVK	-37717	NM_001011829	258094	Mm.377348	NM_001011829	ENSMUSG00000071084	Olfr761	MOR218-12|MOR218-5P|MOR218-6P|Olfr1552-ps1	olfactory receptor 761	protein-coding
MACS_peak_10232	chr17	38153060	38153740	+	Intergenic	RLTR25B|LTR|ERVK	43329	NM_146327	258324	Mm.329044	NM_146327		Olfr129	MOR263-9	olfactory receptor 129	protein-coding
MACS_peak_10241	chr17	39200403	39201125	+	Intergenic	ETnERV2-int|LTR|ERVK	13218	NM_001177582	100126779	Mm.471589	NM_001177582	ENSMUSG00000096697	Esp23	Gm20581	exocrine gland secreted peptide 23	protein-coding
MACS_peak_10243	chr17	39244057	39244496	+	Intergenic	IAPLTR3-int|LTR|ERVK	-30294	NM_001177582	100126779	Mm.471589	NM_001177582	ENSMUSG00000096697	Esp23	Gm20581	exocrine gland secreted peptide 23	protein-coding
MACS_peak_10244	chr17	39266059	39266457	+	Intergenic	IAPLTR3-int|LTR|ERVK	-52276	NM_001177582	100126779	Mm.471589	NM_001177582	ENSMUSG00000096697	Esp23	Gm20581	exocrine gland secreted peptide 23	protein-coding
MACS_peak_1025	chr1	113156307	113157234	+	Intergenic	IAPEz-int|LTR|ERVK	-282821	NM_001081386	227485	Mm.322070	NM_001081386	ENSMUSG00000047216	Cdh19	-	cadherin 19, type 2	protein-coding
MACS_peak_10256	chr17	41030021	41030722	+	Intergenic	ORR1B1|LTR|MaLR	-12864	NM_027834	71583	Mm.158733	NM_027834	ENSMUSG00000054951	9130008F23Rik	-	RIKEN cDNA 9130008F23 gene	protein-coding
MACS_peak_10259	chr17	41327168	41327792	+	Intergenic	MMETn-int|LTR|ERVK	255846	NM_008650	17850	Mm.259884	NM_008650	ENSMUSG00000023921	Mut	D230010K02Rik|Mcm	methylmalonyl-Coenzyme A mutase	protein-coding
MACS_peak_1026	chr1	113507327	113507903	+	Intergenic	BGLII|LTR|ERVK	253880	NM_001081316	319901	Mm.103468	NM_001081316	ENSMUSG00000038702	Dsel	9330132E09Rik	dermatan sulfate epimerase-like	protein-coding
MACS_peak_10264	chr17	43010984	43011460	+	intron (NM_009847, intron 1 of 17)	B1_Mus1|SINE|Alu	2151	NM_009847	12488	Mm.218637	NM_009847	ENSMUSG00000061665	Cd2ap	AL024079|C78928|METS-1|Mets1	CD2-associated protein	protein-coding
MACS_peak_10265	chr17	43014039	43014459	+	promoter-TSS (NM_009847)	promoter-TSS (NM_009847)	-876	NM_009847	12488	Mm.218637	NM_009847	ENSMUSG00000061665	Cd2ap	AL024079|C78928|METS-1|Mets1	CD2-associated protein	protein-coding
MACS_peak_10266	chr17	43334006	43334649	+	Intergenic	RMER16-int|LTR|ERVK	-39087	NR_045153	545207	Mm.329050	NR_045153		E130008D07Rik	-	RIKEN cDNA E130008D07 gene	ncRNA
MACS_peak_1027	chr1	113543236	113543714	+	Intergenic	ORR1A2-int|LTR|MaLR	218020	NM_001081316	319901	Mm.103468	NM_001081316	ENSMUSG00000038702	Dsel	9330132E09Rik	dermatan sulfate epimerase-like	protein-coding
MACS_peak_10270	chr17	43695329	43696196	+	Intergenic	Intergenic	-9638	NM_013737	27226	Mm.9277	NM_013737	ENSMUSG00000023913	Pla2g7	R75400	phospholipase A2, group VII (platelet-activating factor acetylhydrolase, plasma)	protein-coding
MACS_peak_10271	chr17	43729112	43729872	+	intron (NM_013737, intron 2 of 11)	intron (NM_013737, intron 2 of 11)	-1034	NR_045444	73504	Mm.9277	NR_045444	ENSMUSG00000090307	1700071M16Rik	-	RIKEN cDNA 1700071M16 gene	ncRNA
MACS_peak_10277	chr17	45578508	45578911	+	Intergenic	MERVL_2A-int|LTR|ERVL	-8053	NM_152810	71702	Mm.28270	NM_152810	ENSMUSG00000023932	Cdc5l	1200002I02Rik|AA408004|PCDC5RP	cell division cycle 5-like (S. pombe)	protein-coding
MACS_peak_10279	chr17	45594294	45594920	+	intron (NM_027649, intron 3 of 7)	B3|SINE|B2	17280	NM_027649	71020	Mm.44257	NM_027649	ENSMUSG00000023935	Spats1	1700011H05Rik|4933400B06Rik|Daip2|Ddip|Srsp1	spermatogenesis associated, serine-rich 1	protein-coding
MACS_peak_10280	chr17	45666244	45666793	+	intron (NM_013688, intron 1 of 4)	intron (NM_013688, intron 1 of 4)	6135	NM_013688	21645	Mm.491193	NM_013688	ENSMUSG00000023949	Tcte1	D17Sil1|Tcte-1	t-complex-associated testis expressed 1	protein-coding
MACS_peak_10281	chr17	45685453	45685916	+	intron (NM_001013749, intron 1 of 2)	intron (NM_001013749, intron 1 of 2)	942	NM_001013749	210573	Mm.329064	NM_001013749	ENSMUSG00000096847	Tmem151b	Gm323	transmembrane protein 151B	protein-coding
MACS_peak_10284	chr17	45743911	45744648	+	Intergenic	MER34A|LTR|ERV1	-5228	NM_001177469	653016	Mm.45676	NM_001177468	ENSMUSG00000079471	Gm7325	EG653016|Esgp	predicted gene 7325	protein-coding
MACS_peak_10286	chr17	45868057	45868478	+	Intergenic	Intergenic	2526	NM_028164	72240	Mm.482897	NM_028164	ENSMUSG00000094690	1600014C23Rik	-	RIKEN cDNA 1600014C23 gene	protein-coding
MACS_peak_10287	chr17	45903815	45904348	+	Intergenic	Intergenic	-33288	NM_028164	72240	Mm.482897	NM_028164	ENSMUSG00000094690	1600014C23Rik	-	RIKEN cDNA 1600014C23 gene	protein-coding
MACS_peak_10291	chr17	46709871	46710497	+	intron (NM_175168, intron 15 of 19)	B2_Mm2|SINE|B2	-17073	NM_020493	20807	Mm.45044	NM_020493	ENSMUSG00000015605	Srf	AW049942|AW240594	serum response factor	protein-coding
MACS_peak_10292	chr17	46760758	46761320	+	intron (NM_175168, intron 1 of 19)	intron (NM_175168, intron 1 of 19)	5414	NM_175168	71461	Mm.181833	NM_175168	ENSMUSG00000023972	Ptk7	8430404F20Rik|chz|mPTK7/CCK4	PTK7 protein tyrosine kinase 7	protein-coding
MACS_peak_10296	chr17	46924579	46925627	+	Intergenic	RLTR13D1|LTR|ERVK	-5498	NM_025433	66229	Mm.218533	NM_025433	ENSMUSG00000063888	Rpl7l1	1500016H10Rik	ribosomal protein L7-like 1	protein-coding
MACS_peak_10297	chr17	46936607	46937267	+	3' UTR (NM_001100452, exon 11 of 11)	3' UTR (NM_001100452, exon 11 of 11)	-17332	NM_025433	66229	Mm.218533	NM_025433	ENSMUSG00000063888	Rpl7l1	1500016H10Rik	ribosomal protein L7-like 1	protein-coding
MACS_peak_10299	chr17	46948616	46949169	+	exon (NM_001100452, exon 6 of 11)	exon (NM_001100452, exon 6 of 11)	19470	NM_001100452	210982	Mm.37642	NM_001100452	ENSMUSG00000036568	Gltscr1l	mKIAA0240	GLTSCR1-like	protein-coding
MACS_peak_103	chr1	11072176	11072632	+	intron (NM_029525, intron 5 of 39)	RLTR15|LTR|ERVK	88858	NM_029525	109294	Mm.123247	NM_029525	ENSMUSG00000048960	Prex2	6230420N16Rik|AI316880|AI553603|C030045D06Rik|D430013K02|Depdc2|P-Rex2	phosphatidylinositol-3,4,5-trisphosphate-dependent Rac exchange factor 2	protein-coding
MACS_peak_10300	chr17	46949315	46949856	+	intron (NM_001100452, intron 5 of 10)	intron (NM_001100452, intron 5 of 10)	18777	NM_001100452	210982	Mm.37642	NM_001100452	ENSMUSG00000036568	Gltscr1l	mKIAA0240	GLTSCR1-like	protein-coding
MACS_peak_10303	chr17	46993720	46994139	+	Intergenic	CpG	-25567	NM_001100452	210982	Mm.37642	NM_001100452	ENSMUSG00000036568	Gltscr1l	mKIAA0240	GLTSCR1-like	protein-coding
MACS_peak_10304	chr17	47012591	47013061	+	Intergenic	B2_Mm2|SINE|B2	-14744	NM_178385	72726	Mm.33780	NM_178385	ENSMUSG00000036430	Tbcc	2810055C19Rik	tubulin-specific chaperone C	protein-coding
MACS_peak_10305	chr17	47063874	47064343	+	Intergenic	ID_B1|SINE|B4	16674	NM_008938	19133	Mm.291370	NM_008938	ENSMUSG00000023978	Prph2	AOFMD|AVMD|Nmf193|PRPH|RP7|Rd-2|Rd2|Rds|Tspan22|rds	peripherin 2	protein-coding
MACS_peak_10309	chr17	47404846	47405551	+	intron (NM_172622, intron 1 of 16)	L2c|LINE|L2	38019	NM_172622	224829	Mm.260989	NM_172622	ENSMUSG00000064043	Trerf1	9430096I18Rik|AI429294|B830015H24|RAPA|Trep-132|Trep132	transcriptional regulating factor 1	protein-coding
MACS_peak_10311	chr17	47486599	47487357	+	intron (NM_172622, intron 14 of 16)	intron (NM_172622, intron 14 of 16)	-18858	NM_001146212	64657	Mm.216250	NM_183086	ENSMUSG00000034729	Mrps10	1110038B19Rik|AW743084|Rpms10	mitochondrial ribosomal protein S10	protein-coding
MACS_peak_10313	chr17	47640456	47641119	+	Intergenic	B3|SINE|B2	-1213	NM_001081636	12445	Mm.27291	NM_007632	ENSMUSG00000034165	Ccnd3	9230106B05Rik|AA682053|AL024085|AW146355|C78795	cyclin D3	protein-coding
MACS_peak_10314	chr17	47644554	47645148	+	intron (NM_001081635, intron 1 of 6)	intron (NM_001081635, intron 1 of 6)	2851	NM_001081635	12445	Mm.27291	NM_007632	ENSMUSG00000034165	Ccnd3	9230106B05Rik|AA682053|AL024085|AW146355|C78795	cyclin D3	protein-coding
MACS_peak_10318	chr17	47702623	47703641	+	intron (NM_001081635, intron 1 of 6)	B1_Mus1|SINE|Alu	-27284	NM_007632	12445	Mm.27291	NM_007632	ENSMUSG00000034165	Ccnd3	9230106B05Rik|AA682053|AL024085|AW146355|C78795	cyclin D3	protein-coding
MACS_peak_10319	chr17	47705797	47706530	+	intron (NM_001081635, intron 1 of 6)	ID_B1|SINE|B4	-24253	NM_007632	12445	Mm.27291	NM_007632	ENSMUSG00000034165	Ccnd3	9230106B05Rik|AA682053|AL024085|AW146355|C78795	cyclin D3	protein-coding
MACS_peak_10322	chr17	47747850	47748380	+	promoter-TSS (NM_020048)	promoter-TSS (NM_020048)	326	NM_016859	53414	Mm.472101	NM_016859	ENSMUSG00000023988	Bysl	Bys|Enp1	bystin-like	protein-coding
MACS_peak_10330	chr17	48051478	48052288	+	intron (NM_001110824, intron 1 of 16)	intron (NM_001110824, intron 1 of 16)	9698	NM_028767	74123	Mm.240062	NM_028767	ENSMUSG00000023991	Foxp4	1200010K03Rik|2310007G05Rik|mFKHLA	forkhead box P4	protein-coding
MACS_peak_10338	chr17	48954455	48954841	+	Intergenic	ID_B1|SINE|B4	-117259	NM_027452	70530	Mm.133607	NM_027452	ENSMUSG00000040490	Lrfn2	5730420O05Rik|SALM1|mKIAA1246	leucine rich repeat and fibronectin type III domain containing 2	protein-coding
MACS_peak_10339	chr17	49139005	49139438	+	intron (NM_027452, intron 1 of 2)	intron (NM_027452, intron 1 of 2)	67314	NM_027452	70530	Mm.133607	NM_027452	ENSMUSG00000040490	Lrfn2	5730420O05Rik|SALM1|mKIAA1246	leucine rich repeat and fibronectin type III domain containing 2	protein-coding
MACS_peak_10340	chr17	49172923	49173524	+	intron (NM_027452, intron 1 of 2)	intron (NM_027452, intron 1 of 2)	79635	NR_038141	69311	Mm.46140	NR_038141		1700008K24Rik	-	RIKEN cDNA 1700008K24 gene	ncRNA
MACS_peak_10341	chr17	49174325	49174961	+	intron (NM_027452, intron 1 of 2)	intron (NM_027452, intron 1 of 2)	78215	NR_038141	69311	Mm.46140	NR_038141		1700008K24Rik	-	RIKEN cDNA 1700008K24 gene	ncRNA
MACS_peak_10342	chr17	49187032	49187851	+	intron (NM_027452, intron 1 of 2)	MLT1E1A|LTR|MaLR	65417	NR_038141	69311	Mm.46140	NR_038141		1700008K24Rik	-	RIKEN cDNA 1700008K24 gene	ncRNA
MACS_peak_10343	chr17	49213496	49213905	+	intron (NM_027452, intron 2 of 2)	ORR1C1|LTR|MaLR	39158	NR_038141	69311	Mm.46140	NR_038141		1700008K24Rik	-	RIKEN cDNA 1700008K24 gene	ncRNA
MACS_peak_10347	chr17	49920800	49921535	+	intron (NM_177052, intron 13 of 22)	LTRIS2|LTR|ERV1	166670	NM_177052	319991	Mm.441340	NM_177052	ENSMUSG00000023999	Kif6	D130004B10Rik|D130084M03Rik	kinesin family member 6	protein-coding
MACS_peak_10352	chr17	50555845	50556191	+	Intergenic	RLTR15|LTR|ERVK	-92854	NM_013880	224860	Mm.217362	NM_013880	ENSMUSG00000038910	Plcl2	PLC-L2|PRIP-2|Plce2|mKIAA1092	phospholipase C-like 2	protein-coding
MACS_peak_10356	chr17	51058439	51058760	+	intron (NM_001285991, intron 10 of 22)	intron (NM_001285991, intron 10 of 22)	220593	NM_001297747	12228	Mm.392910	NM_009770	ENSMUSG00000022863	Btg3	ANA|tob5	B cell translocation gene 3	protein-coding
MACS_peak_10357	chr17	51601310	51602033	+	Intergenic	ORR1C1|LTR|MaLR	-14077	NR_046166	328837	Mm.236143	NR_046166		C330011F03Rik	C330011F03	RIKEN cDNA C330011F03 gene	ncRNA
MACS_peak_10358	chr17	51834361	51835068	+	Intergenic	RLTR11A2|LTR|ERVK	116665	NM_001163630	20230	Mm.311655	NM_009122	ENSMUSG00000023927	Satb1	2610306G12Rik|AW413156	special AT-rich sequence binding protein 1	protein-coding
MACS_peak_10359	chr17	51953455	51953945	+	intron (NM_001163632, intron 1 of 10)	intron (NM_001163632, intron 1 of 10)	-2321	NM_001163630	20230	Mm.311655	NM_009122	ENSMUSG00000023927	Satb1	2610306G12Rik|AW413156	special AT-rich sequence binding protein 1	protein-coding
MACS_peak_10360	chr17	51976076	51976758	+	Intergenic	Intergenic	-3802	NM_001163632	20230	Mm.311655	NM_009122	ENSMUSG00000023927	Satb1	2610306G12Rik|AW413156	special AT-rich sequence binding protein 1	protein-coding
MACS_peak_10361	chr17	51978639	51979166	+	Intergenic	Intergenic	-6287	NM_001163632	20230	Mm.311655	NM_009122	ENSMUSG00000023927	Satb1	2610306G12Rik|AW413156	special AT-rich sequence binding protein 1	protein-coding
MACS_peak_10367	chr17	52867935	52868731	+	intron (NM_001031811, intron 2 of 10)	intron (NM_001031811, intron 2 of 10)	126299	NM_001031811	211468	Mm.399068	NM_001031811	ENSMUSG00000035580	Kcnh8	C130090D05Rik|ELK|ELK1|ELK3|Kv12.1	potassium voltage-gated channel, subfamily H (eag-related), member 8	protein-coding
MACS_peak_10369	chr17	53146026	53146729	+	Intergenic	IAPEz-int|LTR|ERVK	-25047	NM_001031811	211468	Mm.399068	NM_001031811	ENSMUSG00000035580	Kcnh8	C130090D05Rik|ELK|ELK1|ELK3|Kv12.1	potassium voltage-gated channel, subfamily H (eag-related), member 8	protein-coding
MACS_peak_10371	chr17	53595283	53596086	+	intron (NM_172497, intron 1 of 12)	BGLII|LTR|ERVK	6962	NM_172497	211482	Mm.60887	NM_172497	ENSMUSG00000023931	Efhb	4921525D22Rik	EF hand domain family, member B	protein-coding
MACS_peak_10374	chr17	53700816	53701593	+	Intergenic	RLTR11B|LTR|ERVK	-5092	NM_020005	18519	Mm.255025	NM_020005	ENSMUSG00000000708	Kat2b	A930006P13Rik|AI461839|AW536563|Pcaf|p/CAF	K(lysine) acetyltransferase 2B	protein-coding
MACS_peak_10375	chr17	53712375	53712917	+	intron (NM_020005, intron 1 of 17)	RLTR19-int|LTR|ERVK	6350	NM_020005	18519	Mm.255025	NM_020005	ENSMUSG00000000708	Kat2b	A930006P13Rik|AI461839|AW536563|Pcaf|p/CAF	K(lysine) acetyltransferase 2B	protein-coding
MACS_peak_1038	chr1	114676104	114676816	+	Intergenic	RLTR13B1|LTR|ERVK	-914965	NM_001081316	319901	Mm.103468	NM_001081316	ENSMUSG00000038702	Dsel	9330132E09Rik	dermatan sulfate epimerase-like	protein-coding
MACS_peak_10386	chr17	54045046	54045860	+	Intergenic	MMETn-int|LTR|ERVK	-60170	NM_026935	69083	Mm.19320	NM_026935		Sult1c2	1810008N17Rik|ST1C1|ST1C2|Sult1c1	sulfotransferase family, cytosolic, 1C, member 2	protein-coding
MACS_peak_10390	chr17	54535618	54536185	+	Intergenic	Intergenic	-26502	NR_045825	69418	Mm.391004	NR_045825		1700025K24Rik	-	RIKEN cDNA 1700025K24 gene	ncRNA
MACS_peak_10393	chr17	54761011	54761735	+	Intergenic	RLTR13B3|LTR|ERVK	-251974	NR_045825	69418	Mm.391004	NR_045825		1700025K24Rik	-	RIKEN cDNA 1700025K24 gene	ncRNA
MACS_peak_10394	chr17	54846863	54847337	+	Intergenic	RLTR13C2|LTR|ERVK	-337701	NR_045825	69418	Mm.391004	NR_045825		1700025K24Rik	-	RIKEN cDNA 1700025K24 gene	ncRNA
MACS_peak_10395	chr17	54929088	54929621	+	Intergenic	Intergenic	-419955	NR_045825	69418	Mm.391004	NR_045825		1700025K24Rik	-	RIKEN cDNA 1700025K24 gene	ncRNA
MACS_peak_104	chr1	11267773	11268520	+	intron (NM_001033636, intron 3 of 5)	intron (NM_001033636, intron 3 of 5)	14102	NM_001033636	109294	Mm.123247	NM_029525	ENSMUSG00000048960	Prex2	6230420N16Rik|AI316880|AI553603|C030045D06Rik|D430013K02|Depdc2|P-Rex2	phosphatidylinositol-3,4,5-trisphosphate-dependent Rac exchange factor 2	protein-coding
MACS_peak_10402	chr17	56062680	56063191	+	Intergenic	(GAAA)n|Simple_repeat|Simple_repeat	21747	NM_146249	240120	Mm.441018	NM_146249		Zfp119b	-	zinc finger protein 119b	protein-coding
MACS_peak_10403	chr17	56091185	56091832	+	promoter-TSS (NM_015766)	promoter-TSS (NM_015766)	-538	NM_015766	50498	Mm.256798	NM_015766	ENSMUSG00000003206	Ebi3	EBI-3|IL-27	Epstein-Barr virus induced gene 3	protein-coding
MACS_peak_10404	chr17	56176021	56176598	+	promoter-TSS (NM_013664)	promoter-TSS (NM_013664)	-249	NM_001252471	20405	Mm.1773	NM_013664	ENSMUSG00000003200	Sh3gl1	C77078|EEN|SH3P8|Sh3d2b	SH3-domain GRB2-like 1	protein-coding
MACS_peak_10405	chr17	56193925	56194604	+	intron (NM_013733, intron 3 of 13)	RMER12|LTR|ERVK	14425	NM_013733	27221	Mm.391010	NM_013733	ENSMUSG00000002835	Chaf1a	AL023013|AL024058|CAF-1|Cac1p	chromatin assembly factor 1, subunit A (p150)	protein-coding
MACS_peak_10409	chr17	56408300	56409058	+	TTS (NM_174989)	TTS (NM_174989)	7511	NM_174989	106759	Mm.203952	NM_174989	ENSMUSG00000047123	Ticam1	AW046014|AW547018|TICAM-1|TRIF	toll-like receptor adaptor molecule 1	protein-coding
MACS_peak_10410	chr17	56437597	56437963	+	intron (NM_029799, intron 1 of 2)	L2a|LINE|L2	1929	NM_029799	76920	Mm.329132	NM_029799	ENSMUSG00000073380	Arrdc5	1700013E09Rik	arrestin domain containing 5	protein-coding
MACS_peak_10411	chr17	56724269	56724617	+	promoter-TSS (NM_001163300)	promoter-TSS (NM_001163300)	38	NM_001163300	224903	Mm.255066	NM_001163300	ENSMUSG00000071054	Safb	3110021E02Rik|5330423C17Rik|AU018122|D18386|E130307D12|HAP|HET|SAF-B1|SAFB1	scaffold attachment factor B	protein-coding
MACS_peak_10413	chr17	56796010	56796419	+	intron (NM_175350, intron 15 of 21)	RLTR11A|LTR|ERVK	-16434	NM_001252466	71810	Mm.29608	NM_027933	ENSMUSG00000002372	Ranbp3	2610024N24Rik|AA408221	RAN binding protein 3	protein-coding
MACS_peak_10414	chr17	56848944	56849482	+	intron (NR_045519, intron 14 of 16)	PB1D7|SINE|Alu	7131	NM_178926	106639	Mm.37290	NM_178926	ENSMUSG00000054723	Vmac	AI662250	vimentin-type intermediate filament associated coiled-coil protein	protein-coding
MACS_peak_10415	chr17	56972748	56973380	+	Intergenic	RLTR25A|LTR|ERVK	-2633	NM_027787	19725	Mm.102	NM_009056	ENSMUSG00000024206	Rfx2	5430432H19Rik	regulatory factor X, 2 (influences HLA class II expression)	protein-coding
MACS_peak_10416	chr17	56989148	56989560	+	exon (NM_001039114, exon 10 of 15)	exon (NM_001039114, exon 10 of 15)	-18923	NM_027787	19725	Mm.102	NM_009056	ENSMUSG00000024206	Rfx2	5430432H19Rik	regulatory factor X, 2 (influences HLA class II expression)	protein-coding
MACS_peak_10417	chr17	56997558	56998097	+	intron (NM_001039114, intron 6 of 14)	intron (NM_001039114, intron 6 of 14)	16043	NM_001039114	328845	Mm.179421	NM_001039114	ENSMUSG00000024207	Acsbg2	Bgr	acyl-CoA synthetase bubblegum family member 2	protein-coding
MACS_peak_10418	chr17	57016088	57016717	+	intron (NM_030141, intron 2 of 13)	BGLII|LTR|ERVK	1346	NM_030141	78625	Mm.160106	NM_030141	ENSMUSG00000024209	1700061G19Rik	1700026H02|AI507598	RIKEN cDNA 1700061G19 gene	protein-coding
MACS_peak_10420	chr17	57101919	57102324	+	intron (NM_175731, intron 1 of 5)	intron (NM_175731, intron 1 of 5)	19428	NM_175731	171168	Mm.218784	NM_175731	ENSMUSG00000045019	Acer1	2310024P18Rik|AI662009|Alkcdase1|Asah3|Cer1	alkaline ceramidase 1	protein-coding
MACS_peak_10421	chr17	57130464	57131092	+	exon (NM_017393, exon 3 of 6)	exon (NM_017393, exon 3 of 6)	1091	NM_017393	53895	Mm.287892	NM_017393	ENSMUSG00000002660	Clpp	AU019820|D17Wsu160e	caseinolytic mitochondrial matrix peptidase proteolytic subunit	protein-coding
MACS_peak_10422	chr17	57136291	57136824	+	promoter-TSS (NM_027372)	promoter-TSS (NM_027372)	-205	NM_025538	66400	Mm.196150	NM_025538	ENSMUSG00000002661	Alkbh7	2310045B01Rik|2510008E23Rik|Abh7|Spata11	alkB, alkylation repair homolog 7 (E. coli)	protein-coding
MACS_peak_10423	chr17	57150533	57151093	+	promoter-TSS (NM_133801)	promoter-TSS (NM_133801)	-102	NM_133801	98053	Mm.24632	NM_133801	ENSMUSG00000002658	Gtf2f1	2810405L04Rik|C76800|RAP74	general transcription factor IIF, polypeptide 1	protein-coding
MACS_peak_10426	chr17	57200023	57200435	+	promoter-TSS (NM_025877)	promoter-TSS (NM_025877)	-943	NM_025877	66972	Mm.23720	NM_025877	ENSMUSG00000046329	Slc25a23	2310067G05Rik|SCaMC-3	solute carrier family 25 (mitochondrial carrier; phosphate carrier), member 23	protein-coding
MACS_peak_10427	chr17	57306411	57306768	+	Intergenic	Intergenic	-17389	NM_011617	21948	Mm.42228	NM_011617	ENSMUSG00000019489	Cd70	CD27LG|Cd27l|Tnfsf7	CD70 antigen	protein-coding
MACS_peak_10428	chr17	57715684	57716207	+	Intergenic	MMETn-int|LTR|ERVK	-31208	NM_001104591	224916	Mm.469889	NM_001104591	ENSMUSG00000090655	Vmn2r120	EG224916	vomeronasal 2, receptor 120	protein-coding
MACS_peak_10431	chr17	57784797	57785545	+	Intergenic	ETnERV2-int|LTR|ERVK	-100434	NM_001104591	224916	Mm.469889	NM_001104591	ENSMUSG00000090655	Vmn2r120	EG224916	vomeronasal 2, receptor 120	protein-coding
MACS_peak_10434	chr17	57938716	57939271	+	intron (NM_001081653, intron 1 of 23)	intron (NM_001081653, intron 1 of 23)	30000	NM_001081653	620292	Mm.391030	NM_001081653	ENSMUSG00000038048	Cntnap5c	Caspr5-3|EG620292|Gm325	contactin associated protein-like 5C	protein-coding
MACS_peak_1044	chr1	115000114	115000577	+	Intergenic	MER74A|LTR|ERVL	-1238850	NM_001081316	319901	Mm.103468	NM_001081316	ENSMUSG00000038702	Dsel	9330132E09Rik	dermatan sulfate epimerase-like	protein-coding
MACS_peak_10463	chr17	64000403	64000921	+	Intergenic	Lx7|LINE|L1	-150733	NM_015794	50758	Mm.136366	NM_015794		Fbxl17	6330576B01Rik|AI452053|BB073797|C130023C01Rik|Fbx13|Fbxo13	F-box and leucine-rich repeat protein 17	protein-coding
MACS_peak_10467	chr17	64152977	64153294	+	Intergenic	Intergenic	-60195	NM_001037997	14158	Mm.23039	NM_008000	ENSMUSG00000000127	Fert2	AV082135|C330004K01Rik|Fer|Fert	fer (fms/fps related) protein kinase, testis specific 2	protein-coding
MACS_peak_10468	chr17	64402766	64403594	+	intron (NM_008000, intron 10 of 13)	intron (NM_008000, intron 10 of 13)	115859	NM_008000	14158	Mm.23039	NM_008000	ENSMUSG00000000127	Fert2	AV082135|C330004K01Rik|Fer|Fert	fer (fms/fps related) protein kinase, testis specific 2	protein-coding
MACS_peak_10470	chr17	64425745	64426187	+	intron (NM_008000, intron 10 of 13)	BGLII|LTR|ERVK	138645	NM_008000	14158	Mm.23039	NM_008000	ENSMUSG00000000127	Fert2	AV082135|C330004K01Rik|Fer|Fert	fer (fms/fps related) protein kinase, testis specific 2	protein-coding
MACS_peak_10471	chr17	64580480	64580948	+	Intergenic	B3|SINE|B2	100509	NM_144859	224938	Mm.489681	NM_144859	ENSMUSG00000024083	Pja2	AI447901|AL022700|Neurodap1|mKIAA0438	praja 2, RING-H2 motif containing	protein-coding
MACS_peak_10473	chr17	64642318	64642836	+	intron (NM_144859, intron 4 of 8)	RSINE1|SINE|B4	38646	NM_144859	224938	Mm.489681	NM_144859	ENSMUSG00000024083	Pja2	AI447901|AL022700|Neurodap1|mKIAA0438	praja 2, RING-H2 motif containing	protein-coding
MACS_peak_10476	chr17	65098298	65098808	+	intron (NM_008549, intron 20 of 21)	intron (NM_008549, intron 20 of 21)	-17898	NR_105051	101202683	Mm.393309	NR_105051		Dreh	-	down-regulated in hepatocellular carcinoma	ncRNA
MACS_peak_10477	chr17	65222755	65223428	+	Intergenic	Intergenic	106640	NR_105051	101202683	Mm.393309	NR_105051		Dreh	-	down-regulated in hepatocellular carcinoma	ncRNA
MACS_peak_10479	chr17	65570695	65571656	+	Intergenic	RLTR13B2|LTR|ERVK	318947	NM_001008973	381107	Mm.141275	NM_001008973	ENSMUSG00000045036	Tmem232	E130009J12Rik|Gm940|Tes13-L|Tes13-S	transmembrane protein 232	protein-coding
MACS_peak_1048	chr1	115855195	115856492	+	Intergenic	Intergenic	-1725871	NM_001077425	636808	Mm.101576	NM_001077425	ENSMUSG00000070695	Cntnap5a	Caspr5-1|EG636808	contactin associated protein-like 5A	protein-coding
MACS_peak_10482	chr17	65925074	65925493	+	Intergenic	MTB|LTR|MaLR	-35161	NM_001289486	381107	Mm.141275	NM_001008973	ENSMUSG00000045036	Tmem232	E130009J12Rik|Gm940|Tes13-L|Tes13-S	transmembrane protein 232	protein-coding
MACS_peak_10483	chr17	66051298	66052013	+	intron (NM_133685, intron 3 of 6)	intron (NM_133685, intron 3 of 6)	-60111	NM_001146002	213272	Mm.255732	NM_153519	ENSMUSG00000050612	Txndc2	AU021712|Sptrx-1|Sptrx1|Trx4	thioredoxin domain containing 2 (spermatozoa)	protein-coding
MACS_peak_10484	chr17	66075436	66076002	+	intron (NM_133685, intron 1 of 6)	intron (NM_133685, intron 1 of 6)	46373	NM_133685	106572	Mm.29274	NM_133685	ENSMUSG00000056515	Rab31	1700093E07Rik|AI415285|Rab22B	RAB31, member RAS oncogene family	protein-coding
MACS_peak_10485	chr17	66125360	66126007	+	Intergenic	BGLII|LTR|ERVK	-3591	NM_133685	106572	Mm.29274	NM_133685	ENSMUSG00000056515	Rab31	1700093E07Rik|AI415285|Rab22B	RAB31, member RAS oncogene family	protein-coding
MACS_peak_10487	chr17	66159672	66160112	+	non-coding (NR_104465, exon 5 of 19)	non-coding (NR_104465, exon 5 of 19)	27197	NR_104465	70351	Mm.48686	NM_146081	ENSMUSG00000061950	Ppp4r1	3110001J10Rik|Pp4r1	protein phosphatase 4, regulatory subunit 1	protein-coding
MACS_peak_10488	chr17	66217315	66217834	+	intron (NM_009067, intron 1 of 9)	B1_Mur3|SINE|Alu	16689	NM_001198949	19765	Mm.17009	NM_009067	ENSMUSG00000024096	Ralbp1	RLIP76|Rip1	ralA binding protein 1	protein-coding
MACS_peak_10489	chr17	66452910	66453964	+	Intergenic	B1_Mus2|SINE|Alu	-2538	NM_028388	72900	Mm.2206	NM_028388	ENSMUSG00000024099	Ndufv2	2900010C23Rik	NADH dehydrogenase (ubiquinone) flavoprotein 2	protein-coding
MACS_peak_10490	chr17	66539871	66540483	+	Intergenic	Intergenic	67317	NM_001003919	320209	Mm.259605	NM_001003919	ENSMUSG00000035842	Ddx11	4732462I11Rik|CHL1|CHLR1|KRG2|essa15a	DEAD/H (Asp-Glu-Ala-Asp/His) box helicase 11	protein-coding
MACS_peak_10496	chr17	66819075	66820107	+	Intergenic	Intergenic	-20501	NM_001114098	68617	Mm.33421	NM_172963	ENSMUSG00000052105	Mtcl1	1110012J17Rik|Ccdc165|D130071O13|Kiaa0802|Soga2|mKIAA0802|t8219b25	microtubule crosslinking factor 1	protein-coding
MACS_peak_105	chr1	11319943	11320763	+	Intergenic	RLTR9A|LTR|ERVK	66309	NM_001033636	109294	Mm.123247	NM_029525	ENSMUSG00000048960	Prex2	6230420N16Rik|AI316880|AI553603|C030045D06Rik|D430013K02|Depdc2|P-Rex2	phosphatidylinositol-3,4,5-trisphosphate-dependent Rac exchange factor 2	protein-coding
MACS_peak_1050	chr1	116538016	116538929	+	Intergenic	RLTR13D6|LTR|ERVK	-1043242	NM_001077425	636808	Mm.101576	NM_001077425	ENSMUSG00000070695	Cntnap5a	Caspr5-1|EG636808	contactin associated protein-like 5A	protein-coding
MACS_peak_10500	chr17	66834906	66835634	+	Intergenic	Intergenic	33740	NM_024448	19328	Mm.248313	NM_024448	ENSMUSG00000023460	Rab12	2900054P15Rik|AW555448|C77700	RAB12, member RAS oncogene family	protein-coding
MACS_peak_10501	chr17	66835838	66836605	+	Intergenic	Intergenic	32789	NM_024448	19328	Mm.248313	NM_024448	ENSMUSG00000023460	Rab12	2900054P15Rik|AW555448|C77700	RAB12, member RAS oncogene family	protein-coding
MACS_peak_10505	chr17	67592460	67592888	+	intron (NM_008984, intron 1 of 30)	intron (NM_008984, intron 1 of 30)	111125	NM_008984	19274	Mm.311809	NM_008984	ENSMUSG00000033278	Ptprm	RPTPmu|mKIAA4044	protein tyrosine phosphatase, receptor type, M	protein-coding
MACS_peak_10507	chr17	68070470	68070980	+	intron (NM_008480, intron 3 of 62)	intron (NM_008480, intron 3 of 62)	24120	NM_008480	16772	Mm.303386	NM_008480	ENSMUSG00000032796	Lama1	AA408497|Lama	laminin, alpha 1	protein-coding
MACS_peak_10510	chr17	68345385	68345906	+	intron (NM_172964, intron 1 of 17)	intron (NM_172964, intron 1 of 17)	7803	NM_172964	268970	Mm.9935	NM_172964	ENSMUSG00000024043	Arhgap28	AU044757|AW550892|E130310N06	Rho GTPase activating protein 28	protein-coding
MACS_peak_10514	chr17	69571202	69571754	+	intron (NM_013813, intron 3 of 21)	intron (NM_013813, intron 3 of 21)	55068	NR_045428	69750	Mm.439063	NR_045428		2410021H03Rik	-	RIKEN cDNA 2410021H03 gene	ncRNA
MACS_peak_10515	chr17	69626237	69627018	+	promoter-TSS (NR_045428)	promoter-TSS (NR_045428)	-81	NR_045428	69750	Mm.439063	NR_045428		2410021H03Rik	-	RIKEN cDNA 2410021H03 gene	ncRNA
MACS_peak_1052	chr1	116746144	116746724	+	Intergenic	RLTR9B2|LTR|ERVK	-835280	NM_001077425	636808	Mm.101576	NM_001077425	ENSMUSG00000070695	Cntnap5a	Caspr5-1|EG636808	contactin associated protein-like 5A	protein-coding
MACS_peak_10521	chr17	69942272	69942952	+	Intergenic	RLTR13B3|LTR|ERVK	153946	NM_001145192	320722	Mm.400254	NM_001145192	ENSMUSG00000091636	A330050F15Rik	-	RIKEN cDNA A330050F15 gene	protein-coding
MACS_peak_10525	chr17	70752972	70753567	+	Intergenic	Intergenic	-20863	NM_177639	224997	Mm.311840	NM_027712	ENSMUSG00000003279	Dlgap1	4933422O14Rik|9630002F18|AI845682|AI848168|BB075781|D17Bwg0511e|GKAP/SAPAP|GKPA/SAPAP|Gkap|Sapap1|mKIAA4162	discs, large (Drosophila) homolog-associated protein 1	protein-coding
MACS_peak_10527	chr17	71099542	71100854	+	intron (NM_001128181, intron 5 of 9)	intron (NM_001128181, intron 5 of 9)	95919	NM_001164077	21815	Mm.101034	NM_009372	ENSMUSG00000047407	Tgif1	AA959811|AI462167|Tgif	TGFB-induced factor homeobox 1	protein-coding
MACS_peak_10529	chr17	71118645	71119050	+	intron (NM_001128180, intron 6 of 9)	intron (NM_001128180, intron 6 of 9)	77270	NM_001164077	21815	Mm.101034	NM_009372	ENSMUSG00000047407	Tgif1	AA959811|AI462167|Tgif	TGFB-induced factor homeobox 1	protein-coding
MACS_peak_10532	chr17	71159621	71160057	+	intron (NM_001128180, intron 8 of 9)	B2_Mm1t|SINE|B2	36278	NM_001164077	21815	Mm.101034	NM_009372	ENSMUSG00000047407	Tgif1	AA959811|AI462167|Tgif	TGFB-induced factor homeobox 1	protein-coding
MACS_peak_10533	chr17	71167004	71167549	+	intron (NM_001128180, intron 9 of 9)	intron (NM_001128180, intron 9 of 9)	28841	NM_001164077	21815	Mm.101034	NM_009372	ENSMUSG00000047407	Tgif1	AA959811|AI462167|Tgif	TGFB-induced factor homeobox 1	protein-coding
MACS_peak_10534	chr17	71176880	71178462	+	Intergenic	Intergenic	18446	NM_001164077	21815	Mm.101034	NM_009372	ENSMUSG00000047407	Tgif1	AA959811|AI462167|Tgif	TGFB-induced factor homeobox 1	protein-coding
MACS_peak_10535	chr17	71178549	71179329	+	Intergenic	B2_Mm2|SINE|B2	17178	NM_001164077	21815	Mm.101034	NM_009372	ENSMUSG00000047407	Tgif1	AA959811|AI462167|Tgif	TGFB-induced factor homeobox 1	protein-coding
MACS_peak_10537	chr17	71182627	71183160	+	Intergenic	ID4_|SINE|ID	13224	NM_001164077	21815	Mm.101034	NM_009372	ENSMUSG00000047407	Tgif1	AA959811|AI462167|Tgif	TGFB-induced factor homeobox 1	protein-coding
MACS_peak_10539	chr17	71215515	71216625	+	Intergenic	Intergenic	-13198	NM_001164074	21815	Mm.101034	NM_009372	ENSMUSG00000047407	Tgif1	AA959811|AI462167|Tgif	TGFB-induced factor homeobox 1	protein-coding
MACS_peak_10541	chr17	71241813	71242503	+	Intergenic	Intergenic	-39286	NM_001164074	21815	Mm.101034	NM_009372	ENSMUSG00000047407	Tgif1	AA959811|AI462167|Tgif	TGFB-induced factor homeobox 1	protein-coding
MACS_peak_10542	chr17	71249741	71250553	+	Intergenic	Intergenic	-47275	NM_001164074	21815	Mm.101034	NM_009372	ENSMUSG00000047407	Tgif1	AA959811|AI462167|Tgif	TGFB-induced factor homeobox 1	protein-coding
MACS_peak_10543	chr17	71266748	71267407	+	Intergenic	Intergenic	-64205	NM_001164074	21815	Mm.101034	NM_009372	ENSMUSG00000047407	Tgif1	AA959811|AI462167|Tgif	TGFB-induced factor homeobox 1	protein-coding
MACS_peak_10545	chr17	71709762	71710446	+	intron (NM_028887, intron 41 of 47)	LTRIS2|LTR|ERV1	-18960	NR_028023	100043644	Mm.362377	NR_028023		Gm4566	-	ubiquitin specific peptidase 16 pseudogene	pseudo
MACS_peak_10546	chr17	71769596	71770111	+	intron (NM_028887, intron 17 of 47)	ETnERV2-int|LTR|ERVK	54830	NM_028887	74355	Mm.194450	NM_028887	ENSMUSG00000024054	Smchd1	4931400A14Rik|AW554188|MommeD1|mKIAA0650	SMC hinge domain containing 1	protein-coding
MACS_peak_10550	chr17	72262373	72262913	+	intron (NM_007439, intron 12 of 28)	MIRc|SINE|MIR	131356	NM_030179	78785	Mm.196382	NM_030179	ENSMUSG00000024059	Clip4	1700024K14Rik|1700074B05Rik|4833417L20Rik|5830409B12Rik|Rsnl2	CAP-GLY domain containing linker protein family, member 4	protein-coding
MACS_peak_10555	chr17	73231028	73231751	+	Intergenic	RLTR9A|LTR|ERVK	-36256	NM_029999	77889	Mm.154109	NM_029999	ENSMUSG00000024063	Lbh	1810009F10Rik|6720416L16Rik	limb-bud and heart	protein-coding
MACS_peak_10556	chr17	74153677	74154296	+	promoter-TSS (NM_020578)	promoter-TSS (NM_020578)	-195	NM_020578	57440	Mm.18526	NM_020578	ENSMUSG00000024065	Ehd3	Ehd2	EH-domain containing 3	protein-coding
MACS_peak_10559	chr17	74487426	74488327	+	Intergenic	RLTR13D6|LTR|ERVK	-90620	NM_053188	94224	Mm.38933	NM_053188	ENSMUSG00000038541	Srd5a2	5ART2|S5AR 2	steroid 5 alpha-reductase 2	protein-coding
MACS_peak_1056	chr1	117581129	117581599	+	promoter-TSS (NM_001077425)	promoter-TSS (NM_001077425)	-350	NM_001077425	636808	Mm.101576	NM_001077425	ENSMUSG00000070695	Cntnap5a	Caspr5-1|EG636808	contactin associated protein-like 5A	protein-coding
MACS_peak_10561	chr17	74782596	74783066	+	intron (NM_001162870, intron 15 of 16)	B1_Mm|SINE|Alu	-12117	NM_001252478	210148	Mm.243943	NM_144798	ENSMUSG00000024069	Slc30a6	9530029F08Rik|ZnT6	solute carrier family 30 (zinc transporter), member 6	protein-coding
MACS_peak_10566	chr17	75323280	75323888	+	Intergenic	Intergenic	-81285	NM_019919	268977	Mm.269747	NM_019919	ENSMUSG00000001870	Ltbp1	9430031G15Rik|9830146M04|Ltbp-1|Tgfb|b2b1000Clo	latent transforming growth factor beta binding protein 1	protein-coding
MACS_peak_10567	chr17	75366586	75367002	+	Intergenic	Intergenic	-38075	NM_019919	268977	Mm.269747	NM_019919	ENSMUSG00000001870	Ltbp1	9430031G15Rik|9830146M04|Ltbp-1|Tgfb|b2b1000Clo	latent transforming growth factor beta binding protein 1	protein-coding
MACS_peak_10576	chr17	76899148	76900110	+	Intergenic	RLTR13D6|LTR|ERVK	639266	NR_033456	100043885	Mm.127562	NR_033456		Gm4710	-	predicted gene 4710	ncRNA
MACS_peak_10585	chr17	79034470	79035604	+	Intergenic	RLTR9A|LTR|ERVK	100863	NM_011500	268980	Mm.311915	NM_011500	ENSMUSG00000024077	Strn	AU022939|D130055P19	striatin, calmodulin binding protein	protein-coding
MACS_peak_10587	chr17	79294711	79295203	+	intron (NM_001163625, intron 3 of 6)	intron (NM_001163625, intron 3 of 6)	11375	NM_001163625	73671	Mm.45514	NM_001163625	ENSMUSG00000038045	Sult6b1	2410078J06Rik|AV101767|ST6B1	sulfotransferase family, cytosolic, 6B, member 1	protein-coding
MACS_peak_10588	chr17	79313169	79313877	+	Intergenic	RLTR41|LTR|ERV1	-2316	NM_001177403	68554	Mm.391820	NM_001177402	ENSMUSG00000062691	Cebpzos	1110001A16Rik	CCAAT/enhancer binding protein (C/EBP), zeta, opposite strand	protein-coding
MACS_peak_10589	chr17	79315052	79315699	+	promoter-TSS (NM_001177403)	promoter-TSS (NM_001177403)	-464	NM_001177403	68554	Mm.391820	NM_001177402	ENSMUSG00000062691	Cebpzos	1110001A16Rik	CCAAT/enhancer binding protein (C/EBP), zeta, opposite strand	protein-coding
MACS_peak_1059	chr1	117966803	117967161	+	intron (NM_001077425, intron 4 of 23)	intron (NM_001077425, intron 4 of 23)	385268	NM_001077425	636808	Mm.101576	NM_001077425	ENSMUSG00000070695	Cntnap5a	Caspr5-1|EG636808	contactin associated protein-like 5A	protein-coding
MACS_peak_10591	chr17	79540340	79540813	+	Intergenic	Intergenic	89330	NM_027455	70536	Mm.293870	NM_027455	ENSMUSG00000024084	Qpct	5730422A13Rik	glutaminyl-peptide cyclotransferase (glutaminyl cyclase)	protein-coding
MACS_peak_10593	chr17	79764175	79764877	+	Intergenic	MER74A|LTR|ERVL	-10095	NM_026514	260409	Mm.140601	NM_026514	ENSMUSG00000036533	Cdc42ep3	3200001F04Rik|AA986861|Borg2|Cep3|UB1	CDC42 effector protein (Rho GTPase binding) 3	protein-coding
MACS_peak_10599	chr17	80403007	80403462	+	Intergenic	Intergenic	58374	NM_144802	72692	Mm.64579	NM_144802	ENSMUSG00000024095	Hnrnpll	2510028H02Rik|2810036L13Rik|AI256697|AI852082|Hnrpll	heterogeneous nuclear ribonucleoprotein L-like	protein-coding
MACS_peak_1060	chr1	118263320	118263723	+	intron (NM_001077425, intron 13 of 23)	intron (NM_001077425, intron 13 of 23)	681807	NM_001077425	636808	Mm.101576	NM_001077425	ENSMUSG00000070695	Cntnap5a	Caspr5-1|EG636808	contactin associated protein-like 5A	protein-coding
MACS_peak_10600	chr17	80447561	80448090	+	intron (NM_144802, intron 6 of 12)	intron (NM_144802, intron 6 of 12)	13783	NM_144802	72692	Mm.64579	NM_144802	ENSMUSG00000024095	Hnrnpll	2510028H02Rik|2810036L13Rik|AI256697|AI852082|Hnrpll	heterogeneous nuclear ribonucleoprotein L-like	protein-coding
MACS_peak_10603	chr17	80654542	80655060	+	intron (NM_198942, intron 13 of 22)	intron (NM_198942, intron 13 of 22)	30972	NM_026053	67242	Mm.279985	NM_026053	ENSMUSG00000055760	Gemin6	2610019B15Rik|2810470M17Rik	gem (nuclear organelle) associated protein 6	protein-coding
MACS_peak_10606	chr17	80862111	80862681	+	intron (NM_009231, intron 1 of 21)	B4A|SINE|B4	17397	NM_009231	20662	Mm.60975	NM_009231	ENSMUSG00000024241	Sos1	4430401P03Rik|9630010N06|AI449023	son of sevenless homolog 1 (Drosophila)	protein-coding
MACS_peak_10607	chr17	80959965	80960622	+	intron (NM_001033443, intron 1 of 9)	intron (NM_001033443, intron 1 of 9)	2881	NM_001033443	381113	Mm.329216	NM_001033443	ENSMUSG00000033966	Cdkl4	AU067824|Gm942	cyclin-dependent kinase-like 4	protein-coding
MACS_peak_10609	chr17	81034887	81035806	+	intron (NM_001290345, intron 13 of 33)	intron (NM_001290345, intron 13 of 33)	-72172	NM_001033443	381113	Mm.329216	NM_001033443	ENSMUSG00000033966	Cdkl4	AU067824|Gm942	cyclin-dependent kinase-like 4	protein-coding
MACS_peak_10610	chr17	81114117	81114668	+	intron (NM_001290345, intron 1 of 33)	intron (NM_001290345, intron 1 of 33)	12973	NM_001290345	225028	Mm.311948	NM_001081357	ENSMUSG00000024242	Map4k3	4833416M01Rik|4833416M07Rik|9530052P13Rik|Glk|MAPKKKK3|MEKKK 3|MEKKK3|RAB8IPL1	mitogen-activated protein kinase kinase kinase kinase 3	protein-coding
MACS_peak_10611	chr17	81184476	81185820	+	Intergenic	Intergenic	-57783	NM_001290345	225028	Mm.311948	NM_001081357	ENSMUSG00000024242	Map4k3	4833416M01Rik|4833416M07Rik|9530052P13Rik|Glk|MAPKKKK3|MEKKK 3|MEKKK3|RAB8IPL1	mitogen-activated protein kinase kinase kinase kinase 3	protein-coding
MACS_peak_10613	chr17	81209749	81210363	+	Intergenic	Intergenic	-82691	NM_001290345	225028	Mm.311948	NM_001081357	ENSMUSG00000024242	Map4k3	4833416M01Rik|4833416M07Rik|9530052P13Rik|Glk|MAPKKKK3|MEKKK 3|MEKKK3|RAB8IPL1	mitogen-activated protein kinase kinase kinase kinase 3	protein-coding
MACS_peak_10615	chr17	81284245	81284771	+	Intergenic	Intergenic	-59464	NM_026516	68027	Mm.357108	NM_026516	ENSMUSG00000024245	Tmem178	2810417M05Rik|Tmem178a	transmembrane protein 178	protein-coding
MACS_peak_10619	chr17	81753379	81753984	+	Intergenic	Intergenic	-289256	NM_028138	72167	Mm.273257	NM_028138	ENSMUSG00000024246	Thumpd2	2810025A12Rik	THUMP domain containing 2	protein-coding
MACS_peak_10620	chr17	81898162	81898704	+	intron (NR_104580, intron 2 of 8)	intron (NR_104580, intron 2 of 8)	239294	NM_001286684	20541	Mm.265834	NM_011406		Slc8a1	AI852629|AV344025|D930008O12Rik|Ncx1	solute carrier family 8 (sodium/calcium exchanger), member 1	protein-coding
MACS_peak_10621	chr17	82014658	82015135	+	intron (NR_104580, intron 2 of 8)	intron (NR_104580, intron 2 of 8)	122831	NM_001286684	20541	Mm.265834	NM_011406		Slc8a1	AI852629|AV344025|D930008O12Rik|Ncx1	solute carrier family 8 (sodium/calcium exchanger), member 1	protein-coding
MACS_peak_10628	chr17	82599200	82599939	+	Intergenic	Lx2B|LINE|L1	-461842	NM_011406	20541	Mm.265834	NM_011406		Slc8a1	AI852629|AV344025|D930008O12Rik|Ncx1	solute carrier family 8 (sodium/calcium exchanger), member 1	protein-coding
MACS_peak_10629	chr17	82672002	82672701	+	Intergenic	Intergenic	-534624	NM_011406	20541	Mm.265834	NM_011406		Slc8a1	AI852629|AV344025|D930008O12Rik|Ncx1	solute carrier family 8 (sodium/calcium exchanger), member 1	protein-coding
MACS_peak_10631	chr17	82705498	82706208	+	Intergenic	Lx8|LINE|L1	-568126	NM_011406	20541	Mm.265834	NM_011406		Slc8a1	AI852629|AV344025|D930008O12Rik|Ncx1	solute carrier family 8 (sodium/calcium exchanger), member 1	protein-coding
MACS_peak_10635	chr17	82836434	82836974	+	Intergenic	RLTR17|LTR|ERVK	640861	NR_045094	100503434	Mm.187281	NR_045094		Gm19689	-	predicted gene, 19689	ncRNA
MACS_peak_10638	chr17	83151170	83151956	+	Intergenic	RLTR27|LTR|ERVK	326002	NR_045094	100503434	Mm.187281	NR_045094		Gm19689	-	predicted gene, 19689	ncRNA
MACS_peak_10639	chr17	83410136	83410567	+	Intergenic	Intergenic	67214	NR_045094	100503434	Mm.187281	NR_045094		Gm19689	-	predicted gene, 19689	ncRNA
MACS_peak_1064	chr1	119206132	119206636	+	Intergenic	Intergenic	1001325	NM_011650	22099	Mm.426637	NM_011650	ENSMUSG00000026374	Tsn	2610034C24Rik|AU040286|C3PO|TB-RBP	translin	protein-coding
MACS_peak_10647	chr17	83876381	83877170	+	intron (NM_001286567, intron 23 of 23)	intron (NM_001286567, intron 23 of 23)	36898	NM_009187	20463	Mm.30072	NM_009187	ENSMUSG00000024248	Cox7a2l	COX7AR|COX7RP|EB1|SIG-81|SIG81|Silg81	cytochrome c oxidase subunit VIIa polypeptide 2-like	protein-coding
MACS_peak_10649	chr17	83935126	83935748	+	Intergenic	Intergenic	-21764	NM_001159529	20463	Mm.30072	NM_009187	ENSMUSG00000024248	Cox7a2l	COX7AR|COX7RP|EB1|SIG-81|SIG81|Silg81	cytochrome c oxidase subunit VIIa polypeptide 2-like	protein-coding
MACS_peak_10651	chr17	84013078	84013492	+	intron (NM_153512, intron 1 of 1)	intron (NM_153512, intron 1 of 1)	17950	NM_153512	225030	Mm.223506	NM_153512	ENSMUSG00000045053	Kcng3	KV6.3|Kv10.1a|Kv10.1b	potassium voltage-gated channel, subfamily G, member 3	protein-coding
MACS_peak_10652	chr17	84053881	84054675	+	Intergenic	Intergenic	-23043	NM_153512	225030	Mm.223506	NM_153512	ENSMUSG00000045053	Kcng3	KV6.3|Kv10.1a|Kv10.1b	potassium voltage-gated channel, subfamily G, member 3	protein-coding
MACS_peak_10656	chr17	84128067	84128890	+	intron (NM_001171053, intron 3 of 13)	B1_Mur2|SINE|Alu	22975	NM_001171052	116871	Mm.277668	NM_054082	ENSMUSG00000055817	Mta3	1110002J22Rik|mKIAA1266	metastasis associated 3	protein-coding
MACS_peak_10658	chr17	84149331	84150123	+	intron (NM_001171053, intron 4 of 13)	RLTR11A|LTR|ERVK	44224	NM_001171052	116871	Mm.277668	NM_054082	ENSMUSG00000055817	Mta3	1110002J22Rik|mKIAA1266	metastasis associated 3	protein-coding
MACS_peak_10659	chr17	84280212	84280899	+	Intergenic	RLTR17|LTR|ERVK	-34425	NM_025325	107766	Mm.30100	NM_025325	ENSMUSG00000000673	Haao	0610007K21Rik|0610012J07Rik|3-HAO|3-HAOxase|3HAO	3-hydroxyanthranilate 3,4-dioxygenase	protein-coding
MACS_peak_1066	chr1	119355520	119356322	+	Intergenic	RMER16-int|LTR|ERVK	851788	NM_011650	22099	Mm.426637	NM_011650	ENSMUSG00000026374	Tsn	2610034C24Rik|AU040286|C3PO|TB-RBP	translin	protein-coding
MACS_peak_10660	chr17	84353799	84354287	+	Intergenic	Intergenic	-107913	NM_025325	107766	Mm.30100	NM_025325	ENSMUSG00000000673	Haao	0610007K21Rik|0610012J07Rik|3-HAO|3-HAOxase|3HAO	3-hydroxyanthranilate 3,4-dioxygenase	protein-coding
MACS_peak_10662	chr17	84388319	84388675	+	Intergenic	L1ME1|LINE|L1	-89503	NR_045458	74473	Mm.399575	NR_045458		4933433H22Rik	-	RIKEN cDNA 4933433H22 gene	ncRNA
MACS_peak_10665	chr17	84750462	84751234	+	intron (NM_183021, intron 26 of 37)	intron (NM_183021, intron 26 of 37)	114700	NM_183021	240174	Mm.246767	NM_177826	ENSMUSG00000024251	Thada	6530405K19|A930021O22|AU019899|BC052885|GITA	thyroid adenoma associated	protein-coding
MACS_peak_10666	chr17	84754222	84755008	+	intron (NM_183021, intron 26 of 37)	RMER16|LTR|ERVK	110933	NM_183021	240174	Mm.246767	NM_177826	ENSMUSG00000024251	Thada	6530405K19|A930021O22|AU019899|BC052885|GITA	thyroid adenoma associated	protein-coding
MACS_peak_10667	chr17	84970858	84971349	+	exon (NM_177606, exon 11 of 30)	exon (NM_177606, exon 11 of 30)	-54736	NM_172256	213575	Mm.246119	NM_172256	ENSMUSG00000024253	Dync2li1	4933404O11Rik|CGI-60|D2lic|LIC3|mD2LIC	dynein cytoplasmic 2 light intermediate chain 1	protein-coding
MACS_peak_10668	chr17	84973279	84973727	+	intron (NM_177606, intron 11 of 29)	MIR3|SINE|MIR	-52336	NM_172256	213575	Mm.246119	NM_172256	ENSMUSG00000024253	Dync2li1	4933404O11Rik|CGI-60|D2lic|LIC3|mD2LIC	dynein cytoplasmic 2 light intermediate chain 1	protein-coding
MACS_peak_10669	chr17	84995556	84996366	+	intron (NM_177606, intron 21 of 29)	intron (NM_177606, intron 21 of 29)	-29878	NM_172256	213575	Mm.246119	NM_172256	ENSMUSG00000024253	Dync2li1	4933404O11Rik|CGI-60|D2lic|LIC3|mD2LIC	dynein cytoplasmic 2 light intermediate chain 1	protein-coding
MACS_peak_10673	chr17	85157568	85158318	+	intron (NM_028233, intron 14 of 37)	intron (NM_028233, intron 14 of 37)	32183	NM_028233	72416	Mm.217027	NM_028233	ENSMUSG00000024120	Lrpprc	3110001K13Rik|C76645|Gp130|Lrp130|Lsfc	leucine-rich PPR-motif containing	protein-coding
MACS_peak_10675	chr17	85356205	85356755	+	promoter-TSS (NM_011151)	promoter-TSS (NM_011151)	283	NR_027929	68531	Mm.249695	NR_027929	ENSMUSG00000097047	1110020A21Rik	2600015P10Rik	RIKEN cDNA 1110020A21 gene	ncRNA
MACS_peak_10676	chr17	85489550	85490089	+	promoter-TSS (NM_001163624)	promoter-TSS (NM_001163624)	-205	NM_001163624	213760	Mm.259035	NM_145984	ENSMUSG00000024127	Prepl	2810457N15Rik|9530014L06Rik|D030028O16Rik|mKIAA0436	prolyl endopeptidase-like	protein-coding
MACS_peak_10678	chr17	85560460	85560914	+	intron (NM_028576, intron 3 of 10)	intron (NM_028576, intron 3 of 10)	70647	NM_028576	73582	Mm.260753	NM_028576		Camkmt	1700106N22Rik|AI480743|AV099781|CLNMT|CaM KMT	calmodulin-lysine N-methyltransferase	protein-coding
MACS_peak_10679	chr17	85562144	85562936	+	intron (NM_028576, intron 3 of 10)	intron (NM_028576, intron 3 of 10)	72500	NM_028576	73582	Mm.260753	NM_028576		Camkmt	1700106N22Rik|AI480743|AV099781|CLNMT|CaM KMT	calmodulin-lysine N-methyltransferase	protein-coding
MACS_peak_1068	chr1	119485284	119485769	+	Intergenic	L1Md_T|LINE|L1	722183	NM_011650	22099	Mm.426637	NM_011650	ENSMUSG00000026374	Tsn	2610034C24Rik|AU040286|C3PO|TB-RBP	translin	protein-coding
MACS_peak_10680	chr17	85656228	85656831	+	intron (NM_028576, intron 3 of 10)	intron (NM_028576, intron 3 of 10)	166489	NM_028576	73582	Mm.260753	NM_028576		Camkmt	1700106N22Rik|AI480743|AV099781|CLNMT|CaM KMT	calmodulin-lysine N-methyltransferase	protein-coding
MACS_peak_10685	chr17	86561032	86561634	+	Intergenic	Intergenic	-5792	NM_011104	18754	Mm.24614	NM_011104	ENSMUSG00000045038	Prkce	5830406C15Rik|PKC[e]|PKCepsilon|Pkce|R75156	protein kinase C, epsilon	protein-coding
MACS_peak_10687	chr17	87015491	87015920	+	intron (NM_011104, intron 11 of 14)	intron (NM_011104, intron 11 of 14)	-137499	NM_010137	13819	Mm.1415	NM_010137	ENSMUSG00000024140	Epas1	HIF-2alpha|HIF2A|HLF|HRF|MOP2|bHLHe73	endothelial PAS domain protein 1	protein-coding
MACS_peak_10689	chr17	87326149	87326637	+	Intergenic	RLTR14|LTR|ERV1	9705	NM_030104	78469	Mm.67234	NM_030104	ENSMUSG00000037689	Tmem247	1700090G07Rik	transmembrane protein 247	protein-coding
MACS_peak_10693	chr17	87870923	87871646	+	Intergenic	Intergenic	-25009	NM_007589	12314	Mm.329243	NM_007589	ENSMUSG00000036438	Calm2	1500001E21Rik|AL024017	calmodulin 2	protein-coding
MACS_peak_10695	chr17	87970899	87971517	+	Intergenic	Intergenic	-64111	NM_008532	17075	Mm.4259	NM_008532	ENSMUSG00000045394	Epcam	CD326|EGP|EGP-2|Egp314|Ep-CAM|EpCAM1|GA733-2|Ly74|TROP1|Tacsd1|Tacstd1|gp40	epithelial cell adhesion molecule	protein-coding
MACS_peak_10699	chr17	88076684	88077501	+	intron (NM_008628, intron 1 of 15)	B1_Mus2|SINE|Alu	5195	NM_008628	17685	Mm.4619	NM_008628	ENSMUSG00000024151	Msh2	AI788990	mutS homolog 2 (E. coli)	protein-coding
MACS_peak_1070	chr1	119546849	119547213	+	Intergenic	RLTR13D6|LTR|ERVK	660678	NM_011650	22099	Mm.426637	NM_011650	ENSMUSG00000026374	Tsn	2610034C24Rik|AU040286|C3PO|TB-RBP	translin	protein-coding
MACS_peak_10700	chr17	88095177	88095725	+	intron (NM_008628, intron 7 of 15)	intron (NM_008628, intron 7 of 15)	23554	NM_008628	17685	Mm.4619	NM_008628	ENSMUSG00000024151	Msh2	AI788990	mutS homolog 2 (E. coli)	protein-coding
MACS_peak_10705	chr17	88254297	88255269	+	Intergenic	MMETn-int|LTR|ERVK	-57449	NM_199251	210741	Mm.312046	NM_199251	ENSMUSG00000050138	Kcnk12	mntk1	potassium channel, subfamily K, member 12	protein-coding
MACS_peak_10708	chr17	88362793	88363262	+	Intergenic	T-rich|Low_complexity|Low_complexity	-11363	NM_010830	17688	Mm.18210	NM_010830	ENSMUSG00000005370	Msh6	AU044881|AW550279|GTBP|Gtmbp	mutS homolog 6 (E. coli)	protein-coding
MACS_peak_10709	chr17	88372584	88374076	+	Intergenic	Intergenic	-1060	NM_010830	17688	Mm.18210	NM_010830	ENSMUSG00000005370	Msh6	AU044881|AW550279|GTBP|Gtmbp	mutS homolog 6 (E. coli)	protein-coding
MACS_peak_10714	chr17	88803721	88804495	+	Intergenic	Intergenic	-35944	NM_180974	14236	Mm.112824	NM_180974	ENSMUSG00000034998	Foxn2	3230402J05Rik|6030465J18Rik|Fkh19|Foxn1|HTLF	forkhead box N2	protein-coding
MACS_peak_10716	chr17	88867870	88868638	+	intron (NM_180974, intron 2 of 5)	Lx|LINE|L1	28202	NM_180974	14236	Mm.112824	NM_180974	ENSMUSG00000034998	Foxn2	3230402J05Rik|6030465J18Rik|Fkh19|Foxn1|HTLF	forkhead box N2	protein-coding
MACS_peak_10717	chr17	88897768	88898260	+	Intergenic	B1F1|SINE|Alu	-31450	NM_028658	73825	Mm.271817	NM_028658	ENSMUSG00000034709	Ppp1r21	1110018J12Rik|AI426045|AW550781|Ccdc128|Klraq1	protein phosphatase 1, regulatory subunit 21	protein-coding
MACS_peak_10721	chr17	89670256	89670976	+	Intergenic	LTRIS2|LTR|ERV1	-48951	NR_045432	71052	Mm.399489	NR_045432		4933400B14Rik	-	RIKEN cDNA 4933400B14 gene	ncRNA
MACS_peak_10722	chr17	89671518	89672083	+	Intergenic	RLTR25B|LTR|ERVK	-47767	NR_045432	71052	Mm.399489	NR_045432		4933400B14Rik	-	RIKEN cDNA 4933400B14 gene	ncRNA
MACS_peak_10727	chr17	90643581	90644085	+	intron (NM_177284, intron 16 of 20)	intron (NM_177284, intron 16 of 20)	-616676	NR_045463	78800	Mm.410772	NR_045463	ENSMUSG00000090160	4930480K15Rik	-	RIKEN cDNA 4930480K15 gene	ncRNA
MACS_peak_10729	chr17	90789550	90790313	+	intron (NM_177284, intron 15 of 20)	intron (NM_177284, intron 15 of 20)	-470578	NR_045463	78800	Mm.410772	NR_045463	ENSMUSG00000090160	4930480K15Rik	-	RIKEN cDNA 4930480K15 gene	ncRNA
MACS_peak_1073	chr1	119712798	119713223	+	Intergenic	RLTR13D6|LTR|ERVK	494699	NM_011650	22099	Mm.426637	NM_011650	ENSMUSG00000026374	Tsn	2610034C24Rik|AU040286|C3PO|TB-RBP	translin	protein-coding
MACS_peak_10730	chr17	90983126	90983635	+	intron (NM_177284, intron 13 of 20)	intron (NM_177284, intron 13 of 20)	-277129	NR_045463	78800	Mm.410772	NR_045463	ENSMUSG00000090160	4930480K15Rik	-	RIKEN cDNA 4930480K15 gene	ncRNA
MACS_peak_10731	chr17	90983968	90984653	+	intron (NM_177284, intron 13 of 20)	intron (NM_177284, intron 13 of 20)	-276199	NR_045463	78800	Mm.410772	NR_045463	ENSMUSG00000090160	4930480K15Rik	-	RIKEN cDNA 4930480K15 gene	ncRNA
MACS_peak_10732	chr17	91024160	91024649	+	intron (NM_177284, intron 8 of 20)	RLTR9A|LTR|ERVK	-236105	NR_045463	78800	Mm.410772	NR_045463	ENSMUSG00000090160	4930480K15Rik	-	RIKEN cDNA 4930480K15 gene	ncRNA
MACS_peak_10734	chr17	91187306	91187919	+	intron (NM_020252, intron 4 of 22)	intron (NM_020252, intron 4 of 22)	-72897	NR_045463	78800	Mm.410772	NR_045463	ENSMUSG00000090160	4930480K15Rik	-	RIKEN cDNA 4930480K15 gene	ncRNA
MACS_peak_10735	chr17	91242341	91243032	+	intron (NM_020252, intron 4 of 22)	intron (NM_020252, intron 4 of 22)	-17823	NR_045463	78800	Mm.410772	NR_045463	ENSMUSG00000090160	4930480K15Rik	-	RIKEN cDNA 4930480K15 gene	ncRNA
MACS_peak_10737	chr17	91671957	91672399	+	Intergenic	LTRIS2|LTR|ERV1	-180036	NM_020252	18189	Mm.491332	NM_020252	ENSMUSG00000024109	Nrxn1	1700062G21Rik|9330127H16Rik|A230068P09Rik|mKIAA0578	neurexin I	protein-coding
MACS_peak_10738	chr17	91775612	91776111	+	Intergenic	Intergenic	-283719	NM_020252	18189	Mm.491332	NM_020252	ENSMUSG00000024109	Nrxn1	1700062G21Rik|9330127H16Rik|A230068P09Rik|mKIAA0578	neurexin I	protein-coding
MACS_peak_10746	chr17	93007288	93007946	+	Intergenic	RLTR13D6|LTR|ERVK	-591145	NM_009625	11516	Mm.3407	NM_009625	ENSMUSG00000024256	Adcyap1	PACAP	adenylate cyclase activating polypeptide 1	protein-coding
MACS_peak_1075	chr1	119900288	119900981	+	Intergenic	RLTR13D6|LTR|ERVK	307075	NM_011650	22099	Mm.426637	NM_011650	ENSMUSG00000026374	Tsn	2610034C24Rik|AU040286|C3PO|TB-RBP	translin	protein-coding
MACS_peak_10751	chr17	93881571	93882331	+	Intergenic	RLTR25A|LTR|ERVK	283189	NM_009625	11516	Mm.3407	NM_009625	ENSMUSG00000024256	Adcyap1	PACAP	adenylate cyclase activating polypeptide 1	protein-coding
MACS_peak_10758	chr17	95047255	95047737	+	Intergenic	Intergenic	101736	NM_176917	76781	Mm.139146	NM_176917	ENSMUSG00000055660	Mettl4	2410198H06Rik|A730091E08Rik|AV296509|HsT661	methyltransferase like 4	protein-coding
MACS_peak_1076	chr1	119909232	119909784	+	Intergenic	RLTR46|LTR|ERVK	298201	NM_011650	22099	Mm.426637	NM_011650	ENSMUSG00000026374	Tsn	2610034C24Rik|AU040286|C3PO|TB-RBP	translin	protein-coding
MACS_peak_10760	chr17	95086538	95087319	+	Intergenic	LTRIS2|LTR|ERV1	62304	NM_176917	76781	Mm.139146	NM_176917	ENSMUSG00000055660	Mettl4	2410198H06Rik|A730091E08Rik|AV296509|HsT661	methyltransferase like 4	protein-coding
MACS_peak_10762	chr17	95128244	95128735	+	intron (NM_176917, intron 8 of 8)	ORR1A0|LTR|MaLR	20743	NM_176917	76781	Mm.139146	NM_176917	ENSMUSG00000055660	Mettl4	2410198H06Rik|A730091E08Rik|AV296509|HsT661	methyltransferase like 4	protein-coding
MACS_peak_1077	chr1	120047527	120048183	+	Intergenic	IAPEz-int|LTR|ERVK	159854	NM_011650	22099	Mm.426637	NM_011650	ENSMUSG00000026374	Tsn	2610034C24Rik|AU040286|C3PO|TB-RBP	translin	protein-coding
MACS_peak_10770	chr18	3157933	3158485	+	Intergenic	RLTR10C|LTR|ERVK	-34797	NM_001167539	100312476	Mm.480293	NM_001167539	ENSMUSG00000091539	Vmn1r238	-	vomeronasal 1 receptor, 238	protein-coding
MACS_peak_10771	chr18	3178795	3179170	+	Intergenic	ETnERV2-int|LTR|ERVK	-55570	NM_001167539	100312476	Mm.480293	NM_001167539	ENSMUSG00000091539	Vmn1r238	-	vomeronasal 1 receptor, 238	protein-coding
MACS_peak_10772	chr18	3350391	3350892	+	intron (NR_033457, intron 1 of 1)	ETnERV2-int|LTR|ERVK	-13054	NM_001110852	12916	Mm.5244	NM_013498	ENSMUSG00000063889	Crem	ICER|ICERI	cAMP responsive element modulator	protein-coding
MACS_peak_10778	chr18	3769558	3770031	+	Intergenic	Intergenic	261839	NM_026505	68010	Mm.284863	NM_026505	ENSMUSG00000024232	Bambi	2610003H06Rik	BMP and activin membrane-bound inhibitor	protein-coding
MACS_peak_10779	chr18	3822008	3822677	+	Intergenic	Intergenic	314387	NM_026505	68010	Mm.284863	NM_026505	ENSMUSG00000024232	Bambi	2610003H06Rik	BMP and activin membrane-bound inhibitor	protein-coding
MACS_peak_1078	chr1	120284889	120286041	+	promoter-TSS (NM_029709)	promoter-TSS (NM_029709)	-170	NM_001293300	76707	Mm.138740	NM_029709	ENSMUSG00000064302	Clasp1	1700030C23Rik|5730583A19Rik|B130045P17Rik|CLASP1alpha	CLIP associating protein 1	protein-coding
MACS_peak_10783	chr18	4405635	4406345	+	Intergenic	L1_Mur3|LINE|L1	30400	NM_026157	67440	Mm.49826	NM_026157	ENSMUSG00000024234	Mtpap	0610027A18Rik|AW551379|Papd1	mitochondrial poly(A) polymerase	protein-coding
MACS_peak_10784	chr18	4426796	4427565	+	Intergenic	MMETn-int|LTR|ERVK	51590	NM_026157	67440	Mm.49826	NM_026157	ENSMUSG00000024234	Mtpap	0610027A18Rik|AW551379|Papd1	mitochondrial poly(A) polymerase	protein-coding
MACS_peak_10788	chr18	4581416	4582196	+	Intergenic	RLTR13D6|LTR|ERVK	-53121	NM_001081963	240185	Mm.33179	NM_001081963	ENSMUSG00000033960	9430020K01Rik	1110056P05Rik|Gm328|Jcad|mKIAA1462	RIKEN cDNA 9430020K01 gene	protein-coding
MACS_peak_10793	chr18	5161957	5162325	+	Intergenic	Intergenic	115554	NM_153153	225115	Mm.136791	NM_153153	ENSMUSG00000024236	Svil	AU024053|B430302E16Rik	supervillin	protein-coding
MACS_peak_108	chr1	11491565	11492215	+	intron (NM_001160370, intron 1 of 6)	RLTR25A|LTR|ERVK	87704	NM_001160371	320492	Mm.52021	NM_177173	ENSMUSG00000057715	A830018L16Rik	-	RIKEN cDNA A830018L16 gene	protein-coding
MACS_peak_10801	chr18	6516568	6517261	+	promoter-TSS (NM_007935)	promoter-TSS (NM_007935)	-808	NM_007935	13831	Mm.312133	NM_007935	ENSMUSG00000024240	Epc1	2400007E14Rik|5730566F07Rik|A930032N02Rik	enhancer of polycomb homolog 1 (Drosophila)	protein-coding
MACS_peak_10802	chr18	6626708	6627369	+	intron (NM_027598, intron 6 of 9)	intron (NM_027598, intron 6 of 9)	23407	NM_027598	70901	Mm.158484	NM_027598	ENSMUSG00000039540	4921524L21Rik	-	RIKEN cDNA 4921524L21 gene	protein-coding
MACS_peak_10804	chr18	6741584	6742011	+	Intergenic	Intergenic	-23368	NM_181070	19330	Mm.132802	NM_181070		Rab18	AA959686	RAB18, member RAS oncogene family	protein-coding
MACS_peak_10813	chr18	7693726	7694135	+	Intergenic	L1M2|LINE|L1	-67069	NM_001161620	75739	Mm.133293	NM_001081287	ENSMUSG00000057440	Mpp7	1110068J02Rik|2810038M04Rik|5430426E14Rik|AI415104|Gm955	membrane protein, palmitoylated 7 (MAGUK p55 subfamily member 7)	protein-coding
MACS_peak_10814	chr18	7707950	7708387	+	Intergenic	Intergenic	-81307	NM_001161620	75739	Mm.133293	NM_001081287	ENSMUSG00000057440	Mpp7	1110068J02Rik|2810038M04Rik|5430426E14Rik|AI415104|Gm955	membrane protein, palmitoylated 7 (MAGUK p55 subfamily member 7)	protein-coding
MACS_peak_10816	chr18	7909411	7909823	+	intron (NM_001146298, intron 6 of 12)	(TTTC)n|Simple_repeat|Simple_repeat	40422	NM_153085	225131	Mm.204524	NM_153085	ENSMUSG00000024283	Wac	1110067P07Rik|A230035H12Rik|AI256735|AI256776|Wwp4	WW domain containing adaptor with coiled-coil	protein-coding
MACS_peak_1082	chr1	120521876	120522671	+	Intergenic	Intergenic	-2249	NM_023755	81879	Mm.24621	NM_023755	ENSMUSG00000026380	Tfcp2l1	1810030F05Rik|4932442M07Rik|AA575098|Cp2l1|Crtr-1|D930018N21Rik|LBP-9|Tcfcp2l1	transcription factor CP2-like 1	protein-coding
MACS_peak_10820	chr18	8136741	8137356	+	Intergenic	RLTR13D6|LTR|ERVK	267853	NM_153085	225131	Mm.204524	NM_153085	ENSMUSG00000024283	Wac	1110067P07Rik|A230035H12Rik|AI256735|AI256776|Wwp4	WW domain containing adaptor with coiled-coil	protein-coding
MACS_peak_10821	chr18	8193959	8194566	+	Intergenic	RLTR13D6|LTR|ERVK	325067	NM_153085	225131	Mm.204524	NM_153085	ENSMUSG00000024283	Wac	1110067P07Rik|A230035H12Rik|AI256735|AI256776|Wwp4	WW domain containing adaptor with coiled-coil	protein-coding
MACS_peak_10822	chr18	8418299	8418857	+	Intergenic	MMETn-int|LTR|ERVK	549383	NM_153085	225131	Mm.204524	NM_153085	ENSMUSG00000024283	Wac	1110067P07Rik|A230035H12Rik|AI256735|AI256776|Wwp4	WW domain containing adaptor with coiled-coil	protein-coding
MACS_peak_10823	chr18	8524058	8524578	+	Intergenic	Intergenic	655123	NM_153085	225131	Mm.204524	NM_153085	ENSMUSG00000024283	Wac	1110067P07Rik|A230035H12Rik|AI256735|AI256776|Wwp4	WW domain containing adaptor with coiled-coil	protein-coding
MACS_peak_10825	chr18	8860209	8860667	+	Intergenic	MMETn-int|LTR|ERVK	-352416	NM_008058	14370	Mm.184289	NM_008058	ENSMUSG00000036904	Fzd8	Fz8	frizzled homolog 8 (Drosophila)	protein-coding
MACS_peak_10827	chr18	9197310	9197779	+	Intergenic	RLTR9A|LTR|ERVK	-15310	NM_008058	14370	Mm.184289	NM_008058	ENSMUSG00000036904	Fzd8	Fz8	frizzled homolog 8 (Drosophila)	protein-coding
MACS_peak_10829	chr18	9214884	9215412	+	3' UTR (NM_008058, exon 1 of 1)	3' UTR (NM_008058, exon 1 of 1)	2294	NM_008058	14370	Mm.184289	NM_008058	ENSMUSG00000036904	Fzd8	Fz8	frizzled homolog 8 (Drosophila)	protein-coding
MACS_peak_1083	chr1	120522738	120523390	+	Intergenic	Intergenic	-1458	NM_023755	81879	Mm.24621	NM_023755	ENSMUSG00000026380	Tfcp2l1	1810030F05Rik|4932442M07Rik|AA575098|Cp2l1|Crtr-1|D930018N21Rik|LBP-9|Tcfcp2l1	transcription factor CP2-like 1	protein-coding
MACS_peak_10830	chr18	9450180	9450606	+	promoter-TSS (NM_026484)	promoter-TSS (NM_026484)	-245	NM_026484	67974	Mm.86523	NM_026484	ENSMUSG00000024286	Ccny	1700025H17Rik|3110050L10Rik|4631402G10Rik|5730405I09Rik	cyclin Y	protein-coding
MACS_peak_1084	chr1	120530195	120530612	+	intron (NM_023755, intron 2 of 14)	intron (NM_023755, intron 2 of 14)	5881	NM_023755	81879	Mm.24621	NM_023755	ENSMUSG00000026380	Tfcp2l1	1810030F05Rik|4932442M07Rik|AA575098|Cp2l1|Crtr-1|D930018N21Rik|LBP-9|Tcfcp2l1	transcription factor CP2-like 1	protein-coding
MACS_peak_10841	chr18	9958395	9959006	+	intron (NM_153552, intron 1 of 20)	intron (NM_153552, intron 1 of 20)	522	NM_153552	225160	Mm.219648	NM_153552	ENSMUSG00000024287	Thoc1	3110002N20Rik|AW107452|NMP-84	THO complex 1	protein-coding
MACS_peak_10845	chr18	10617422	10617976	+	promoter-TSS (NM_009226)	promoter-TSS (NM_009226)	-95	NM_009226	20641	Mm.603	NM_009226	ENSMUSG00000002477	Snrpd1	AA407109|AL023031|SMD1	small nuclear ribonucleoprotein D1	protein-coding
MACS_peak_10849	chr18	11645334	11646053	+	Intergenic	Intergenic	-146092	NM_001252495	225182	Mm.154275	NM_175458	ENSMUSG00000041238	Rbbp8	9930104E21Rik|CtIP|RBBP-8|RIM|SAE2	retinoblastoma binding protein 8	protein-coding
MACS_peak_1085	chr1	120538862	120539688	+	intron (NM_023755, intron 2 of 14)	intron (NM_023755, intron 2 of 14)	14753	NM_023755	81879	Mm.24621	NM_023755	ENSMUSG00000026380	Tfcp2l1	1810030F05Rik|4932442M07Rik|AA575098|Cp2l1|Crtr-1|D930018N21Rik|LBP-9|Tcfcp2l1	transcription factor CP2-like 1	protein-coding
MACS_peak_10852	chr18	12046641	12047045	+	intron (NM_022021, intron 2 of 8)	intron (NM_022021, intron 2 of 8)	-47896	NR_035447	100316686		NR_035447	miRBase:MI0008328	Mir1901	Mirn1901|mmu-mir-1901	microRNA 1901	ncRNA
MACS_peak_1086	chr1	120543984	120545285	+	intron (NM_023755, intron 2 of 14)	intron (NM_023755, intron 2 of 14)	20112	NM_023755	81879	Mm.24621	NM_023755	ENSMUSG00000026380	Tfcp2l1	1810030F05Rik|4932442M07Rik|AA575098|Cp2l1|Crtr-1|D930018N21Rik|LBP-9|Tcfcp2l1	transcription factor CP2-like 1	protein-coding
MACS_peak_10865	chr18	13045430	13046158	+	intron (NM_207530, intron 13 of 27)	intron (NM_207530, intron 13 of 27)	-7306	NM_001252489	64291	Mm.259470	NM_020573	ENSMUSG00000044252	Osbpl1a	G430090F17Rik|Gm753|ORP-1|Osbpl1b	oxysterol binding protein-like 1A	protein-coding
MACS_peak_10868	chr18	13878133	13878684	+	intron (NM_145492, intron 5 of 7)	intron (NM_145492, intron 5 of 7)	252834	NM_145492	225207	Mm.40325	NM_145492	ENSMUSG00000024420	Zfp521	B930086A16Rik|Evi3|Znf521	zinc finger protein 521	protein-coding
MACS_peak_10869	chr18	13898560	13899005	+	intron (NM_145492, intron 5 of 7)	intron (NM_145492, intron 5 of 7)	232460	NM_145492	225207	Mm.40325	NM_145492	ENSMUSG00000024420	Zfp521	B930086A16Rik|Evi3|Znf521	zinc finger protein 521	protein-coding
MACS_peak_1087	chr1	120559703	120560069	+	intron (NM_023755, intron 8 of 14)	intron (NM_023755, intron 8 of 14)	35364	NM_023755	81879	Mm.24621	NM_023755	ENSMUSG00000026380	Tfcp2l1	1810030F05Rik|4932442M07Rik|AA575098|Cp2l1|Crtr-1|D930018N21Rik|LBP-9|Tcfcp2l1	transcription factor CP2-like 1	protein-coding
MACS_peak_10872	chr18	14131018	14131343	+	promoter-TSS (NM_145492)	promoter-TSS (NM_145492)	62	NM_145492	225207	Mm.40325	NM_145492	ENSMUSG00000024420	Zfp521	B930086A16Rik|Evi3|Znf521	zinc finger protein 521	protein-coding
MACS_peak_10873	chr18	14414676	14415264	+	intron (NR_045373, intron 2 of 3)	intron (NR_045373, intron 2 of 3)	24155	NR_045373	74529	Mm.400519	NR_045373		8430422H06Rik	-	RIKEN cDNA 8430422H06 gene	ncRNA
MACS_peak_10874	chr18	14670566	14671026	+	Intergenic	B3A|SINE|B2	170627	NM_001161369	268996	Mm.31761	NM_009280	ENSMUSG00000037013	Ss18	D130059H17|Ssxt|Syt	synovial sarcoma translocation, Chromosome 18	protein-coding
MACS_peak_10877	chr18	14822692	14823243	+	intron (NM_001161370, intron 3 of 9)	intron (NM_001161370, intron 3 of 9)	18456	NM_001161369	268996	Mm.31761	NM_009280	ENSMUSG00000037013	Ss18	D130059H17|Ssxt|Syt	synovial sarcoma translocation, Chromosome 18	protein-coding
MACS_peak_10878	chr18	14832828	14833417	+	intron (NM_001161370, intron 2 of 9)	intron (NM_001161370, intron 2 of 9)	8301	NM_001161369	268996	Mm.31761	NM_009280	ENSMUSG00000037013	Ss18	D130059H17|Ssxt|Syt	synovial sarcoma translocation, Chromosome 18	protein-coding
MACS_peak_10889	chr18	16102295	16102745	+	Intergenic	RLTR10|LTR|ERVK	-225965	NM_199055	71367	Mm.329304	NM_199055	ENSMUSG00000047161	Chst9	5430438D01Rik	carbohydrate (N-acetylgalactosamine 4-0) sulfotransferase 9	protein-coding
MACS_peak_1089	chr1	120672876	120673752	+	Intergenic	Intergenic	148792	NM_023755	81879	Mm.24621	NM_023755	ENSMUSG00000026380	Tfcp2l1	1810030F05Rik|4932442M07Rik|AA575098|Cp2l1|Crtr-1|D930018N21Rik|LBP-9|Tcfcp2l1	transcription factor CP2-like 1	protein-coding
MACS_peak_10892	chr18	16649041	16649708	+	Intergenic	RLTR25B|LTR|ERVK	318184	NM_007664	12558	Mm.257437	NM_007664	ENSMUSG00000024304	Cdh2	CDHN|N-cadherin|Ncad	cadherin 2	protein-coding
MACS_peak_10893	chr18	16828468	16828900	+	intron (NM_007664, intron 2 of 15)	intron (NM_007664, intron 2 of 15)	138874	NM_007664	12558	Mm.257437	NM_007664	ENSMUSG00000024304	Cdh2	CDHN|N-cadherin|Ncad	cadherin 2	protein-coding
MACS_peak_10896	chr18	17440680	17441469	+	Intergenic	RLTR11B|LTR|ERVK	-47083	NR_033607	664619	Mm.250005	NR_033607		4921533I20Rik	-	PRP18 pre-mRNA processing factor 18 homolog pseudogene	pseudo
MACS_peak_10901	chr18	17770833	17771454	+	Intergenic	L2a|LINE|L2	-31644	NR_045374	75162	Mm.60874	NR_045374		4930545E07Rik	-	RIKEN cDNA 4930545E07 gene	ncRNA
MACS_peak_10902	chr18	17987762	17988336	+	Intergenic	RMER16-int|LTR|ERVK	-248550	NR_045374	75162	Mm.60874	NR_045374		4930545E07Rik	-	RIKEN cDNA 4930545E07 gene	ncRNA
MACS_peak_10906	chr18	18367368	18368044	+	Intergenic	BGLII|LTR|ERVK	-628207	NR_045374	75162	Mm.60874	NR_045374		4930545E07Rik	-	RIKEN cDNA 4930545E07 gene	ncRNA
MACS_peak_10907	chr18	18769425	18770047	+	Intergenic	RLTR13D6|LTR|ERVK	-1030237	NR_045374	75162	Mm.60874	NR_045374		4930545E07Rik	-	RIKEN cDNA 4930545E07 gene	ncRNA
MACS_peak_1091	chr1	120930743	120931223	+	intron (NM_001081125, intron 1 of 13)	intron (NM_001081125, intron 1 of 13)	19213	NM_001081125	14633	Mm.273292	NM_001081125	ENSMUSG00000048402	Gli2	AW546128	GLI-Kruppel family member GLI2	protein-coding
MACS_peak_10912	chr18	19205680	19206060	+	Intergenic	RLTR13D6|LTR|ERVK	954728	NM_007882	13507	Mm.89935	NM_007882	ENSMUSG00000059898	Dsc3	5430426I24Rik	desmocollin 3	protein-coding
MACS_peak_10913	chr18	19221725	19222614	+	Intergenic	RLTR13D6|LTR|ERVK	938429	NM_007882	13507	Mm.89935	NM_007882	ENSMUSG00000059898	Dsc3	5430426I24Rik	desmocollin 3	protein-coding
MACS_peak_10917	chr18	19916206	19916840	+	Intergenic	ETnERV2-int|LTR|ERVK	244075	NM_007882	13507	Mm.89935	NM_007882	ENSMUSG00000059898	Dsc3	5430426I24Rik	desmocollin 3	protein-coding
MACS_peak_1092	chr1	120945431	120946184	+	intron (NM_001081125, intron 1 of 13)	intron (NM_001081125, intron 1 of 13)	4389	NM_001081125	14633	Mm.273292	NM_001081125	ENSMUSG00000048402	Gli2	AW546128	GLI-Kruppel family member GLI2	protein-coding
MACS_peak_10922	chr18	20875092	20875590	+	intron (NM_019737, intron 3 of 8)	intron (NM_019737, intron 3 of 8)	29564	NM_019737	56386	Mm.393827	NM_019737	ENSMUSG00000056124	B4galt6	AA536803|AU022389	UDP-Gal:betaGlcNAc beta 1,4-galactosyltransferase, polypeptide 6	protein-coding
MACS_peak_10923	chr18	20896767	20897150	+	intron (NM_019737, intron 1 of 8)	intron (NM_019737, intron 1 of 8)	7947	NM_019737	56386	Mm.393827	NM_019737	ENSMUSG00000056124	B4galt6	AA536803|AU022389	UDP-Gal:betaGlcNAc beta 1,4-galactosyltransferase, polypeptide 6	protein-coding
MACS_peak_10924	chr18	20908089	20908668	+	Intergenic	Intergenic	-3473	NM_019737	56386	Mm.393827	NM_019737	ENSMUSG00000056124	B4galt6	AA536803|AU022389	UDP-Gal:betaGlcNAc beta 1,4-galactosyltransferase, polypeptide 6	protein-coding
MACS_peak_10926	chr18	20935264	20936120	+	Intergenic	LTRIS2|LTR|ERV1	-30787	NM_019737	56386	Mm.393827	NM_019737	ENSMUSG00000056124	B4galt6	AA536803|AU022389	UDP-Gal:betaGlcNAc beta 1,4-galactosyltransferase, polypeptide 6	protein-coding
MACS_peak_10928	chr18	21081215	21082039	+	Intergenic	Intergenic	-21499	NM_026301	67664	Mm.45980	NM_026301	ENSMUSG00000033107	Rnf125	4930553F04Rik	ring finger protein 125	protein-coding
MACS_peak_10929	chr18	21101908	21102759	+	promoter-TSS (NM_026301)	promoter-TSS (NM_026301)	-793	NM_026301	67664	Mm.45980	NM_026301	ENSMUSG00000033107	Rnf125	4930553F04Rik	ring finger protein 125	protein-coding
MACS_peak_1093	chr1	120972390	120973181	+	Intergenic	Intergenic	-22589	NM_001081125	14633	Mm.273292	NM_001081125	ENSMUSG00000048402	Gli2	AW546128	GLI-Kruppel family member GLI2	protein-coding
MACS_peak_10930	chr18	21104023	21104607	+	intron (NM_026301, intron 1 of 5)	intron (NM_026301, intron 1 of 5)	1189	NM_026301	67664	Mm.45980	NM_026301	ENSMUSG00000033107	Rnf125	4930553F04Rik	ring finger protein 125	protein-coding
MACS_peak_10933	chr18	21201569	21202253	+	Intergenic	LTRIS2|LTR|ERV1	-28934	NM_008586	17288	Mm.2682	NM_008586	ENSMUSG00000024313	Mep1b	Mep-1b	meprin 1 beta	protein-coding
MACS_peak_10935	chr18	21242402	21243121	+	intron (NM_008586, intron 6 of 14)	intron (NM_008586, intron 6 of 14)	11916	NM_008586	17288	Mm.2682	NM_008586	ENSMUSG00000024313	Mep1b	Mep-1b	meprin 1 beta	protein-coding
MACS_peak_10938	chr18	21580257	21581047	+	Intergenic	RLTR17|LTR|ERVK	-122012	NM_001033445	381126	Mm.312276	NM_001033445	ENSMUSG00000042680	Garem	C86169|Fam59a|Gm944|mKIAA4238	GRB2 associated, regulator of MAPK1	protein-coding
MACS_peak_1094	chr1	121044072	121044648	+	Intergenic	MTD|LTR|MaLR	-94164	NM_001081125	14633	Mm.273292	NM_001081125	ENSMUSG00000048402	Gli2	AW546128	GLI-Kruppel family member GLI2	protein-coding
MACS_peak_10942	chr18	22482772	22483071	+	Intergenic	MTA_Mm|LTR|MaLR	-20669	NM_001167777	211961	Mm.392310	NM_001167777	ENSMUSG00000045215	Asxl3	C230079D11Rik|D430002O22Rik|D930044O18Rik|Gm329|Gm945	additional sex combs like 3 (Drosophila)	protein-coding
MACS_peak_10943	chr18	22483315	22484138	+	Intergenic	MMETn-int|LTR|ERVK	-19864	NM_001167777	211961	Mm.392310	NM_001167777	ENSMUSG00000045215	Asxl3	C230079D11Rik|D430002O22Rik|D930044O18Rik|Gm329|Gm945	additional sex combs like 3 (Drosophila)	protein-coding
MACS_peak_10944	chr18	22539529	22540043	+	intron (NM_001167777, intron 2 of 12)	intron (NM_001167777, intron 2 of 12)	36196	NM_001167777	211961	Mm.392310	NM_001167777	ENSMUSG00000045215	Asxl3	C230079D11Rik|D430002O22Rik|D930044O18Rik|Gm329|Gm945	additional sex combs like 3 (Drosophila)	protein-coding
MACS_peak_10947	chr18	23568846	23569253	+	intron (NM_001285813, intron 1 of 21)	B3A|SINE|B2	-4861	NM_010087	13527	Mm.94371	NM_010087	ENSMUSG00000024302	Dtna	2210407P21Rik|DTN-A|Dtn|Gm19389|a-DB-1|adbn	dystrobrevin alpha	protein-coding
MACS_peak_10949	chr18	23673848	23674336	+	intron (NM_001285807, intron 3 of 24)	B1F|SINE|Alu	18109	NM_001285810	13527	Mm.94371	NM_010087	ENSMUSG00000024302	Dtna	2210407P21Rik|DTN-A|Dtn|Gm19389|a-DB-1|adbn	dystrobrevin alpha	protein-coding
MACS_peak_1095	chr1	121053771	121054423	+	Intergenic	Intergenic	-103901	NM_001081125	14633	Mm.273292	NM_001081125	ENSMUSG00000048402	Gli2	AW546128	GLI-Kruppel family member GLI2	protein-coding
MACS_peak_10950	chr18	23700853	23701356	+	intron (NM_001285807, intron 4 of 24)	MER67D|LTR|ERV1	45121	NM_001285810	13527	Mm.94371	NM_010087	ENSMUSG00000024302	Dtna	2210407P21Rik|DTN-A|Dtn|Gm19389|a-DB-1|adbn	dystrobrevin alpha	protein-coding
MACS_peak_10951	chr18	23865622	23866202	+	Intergenic	Intergenic	-44922	NM_001162942	212307	Mm.132237	NM_153058	ENSMUSG00000024277	Mapre2	AI314113|C820009F03Rik|D18Abb1e|EB1|EB2|RP1	microtubule-associated protein, RP/EB family, member 2	protein-coding
MACS_peak_10952	chr18	24152002	24152673	+	intron (NM_011755, intron 2 of 2)	intron (NM_011755, intron 2 of 2)	4202	NM_011755	22694	Mm.290596	NM_011755	ENSMUSG00000063281	Zfp35	Zfp-35|Znf271|mszf13|mszf20-1|mszf28|mszf68	zinc finger protein 35	protein-coding
MACS_peak_10956	chr18	24228442	24229554	+	Intergenic	RLTR13D1|LTR|ERVK	-49726	NM_021559	59057	Mm.417427	NM_021559		Zfp191	3526401F17Rik|5033419P20Rik|AI480505|AI642085|AL024422|KOX17|ZF-12|Znf191|Znf24|Znp191	zinc finger protein 191	protein-coding
MACS_peak_10959	chr18	24533650	24534450	+	Intergenic	RLTR11A|LTR|ERVK	53621	NR_029573	387182		NR_029573	miRBase:MI0000229	Mir187	Mirn187|mmu-mir-187	microRNA 187	ncRNA
MACS_peak_10960	chr18	24541097	24541473	+	Intergenic	ORR1D1|LTR|MaLR	46386	NR_029573	387182		NR_029573	miRBase:MI0000229	Mir187	Mirn187|mmu-mir-187	microRNA 187	ncRNA
MACS_peak_10962	chr18	24552488	24553417	+	Intergenic	MER34A|LTR|ERV1	34719	NR_029573	387182		NR_029573	miRBase:MI0000229	Mir187	Mirn187|mmu-mir-187	microRNA 187	ncRNA
MACS_peak_10963	chr18	24560433	24561305	+	Intergenic	Intergenic	26802	NR_029573	387182		NR_029573	miRBase:MI0000229	Mir187	Mirn187|mmu-mir-187	microRNA 187	ncRNA
MACS_peak_10966	chr18	24674414	24674893	+	intron (NM_144861, intron 1 of 6)	intron (NM_144861, intron 1 of 6)	14052	NM_144861	225283	Mm.28427	NM_144861	ENSMUSG00000040446	Rprd1a	C77387|mKIAA4077	regulation of nuclear pre-mRNA domain containing 1A	protein-coding
MACS_peak_10968	chr18	24788088	24788735	+	intron (NM_021448, intron 17 of 21)	intron (NM_021448, intron 17 of 21)	-23781	NM_026779	68591	Mm.28252	NM_026779	ENSMUSG00000039616	Mocos	1110018O12Rik|HMCS|MCS|MOS	molybdenum cofactor sulfurase	protein-coding
MACS_peak_10970	chr18	24974313	24975081	+	intron (NM_001289654, intron 3 of 24)	intron (NM_001289654, intron 3 of 24)	107573	NM_001289655	225288	Mm.329322	NM_175276	ENSMUSG00000034295	Fhod3	A930009H06Rik|FHOS2|mKIAA1695	formin homology 2 domain containing 3	protein-coding
MACS_peak_10973	chr18	25547847	25548408	+	intron (NM_001033532, intron 8 of 10)	RLTR25A|LTR|ERVK	220606	NM_001033532	225289	Mm.391081	NM_001033532	ENSMUSG00000033632	AW554918	4921538P22|AI461742|Kiaa1328|mKIAA1328	expressed sequence AW554918	protein-coding
MACS_peak_10974	chr18	25560996	25561424	+	intron (NM_001033532, intron 9 of 10)	RLTR13D6|LTR|ERVK	233689	NM_001033532	225289	Mm.391081	NM_001033532	ENSMUSG00000033632	AW554918	4921538P22|AI461742|Kiaa1328|mKIAA1328	expressed sequence AW554918	protein-coding
MACS_peak_10975	chr18	25585569	25586114	+	intron (NM_001033532, intron 10 of 10)	RLTR11A|LTR|ERVK	258320	NM_001033532	225289	Mm.391081	NM_001033532	ENSMUSG00000033632	AW554918	4921538P22|AI461742|Kiaa1328|mKIAA1328	expressed sequence AW554918	protein-coding
MACS_peak_10979	chr18	25843992	25844433	+	intron (NM_001146295, intron 1 of 1)	intron (NM_001146295, intron 1 of 1)	68272	NM_133195	108013	Mm.266435	NM_133195	ENSMUSG00000024268	Celf4	A230070D14Rik|BRUNOL-4|Brul4|Brunol4|C130060B05Rik	CUGBP, Elav-like family member 4	protein-coding
MACS_peak_10980	chr18	26157828	26158117	+	Intergenic	Intergenic	-245488	NM_001174074	108013	Mm.266435	NM_133195	ENSMUSG00000024268	Celf4	A230070D14Rik|BRUNOL-4|Brul4|Brunol4|C130060B05Rik	CUGBP, Elav-like family member 4	protein-coding
MACS_peak_10983	chr18	26704747	26705377	+	Intergenic	RLTR9E|LTR|ERVK	-792578	NM_001174074	108013	Mm.266435	NM_133195	ENSMUSG00000024268	Celf4	A230070D14Rik|BRUNOL-4|Brul4|Brunol4|C130060B05Rik	CUGBP, Elav-like family member 4	protein-coding
MACS_peak_10984	chr18	26868458	26869112	+	Intergenic	Intergenic	-956301	NM_001174074	108013	Mm.266435	NM_133195	ENSMUSG00000024268	Celf4	A230070D14Rik|BRUNOL-4|Brul4|Brunol4|C130060B05Rik	CUGBP, Elav-like family member 4	protein-coding
MACS_peak_10985	chr18	26869548	26870117	+	Intergenic	Intergenic	-957348	NM_001174074	108013	Mm.266435	NM_133195	ENSMUSG00000024268	Celf4	A230070D14Rik|BRUNOL-4|Brul4|Brunol4|C130060B05Rik	CUGBP, Elav-like family member 4	protein-coding
MACS_peak_10989	chr18	27673602	27674003	+	Intergenic	Intergenic	-1044863	NR_045398	320624	Mm.50107	NR_045398		4930474G06Rik	-	RIKEN cDNA 4930474G06 gene	ncRNA
MACS_peak_10994	chr18	28680739	28681335	+	Intergenic	Intergenic	-37628	NR_045398	320624	Mm.50107	NR_045398		4930474G06Rik	-	RIKEN cDNA 4930474G06 gene	ncRNA
MACS_peak_11	chr1	3971652	3972609	+	Intergenic	ETnERV2-int|LTR|ERVK	-310551	NM_001011874	497097	Mm.454496	NM_001011874	ENSMUSG00000051951	Xkr4	AY534250|Gm210|XRG4|mKIAA1889	X Kell blood group precursor related family member 4	protein-coding
MACS_peak_1100	chr1	121231561	121231895	+	Intergenic	Lx7|LINE|L1	87097	NM_008381	16324	Mm.3092	NM_008381	ENSMUSG00000037035	Inhbb	-	inhibin beta-B	protein-coding
MACS_peak_11005	chr18	30280766	30281920	+	Intergenic	Intergenic	-151207	NM_181414	225326	Mm.194127	NM_181414	ENSMUSG00000033628	Pik3c3	5330434F23Rik|Vps34	phosphoinositide-3-kinase, class 3	protein-coding
MACS_peak_11008	chr18	30896465	30897003	+	Intergenic	Intergenic	464184	NM_181414	225326	Mm.194127	NM_181414	ENSMUSG00000033628	Pik3c3	5330434F23Rik|Vps34	phosphoinositide-3-kinase, class 3	protein-coding
MACS_peak_11009	chr18	31237285	31237669	+	intron (NM_009065, intron 4 of 4)	intron (NM_009065, intron 4 of 4)	239305	NM_009065	19762	Mm.5163	NM_009065	ENSMUSG00000057455	Rit2	RIBA|Rin|Roc2	Ras-like without CAAX 2	protein-coding
MACS_peak_11011	chr18	31413324	31413979	+	intron (NM_009065, intron 1 of 4)	intron (NM_009065, intron 1 of 4)	63131	NM_009065	19762	Mm.5163	NM_009065	ENSMUSG00000057455	Rit2	RIBA|Rin|Roc2	Ras-like without CAAX 2	protein-coding
MACS_peak_11014	chr18	31727735	31728316	+	Intergenic	RLTR1B|LTR|ERV1	41531	NM_026165	67453	Mm.23896	NM_026165	ENSMUSG00000024259	Slc25a46	1200007B05Rik|AI325987	solute carrier family 25, member 46	protein-coding
MACS_peak_11025	chr18	33571963	33572479	+	Intergenic	MLT1A0|LTR|MaLR	51067	NM_001267717	27528	Mm.407415	NM_053078	ENSMUSG00000042834	Nrep	AI325076|D0H4S114|Harp|P311|PTZ17|SEZ17	neuronal regeneration related protein	protein-coding
MACS_peak_11027	chr18	33954137	33954782	+	promoter-TSS (NR_038151)	promoter-TSS (NR_038151)	-87	NR_038152	69749	Mm.248787	NR_038151	ENSMUSG00000087590	2410004N09Rik	-	RIKEN cDNA 2410004N09 gene	ncRNA
MACS_peak_11030	chr18	33995370	33996101	+	intron (NM_013512, intron 13 of 23)	intron (NM_013512, intron 13 of 23)	41189	NR_038151	69749	Mm.248787	NR_038151	ENSMUSG00000087590	2410004N09Rik	-	RIKEN cDNA 2410004N09 gene	ncRNA
MACS_peak_11037	chr18	34252530	34253410	+	Intergenic	Intergenic	-86110	NM_013512	13824	Mm.3465	NM_013512	ENSMUSG00000024376	Epb4.1l4a	Epb4.1l4|Epb41l4a|NBL4	erythrocyte protein band 4.1-like 4a	protein-coding
MACS_peak_1104	chr1	121293664	121294070	+	Intergenic	ID_B1|SINE|B4	24958	NM_008381	16324	Mm.3092	NM_008381	ENSMUSG00000037035	Inhbb	-	inhibin beta-B	protein-coding
MACS_peak_11043	chr18	34533259	34533650	+	promoter-TSS (NM_007874)	promoter-TSS (NM_007874)	-385	NM_007874	13476	Mm.280075	NM_007874	ENSMUSG00000005873	Reep5	AI324241|AU022809|AW495741|DP1/TB2|Dp1|R74856|TB2/DP1	receptor accessory protein 5	protein-coding
MACS_peak_11045	chr18	34611466	34611984	+	intron (NM_146084, intron 14 of 20)	intron (NM_146084, intron 14 of 20)	42648	NM_016927	53871	Mm.445792	NM_016927	ENSMUSG00000014503	Pkd2l2	TRPP5	polycystic kidney disease 2-like 2	protein-coding
MACS_peak_11046	chr18	34630744	34631506	+	intron (NM_146084, intron 8 of 20)	BGLII|LTR|ERVK	35352	NM_146084	225358	Mm.226899	NM_146084	ENSMUSG00000036501	Fam13b	2610024E20Rik|AW060714|AW546153	family with sequence similarity 13, member B	protein-coding
MACS_peak_11047	chr18	34701493	34701993	+	promoter-TSS (NM_009290)	promoter-TSS (NM_009290)	-239	NM_009290	20890	Mm.558	NM_009290	ENSMUSG00000012282	Wnt8a	Stra11|Wnt-8A|Wnt-8D|Wnt8d	wingless-type MMTV integration site family, member 8A	protein-coding
MACS_peak_11048	chr18	34711238	34711842	+	Intergenic	Intergenic	9558	NM_009290	20890	Mm.558	NM_009290	ENSMUSG00000012282	Wnt8a	Stra11|Wnt-8A|Wnt-8D|Wnt8d	wingless-type MMTV integration site family, member 8A	protein-coding
MACS_peak_11050	chr18	34938023	34939259	+	intron (NM_001081256, intron 1 of 23)	intron (NM_001081256, intron 1 of 23)	1979	NM_001081256	277250	Mm.277906	NM_029518	ENSMUSG00000038773	Kdm3b	5830462I21Rik|JHDM2B|Jmjd1b|mKIAA1082	KDM3B lysine (K)-specific demethylase 3B	protein-coding
MACS_peak_11052	chr18	35009654	35010127	+	Intergenic	Intergenic	9647	NM_144865	225362	Mm.293588	NM_144865	ENSMUSG00000038555	Reep2	-	receptor accessory protein 2	protein-coding
MACS_peak_11054	chr18	35225267	35225749	+	Intergenic	RMER6C|LTR|ERVK	-53058	NM_009818	12385	Mm.18962	NM_009818	ENSMUSG00000037815	Ctnna1	2010010M04Rik|AA517462|AI988031|Catna1	catenin (cadherin associated protein), alpha 1	protein-coding
MACS_peak_11055	chr18	35297495	35298135	+	intron (NM_009818, intron 1 of 17)	intron (NM_009818, intron 1 of 17)	19249	NM_009818	12385	Mm.18962	NM_009818	ENSMUSG00000037815	Ctnna1	2010010M04Rik|AA517462|AI988031|Catna1	catenin (cadherin associated protein), alpha 1	protein-coding
MACS_peak_11057	chr18	35614640	35615122	+	intron (NM_030749, intron 1 of 9)	intron (NM_030749, intron 1 of 9)	43698	NM_030749	81500	Mm.291482	NM_030749	ENSMUSG00000024357	Sil1	1810057E01Rik|AI042831|wz	endoplasmic reticulum chaperone SIL1 homolog (S. cerevisiae)	protein-coding
MACS_peak_11058	chr18	35627330	35627747	+	intron (NM_030749, intron 1 of 9)	intron (NM_030749, intron 1 of 9)	31041	NM_030749	81500	Mm.291482	NM_030749	ENSMUSG00000024357	Sil1	1810057E01Rik|AI042831|wz	endoplasmic reticulum chaperone SIL1 homolog (S. cerevisiae)	protein-coding
MACS_peak_11060	chr18	35699585	35700216	+	Intergenic	Intergenic	-13164	NR_038073	100503380	Mm.482118	NR_038073	ENSMUSG00000097769	Snhg4	Gm17457	small nucleolar RNA host gene 4	ncRNA
MACS_peak_11061	chr18	35701964	35702632	+	Intergenic	RSINE1|SINE|B4	-10766	NR_038073	100503380	Mm.482118	NR_038073	ENSMUSG00000097769	Snhg4	Gm17457	small nucleolar RNA host gene 4	ncRNA
MACS_peak_11062	chr18	35715659	35716213	+	promoter-TSS (NR_002905)	promoter-TSS (NR_002905)	-748	NR_002905	436583	Mm.482118	NR_002905	ENSMUSG00000065649	Snora74a	EG436583|RNU19|U19	small nucleolar RNA, H/ACA box 74A	snoRNA
MACS_peak_11063	chr18	35762903	35763292	+	intron (NM_026420, intron 1 of 3)	B1_Mm|SINE|Alu	4776	NM_026420	67869	Mm.126534	NM_026420	ENSMUSG00000037058	Paip2	2310050K10Rik|AU045972	polyadenylate-binding protein-interacting protein 2	protein-coding
MACS_peak_11065	chr18	35799890	35800471	+	Intergenic	MMETn-int|LTR|ERVK	8841	NM_027222	69816	Mm.27252	NM_027222	ENSMUSG00000024353	Mzb1	2010001M09Rik|AV064572|PACAP|pERp1	marginal zone B and B1 cell-specific protein 1	protein-coding
MACS_peak_11067	chr18	35930486	35931132	+	promoter-TSS (NM_019912)	promoter-TSS (NM_019912)	-404	NM_019912	56550	Mm.180052	NM_019912	ENSMUSG00000091896	Ube2d2a	1500034D03Rik|Ubc2e|Ube2d2|ubc4	ubiquitin-conjugating enzyme E2D 2A	protein-coding
MACS_peak_11070	chr18	36008147	36008545	+	intron (NM_133687, intron 1 of 2)	intron (NM_133687, intron 1 of 2)	18874	NM_133687	67393	Mm.94560	NM_133687	ENSMUSG00000046668	Cxxc5	4930415K17Rik	CXXC finger 5	protein-coding
MACS_peak_11072	chr18	36112598	36113060	+	Intergenic	B2_Mm2|SINE|B2	-11655	NM_028707	74002	Mm.196944	NM_028707	ENSMUSG00000024347	Psd2	6330404E20Rik|AW125584|EFA6C	pleckstrin and Sec7 domain containing 2	protein-coding
MACS_peak_11073	chr18	36356960	36357554	+	promoter-TSS (NM_001167891)	promoter-TSS (NM_001167891)	-443	NM_001167891	100042150	Mm.380390	NM_001167891	ENSMUSG00000060275	Nrg2	Don1|NTAK	neuregulin 2	protein-coding
MACS_peak_11075	chr18	36434536	36435102	+	Intergenic	Intergenic	-5997	NM_008989	19290	Mm.231802	NM_008989		Pura	CAGER-1|Pur-alpha|ssCRE-BP	purine rich element binding protein A	protein-coding
MACS_peak_11078	chr18	36569306	36569991	+	intron (NM_026027, intron 3 of 3)	B1_Mus2|SINE|Alu	44501	NM_026027	67199	Mm.30184	NM_026027	ENSMUSG00000024346	Pfdn1	2700086I23Rik|AA408327|AU044714	prefoldin 1	protein-coding
MACS_peak_11079	chr18	36575057	36575728	+	intron (NM_026027, intron 3 of 3)	intron (NM_026027, intron 3 of 3)	38757	NM_026027	67199	Mm.30184	NM_026027	ENSMUSG00000024346	Pfdn1	2700086I23Rik|AA408327|AU044714	prefoldin 1	protein-coding
MACS_peak_1108	chr1	121436557	121437018	+	Intergenic	Intergenic	14056	NM_146103	226351	Mm.439806	NM_146103	ENSMUSG00000098923	Tmem185b	2500001K11Rik	transmembrane protein 185B	protein-coding
MACS_peak_11084	chr18	36828364	36828788	+	intron (NR_028355, intron 1 of 3)	intron (NR_028355, intron 1 of 3)	1389	NM_001164406	24068	Mm.29058	NM_025291		Sra1	AA959952|Sra|Srap|Straa1|Strra1	steroid receptor RNA activator 1	protein-coding
MACS_peak_11086	chr18	36961115	36961701	+	promoter-TSS (NR_027885)	promoter-TSS (NR_027885)	-9	NR_027885	378472	Mm.482379	NR_027885		Vaultrc5	Gm22653|Mvg1	vault RNA component 5	ncRNA
MACS_peak_11089	chr18	37031621	37032153	+	Intergenic	Intergenic	-48072	NR_076393	627427		NR_076393	ENSMUSG00000063514	Gm6756	EG627427	3-phosphoglycerate dehydrogenase pseudogene	pseudo
MACS_peak_11094	chr18	37377569	37378128	+	intron (NM_001301259, intron 1 of 3)	intron (NM_001301259, intron 1 of 3)	-46804	NM_053126	93872	Mm.196703	NM_053126	ENSMUSG00000051663	Pcdhb1	PcdhbA	protocadherin beta 1	protein-coding
MACS_peak_11095	chr18	37460296	37460726	+	promoter-TSS (NM_053128)	promoter-TSS (NM_053128)	58	NM_053128	93874	Mm.82308	NM_053128	ENSMUSG00000045498	Pcdhb3	PcdhbC	protocadherin beta 3	protein-coding
MACS_peak_11096	chr18	37466803	37467189	+	promoter-TSS (NM_053129)	promoter-TSS (NM_053129)	-113	NM_053129	93875	Mm.196711	NM_053129	ENSMUSG00000045689	Pcdhb4	Pcdhb5A|PcdhbD	protocadherin beta 4	protein-coding
MACS_peak_11101	chr18	37906256	37906913	+	promoter-TSS (NM_033593)	promoter-TSS (NM_033593)	-258	NM_033593	93722	Mm.247203	NM_033593		Pcdhga10	-	protocadherin gamma subfamily A, 10	protein-coding
MACS_peak_11103	chr18	37931623	37932163	+	intron (NM_033595, intron 1 of 3)	intron (NM_033595, intron 1 of 3)	6659	NM_033595	93724	Mm.247203	NM_033595	ENSMUSG00000023036	Pcdhga12	Pcdh13|pc2c	protocadherin gamma subfamily A, 12	protein-coding
MACS_peak_11104	chr18	37944536	37945036	+	intron (NM_033595, intron 1 of 3)	ID_B1|SINE|B4	19552	NM_033595	93724	Mm.247203	NM_033595	ENSMUSG00000023036	Pcdhga12	Pcdh13|pc2c	protocadherin gamma subfamily A, 12	protein-coding
MACS_peak_11106	chr18	38000193	38000820	+	3' UTR (NM_033593, exon 4 of 4)	3' UTR (NM_033593, exon 4 of 4)	13808	NR_105945	102465592		NR_105945		Mir6979	mmu-mir-6979	microRNA mir-6979	ncRNA
MACS_peak_11109	chr18	38043000	38043921	+	intron (NM_007858, intron 16 of 26)	intron (NM_007858, intron 16 of 26)	-29146	NR_105945	102465592		NR_105945		Mir6979	mmu-mir-6979	microRNA mir-6979	ncRNA
MACS_peak_1111	chr1	121531276	121531958	+	intron (NM_001113416, intron 2 of 16)	intron (NM_001113416, intron 2 of 16)	13960	NM_001113416	226352	Mm.253156	NM_145506	ENSMUSG00000026383	Epb4.1l5	1700030C16Rik|AL022914|BE37|E230025E14Rik|Epb41l5|Lulu1|NBL5	erythrocyte protein band 4.1-like 5	protein-coding
MACS_peak_11110	chr18	38061173	38061752	+	intron (NM_007858, intron 6 of 26)	intron (NM_007858, intron 6 of 26)	33603	NM_007858	13367	Mm.195916	NM_007858	ENSMUSG00000024456	Diap1	D18Wsu154e|Dia1|Diaph1|Drf1|mKIAA4062|p140mDia	diaphanous homolog 1 (Drosophila)	protein-coding
MACS_peak_11112	chr18	38092257	38092748	+	intron (NM_007858, intron 1 of 26)	intron (NM_007858, intron 1 of 26)	2563	NM_007858	13367	Mm.195916	NM_007858	ENSMUSG00000024456	Diap1	D18Wsu154e|Dia1|Diaph1|Drf1|mKIAA4062|p140mDia	diaphanous homolog 1 (Drosophila)	protein-coding
MACS_peak_11114	chr18	38230089	38230789	+	Intergenic	Intergenic	-71816	NM_001205336	106952	Mm.247642	NM_139206	ENSMUSG00000024451	Arap3	Centd3|Drag1|E030006K04Rik|cnt-d3	ArfGAP with RhoGAP domain, ankyrin repeat and PH domain 3	protein-coding
MACS_peak_11115	chr18	38241329	38242056	+	Intergenic	Intergenic	-83069	NM_001205336	106952	Mm.247642	NM_139206	ENSMUSG00000024451	Arap3	Centd3|Drag1|E030006K04Rik|cnt-d3	ArfGAP with RhoGAP domain, ankyrin repeat and PH domain 3	protein-coding
MACS_peak_11116	chr18	38308485	38308800	+	Intergenic	Intergenic	60774	NM_029357	75599	Mm.36560	NM_029357	ENSMUSG00000051375	Pcdh1	2010005A06Rik|AI585920	protocadherin 1	protein-coding
MACS_peak_11119	chr18	38455962	38456399	+	promoter-TSS (NM_001164621)	promoter-TSS (NM_001164621)	-109	NM_020012	56736	Mm.228903	NM_020012	ENSMUSG00000060450	Rnf14	2310075C09Rik|2610005D23Rik|AA986456|AU041447|D18Ertd188e|D7Bwg0165e|Triad2	ring finger protein 14	protein-coding
MACS_peak_11121	chr18	38526405	38526750	+	Intergenic	Intergenic	-27930	NM_011937	26384	Mm.22374	NM_011937	ENSMUSG00000052102	Gnpda1	GNPDA|Gnp1|Gnpi|oscillin	glucosamine-6-phosphate deaminase 1	protein-coding
MACS_peak_11123	chr18	38543717	38544415	+	Intergenic	Intergenic	-34563	NM_022996	65113	Mm.102496	NM_022996	ENSMUSG00000024425	Ndfip1	0610010M22Rik|N4wbp5	Nedd4 family interacting protein 1	protein-coding
MACS_peak_11125	chr18	38724079	38724780	+	Intergenic	BGLII|LTR|ERVK	36493	NM_011898	24066	Mm.42038	NM_011898	ENSMUSG00000024427	Spry4	A030006O18Rik|sprouty4	sprouty homolog 4 (Drosophila)	protein-coding
MACS_peak_11127	chr18	38764268	38764909	+	Intergenic	MTC|LTR|MaLR	-3666	NM_011898	24066	Mm.42038	NM_011898	ENSMUSG00000024427	Spry4	A030006O18Rik|sprouty4	sprouty homolog 4 (Drosophila)	protein-coding
MACS_peak_1113	chr1	122250772	122251489	+	Intergenic	Intergenic	13971	NM_207233	226359	Mm.337409	NM_207233	ENSMUSG00000036907	C1ql2	BC040774|CTRP10	complement component 1, q subcomponent-like 2	protein-coding
MACS_peak_11132	chr18	39120360	39121133	+	intron (NM_001033789, intron 4 of 4)	RLTR17|LTR|ERVK	-32053	NM_175164	71302	Mm.329396	NM_175164	ENSMUSG00000036452	Arhgap26	1810044B20Rik|2610010G17Rik|4933432P15Rik|AI853435|mKIAA0621	Rho GTPase activating protein 26	protein-coding
MACS_peak_11135	chr18	39237935	39238488	+	intron (NM_175164, intron 1 of 22)	MLT1A|LTR|MaLR	85412	NM_175164	71302	Mm.329396	NM_175164	ENSMUSG00000036452	Arhgap26	1810044B20Rik|2610010G17Rik|4933432P15Rik|AI853435|mKIAA0621	Rho GTPase activating protein 26	protein-coding
MACS_peak_11136	chr18	39284164	39284917	+	intron (NM_175164, intron 8 of 22)	RLTR17|LTR|ERVK	131741	NM_175164	71302	Mm.329396	NM_175164	ENSMUSG00000036452	Arhgap26	1810044B20Rik|2610010G17Rik|4933432P15Rik|AI853435|mKIAA0621	Rho GTPase activating protein 26	protein-coding
MACS_peak_11137	chr18	39323042	39323654	+	intron (NM_175164, intron 11 of 22)	ORR1B2|LTR|MaLR	170549	NM_175164	71302	Mm.329396	NM_175164	ENSMUSG00000036452	Arhgap26	1810044B20Rik|2610010G17Rik|4933432P15Rik|AI853435|mKIAA0621	Rho GTPase activating protein 26	protein-coding
MACS_peak_11139	chr18	39961970	39962575	+	Intergenic	Intergenic	29121	NM_011033	18459	Mm.9493	NM_011033	ENSMUSG00000051732	Pabpc2	Pabp|Pabp+|Pabp2	poly(A) binding protein, cytoplasmic 2	protein-coding
MACS_peak_1114	chr1	122264530	122265086	+	Intergenic	Intergenic	27649	NM_207233	226359	Mm.337409	NM_207233	ENSMUSG00000036907	C1ql2	BC040774|CTRP10	complement component 1, q subcomponent-like 2	protein-coding
MACS_peak_11141	chr18	40392849	40393659	+	Intergenic	RLTR13D6|LTR|ERVK	-14201	NM_023311	67180	Mm.270382	NM_023311	ENSMUSG00000024487	Yipf5	2610311I19Rik|AA408236|Yip1a	Yip1 domain family, member 5	protein-coding
MACS_peak_11143	chr18	40642315	40643003	+	intron (NM_026135, intron 1 of 1)	intron (NM_026135, intron 1 of 1)	224644	NM_026135	383348	Mm.76366	NM_026135	ENSMUSG00000051401	Kctd16	4930434H12Rik|Gm1267	potassium channel tetramerisation domain containing 16	protein-coding
MACS_peak_11147	chr18	42062707	42063284	+	intron (NM_029942, intron 5 of 6)	intron (NM_029942, intron 5 of 6)	47853	NM_029942	77619	Mm.30649	NM_029942	ENSMUSG00000056671	Prelid2	1700003A01Rik|C330008K14Rik	PRELI domain containing 2	protein-coding
MACS_peak_11148	chr18	42250032	42250768	+	intron (NM_001146299, intron 1 of 8)	intron (NM_001146299, intron 1 of 8)	37036	NM_001146299	269016	Mm.45472	NM_172966	ENSMUSG00000057719	Sh3rf2	2310046K19|9130023G24Rik|AI452083|Ppp1r39|RNF158	SH3 domain containing ring finger 2	protein-coding
MACS_peak_11149	chr18	42250790	42251282	+	intron (NM_001146299, intron 1 of 8)	MER3|DNA|MER1_type	37672	NM_001146299	269016	Mm.45472	NM_172966	ENSMUSG00000057719	Sh3rf2	2310046K19|9130023G24Rik|AI452083|Ppp1r39|RNF158	SH3 domain containing ring finger 2	protein-coding
MACS_peak_11153	chr18	42467524	42468084	+	intron (NM_172626, intron 8 of 19)	intron (NM_172626, intron 8 of 19)	32797	NM_172626	225432	Mm.329400	NM_172626	ENSMUSG00000024491	Rbm27	A730010I06|AI043120|Psc1|mKIAA1311	RNA binding motif protein 27	protein-coding
MACS_peak_11154	chr18	42547354	42547942	+	Intergenic	B1_Mur4|SINE|Alu	-6603	NM_138945	18998	Mm.488204	NM_138945		Pou4f3	Brn3.1|Brn3c|ddl|dreidel	POU domain, class 4, transcription factor 3	protein-coding
MACS_peak_11156	chr18	42679683	42680320	+	intron (NR_110344, intron 2 of 22)	B1_Mus2|SINE|Alu	8860	NR_110344	56070	Mm.270511	NM_001039474	ENSMUSG00000024498	Tcerg1	2410022J09Rik|2900090C16Rik|AI428505|CA150b|FBP23|FBP28|Taf2s|ca150|p144	transcription elongation regulator 1 (CA150)	protein-coding
MACS_peak_11157	chr18	42892481	42893152	+	intron (NR_073583, intron 3 of 8)	intron (NR_073583, intron 3 of 8)	-153510	NM_181543	240239	Mm.186779	NM_181543	ENSMUSG00000042816	Gpr151	C130082O03Rik|GalRL|PGR7|nGPCR-2037	G protein-coupled receptor 151	protein-coding
MACS_peak_11159	chr18	43193659	43194184	+	intron (NM_028392, intron 1 of 8)	intron (NM_028392, intron 1 of 8)	25204	NM_028392	72930	Mm.26134	NM_027531	ENSMUSG00000024500	Ppp2r2b	2900026H06Rik|6330404L05Rik|E130009M08Rik|PP2A-PR55B|PR55-BETA|SCA12	protein phosphatase 2, regulatory subunit B, beta	protein-coding
MACS_peak_11161	chr18	43380685	43381489	+	intron (NM_178749, intron 2 of 12)	RLTR13D6|LTR|ERVK	13736	NM_178749	269019	Mm.150401	NM_178749	ENSMUSG00000039954	Stk32a	A930015B13Rik|YANK1	serine/threonine kinase 32A	protein-coding
MACS_peak_11163	chr18	43452192	43452742	+	intron (NM_178749, intron 6 of 12)	MIR|SINE|MIR	80459	NM_001136086	22240	Mm.8180	NM_009468	ENSMUSG00000024501	Dpysl3	CRMP-4|DRP-3|TUC4|ULIP-1|Ulip|Ulip1	dihydropyrimidinase-like 3	protein-coding
MACS_peak_11165	chr18	44302023	44302539	+	Intergenic	RLTR25B|LTR|ERVK	17258	NM_001281470	100042855	Mm.479515	NM_001165950	ENSMUSG00000069385	Gm10267	ENSMUSG00000069385|Vtlgl1	predicted gene 10267	protein-coding
MACS_peak_11167	chr18	44424356	44425038	+	Intergenic	IAPEz-int|LTR|ERVK	-5084	NM_010935	18169	Mm.57234	NM_010935	ENSMUSG00000038071	Npy6r	-	neuropeptide Y receptor Y6	protein-coding
MACS_peak_11168	chr18	44470776	44471570	+	Intergenic	Intergenic	-22555	NM_001033621	58916	Mm.143804	NM_001033621	ENSMUSG00000024471	Myot	5530402I04Rik|Ttid	myotilin	protein-coding
MACS_peak_11172	chr18	44732935	44733530	+	intron (NM_001085373, intron 3 of 18)	intron (NM_001085373, intron 3 of 18)	-88087	NR_026853	626275	Mm.427116	NR_026853	ENSMUSG00000097610	A930012L18Rik	-	RIKEN cDNA A930012L18 gene	ncRNA
MACS_peak_1118	chr1	122540347	122540982	+	Intergenic	Intergenic	41600	NM_010133	13798	Mm.2657	NM_010133		En1	En-1|Mo-en.1	engrailed 1	protein-coding
MACS_peak_11183	chr18	45729562	45730038	+	intron (NM_080465, intron 2 of 7)	MIR|SINE|MIR	9992	NM_080465	140492	Mm.458654	NM_080465	ENSMUSG00000054477	Kcnn2	KCa2.2|SK2|SKCA2|fri	potassium intermediate/small conductance calcium-activated channel, subfamily N, member 2	protein-coding
MACS_peak_11187	chr18	46372400	46372888	+	promoter-TSS (NM_178872)	promoter-TSS (NM_178872)	-383	NM_178872	28105	Mm.277382	NM_178872	ENSMUSG00000033949	Trim36	D18Wsu100e|haprin	tripartite motif-containing 36	protein-coding
MACS_peak_11189	chr18	46608061	46608551	+	Intergenic	Intergenic	17164	NR_045438	72076	Mm.82766	NM_028086	ENSMUSG00000046487	Mospd4	2010013H21Rik	motile sperm domain containing 4	pseudo
MACS_peak_11192	chr18	47073890	47074581	+	Intergenic	RMER16|LTR|ERVK	-7234	NM_001033446	381142	Mm.329423	NM_001033446	ENSMUSG00000073568	Arl14epl	Gm949	ADP-ribosylation factor-like 14 effector protein-like	protein-coding
MACS_peak_11195	chr18	47517938	47518612	+	intron (NM_018744, intron 1 of 18)	intron (NM_018744, intron 1 of 18)	10247	NM_018744	20358	Mm.40909	NM_018744	ENSMUSG00000019647	Sema6a	9330158E07|A730020P05Rik|AI851735|Sema6A-1|Semaq|VIa|b2b997Clo	sema domain, transmembrane domain (TM), and cytoplasmic domain, (semaphorin) 6A	protein-coding
MACS_peak_11196	chr18	47529790	47530285	+	Intergenic	Intergenic	-1515	NM_018744	20358	Mm.40909	NM_018744	ENSMUSG00000019647	Sema6a	9330158E07|A730020P05Rik|AI851735|Sema6A-1|Semaq|VIa|b2b997Clo	sema domain, transmembrane domain (TM), and cytoplasmic domain, (semaphorin) 6A	protein-coding
MACS_peak_11197	chr18	47652510	47653015	+	Intergenic	Intergenic	40440	NR_033453	77668	Mm.98433	NR_033453		9130209A04Rik	-	RIKEN cDNA 9130209A04 gene	ncRNA
MACS_peak_11198	chr18	47655417	47656023	+	Intergenic	Intergenic	-41669	NR_033454	328953	Mm.246768	NR_033454		Gm5095	A730092B10	predicted gene 5095	ncRNA
MACS_peak_1120	chr1	122655963	122656402	+	Intergenic	Intergenic	157118	NM_010133	13798	Mm.2657	NM_010133		En1	En-1|Mo-en.1	engrailed 1	protein-coding
MACS_peak_11209	chr18	49686744	49687575	+	Intergenic	RLTR13B1|LTR|ERVK	4216	NR_033785	67321	Mm.245802	NR_033785		1700044K03Rik	-	RIKEN cDNA 1700044K03 gene	ncRNA
MACS_peak_1121	chr1	122656468	122656941	+	Intergenic	Intergenic	157640	NM_010133	13798	Mm.2657	NM_010133		En1	En-1|Mo-en.1	engrailed 1	protein-coding
MACS_peak_11210	chr18	49906556	49907113	+	intron (NM_026854, intron 1 of 5)	intron (NM_026854, intron 1 of 5)	8421	NM_026854	68857	Mm.96010	NM_026854	ENSMUSG00000024505	Dtwd2	1190002H09Rik|8030470C17Rik|AI414673|BB115449	DTW domain containing 2	protein-coding
MACS_peak_11211	chr18	49992806	49993404	+	intron (NM_001081371, intron 1 of 42)	intron (NM_001081371, intron 1 of 42)	454	NM_001081371	240283	Mm.257790	NM_001081371	ENSMUSG00000037416	Dmxl1	C630007L23Rik|D030030C22	Dmx-like 1	protein-coding
MACS_peak_11219	chr18	52092099	52092830	+	Intergenic	RLTR13D6|LTR|ERVK	-398726	NM_026286	67634	Mm.179144	NM_026286	ENSMUSG00000024510	Ftmt	4930447C24Rik|FerH|Fth3|MtF	ferritin mitochondrial	protein-coding
MACS_peak_11220	chr18	52147855	52148265	+	Intergenic	RLTR9A2|LTR|ERVK	-343130	NM_026286	67634	Mm.179144	NM_026286	ENSMUSG00000024510	Ftmt	4930447C24Rik|FerH|Fth3|MtF	ferritin mitochondrial	protein-coding
MACS_peak_11224	chr18	53374307	53374721	+	intron (NM_026386, intron 11 of 14)	intron (NM_026386, intron 11 of 14)	-30802	NM_029394	69226	Mm.32414	NM_029394	ENSMUSG00000024535	Snx24	2810011K15Rik|5730433I16Rik|AI451341	sorting nexing 24	protein-coding
MACS_peak_11226	chr18	53571106	53571695	+	intron (NM_008908, intron 1 of 4)	intron (NM_008908, intron 1 of 4)	6261	NM_008908	19038	Mm.4587	NM_008908	ENSMUSG00000024538	Ppic	CyP-20c	peptidylprolyl isomerase C	protein-coding
MACS_peak_11229	chr18	54286616	54287107	+	Intergenic	Intergenic	265094	NM_152809	70425	Mm.368668	NM_152809	ENSMUSG00000073563	Csnk1g3	3300002K07Rik|C330049O21Rik	casein kinase 1, gamma 3	protein-coding
MACS_peak_1123	chr1	122993481	122994048	+	intron (NR_110450, intron 1 of 2)	intron (NR_110450, intron 1 of 2)	9782	NR_110450	98452	Mm.131017	NR_038008	ENSMUSG00000097881	Celrr	AI848258|B230209K01Rik|Celr|Gm818	cerebellum expressed regulatory RNA	ncRNA
MACS_peak_11232	chr18	54878961	54879482	+	Intergenic	Intergenic	107823	NR_045400	328957	Mm.402781	NR_045400		9330117O12Rik	9330117O12	RIKEN cDNA 9330117O12 gene	ncRNA
MACS_peak_11237	chr18	55348309	55348652	+	Intergenic	Intergenic	-198646	NM_175751	269023	Mm.192984	NM_175751	ENSMUSG00000052713	Zfp608	4932417D18Rik|D430007A19Rik|Znf608	zinc finger protein 608	protein-coding
MACS_peak_11241	chr18	56084153	56084706	+	Intergenic	RMER4A|LTR|ERVK	-507357	NM_026240	107022	Mm.24356	NM_026240	ENSMUSG00000001700	Gramd3	9030613F08Rik|9130427A09Rik|AW061306|NS3TP2	GRAM domain containing 3	protein-coding
MACS_peak_11243	chr18	56312069	56312536	+	Intergenic	Intergenic	-279484	NM_026240	107022	Mm.24356	NM_026240	ENSMUSG00000001700	Gramd3	9030613F08Rik|9130427A09Rik|AW061306|NS3TP2	GRAM domain containing 3	protein-coding
MACS_peak_11244	chr18	56459875	56460424	+	Intergenic	B3|SINE|B2	-131637	NM_026240	107022	Mm.24356	NM_026240	ENSMUSG00000001700	Gramd3	9030613F08Rik|9130427A09Rik|AW061306|NS3TP2	GRAM domain containing 3	protein-coding
MACS_peak_11250	chr18	56879556	56880000	+	intron (NM_010721, intron 1 of 10)	intron (NM_010721, intron 1 of 10)	12311	NM_010721	16906	Mm.4105	NM_010721	ENSMUSG00000024590	Lmnb1	-	lamin B1	protein-coding
MACS_peak_11253	chr18	57134957	57135456	+	promoter-TSS (NM_029909)	promoter-TSS (NM_029909)	-173	NM_029909	77422	Mm.256874	NM_029909	ENSMUSG00000024592	C330018D20Rik	AU018666	RIKEN cDNA C330018D20 gene	protein-coding
MACS_peak_11255	chr18	57987277	57987810	+	Intergenic	Intergenic	-50789	NM_009194	20496	Mm.399997	NM_009194	ENSMUSG00000024597	Slc12a2	9330166H04Rik|Nkcc1|mBSC2|sy-ns	solute carrier family 12, member 2	protein-coding
MACS_peak_11259	chr18	58623526	58623985	+	Intergenic	Intergenic	-92139	NM_001081072	225579	Mm.258517	NM_001081072	ENSMUSG00000024600	Slc27a6	4732438L20Rik|FACVL2|FATP6|VLCS-H1	solute carrier family 27 (fatty acid transporter), member 6	protein-coding
MACS_peak_11264	chr18	59962283	59962809	+	Intergenic	RLTR13B1|LTR|ERVK	223262	NR_105773	102465182		NR_105773	miRBase:MI0021883	Mir6355	mmu-mir-6355	microRNA mir-6355	ncRNA
MACS_peak_11265	chr18	60019680	60020165	+	Intergenic	Intergenic	280638	NR_105773	102465182		NR_105773	miRBase:MI0021883	Mir6355	mmu-mir-6355	microRNA mir-6355	ncRNA
MACS_peak_1127	chr1	123464358	123465003	+	promoter-TSS (NM_025860)	promoter-TSS (NM_025860)	-123	NM_025860	66942	Mm.44219	NM_025860	ENSMUSG00000001674	Ddx18	2310005B10Rik	DEAD (Asp-Glu-Ala-Asp) box polypeptide 18	protein-coding
MACS_peak_11271	chr18	60870393	60870822	+	intron (NM_008306, intron 1 of 13)	intron (NM_008306, intron 1 of 13)	2436	NM_008306	15531	Mm.181862	NM_008306	ENSMUSG00000054008	Ndst1	1200015G06Rik|Hsst|NDST-1|b2b2230Clo	N-deacetylase/N-sulfotransferase (heparan glucosaminyl) 1	protein-coding
MACS_peak_11279	chr18	61436189	61436754	+	intron (NM_146086, intron 17 of 21)	MIR|SINE|MIR	56318	NM_146086	225600	Mm.391106	NM_146086	ENSMUSG00000024575	Pde6a	Pdea|nmf282	phosphodiesterase 6A, cGMP-specific, rod, alpha	protein-coding
MACS_peak_11280	chr18	61714222	61714697	+	promoter-TSS (NM_146087)	promoter-TSS (NM_146087)	-777	NM_146087	93687	Mm.26908	NM_146087	ENSMUSG00000024576	Csnk1a1	2610208K14Rik|4632404G05Rik|5430427P18Rik|CK1a|Csnk1a	casein kinase 1, alpha 1	protein-coding
MACS_peak_11281	chr18	61752733	61753332	+	Intergenic	Intergenic	37796	NM_146087	93687	Mm.26908	NM_146087	ENSMUSG00000024576	Csnk1a1	2610208K14Rik|4632404G05Rik|5430427P18Rik|CK1a|Csnk1a	casein kinase 1, alpha 1	protein-coding
MACS_peak_11282	chr18	61769358	61769988	+	Intergenic	Intergenic	-29634	NR_045420	545261	Mm.426593	NR_045420	ENSMUSG00000098098	Gm20748	Bvht	predicted gene, 20748	ncRNA
MACS_peak_11284	chr18	61803111	61803785	+	intron (NR_045420, intron 1 of 2)	intron (NR_045420, intron 1 of 2)	4100	NR_029557	387163		NR_029557		Mir145a	Mir145|Mirn145|mmu-mir-145|mmu-mir-145a	microRNA 145a	ncRNA
MACS_peak_11285	chr18	61857605	61858256	+	intron (NM_172832, intron 5 of 5)	intron (NM_172832, intron 5 of 5)	9359	NM_172832	240334	Mm.234457	NM_172832	ENSMUSG00000024579	Pcyox1l	BC060677|C630049M13	prenylcysteine oxidase 1 like	protein-coding
MACS_peak_11286	chr18	61865740	61866475	+	intron (NM_172832, intron 1 of 5)	intron (NM_172832, intron 1 of 5)	1182	NM_172832	240334	Mm.234457	NM_172832	ENSMUSG00000024579	Pcyox1l	BC060677|C630049M13	prenylcysteine oxidase 1 like	protein-coding
MACS_peak_11287	chr18	61885810	61886338	+	promoter-TSS (NM_021296)	promoter-TSS (NM_021296)	30	NR_029432	68982	Mm.441992	NR_029432	ENSMUSG00000098702	1500015A07Rik	-	RIKEN cDNA 1500015A07 gene	ncRNA
MACS_peak_11288	chr18	62423958	62424617	+	Intergenic	Intergenic	-59571	NM_008313	15562	Mm.20440	NM_008313	ENSMUSG00000026322	Htr4	5-HT-4|5-HT4|5-HT<4L>|5HTR4	5 hydroxytryptamine (serotonin) receptor 4	protein-coding
MACS_peak_11291	chr18	62807393	62807976	+	intron (NM_001168423, intron 1 of 4)	RLTR11B|LTR|ERVK	-51766	NM_001001803	408198	Mm.478742	NM_001001803	ENSMUSG00000060201	Spink7	EG408198|Ecg2	serine peptidase inhibitor, Kazal type 7 (putative)	protein-coding
MACS_peak_11293	chr18	63137125	63137612	+	promoter-TSS (NM_028017)	promoter-TSS (NM_028017)	-202	NM_028017	108123	Mm.292687	NM_028017	ENSMUSG00000024581	Napg	2400003O04Rik|SNARE	N-ethylmaleimide sensitive fusion protein attachment protein gamma	protein-coding
MACS_peak_11298	chr18	63398162	63399090	+	intron (NM_001039485, intron 3 of 53)	RLTR13D1|LTR|ERVK	148211	NM_001039485	667742	Mm.158720	NM_172629	ENSMUSG00000041482	Piezo2	5930434P17|9030411M15Rik|9430028L06Rik|Fam38b|Fam38b2	piezo-type mechanosensitive ion channel component 2	protein-coding
MACS_peak_11301	chr18	63852106	63852631	+	promoter-TSS (NM_016792)	promoter-TSS (NM_016792)	-355	NM_016792	53382	Mm.19169	NM_016792	ENSMUSG00000024583	Txnl1	32kDa|TRP32|Txnl	thioredoxin-like 1	protein-coding
MACS_peak_11302	chr18	63940046	63940546	+	intron (NM_001014981, intron 16 of 27)	intron (NM_001014981, intron 16 of 27)	71947	NM_001014981	104082	Mm.30850	NM_001014981	ENSMUSG00000040560	Wdr7	AI462727|TRAG|mKIAA0541	WD repeat domain 7	protein-coding
MACS_peak_11303	chr18	64023678	64024318	+	intron (NM_001014981, intron 20 of 27)	intron (NM_001014981, intron 20 of 27)	155649	NM_001014981	104082	Mm.30850	NM_001014981	ENSMUSG00000040560	Wdr7	AI462727|TRAG|mKIAA0541	WD repeat domain 7	protein-coding
MACS_peak_11305	chr18	64083926	64084883	+	intron (NM_001014981, intron 22 of 27)	intron (NM_001014981, intron 22 of 27)	216055	NM_001014981	104082	Mm.30850	NM_001014981	ENSMUSG00000040560	Wdr7	AI462727|TRAG|mKIAA0541	WD repeat domain 7	protein-coding
MACS_peak_11307	chr18	64425964	64426436	+	intron (NM_009182, intron 3 of 5)	intron (NM_009182, intron 3 of 5)	10634	NR_045366	73588	Mm.65475	NR_045366	ENSMUSG00000086128	St8sia3os	1700091E21Rik	ST8 alpha-N-acetyl-neuraminide alpha-2,8-sialyltransferase 3, opposite strand	ncRNA
MACS_peak_11308	chr18	64544473	64545040	+	intron (NM_194268, intron 1 of 1)	MTC|LTR|MaLR	44738	NM_194268	225631	Mm.234723	NM_194268	ENSMUSG00000045991	Onecut2	C730009D12|OC-2|Oc2	one cut domain, family member 2	protein-coding
MACS_peak_11310	chr18	64679171	64679767	+	Intergenic	ORR1D2|LTR|MaLR	-3258	NM_001142950	70223	Mm.29192	NM_027350	ENSMUSG00000024587	Nars	3010001M15Rik|AA960128|ASNRS|C78150	asparaginyl-tRNA synthetase	protein-coding
MACS_peak_11311	chr18	64902914	64903197	+	Intergenic	Intergenic	-82401	NM_001001488	54670	Mm.270043	NM_001001488	ENSMUSG00000039529	Atp8b1	AI451886|FIC1|Ic	ATPase, class I, type 8B, member 1	protein-coding
MACS_peak_11312	chr18	64981226	64981858	+	Intergenic	Lx8|LINE|L1	-65868	NM_001114386	83814	Mm.98668	NM_031881	ENSMUSG00000024589	Nedd4l	1300012C07Rik|Nedd4-2|Nedd4b	neural precursor cell expressed, developmentally down-regulated gene 4-like	protein-coding
MACS_peak_11316	chr18	65282062	65282698	+	intron (NM_031881, intron 4 of 29)	intron (NM_031881, intron 4 of 29)	99199	NM_031881	83814	Mm.98668	NM_031881	ENSMUSG00000024589	Nedd4l	1300012C07Rik|Nedd4-2|Nedd4b	neural precursor cell expressed, developmentally down-regulated gene 4-like	protein-coding
MACS_peak_11318	chr18	65657703	65658155	+	Intergenic	Intergenic	67278	NM_172833	240354	Mm.132613	NM_172833	ENSMUSG00000032688	Malt1	A630046N12|D430033E09Rik	mucosa associated lymphoid tissue lymphoma translocation gene 1	protein-coding
MACS_peak_11319	chr18	65666486	65667106	+	Intergenic	Intergenic	-73088	NM_207255	328977	Mm.286232	NM_207255	ENSMUSG00000042439	Zfp532	C530030I18Rik|Znf532|mKIAA1629	zinc finger protein 532	protein-coding
MACS_peak_1132	chr1	123739130	123739869	+	Intergenic	L1MA8|LINE|L1	-274942	NM_025860	66942	Mm.44219	NM_025860	ENSMUSG00000001674	Ddx18	2310005B10Rik	DEAD (Asp-Glu-Ala-Asp) box polypeptide 18	protein-coding
MACS_peak_11320	chr18	65725081	65726002	+	Intergenic	Intergenic	-14343	NM_207255	328977	Mm.286232	NM_207255	ENSMUSG00000042439	Zfp532	C530030I18Rik|Znf532|mKIAA1629	zinc finger protein 532	protein-coding
MACS_peak_11323	chr18	65757397	65758202	+	intron (NM_207255, intron 2 of 5)	B1_Mur1|SINE|Alu	17915	NM_207255	328977	Mm.286232	NM_207255	ENSMUSG00000042439	Zfp532	C530030I18Rik|Znf532|mKIAA1629	zinc finger protein 532	protein-coding
MACS_peak_11324	chr18	65763433	65763838	+	intron (NM_207255, intron 2 of 5)	intron (NM_207255, intron 2 of 5)	23751	NM_207255	328977	Mm.286232	NM_207255	ENSMUSG00000042439	Zfp532	C530030I18Rik|Znf532|mKIAA1629	zinc finger protein 532	protein-coding
MACS_peak_11325	chr18	65901954	65902489	+	intron (NM_177028, intron 11 of 14)	intron (NM_177028, intron 11 of 14)	44299	NM_177028	319888	Mm.183576	NM_177028	ENSMUSG00000046610	Oacyl	5330437I02Rik|Acyl3	O-acyltransferase like	protein-coding
MACS_peak_11326	chr18	65992511	65993261	+	Intergenic	Intergenic	32654	NM_025468	66286	Mm.27800	NM_025468	ENSMUSG00000024516	Sec11c	1810029G24Rik|Sec11l3	SEC11 homolog C (S. cerevisiae)	protein-coding
MACS_peak_1133	chr1	124503737	124504388	+	Intergenic	RLTR25B|LTR|ERVK	-1039505	NM_025860	66942	Mm.44219	NM_025860	ENSMUSG00000001674	Ddx18	2310005B10Rik	DEAD (Asp-Glu-Ala-Asp) box polypeptide 18	protein-coding
MACS_peak_11331	chr18	66100696	66101346	+	Intergenic	Intergenic	-2278	NM_013833	19434	Mm.431047	NM_013833	ENSMUSG00000024518	Rax	7530406A22Rik|E130303K03Rik|Rx|ey-1|ey1	retina and anterior neural fold homeobox	protein-coding
MACS_peak_11333	chr18	66200878	66201292	+	Intergenic	Intergenic	-38796	NM_001172062	70361	Mm.290857	NM_027400	ENSMUSG00000041891	Lman1	2610020P13Rik|AI326273|AU043785|C730041J05|ERGIC53|F5F8D|MCFD1|MR60|P58|gp58	lectin, mannose-binding, 1	protein-coding
MACS_peak_11336	chr18	66588746	66589367	+	Intergenic	Intergenic	-29202	NM_021451	58801	Mm.271878	NM_021451	ENSMUSG00000024521	Pmaip1	Noxa	phorbol-12-myristate-13-acetate-induced protein 1	protein-coding
MACS_peak_11337	chr18	66617306	66617751	+	promoter-TSS (NM_021451)	promoter-TSS (NM_021451)	-730	NM_021451	58801	Mm.271878	NM_021451	ENSMUSG00000024521	Pmaip1	Noxa	phorbol-12-myristate-13-acetate-induced protein 1	protein-coding
MACS_peak_1134	chr1	124961797	124962214	+	Intergenic	Intergenic	980131	NM_199021	269109	Mm.483255	NM_199021	ENSMUSG00000036815	Dpp10	6430601K09Rik|DPP X|Dprp3	dipeptidylpeptidase 10	protein-coding
MACS_peak_11341	chr18	67005578	67006082	+	Intergenic	L2a|LINE|L2	14311	NM_016977	17202	Mm.229447	NM_016977	ENSMUSG00000047259	Mc4r	Mc4-r	melanocortin 4 receptor	protein-coding
MACS_peak_11342	chr18	67097137	67097630	+	intron (NR_040461, intron 1 of 4)	intron (NR_040461, intron 1 of 4)	12232	NR_040461	100503582	Mm.329508	NR_040461		Gm19784	-	predicted gene, 19784	ncRNA
MACS_peak_11343	chr18	67130226	67130948	+	Intergenic	RLTR9A|LTR|ERVK	-20972	NR_040461	100503582	Mm.329508	NR_040461		Gm19784	-	predicted gene, 19784	ncRNA
MACS_peak_11344	chr18	67135279	67135973	+	Intergenic	RLTR13D1|LTR|ERVK	-26011	NR_040461	100503582	Mm.329508	NR_040461		Gm19784	-	predicted gene, 19784	ncRNA
MACS_peak_11345	chr18	67427172	67428569	+	Intergenic	RLTR13C2|LTR|ERVK	-21007	NM_053261	114663	Mm.34079	NM_053261	ENSMUSG00000024525	Impa2	2210415D20Rik|AI326924|AW259601	inositol (myo)-1(or 4)-monophosphatase 2	protein-coding
MACS_peak_11348	chr18	67483913	67484574	+	non-coding (NR_033214, exon 2 of 4)	non-coding (NR_033214, exon 2 of 4)	-18975	NM_007702	12683	Mm.449	NM_007702	ENSMUSG00000024526	Cidea	AW212747	cell death-inducing DNA fragmentation factor, alpha subunit-like effector A	protein-coding
MACS_peak_1135	chr1	126071353	126071705	+	Intergenic	Intergenic	-129393	NM_199021	269109	Mm.483255	NM_199021	ENSMUSG00000036815	Dpp10	6430601K09Rik|DPP X|Dprp3	dipeptidylpeptidase 10	protein-coding
MACS_peak_11351	chr18	67656944	67657963	+	intron (NM_176832, intron 9 of 13)	intron (NM_176832, intron 9 of 13)	32950	NM_144867	225655	Mm.221420	NM_144867	ENSMUSG00000024530	Slmo1	A230074A19Rik|BC019561	slowmo homolog 1 (Drosophila)	protein-coding
MACS_peak_11352	chr18	67891927	67892496	+	Intergenic	Intergenic	-7936	NM_008977	19255	Mm.260433	NM_008977	ENSMUSG00000024539	Ptpn2	AI325124|Ptpt|TC-PTP	protein tyrosine phosphatase, non-receptor type 2	protein-coding
MACS_peak_11353	chr18	68081031	68081631	+	Intergenic	Lx9|LINE|L1	-11580	NM_172631	52662	Mm.440183	NM_172631	ENSMUSG00000024544	Ldlrad4	8230401C20Rik|A430083H02|A430108L08Rik|C18orf1|D18Ertd653e|D330030L18Rik	low density lipoprotein receptor class A domain containing 4	protein-coding
MACS_peak_11356	chr18	68420556	68421119	+	promoter-TSS (NR_106078)	promoter-TSS (NR_106078)	-210	NR_106078	102465702		NR_106078	miRBase:MI0023714	Mir7219	mmu-mir-7219	microRNA mir-7219	ncRNA
MACS_peak_11359	chr18	68791952	68792451	+	Intergenic	Intergenic	-106853	NR_105774	102465183		NR_105774	miRBase:MI0021884	Mir6356	mmu-mir-6356	microRNA mir-6356	ncRNA
MACS_peak_11363	chr18	69298638	69299103	+	Intergenic	Intergenic	-116943	NR_105780	102465187		NR_105780	miRBase:MI0021890	Mir145b	mmu-mir-145b	microRNA mir-145b	ncRNA
MACS_peak_11365	chr18	69722210	69722721	+	intron (NM_001083967, intron 6 of 19)	intron (NM_001083967, intron 6 of 19)	217090	NM_001083967	21413	Mm.4269	NM_013685	ENSMUSG00000053477	Tcf4	5730422P05Rik|ASP-I2|E2-2|E2.2|ITF-2|ITF-2b|ITF2|ME2|MITF-2A|MITF-2B|SEF-2|SEF2|SEF2-1|TFE|Tcf-4|bHLHb19	transcription factor 4	protein-coding
MACS_peak_11367	chr18	69812610	69813017	+	intron (NM_001083967, intron 13 of 19)	intron (NM_001083967, intron 13 of 19)	-272400	NM_201362	381175	Mm.266831	NM_201362	ENSMUSG00000038903	Ccdc68	BC046343	coiled-coil domain containing 68	protein-coding
MACS_peak_11368	chr18	69941655	69942471	+	Intergenic	Intergenic	-143150	NM_201362	381175	Mm.266831	NM_201362	ENSMUSG00000038903	Ccdc68	BC046343	coiled-coil domain containing 68	protein-coding
MACS_peak_11369	chr18	70479078	70479851	+	Intergenic	ETnERV2-int|LTR|ERVK	-75226	NM_029346	75577	Mm.58214	NM_029346	ENSMUSG00000024512	Dynap	2310002L13Rik	dynactin associated protein	protein-coding
MACS_peak_11373	chr18	71662824	71663355	+	intron (NM_007831, intron 12 of 28)	RLTR20B3|LTR|ERVK	847634	NM_007831	13176	Mm.167882	NM_007831		Dcc	C030036D22Rik|Igdcc1	deleted in colorectal carcinoma	protein-coding
MACS_peak_11374	chr18	71708240	71708864	+	intron (NM_007831, intron 10 of 28)	intron (NM_007831, intron 10 of 28)	802171	NM_007831	13176	Mm.167882	NM_007831		Dcc	C030036D22Rik|Igdcc1	deleted in colorectal carcinoma	protein-coding
MACS_peak_11376	chr18	71791164	71791569	+	intron (NM_007831, intron 7 of 28)	L1Md_T|LINE|L1	719357	NM_007831	13176	Mm.167882	NM_007831		Dcc	C030036D22Rik|Igdcc1	deleted in colorectal carcinoma	protein-coding
MACS_peak_11377	chr18	71797405	71798015	+	intron (NM_007831, intron 7 of 28)	IAPEz-int|LTR|ERVK	713013	NM_007831	13176	Mm.167882	NM_007831		Dcc	C030036D22Rik|Igdcc1	deleted in colorectal carcinoma	protein-coding
MACS_peak_11382	chr18	73922329	73923000	+	Intergenic	B2_Mm1t|SINE|B2	-8531	NM_053255	114615	Mm.50642	NM_053255	ENSMUSG00000036941	Elac1	2610018O07Rik|8430417G19Rik	elaC homolog 1 (E. coli)	protein-coding
MACS_peak_11384	chr18	74177054	74177731	+	promoter-TSS (NR_045390)	promoter-TSS (NR_045390)	-169	NR_045390	77855	Mm.410760	NR_045390	ENSMUSG00000090263	D730045A05Rik	-	RIKEN cDNA D730045A05 gene	ncRNA
MACS_peak_11387	chr18	74586480	74587052	+	Intergenic	RLTR11B|LTR|ERVK	-15507	NM_201600	17919	Mm.260098	NM_008661	ENSMUSG00000025885	Myo5b	AI661750|mKIAA1119	myosin VB	protein-coding
MACS_peak_11388	chr18	74961391	74961785	+	intron (NM_177470, intron 8 of 9)	RMER16|LTR|ERVK	22722	NM_177470	52538	Mm.245724	NM_177470	ENSMUSG00000036880	Acaa2	0610011L04Rik|AI255831|AI265397|D18Ertd240e	acetyl-Coenzyme A acyltransferase 2 (mitochondrial 3-oxoacyl-Coenzyme A thiolase)	protein-coding
MACS_peak_11391	chr18	75198082	75198645	+	intron (NM_027727, intron 1 of 16)	RMER10B|LTR|ERVL	19937	NM_027727	69190	Mm.173826	NM_027727	ENSMUSG00000035765	Dym	1810041M12Rik|4933427L07Rik|C030019K18Rik	dymeclin	protein-coding
MACS_peak_11392	chr18	75369745	75370483	+	intron (NM_027727, intron 14 of 16)	intron (NM_027727, intron 14 of 16)	86857	NR_045394	100503117	Mm.250517	NR_045393		2010010A06Rik	5033420E22Rik	RIKEN cDNA 2010010A06 gene	ncRNA
MACS_peak_11394	chr18	75452979	75453653	+	intron (NR_045394, intron 1 of 1)	Charlie1b|DNA|MER1_type	3655	NR_045394	100503117	Mm.250517	NR_045393		2010010A06Rik	5033420E22Rik	RIKEN cDNA 2010010A06 gene	ncRNA
MACS_peak_11396	chr18	75520245	75521028	+	Intergenic	Intergenic	-6383	NM_001042660	17131	Mm.34407	NM_008543	ENSMUSG00000025880	Smad7	Madh7	SMAD family member 7	protein-coding
MACS_peak_11397	chr18	75526233	75526911	+	promoter-TSS (NM_001042660)	promoter-TSS (NM_001042660)	-447	NM_001042660	17131	Mm.34407	NM_008543	ENSMUSG00000025880	Smad7	Madh7	SMAD family member 7	protein-coding
MACS_peak_11398	chr18	75557622	75558029	+	Intergenic	Intergenic	30806	NM_001042660	17131	Mm.34407	NM_008543	ENSMUSG00000025880	Smad7	Madh7	SMAD family member 7	protein-coding
MACS_peak_114	chr1	11735454	11736334	+	intron (NM_001160369, intron 7 of 13)	LTRIS2|LTR|ERV1	331708	NM_001160371	320492	Mm.52021	NM_177173	ENSMUSG00000057715	A830018L16Rik	-	RIKEN cDNA A830018L16 gene	protein-coding
MACS_peak_11400	chr18	75691064	75691684	+	intron (NM_201354, intron 7 of 11)	intron (NM_201354, intron 7 of 11)	17075	NR_045879	100038353	Mm.440724	NR_045879	ENSMUSG00000097712	Gm10532	ENSMUSG00000073534	predicted gene 10532	ncRNA
MACS_peak_11403	chr18	75968837	75969334	+	Intergenic	MTE-int|LTR|MaLR	-10747	NM_145356	207259	Mm.159332	NM_145356	ENSMUSG00000044646	Zbtb7c	B230208J24Rik|Kr-pok|Zbtb36	zinc finger and BTB domain containing 7C	protein-coding
MACS_peak_11407	chr18	76064388	76064873	+	intron (NM_145356, intron 2 of 4)	intron (NM_145356, intron 2 of 4)	84798	NM_145356	207259	Mm.159332	NM_145356	ENSMUSG00000044646	Zbtb7c	B230208J24Rik|Kr-pok|Zbtb36	zinc finger and BTB domain containing 7C	protein-coding
MACS_peak_1141	chr1	127429638	127430301	+	Intergenic	RLTR13D2|LTR|ERVK	-27624	NM_028787	74150	Mm.28654	NM_028787	ENSMUSG00000026342	Slc35f5	1300003P13Rik|AI646727	solute carrier family 35, member F5	protein-coding
MACS_peak_11411	chr18	76320567	76320897	+	Intergenic	CpG	-9474	NR_105776	102465184		NR_105776	miRBase:MI0021886	Mir6358	mmu-mir-6358	microRNA mir-6358	ncRNA
MACS_peak_11414	chr18	76418762	76419121	+	intron (NM_010754, intron 1 of 10)	intron (NM_010754, intron 1 of 10)	-1834	NM_001252481	17126	Mm.152699	NM_010754		Smad2	7120426M23Rik|Madh2|Madr2|Smad-2|mMad2	SMAD family member 2	protein-coding
MACS_peak_11416	chr18	76931975	76932448	+	Intergenic	Intergenic	-162933	NM_001109743	664805	Mm.329543	NM_001109743	ENSMUSG00000091519	Skor2	Corl2|EG664805|Fussel18|Gm7348	SKI family transcriptional corepressor 2	protein-coding
MACS_peak_11417	chr18	77166276	77166693	+	Intergenic	B3|SINE|B2	-2282	NM_025409	66191	Mm.28593	NM_025409	ENSMUSG00000090000	Ier3ip1	1110057H19Rik|AI644142|AL022842|AL022863|AV026606	immediate early response 3 interacting protein 1	protein-coding
MACS_peak_11418	chr18	77173156	77173639	+	intron (NM_025409, intron 1 of 2)	intron (NM_025409, intron 1 of 2)	4631	NM_025409	66191	Mm.28593	NM_025409	ENSMUSG00000090000	Ier3ip1	1110057H19Rik|AI644142|AL022842|AL022863|AV026606	immediate early response 3 interacting protein 1	protein-coding
MACS_peak_11419	chr18	77276469	77277580	+	intron (NM_027721, intron 1 of 13)	RLTR25A|LTR|ERVK	9011	NM_027721	71206	Mm.35803	NM_027721	ENSMUSG00000025420	Katnal2	3110023G01Rik|4933439B08Rik	katanin p60 subunit A-like 2	protein-coding
MACS_peak_1142	chr1	127584469	127585137	+	intron (NM_027677, intron 1 of 1)	intron (NM_027677, intron 1 of 1)	11230	NM_027677	71111	Mm.32727	NM_027677	ENSMUSG00000026343	Gpr39	4933415E13Rik	G protein-coupled receptor 39	protein-coding
MACS_peak_11420	chr18	77289559	77290200	+	Intergenic	RMER10A|LTR|ERVL	-3844	NM_027721	71206	Mm.35803	NM_027721	ENSMUSG00000025420	Katnal2	3110023G01Rik|4933439B08Rik	katanin p60 subunit A-like 2	protein-coding
MACS_peak_11421	chr18	77356041	77356481	+	intron (NM_001164167, intron 3 of 13)	intron (NM_001164167, intron 3 of 13)	51842	NM_001164168	17344	Mm.6370	NM_008602	ENSMUSG00000025423	Pias2	6330408K17Rik|AI462206|ARIP3|AU018068|Dib|Miz1|PIASxalpha|PIASxb|PIASxbeta|SIZ2	protein inhibitor of activated STAT 2	protein-coding
MACS_peak_11423	chr18	77448493	77449238	+	intron (NM_153124, intron 1 of 6)	RLTR13B1|LTR|ERVK	24279	NM_013666	225742	Mm.365178	NM_013666	ENSMUSG00000025425	St8sia5	ST8SiaV|Siat8e	ST8 alpha-N-acetyl-neuraminide alpha-2,8-sialyltransferase 5	protein-coding
MACS_peak_11425	chr18	77870745	77871233	+	Intergenic	Intergenic	-67114	NM_001164504	225743	Mm.23293	NM_001164504	ENSMUSG00000025427	Rnf165	2900024M11Rik|AI427432|Ark2c|G630064H08Rik|Gm96	ring finger protein 165	protein-coding
MACS_peak_11428	chr18	77958640	77959182	+	Intergenic	RMER10B|LTR|ERVL	5988	NR_027978	67640	Mm.482903	NM_026289		4930465K10Rik	-	RIKEN cDNA 4930465K10 gene	ncRNA
MACS_peak_11429	chr18	77995956	77996554	+	TTS (NM_146089)	TTS (NM_146089)	10264	NM_146089	225745	Mm.39293	NM_146089	ENSMUSG00000041840	Haus1	BC024400|Ccdc5|HEI-C	HAUS augmin-like complex, subunit 1	protein-coding
MACS_peak_11439	chr18	80345144	80345601	+	intron (NM_175028, intron 1 of 3)	intron (NM_175028, intron 1 of 3)	2849	NM_175028	240442	Mm.26594	NM_175028	ENSMUSG00000053950	Adnp2	8430420L05Rik|BC024969|Kiaa0863|Zfp508|mKIAA0863	ADNP homeobox 2	protein-coding
MACS_peak_11440	chr18	80354745	80355242	+	Intergenic	MER21B|LTR|ERV1	-6772	NM_175028	240442	Mm.26594	NM_175028	ENSMUSG00000053950	Adnp2	8430420L05Rik|BC024969|Kiaa0863|Zfp508|mKIAA0863	ADNP homeobox 2	protein-coding
MACS_peak_11441	chr18	80374975	80375604	+	Intergenic	ORR1E|LTR|MaLR	22069	NM_199197	68731	Mm.186936	NM_199197	ENSMUSG00000024570	Rbfa	1110032A13Rik|AI595940	ribosome binding factor A	protein-coding
MACS_peak_11444	chr18	80463237	80463808	+	intron (NM_001164420, intron 3 of 4)	B1_Mur1|SINE|Alu	10477	NM_001164423	66943	Mm.29247	NM_025861	ENSMUSG00000034006	Pqlc1	2310009N05Rik|4933425L21Rik|5730564E11Rik|C78974	PQ loop repeat containing 1	protein-coding
MACS_peak_11446	chr18	81179368	81179777	+	intron (NM_178280, intron 1 of 3)	intron (NM_178280, intron 1 of 3)	3745	NM_178280	20689	Mm.215917	NM_178280	ENSMUSG00000024565	Sall3	B130022O04Rik|Msal|Msal-1|Sal|Salt|Spalt	sal-like 3 (Drosophila)	protein-coding
MACS_peak_11447	chr18	81247974	81248475	+	Intergenic	Intergenic	-64907	NM_178280	20689	Mm.215917	NM_178280	ENSMUSG00000024565	Sall3	B130022O04Rik|Msal|Msal-1|Sal|Salt|Spalt	sal-like 3 (Drosophila)	protein-coding
MACS_peak_11448	chr18	81373325	81374089	+	Intergenic	Intergenic	-190390	NM_178280	20689	Mm.215917	NM_178280	ENSMUSG00000024565	Sall3	B130022O04Rik|Msal|Msal-1|Sal|Salt|Spalt	sal-like 3 (Drosophila)	protein-coding
MACS_peak_1145	chr1	128025522	128026322	+	intron (NM_172484, intron 5 of 14)	intron (NM_172484, intron 5 of 14)	-217131	NM_145100	72585	Mm.490405	NM_145100		Lypd1	2700050C12Rik|AI853408|C530008O16Rik|Lynx2|Lypdc1	Ly6/Plaur domain containing 1	protein-coding
MACS_peak_11450	chr18	81816907	81817649	+	Intergenic	B1F|SINE|Alu	371541	NR_039589	100628596		NR_039589	miRBase:MI0018039	Mir5127	mmu-mir-5127|mu-mir-5127	microRNA 5127	ncRNA
MACS_peak_11451	chr18	82062272	82062752	+	Intergenic	Intergenic	126307	NR_039589	100628596		NR_039589	miRBase:MI0018039	Mir5127	mmu-mir-5127|mu-mir-5127	microRNA 5127	ncRNA
MACS_peak_11453	chr18	82268028	82268480	+	Intergenic	L1Md_F2|LINE|L1	-79435	NR_039589	100628596		NR_039589	miRBase:MI0018039	Mir5127	mmu-mir-5127|mu-mir-5127	microRNA 5127	ncRNA
MACS_peak_11454	chr18	82297784	82298318	+	Intergenic	Intergenic	-109232	NR_039589	100628596		NR_039589	miRBase:MI0018039	Mir5127	mmu-mir-5127|mu-mir-5127	microRNA 5127	ncRNA
MACS_peak_1146	chr1	128266005	128266609	+	intron (NM_172484, intron 3 of 14)	intron (NM_172484, intron 3 of 14)	123197	NM_172484	210356	Mm.377234	NM_172484	ENSMUSG00000049690	Nckap5	8430408F21|D130011D22Rik|E030049G20Rik|Erih1|Erih2|Gm1548|Nap5	NCK-associated protein 5	protein-coding
MACS_peak_11463	chr18	83085100	83085748	+	intron (NM_001177464, intron 1 of 5)	intron (NM_001177464, intron 1 of 5)	1400	NM_001177464	329003	Mm.326526	NM_183033	ENSMUSG00000058881	Zfp516	C330029B10Rik|D230016L03|Zfp26l|Znf516|mKIAA0222	zinc finger protein 516	protein-coding
MACS_peak_11469	chr18	83561454	83562279	+	Intergenic	Intergenic	-66590	NR_045361	70960	Mm.410834	NR_045361		4921531P14Rik	1700108N05Rik	RIKEN cDNA 4921531P14 gene	ncRNA
MACS_peak_11470	chr18	83568723	83569015	+	Intergenic	Intergenic	-73593	NR_045361	70960	Mm.410834	NR_045361		4921531P14Rik	1700108N05Rik	RIKEN cDNA 4921531P14 gene	ncRNA
MACS_peak_11472	chr18	84078099	84078574	+	Intergenic	Intergenic	177618	NM_001081300	110796	Mm.102136	NM_001081300	ENSMUSG00000046982	Tshz1	5730407I04Rik|D18Bwg1409e|Mtsh1|NY-CO-33|Sdccag33|Tsh1|mKIAA4206|teashirt1	teashirt zinc finger family member 1	protein-coding
MACS_peak_11473	chr18	84216452	84216967	+	intron (NM_001081300, intron 1 of 1)	intron (NM_001081300, intron 1 of 1)	39245	NM_001081300	110796	Mm.102136	NM_001081300	ENSMUSG00000046982	Tshz1	5730407I04Rik|D18Bwg1409e|Mtsh1|NY-CO-33|Sdccag33|Tsh1|mKIAA4206|teashirt1	teashirt zinc finger family member 1	protein-coding
MACS_peak_11475	chr18	84564774	84565023	+	intron (NM_001033341, intron 4 of 8)	intron (NM_001033341, intron 4 of 8)	193998	NM_001033341	240476	Mm.329575	NM_001033341	ENSMUSG00000048410	Zfp407	6430585N13Rik|Gm333|Gm334|Gm948|ZNF407	zinc finger protein 407	protein-coding
MACS_peak_11476	chr18	84875595	84876029	+	Intergenic	ORR1D1|LTR|MaLR	-13822	NM_173770	240479	Mm.472378	NM_173770	ENSMUSG00000047992	Fam69c	B230399E16Rik	family with sequence similarity 69, member C	protein-coding
MACS_peak_11477	chr18	84877527	84878151	+	Intergenic	Intergenic	-11795	NM_173770	240479	Mm.472378	NM_173770	ENSMUSG00000047992	Fam69c	B230399E16Rik	family with sequence similarity 69, member C	protein-coding
MACS_peak_11478	chr18	85102891	85104482	+	promoter-TSS (NM_015798)	promoter-TSS (NM_015798)	-731	NM_015798	50764	Mm.28369	NM_015798	ENSMUSG00000034391	Fbxo15	AU019763|Fbx15|ecat3	F-box protein 15	protein-coding
MACS_peak_11481	chr18	85139837	85140370	+	intron (NM_015798, intron 8 of 9)	intron (NM_015798, intron 8 of 9)	-19187	NM_025969	67105	Mm.250617	NM_025969	ENSMUSG00000024645	Timm21	1700034H14Rik|2700002I20Rik	tranlocase of inner mitochondrial membrane 21	protein-coding
MACS_peak_11485	chr18	85803012	85803420	+	Intergenic	Intergenic	-682300	NM_025969	67105	Mm.250617	NM_025969	ENSMUSG00000024645	Timm21	1700034H14Rik|2700002I20Rik	tranlocase of inner mitochondrial membrane 21	protein-coding
MACS_peak_11489	chr18	87169997	87170948	+	Intergenic	Intergenic	288032	NM_172633	12405	Mm.70775	NM_172633	ENSMUSG00000024647	Cbln2	6330593N19Rik|A730004O05	cerebellin 2 precursor protein	protein-coding
MACS_peak_11498	chr18	89240792	89241294	+	intron (NM_175542, intron 32 of 48)	RLTR13D6|LTR|ERVK	99621	NR_105777	102466633		NR_105777		Mir6359	mmu-mir-6359	microRNA mir-6359	ncRNA
MACS_peak_11509	chr19	3320781	3321232	+	Intergenic	B3A|SINE|B2	-2295	NM_013495	12894	Mm.18522	NM_013495	ENSMUSG00000024900	Cpt1a	C730027G07|CPTI|Cpt1	carnitine palmitoyltransferase 1a, liver	protein-coding
MACS_peak_11512	chr19	3548368	3548699	+	intron (NM_029456, intron 1 of 22)	RMER6B|LTR|ERVK	27216	NM_001164159	52036	Mm.284686	NM_028999	ENSMUSG00000024908	Ppp6r3	4930528G08Rik|9130026N02Rik|D19Bwg1430e|D19Ertd703e|Pp6r3|Ppcs3|Pptcs3|Sapl|Saps3|mKIAA1558	protein phosphatase 6, regulatory subunit 3	protein-coding
MACS_peak_11516	chr19	4059120	4059551	+	promoter-TSS (NM_144869)	promoter-TSS (NM_144869)	-41	NM_144869	225884	Mm.440201	NM_144869	ENSMUSG00000058216	BC021614	-	cDNA sequence BC021614	protein-coding
MACS_peak_11517	chr19	4117194	4117788	+	intron (NM_001276284, intron 2 of 5)	intron (NM_001276284, intron 2 of 5)	4084	NM_001276284	11632	Mm.10433	NM_016666	ENSMUSG00000024847	Aip	AA408703|AW476050|Ara9|D19Bwg1412e|Fkbp16|Xap2	aryl-hydrocarbon receptor-interacting protein	protein-coding
MACS_peak_11518	chr19	4125657	4126004	+	promoter-TSS (NM_016666)	promoter-TSS (NM_016666)	28	NM_016666	11632	Mm.10433	NM_016666	ENSMUSG00000024847	Aip	AA408703|AW476050|Ara9|D19Bwg1412e|Fkbp16|Xap2	aryl-hydrocarbon receptor-interacting protein	protein-coding
MACS_peak_11519	chr19	4145917	4146460	+	TTS (NM_206973)	TTS (NM_206973)	-2475	NM_011778	23789	Mm.276859	NM_011778	ENSMUSG00000024835	Coro1b	-	coronin, actin binding protein 1B	protein-coding
MACS_peak_1152	chr1	129677359	129677862	+	intron (NM_028399, intron 2 of 8)	intron (NM_028399, intron 2 of 8)	6869	NM_028399	72949	Mm.268672	NM_028399		Ccnt2	2900041I18Rik|C81304|CycT2|CycT2a|CycT2b	cyclin T2	protein-coding
MACS_peak_11522	chr19	4168705	4169282	+	intron (NM_134148, intron 9 of 9)	B2_Mm1t|SINE|B2	-5748	NM_021485	58988	Mm.271937	NM_021485	ENSMUSG00000024830	Rps6kb2	70kDa|S6K2	ribosomal protein S6 kinase, polypeptide 2	protein-coding
MACS_peak_11523	chr19	4309993	4310425	+	Intergenic	B2_Mm1a|SINE|B2	-3987	NM_001290818	110355	Mm.254144	NM_130863	ENSMUSG00000024858	Adrbk1	Adrbk-1|Bark-1|GRK2|beta ARK|betaARK1	adrenergic receptor kinase, beta 1	protein-coding
MACS_peak_11527	chr19	4785200	4785759	+	3' UTR (NM_001290122, exon 4 of 4)	3' UTR (NM_001290122, exon 4 of 4)	8422	NM_009032	19653	Mm.426069	NM_009032	ENSMUSG00000094936	Rbm4	4921506I22Rik|Lark1|Mlark|Rbm4a|lark	RNA binding motif protein 4	protein-coding
MACS_peak_11528	chr19	4810157	4810967	+	intron (NM_019869, intron 1 of 2)	intron (NM_019869, intron 1 of 2)	1072	NM_001290127	102902673	Mm.426069	NM_001290127		Rbm14-rbm4	-	Rbm14-Rbm4 readthrough	protein-coding
MACS_peak_11529	chr19	4838874	4839648	+	promoter-TSS (NM_016892)	promoter-TSS (NM_016892)	61	NM_016892	12460	Mm.434411	NM_016892	ENSMUSG00000034108	Ccs	Ccsd	copper chaperone for superoxide dismutase	protein-coding
MACS_peak_11531	chr19	4896554	4897292	+	intron (NM_001033128, intron 11 of 16)	Lx8|LINE|L1	9704	NM_001033128	52028	Mm.23636	NM_001033128	ENSMUSG00000006464	Bbs1	AI451249|D19Ertd609e	Bardet-Biedl syndrome 1 (human)	protein-coding
MACS_peak_11532	chr19	4961664	4962358	+	promoter-TSS (NM_025553)	promoter-TSS (NM_025553)	-295	NM_025553	66419	Mm.28494	NM_025553	ENSMUSG00000024902	Mrpl11	2410001P07Rik|L11mt	mitochondrial ribosomal protein L11	protein-coding
MACS_peak_11534	chr19	4989045	4989507	+	intron (NM_153553, intron 1 of 7)	intron (NM_153553, intron 1 of 7)	695	NM_153553	225872	Mm.287867	NM_153553	ENSMUSG00000045903	Npas4	LE-PAS|Nxf	neuronal PAS domain protein 4	protein-coding
MACS_peak_11535	chr19	5010000	5010593	+	Intergenic	RLTR46|LTR|ERVK	-13710	NM_007854	13340	Mm.4930	NM_007854	ENSMUSG00000024891	Slc29a2	Der12|Ent2|Hnp36	solute carrier family 29 (nucleoside transporters), member 2	protein-coding
MACS_peak_11538	chr19	5044667	5045017	+	intron (NM_134155, intron 1 of 9)	B3|SINE|B2	3438	NM_134155	107392	Mm.29628	NM_134155	ENSMUSG00000080268	Brms1	AV003220|AW554636	breast cancer metastasis-suppressor 1	protein-coding
MACS_peak_11539	chr19	5087835	5088450	+	promoter-TSS (NM_026553)	promoter-TSS (NM_026553)	-396	NM_026553	68090	Mm.44202	NM_026553	ENSMUSG00000024875	Yif1a	5330422J23Rik|54TM|Yif1|Yif1p	Yip1 interacting factor homolog A (S. cerevisiae)	protein-coding
MACS_peak_1154	chr1	129801363	129801850	+	intron (NM_178690, intron 7 of 23)	ORR1D1|LTR|MaLR	36256	NM_178690	226407	Mm.489713	NM_178690	ENSMUSG00000036104	Rab3gap1	1700003B17Rik|4732493F09Rik|AL117896|Rab3gap|p130	RAB3 GTPase activating protein subunit 1	protein-coding
MACS_peak_11540	chr19	5224596	5225453	+	intron (NM_153129, intron 1 of 23)	RLTR9B2|LTR|ERVK	48095	NM_153129	107975	Mm.234923	NM_153129	ENSMUSG00000024855	Pacs1	AI325977	phosphofurin acidic cluster sorting protein 1	protein-coding
MACS_peak_11548	chr19	5797585	5798414	+	non-coding (NR_002847, exon 1 of 1)	non-coding (NR_002847, exon 1 of 1)	4672	NR_002847	72289	Mm.298256	NR_002847	ENSMUSG00000092341	Malat1	2210401K01Rik|9430072K23Rik|AI647968|Neat2	metastasis associated lung adenocarcinoma transcript 1 (non-coding RNA)	ncRNA
MACS_peak_11551	chr19	5809423	5809955	+	Intergenic	Intergenic	-7018	NR_002847	72289	Mm.298256	NR_002847	ENSMUSG00000092341	Malat1	2210401K01Rik|9430072K23Rik|AI647968|Neat2	metastasis associated lung adenocarcinoma transcript 1 (non-coding RNA)	ncRNA
MACS_peak_11554	chr19	5849143	5849995	+	Intergenic	Intergenic	-4091	NR_003513	66961	Mm.281895	NR_003513		Neat1	2310043N10Rik|VINC	nuclear paraspeckle assembly transcript 1 (non-protein coding)	ncRNA
MACS_peak_11556	chr19	5956326	5957069	+	intron (NM_001164057, intron 4 of 17)	intron (NM_001164057, intron 4 of 17)	7509	NM_001164057	18969	Mm.209931	NM_008893	ENSMUSG00000024833	Pola2	AI573378	polymerase (DNA directed), alpha 2	protein-coding
MACS_peak_11558	chr19	6018070	6018590	+	non-coding (NR_045783, exon 5 of 5)	non-coding (NR_045783, exon 5 of 5)	-2505	NM_001110504	12333	Mm.6221	NM_007600	ENSMUSG00000024942	Capn1	Capa-1|Capa1|mu-calpin	calpain 1	protein-coding
MACS_peak_11560	chr19	6085159	6085841	+	promoter-TSS (NM_024231)	promoter-TSS (NM_024231)	403	NM_026410	67849	Mm.23526	NM_026410	ENSMUSG00000024791	Cdca5	2610036L13Rik|AL024086|AW536684|C85404	cell division cycle associated 5	protein-coding
MACS_peak_11562	chr19	6411190	6411885	+	intron (NM_011242, intron 12 of 16)	L1M5|LINE|L1	-7201	NM_001205235	18190	Mm.329616	NM_020253	ENSMUSG00000033768	Nrxn2	6430591O13Rik|mKIAA0921	neurexin II	protein-coding
MACS_peak_11565	chr19	6675574	6676041	+	Intergenic	Intergenic	-132737	NM_009203	20521	Mm.391146	NM_009203	ENSMUSG00000061742	Slc22a12	AI987855|OAT4L|Rst|Slc22al2|URAT1	solute carrier family 22 (organic anion/cation transporter), member 12	protein-coding
MACS_peak_1157	chr1	130288782	130289521	+	intron (NM_177445, intron 4 of 15)	intron (NM_177445, intron 4 of 15)	24842	NM_177445	226414	Mm.28693	NM_145507	ENSMUSG00000026356	Dars	5730439G15Rik	aspartyl-tRNA synthetase	protein-coding
MACS_peak_11570	chr19	7335664	7336585	+	Intergenic	MTD|LTR|MaLR	-8130	NM_054048	104383	Mm.283859	NM_054048	ENSMUSG00000024968	Rcor2	1A13|AW122124|CoREST|Rcor|Rcor1	REST corepressor 2	protein-coding
MACS_peak_11571	chr19	7479101	7479548	+	Intergenic	Intergenic	-12791	NM_175381	108899	Mm.386838	NM_175381	ENSMUSG00000053080	2700081O15Rik	AI255177|AI848741|AW742297	RIKEN cDNA 2700081O15 gene	protein-coding
MACS_peak_11574	chr19	7657487	7658603	+	intron (NM_139269, intron 4 of 4)	intron (NM_139269, intron 4 of 4)	23621	NM_019516	56072	Mm.298242	NM_019516	ENSMUSG00000024972	Lgals12	AW987437|Grip1	lectin, galactose binding, soluble 12	protein-coding
MACS_peak_1158	chr1	130296872	130297499	+	intron (NM_177445, intron 4 of 15)	intron (NM_177445, intron 4 of 15)	16808	NM_177445	226414	Mm.28693	NM_145507	ENSMUSG00000026356	Dars	5730439G15Rik	aspartyl-tRNA synthetase	protein-coding
MACS_peak_11580	chr19	8571881	8572573	+	Intergenic	RLTR13D6|LTR|ERVK	-92632	NM_177002	319800	Mm.426083	NM_177002	ENSMUSG00000052562	Slc22a30	AA986766|C730048C13Rik|UST1R	solute carrier family 22, member 30	protein-coding
MACS_peak_11581	chr19	8767136	8767723	+	Intergenic	RLTR11A2|LTR|ERVK	20958	NM_008577	17254	Mm.4114	NM_008577	ENSMUSG00000010095	Slc3a2	4F2|4F2HC|AI314110|Cd98|Ly-10|Ly-m10|Ly10|Mdu1|Mgp-2hc|NACAE	solute carrier family 3 (activators of dibasic and neutral amino acid transport), member 2	protein-coding
MACS_peak_11582	chr19	8787002	8787792	+	intron (NM_001161413, intron 2 of 9)	intron (NM_001161413, intron 2 of 9)	990	NM_008577	17254	Mm.4114	NM_008577	ENSMUSG00000010095	Slc3a2	4F2|4F2HC|AI314110|Cd98|Ly-10|Ly-m10|Ly10|Mdu1|Mgp-2hc|NACAE	solute carrier family 3 (activators of dibasic and neutral amino acid transport), member 2	protein-coding
MACS_peak_11584	chr19	8792747	8793374	+	intron (NM_001161413, intron 1 of 9)	intron (NM_001161413, intron 1 of 9)	-4673	NM_008577	17254	Mm.4114	NM_008577	ENSMUSG00000010095	Slc3a2	4F2|4F2HC|AI314110|Cd98|Ly-10|Ly-m10|Ly10|Mdu1|Mgp-2hc|NACAE	solute carrier family 3 (activators of dibasic and neutral amino acid transport), member 2	protein-coding
MACS_peak_11585	chr19	8797522	8798179	+	promoter-TSS (NR_002896)	promoter-TSS (NR_002896)	9	NM_001161413	17254	Mm.4114	NM_008577	ENSMUSG00000010095	Slc3a2	4F2|4F2HC|AI314110|Cd98|Ly-10|Ly-m10|Ly10|Mdu1|Mgp-2hc|NACAE	solute carrier family 3 (activators of dibasic and neutral amino acid transport), member 2	protein-coding
MACS_peak_11587	chr19	8801367	8802622	+	Intergenic	L1Md_F2|LINE|L1	1638	NR_004445	100127111	Mm.292489	NR_004445	ENSMUSG00000065087	Snord22	Rnu22|U22	small nucleolar RNA, C/D box 22	snoRNA
MACS_peak_11588	chr19	8911294	8911988	+	promoter-TSS (NM_001136064)	promoter-TSS (NM_001136064)	-316	NM_001136064	14705	Mm.345134	NM_008144	ENSMUSG00000071657	Bscl2	2900097C17Rik|AI046355|Gng3lg	Berardinelli-Seip congenital lipodystrophy 2 homolog (seipin)	protein-coding
MACS_peak_11589	chr19	8945469	8946082	+	promoter-TSS (NM_146093)	promoter-TSS (NM_146093)	-274	NM_146093	225896	Mm.27839	NM_146093	ENSMUSG00000071655	Ubxn1	2B28|4930455J02Rik|D19Ertd721e|T25529	UBX domain protein 1	protein-coding
MACS_peak_1159	chr1	130756537	130757154	+	Intergenic	Intergenic	-267969	NM_009911	12767	Mm.1401	NM_009911	ENSMUSG00000045382	Cxcr4	CD184|Cmkar4|LESTR|PB-CKR|PBSF/SDF-1|Sdf1r|b2b220Clo	chemokine (C-X-C motif) receptor 4	protein-coding
MACS_peak_11590	chr19	8946848	8947531	+	intron (NM_146093, intron 5 of 9)	B1_Mm|SINE|Alu	1140	NM_146093	225896	Mm.27839	NM_146093	ENSMUSG00000071655	Ubxn1	2B28|4930455J02Rik|D19Ertd721e|T25529	UBX domain protein 1	protein-coding
MACS_peak_11591	chr19	8961843	8963241	+	promoter-TSS (NM_025463)	promoter-TSS (NM_025463)	718	NR_027866	67531	Mm.475113	NR_027866		5730408K05Rik	2610018C13Rik	RIKEN cDNA 5730408K05 gene	ncRNA
MACS_peak_11592	chr19	8972095	8972558	+	promoter-TSS (NM_001293621)	promoter-TSS (NM_001293621)	-221	NM_001293621	14376	Mm.3196	NM_008060	ENSMUSG00000071650	Ganab	AU042638|G2an|GluII|mKIAA0088	alpha glucosidase 2 alpha neutral subunit	protein-coding
MACS_peak_11597	chr19	9586386	9586894	+	Intergenic	RLTR13D6|LTR|ERVK	47098	NR_073559	619371	Mm.316894	NM_001030317	ENSMUSG00000071640	Stxbp3b	Munc18c(L)|Stxbp3-1	syntaxin-binding protein 3B	pseudo
MACS_peak_11601	chr19	9935176	9935720	+	Intergenic	RLTR13D3|LTR|ERVK	38575	NM_016692	16319	Mm.29755	NM_016692	ENSMUSG00000024660	Incenp	2700067E22Rik|AU019509|C130081E20|C77457	inner centromere protein	protein-coding
MACS_peak_11603	chr19	10256953	10257460	+	promoter-TSS (NM_146094)	promoter-TSS (NM_146094)	-172	NM_146094	76267	Mm.30158	NM_146094	ENSMUSG00000010663	Fads1	0710001O03Rik|A930006B21Rik|AI317215|DSD	fatty acid desaturase 1	protein-coding
MACS_peak_11606	chr19	10315575	10316027	+	promoter-TSS (NM_001033481)	promoter-TSS (NM_001033481)	-563	NM_001033481	225908	Mm.329716	NM_001033481	ENSMUSG00000036098	Myrf	6030439E18|Gm1804|Gm98|Mrf	myelin regulatory factor	protein-coding
MACS_peak_11608	chr19	10447509	10448193	+	Intergenic	ORR1C2|LTR|MaLR	-15729	NM_018801	54525	Mm.182654	NM_018801	ENSMUSG00000024743	Syt7	AI851541|B230112P13Rik	synaptotagmin VII	protein-coding
MACS_peak_1161	chr1	130828470	130828839	+	Intergenic	BGLII|LTR|ERVK	-339778	NM_009911	12767	Mm.1401	NM_009911	ENSMUSG00000045382	Cxcr4	CD184|Cmkar4|LESTR|PB-CKR|PBSF/SDF-1|Sdf1r|b2b220Clo	chemokine (C-X-C motif) receptor 4	protein-coding
MACS_peak_11611	chr19	10477461	10477939	+	intron (NM_173067, intron 1 of 9)	intron (NM_173067, intron 1 of 9)	14120	NM_173068	54525	Mm.182654	NM_018801	ENSMUSG00000024743	Syt7	AI851541|B230112P13Rik	synaptotagmin VII	protein-coding
MACS_peak_11613	chr19	10651651	10652168	+	promoter-TSS (NM_028411)	promoter-TSS (NM_028411)	262	NM_001282067	225912	Mm.252701	NM_201351	ENSMUSG00000034445	Cyb561a3	2310004G04Rik|Cybasc3|Lcytb	cytochrome b561 family, member A3	protein-coding
MACS_peak_11616	chr19	11046967	11047766	+	intron (NM_023529, intron 1 of 8)	ORR1C2|LTR|MaLR	1794	NM_023529	69826	Mm.273404	NM_023529	ENSMUSG00000024731	Ms4a10	2010001N17Rik	membrane-spanning 4-domains, subfamily A, member 10	protein-coding
MACS_peak_11617	chr19	11373281	11374603	+	non-coding (NR_045317, exon 3 of 3)	non-coding (NR_045317, exon 3 of 3)	-15639	NM_183190	269063	Mm.268940	NM_183190	ENSMUSG00000054523	Ms4a5	-	membrane-spanning 4-domains, subfamily A, member 5	protein-coding
MACS_peak_1162	chr1	130898390	130898797	+	Intergenic	B4A|SINE|B4	-271288	NM_172485	210417	Mm.380518	NM_172485	ENSMUSG00000042581	Thsd7b	1700074E13Rik|B930082A18|D130067I03Rik	thrombospondin, type I, domain containing 7B	protein-coding
MACS_peak_11622	chr19	11897789	11898387	+	Intergenic	Intergenic	-4195	NM_001025307	20908	Mm.272264	NM_011502	ENSMUSG00000041488	Stx3	Syn-3	syntaxin 3	protein-coding
MACS_peak_11627	chr19	12273550	12274367	+	Intergenic	RLTR13D6|LTR|ERVK	-10100	NM_146414	258409	Mm.417822	NM_146414	ENSMUSG00000094133	Olfr1431	MOR214-5	olfactory receptor 1431	protein-coding
MACS_peak_11629	chr19	12705983	12706418	+	Intergenic	Intergenic	-1598	NM_145935	107146	Mm.39974	NM_145935		Glyat	A330009E03Rik|ACGNAT|AI195249|AI315345|CAT|GAT	glycine-N-acyltransferase	protein-coding
MACS_peak_11631	chr19	12870350	12870796	+	promoter-TSS (NM_053009)	promoter-TSS (NM_053009)	40	NR_024093	664779	Mm.290924	NM_001039718		Zfp91Cntf	Zfp91-Cntf	Zfp91-Cntf readthrough transcript (NMD candidate)	ncRNA
MACS_peak_11632	chr19	12870857	12871318	+	promoter-TSS (NM_053009)	promoter-TSS (NM_053009)	-474	NM_053009	109910	Mm.290924	NM_053009	ENSMUSG00000024695	Zfp91	9130014I08Rik|A530054C17Rik|AL024263|AW545902|Pzf|Zfp-91	zinc finger protein 91	protein-coding
MACS_peak_11637	chr19	13879829	13880671	+	Intergenic	RLTR13D6|LTR|ERVK	9828	NM_146796	258792	Mm.377693	NM_146796	ENSMUSG00000045395	Olfr1499	MOR211-2	olfactory receptor 1499	protein-coding
MACS_peak_11639	chr19	14597004	14597581	+	intron (NM_011600, intron 6 of 19)	L1_Mm|LINE|L1	75181	NM_011600	21888	Mm.103638	NM_011600	ENSMUSG00000024642	Tle4	5730411M05Rik|AA792082|Bce-1|Bce1|ESTM13|ESTM14|Grg4|X83332|X83333	transducin-like enhancer of split 4, homolog of Drosophila E(spl)	protein-coding
MACS_peak_11641	chr19	14617985	14618405	+	intron (NM_011600, intron 6 of 19)	intron (NM_011600, intron 6 of 19)	54278	NM_011600	21888	Mm.103638	NM_011600	ENSMUSG00000024642	Tle4	5730411M05Rik|AA792082|Bce-1|Bce1|ESTM13|ESTM14|Grg4|X83332|X83333	transducin-like enhancer of split 4, homolog of Drosophila E(spl)	protein-coding
MACS_peak_11643	chr19	14711507	14711979	+	Intergenic	Intergenic	-39270	NM_011600	21888	Mm.103638	NM_011600	ENSMUSG00000024642	Tle4	5730411M05Rik|AA792082|Bce-1|Bce1|ESTM13|ESTM14|Grg4|X83332|X83333	transducin-like enhancer of split 4, homolog of Drosophila E(spl)	protein-coding
MACS_peak_11645	chr19	14751265	14751943	+	Intergenic	RLTR11B|LTR|ERVK	-79131	NM_011600	21888	Mm.103638	NM_011600	ENSMUSG00000024642	Tle4	5730411M05Rik|AA792082|Bce-1|Bce1|ESTM13|ESTM14|Grg4|X83332|X83333	transducin-like enhancer of split 4, homolog of Drosophila E(spl)	protein-coding
MACS_peak_11647	chr19	14909921	14910567	+	Intergenic	RLTR9E|LTR|ERVK	-237771	NM_011600	21888	Mm.103638	NM_011600	ENSMUSG00000024642	Tle4	5730411M05Rik|AA792082|Bce-1|Bce1|ESTM13|ESTM14|Grg4|X83332|X83333	transducin-like enhancer of split 4, homolog of Drosophila E(spl)	protein-coding
MACS_peak_11648	chr19	15253523	15253892	+	Intergenic	BGLII|LTR|ERVK	-581234	NM_011600	21888	Mm.103638	NM_011600	ENSMUSG00000024642	Tle4	5730411M05Rik|AA792082|Bce-1|Bce1|ESTM13|ESTM14|Grg4|X83332|X83333	transducin-like enhancer of split 4, homolog of Drosophila E(spl)	protein-coding
MACS_peak_11651	chr19	16017133	16017872	+	Intergenic	RLTR20B3|LTR|ERVK	-17953	NM_177420	107272	Mm.289936	NM_177420	ENSMUSG00000024640	Psat1	D8Ertd814e|EPIP|PSA|Psat	phosphoserine aminotransferase 1	protein-coding
MACS_peak_11652	chr19	16533684	16534328	+	intron (NM_008137, intron 1 of 6)	intron (NM_008137, intron 1 of 6)	23849	NM_008137	14675	Mm.313181	NM_008137	ENSMUSG00000024697	Gna14	AU023208	guanine nucleotide binding protein, alpha 14	protein-coding
MACS_peak_11654	chr19	16566035	16566661	+	intron (NM_008137, intron 1 of 6)	intron (NM_008137, intron 1 of 6)	56191	NM_008137	14675	Mm.313181	NM_008137	ENSMUSG00000024697	Gna14	AU023208	guanine nucleotide binding protein, alpha 14	protein-coding
MACS_peak_11656	chr19	17121278	17121856	+	intron (NM_181348, intron 6 of 19)	(CAGGG)n|Simple_repeat|Simple_repeat	90959	NM_181348	353211	Mm.257354	NM_181348	ENSMUSG00000039126	Prune2	6330414G02Rik|A230083H22Rik|A330102H22Rik|Bmcc1|mKIAA0367	prune homolog 2 (Drosophila)	protein-coding
MACS_peak_11658	chr19	17198668	17199114	+	exon (NM_181348, exon 8 of 20)	exon (NM_181348, exon 8 of 20)	168283	NM_181348	353211	Mm.257354	NM_181348	ENSMUSG00000039126	Prune2	6330414G02Rik|A230083H22Rik|A330102H22Rik|Bmcc1|mKIAA0367	prune homolog 2 (Drosophila)	protein-coding
MACS_peak_11659	chr19	17212569	17213515	+	intron (NM_181348, intron 9 of 19)	intron (NM_181348, intron 9 of 19)	182434	NM_181348	353211	Mm.257354	NM_181348	ENSMUSG00000039126	Prune2	6330414G02Rik|A230083H22Rik|A330102H22Rik|Bmcc1|mKIAA0367	prune homolog 2 (Drosophila)	protein-coding
MACS_peak_11662	chr19	18682327	18683115	+	intron (NM_017375, intron 1 of 9)	intron (NM_017375, intron 1 of 9)	23582	NM_017375	20409	Mm.172222	NM_017375		Ostf1	C78236|SH3P2|Sh3d3	osteoclast stimulating factor 1	protein-coding
MACS_peak_11666	chr19	19679857	19680300	+	Intergenic	Intergenic	-494392	NM_001043354	225998	Mm.234641	NM_146095	ENSMUSG00000036192	Rorb	Nr1f2|RZR-beta|RZRB|Rorbeta	RAR-related orphan receptor beta	protein-coding
MACS_peak_1167	chr1	132248395	132248973	+	Intergenic	RLTR25B|LTR|ERVK	70892	NM_007827	13137	Mm.436759	NM_007827	ENSMUSG00000026401	Daf2	AI323748|Cd55b|Daf|Daf-TM|TM-DAF	decay accelerating factor 2	protein-coding
MACS_peak_11670	chr19	20998031	20998728	+	intron (NM_028953, intron 2 of 20)	intron (NM_028953, intron 2 of 20)	30313	NM_028953	13409	Mm.219585	NM_028953	ENSMUSG00000024749	Tmc1	4933416G09Rik|Beethoven|Bth|CWEA1|dn	transmembrane channel-like gene family 1	protein-coding
MACS_peak_11671	chr19	20998797	20999424	+	intron (NM_028953, intron 2 of 20)	intron (NM_028953, intron 2 of 20)	29582	NM_028953	13409	Mm.219585	NM_028953	ENSMUSG00000024749	Tmc1	4933416G09Rik|Beethoven|Bth|CWEA1|dn	transmembrane channel-like gene family 1	protein-coding
MACS_peak_11672	chr19	21012209	21012819	+	intron (NM_028953, intron 2 of 20)	intron (NM_028953, intron 2 of 20)	16178	NM_028953	13409	Mm.219585	NM_028953	ENSMUSG00000024749	Tmc1	4933416G09Rik|Beethoven|Bth|CWEA1|dn	transmembrane channel-like gene family 1	protein-coding
MACS_peak_11674	chr19	21447736	21448139	+	Intergenic	Intergenic	99214	NM_010266	14544	Mm.45054	NM_010266	ENSMUSG00000058624	Gda	AU015411|AW047581	guanine deaminase	protein-coding
MACS_peak_11680	chr19	21969220	21969792	+	Intergenic	Intergenic	116676	NM_031997	83921	Mm.329776	NM_031997	ENSMUSG00000024754	Tmem2	-	transmembrane protein 2	protein-coding
MACS_peak_11682	chr19	22539506	22539985	+	intron (NM_177341, intron 1 of 26)	IAPEY2_LTR|LTR|ERVK	17047	NM_177341	226025	Mm.131943	NM_177341	ENSMUSG00000052387	Trpm3	6330504P12Rik|9330180E14|AU018608|B930001P07Rik|LTRPC3|MLSN2	transient receptor potential cation channel, subfamily M, member 3	protein-coding
MACS_peak_11687	chr19	23150166	23150949	+	Intergenic	MTEb-int|LTR|MaLR	-65159	NM_010638	16601	Mm.291595	NM_010638	ENSMUSG00000033863	Klf9	2310051E17Rik|AA589643|BTEB-1|Bteb1|ENSMUSG00000055440|Gm9971	Kruppel-like factor 9	protein-coding
MACS_peak_11689	chr19	23164065	23164799	+	Intergenic	B1_Mur3|SINE|Alu	-51284	NM_010638	16601	Mm.291595	NM_010638	ENSMUSG00000033863	Klf9	2310051E17Rik|AA589643|BTEB-1|Bteb1|ENSMUSG00000055440|Gm9971	Kruppel-like factor 9	protein-coding
MACS_peak_11690	chr19	23169086	23170216	+	Intergenic	RMER16|LTR|ERVK	-46065	NM_010638	16601	Mm.291595	NM_010638	ENSMUSG00000033863	Klf9	2310051E17Rik|AA589643|BTEB-1|Bteb1|ENSMUSG00000055440|Gm9971	Kruppel-like factor 9	protein-coding
MACS_peak_11694	chr19	23226618	23227012	+	intron (NM_010638, intron 1 of 1)	intron (NM_010638, intron 1 of 1)	2894	NR_035423	100316672		NR_035423		Mir1192	Mirn1192|mmu-mir-1192	microRNA 1192	ncRNA
MACS_peak_11695	chr19	23542162	23542786	+	Intergenic	Intergenic	-19662	NM_174857	71738	Mm.50841	NM_174857	ENSMUSG00000033207	Mamdc2	1200015L10Rik|AI591564|mamcan	MAM domain containing 2	protein-coding
MACS_peak_11696	chr19	23659603	23660108	+	intron (NM_026188, intron 4 of 5)	MLT2B2|LTR|ERVL	67447	NM_026188	67483	Mm.443287	NM_026188	ENSMUSG00000033053	1700028P14Rik	AV209940	RIKEN cDNA 1700028P14 gene	protein-coding
MACS_peak_11698	chr19	24138987	24139549	+	Intergenic	Intergenic	-33759	NM_001114174	381217	Mm.426078	NM_001114174	ENSMUSG00000071604	Fam189a2	AI414343|AI666772|Gm967	family with sequence similarity 189, member A2	protein-coding
MACS_peak_11699	chr19	24292690	24293295	+	intron (NM_011597, intron 1 of 22)	B2_Mm2|SINE|B2	6524	NM_011597	21873	Mm.104744	NM_011597	ENSMUSG00000024812	Tjp2	ZO-2	tight junction protein 2	protein-coding
MACS_peak_11704	chr19	24566934	24567324	+	intron (NM_008846, intron 1 of 14)	intron (NM_008846, intron 1 of 14)	-15165	NM_026520	68034	Mm.440181	NM_026520		Fam122a	2410124L17Rik|2900009I07Rik|ENSMUSG00000051082|Gm9849	family with sequence similarity 122, member A	protein-coding
MACS_peak_11707	chr19	25553475	25554200	+	Intergenic	ORR1C2|LTR|MaLR	-26359	NM_015826	50796	Mm.391208	NM_015826	ENSMUSG00000024837	Dmrt1	-	doublesex and mab-3 related transcription factor 1	protein-coding
MACS_peak_1171	chr1	132445986	132446313	+	Intergenic	B1_Mm|SINE|Alu	80034	NM_009581	22789	Mm.4644	NM_009581	ENSMUSG00000042554	Zp3r	AV264399|SP56	zona pellucida 3 receptor	protein-coding
MACS_peak_11712	chr19	26695766	26696267	+	intron (NM_011416, intron 2 of 32)	MLT2B1|LTR|ERVL	16366	NM_011416	67155	Mm.491146	NM_011416	ENSMUSG00000024921	Smarca2	2610209L14Rik|SNF2alpha|Snf2l2|brahma|brm	SWI/SNF related, matrix associated, actin dependent regulator of chromatin, subfamily a, member 2	protein-coding
MACS_peak_11713	chr19	26919489	26920111	+	Intergenic	Intergenic	-21403	NR_045306	70942	Mm.411548	NR_045306	ENSMUSG00000093772	4931403E22Rik	-	RIKEN cDNA 4931403E22 gene	ncRNA
MACS_peak_11715	chr19	27445409	27445779	+	Intergenic	Intergenic	48485	NM_183179	240595	Mm.269759	NM_183179	ENSMUSG00000047298	Kcnv2	KV11.1	potassium channel, subfamily V, member 2	protein-coding
MACS_peak_11716	chr19	27621519	27622140	+	Intergenic	Intergenic	117302	NR_027987	107372	Mm.17942	NM_175354		C030016D13Rik	AW413347	RIKEN cDNA C030016D13 gene	ncRNA
MACS_peak_1172	chr1	132634251	132634750	+	intron (NM_177604, intron 2 of 3)	intron (NM_177604, intron 2 of 3)	5947	NM_177604	212439	Mm.268547	NM_177604	ENSMUSG00000042510	AA986860	E030025M07|Sarg	expressed sequence AA986860	protein-coding
MACS_peak_11720	chr19	27978741	27979564	+	intron (NM_011265, intron 1 of 16)	intron (NM_011265, intron 1 of 16)	78286	NM_001166414	19726	Mm.313321	NM_011265	ENSMUSG00000040929	Rfx3	C230093O12Rik|MRFX3	regulatory factor X, 3 (influences HLA class II expression)	protein-coding
MACS_peak_11722	chr19	28209304	28209687	+	Intergenic	Intergenic	-123839	NM_011265	19726	Mm.313321	NM_011265	ENSMUSG00000040929	Rfx3	C230093O12Rik|MRFX3	regulatory factor X, 3 (influences HLA class II expression)	protein-coding
MACS_peak_11723	chr19	28256980	28257769	+	Intergenic	Intergenic	-171718	NM_011265	19726	Mm.313321	NM_011265	ENSMUSG00000040929	Rfx3	C230093O12Rik|MRFX3	regulatory factor X, 3 (influences HLA class II expression)	protein-coding
MACS_peak_11724	chr19	28634978	28635779	+	intron (NM_175459, intron 2 of 10)	intron (NM_175459, intron 2 of 10)	-117336	NR_045330	320176	Mm.406716	NR_045330	ENSMUSG00000097735	D930032P07Rik	-	RIKEN cDNA D930032P07 gene	ncRNA
MACS_peak_11725	chr19	28640960	28641549	+	intron (NM_175459, intron 2 of 10)	intron (NM_175459, intron 2 of 10)	-111460	NR_045330	320176	Mm.406716	NR_045330	ENSMUSG00000097735	D930032P07Rik	-	RIKEN cDNA D930032P07 gene	ncRNA
MACS_peak_11727	chr19	28847351	28847906	+	Intergenic	B2_Mm2|SINE|B2	-62028	NM_009199	20510	Mm.246670	NM_009199	ENSMUSG00000024935	Slc1a1	D130048G10Rik|EAAC1|EAAC2|EAAT3|MEAAC1	solute carrier family 1 (neuronal/epithelial high affinity glutamate transporter, system Xag), member 1	protein-coding
MACS_peak_11729	chr19	29082386	29083334	+	intron (NM_025950, intron 5 of 6)	intron (NM_025950, intron 5 of 6)	17876	NM_025950	67072	Mm.78875	NM_025950	ENSMUSG00000024780	Cdc37l1	2700033A15Rik|BB159850|Cdc37l|Harc	cell division cycle 37-like 1	protein-coding
MACS_peak_11730	chr19	29138317	29138908	+	Intergenic	Intergenic	-3179	NR_045687	100503337	Mm.103412	NR_045687		Gm9895	ENSMUSG00000052976	predicted gene 9895	ncRNA
MACS_peak_11736	chr19	29668176	29668728	+	intron (NM_001081319, intron 17 of 25)	RLTR13A|LTR|ERVK	54458	NM_001081213	226090	Mm.267131	NM_146098		Ermp1	D19Ertd410e|D19Wsu12e|Fxna|mKIAA1815	endoplasmic reticulum metallopeptidase 1	protein-coding
MACS_peak_11737	chr19	29905175	29905891	+	Intergenic	ORR1B2|LTR|MaLR	-18069	NM_177721	240614	Mm.125503	NM_177721	ENSMUSG00000074909	Ranbp6	C630001B19	RAN binding protein 6	protein-coding
MACS_peak_11739	chr19	29944988	29945569	+	Intergenic	RLTR13D1|LTR|ERVK	-54326	NM_133775	77125	Mm.182359	NM_133775	ENSMUSG00000024810	Il33	9230117N10Rik|Il-33|Il1f11|NF-HEV	interleukin 33	protein-coding
MACS_peak_1174	chr1	132722477	132722893	+	promoter-TSS (NM_011082)	promoter-TSS (NM_011082)	-576	NM_011082	18703	Mm.276414	NM_011082	ENSMUSG00000026417	Pigr	-	polymeric immunoglobulin receptor	protein-coding
MACS_peak_11740	chr19	30020019	30020481	+	promoter-TSS (NM_001164724)	promoter-TSS (NM_001164724)	-30	NM_001164724	77125	Mm.182359	NM_133775	ENSMUSG00000024810	Il33	9230117N10Rik|Il-33|Il1f11|NF-HEV	interleukin 33	protein-coding
MACS_peak_11741	chr19	30103293	30104021	+	Intergenic	Intergenic	-1346	NM_144873	109113	Mm.313364	NM_144873	ENSMUSG00000024817	Uhrf2	2310065A22Rik|AI426270|AW214556|D130071B19Rik|Nirf	ubiquitin-like, containing PHD and RING finger domains 2	protein-coding
MACS_peak_11742	chr19	30170718	30171193	+	Intergenic	Intergenic	65952	NM_144873	109113	Mm.313364	NM_144873	ENSMUSG00000024817	Uhrf2	2310065A22Rik|AI426270|AW214556|D130071B19Rik|Nirf	ubiquitin-like, containing PHD and RING finger domains 2	protein-coding
MACS_peak_11743	chr19	30190063	30190459	+	intron (NM_138595, intron 18 of 24)	intron (NM_138595, intron 18 of 24)	59670	NM_138595	104174	Mm.274852	NM_138595	ENSMUSG00000024827	Gldc	D030049L12Rik|D19Wsu57e	glycine decarboxylase	protein-coding
MACS_peak_11744	chr19	30259875	30260545	+	Intergenic	RLTR17|LTR|ERVK	-10279	NM_138595	104174	Mm.274852	NM_138595	ENSMUSG00000024827	Gldc	D030049L12Rik|D19Wsu57e	glycine decarboxylase	protein-coding
MACS_peak_11745	chr19	30579756	30580427	+	Intergenic	Intergenic	34078	NR_003650	546723	Mm.301509	NM_001037169		Ppp1r2-ps3	EG546723|Gm5972	protein phosphatase 1, regulatory (inhibitor) subunit 2, pseudogene 3	pseudo
MACS_peak_11746	chr19	30628136	30628842	+	Intergenic	Intergenic	-4503	NM_010051	13380	Mm.214717	NM_010051	ENSMUSG00000024868	Dkk1	mdkk-1	dickkopf homolog 1 (Xenopus laevis)	protein-coding
MACS_peak_1175	chr1	133009127	133009505	+	Intergenic	Intergenic	-15196	NM_008551	17164	Mm.221235	NM_008551	ENSMUSG00000016528	Mapkapk2	AA960234|MAPKAP-K2|MK-2|MK2|Rps6kc1	MAP kinase-activated protein kinase 2	protein-coding
MACS_peak_11750	chr19	31180445	31181020	+	intron (NM_001013833, intron 3 of 17)	intron (NM_001013833, intron 3 of 17)	23401	NM_031249	83410	Mm.22031	NM_031249	ENSMUSG00000053536	Cstf2t	64kDa|C77975|tCstF-64|tauCstF-64	cleavage stimulation factor, 3' pre-RNA subunit 2, tau	protein-coding
MACS_peak_11752	chr19	31996082	31996640	+	intron (NM_001081074, intron 6 of 11)	intron (NM_001081074, intron 6 of 11)	53110	NM_001081074	69865	Mm.87538	NM_001081074	ENSMUSG00000052595	A1cf	1810073H04Rik|ACF64|ACF65|ASP|Acf	APOBEC1 complementation factor	protein-coding
MACS_peak_11753	chr19	32247041	32247525	+	intron (NM_144792, intron 5 of 9)	intron (NM_144792, intron 5 of 9)	38220	NM_001168526	208449	Mm.329810	NM_144792	ENSMUSG00000040451	Sgms1	9530058O11Rik|AI841905|C80702|Mob|Sms1|Sor1|Tmem23	sphingomyelin synthase 1	protein-coding
MACS_peak_11754	chr19	32269124	32269975	+	intron (NM_144792, intron 5 of 9)	L1MA6|LINE|L1	15954	NM_001168526	208449	Mm.329810	NM_144792	ENSMUSG00000040451	Sgms1	9530058O11Rik|AI841905|C80702|Mob|Sms1|Sor1|Tmem23	sphingomyelin synthase 1	protein-coding
MACS_peak_11755	chr19	32305543	32306182	+	intron (NM_144792, intron 4 of 9)	intron (NM_144792, intron 4 of 9)	-20359	NM_001168526	208449	Mm.329810	NM_144792	ENSMUSG00000040451	Sgms1	9530058O11Rik|AI841905|C80702|Mob|Sms1|Sor1|Tmem23	sphingomyelin synthase 1	protein-coding
MACS_peak_11756	chr19	32314845	32315417	+	intron (NM_144792, intron 4 of 9)	intron (NM_144792, intron 4 of 9)	-29628	NM_001168526	208449	Mm.329810	NM_144792	ENSMUSG00000040451	Sgms1	9530058O11Rik|AI841905|C80702|Mob|Sms1|Sor1|Tmem23	sphingomyelin synthase 1	protein-coding
MACS_peak_11758	chr19	32345832	32346274	+	intron (NM_001168525, intron 2 of 9)	intron (NM_001168525, intron 2 of 9)	-60550	NM_001168526	208449	Mm.329810	NM_144792	ENSMUSG00000040451	Sgms1	9530058O11Rik|AI841905|C80702|Mob|Sms1|Sor1|Tmem23	sphingomyelin synthase 1	protein-coding
MACS_peak_11759	chr19	32382794	32383421	+	intron (NM_144792, intron 2 of 9)	RLTR11A|LTR|ERVK	40699	NM_001168525	208449	Mm.329810	NM_144792	ENSMUSG00000040451	Sgms1	9530058O11Rik|AI841905|C80702|Mob|Sms1|Sor1|Tmem23	sphingomyelin synthase 1	protein-coding
MACS_peak_11760	chr19	32500320	32500714	+	Intergenic	Intergenic	36811	NR_033198	67188	Mm.391160	NR_033198	ENSMUSG00000097787	2700046G09Rik	-	RIKEN cDNA 2700046G09 gene	ncRNA
MACS_peak_11761	chr19	32596023	32596351	+	Intergenic	B2_Mm2|SINE|B2	35928	NM_010799	17330	Mm.255116	NM_010799	ENSMUSG00000024896	Minpp1	AA408516	multiple inositol polyphosphate histidine phosphatase 1	protein-coding
MACS_peak_11762	chr19	32794893	32795159	+	Intergenic	B2_Mm2|SINE|B2	-8238	NM_026487	67979	Mm.27123	NM_026487	ENSMUSG00000013662	Atad1	4921525H23Rik|AW107648|Thorase	ATPase family, AAA domain containing 1	protein-coding
MACS_peak_11763	chr19	32798112	32798788	+	Intergenic	Intergenic	-11662	NM_026487	67979	Mm.27123	NM_026487	ENSMUSG00000013662	Atad1	4921525H23Rik|AW107648|Thorase	ATPase family, AAA domain containing 1	protein-coding
MACS_peak_11764	chr19	33030542	33031286	+	Intergenic	Intergenic	198847	NM_008960	19211	Mm.245395	NM_008960	ENSMUSG00000013663	Pten	2310035O07Rik|A130070J02Rik|AI463227|B430203M17Rik|MMAC1|TEP1	phosphatase and tensin homolog	protein-coding
MACS_peak_11765	chr19	33032799	33033259	+	Intergenic	Intergenic	200962	NM_008960	19211	Mm.245395	NM_008960	ENSMUSG00000013663	Pten	2310035O07Rik|A130070J02Rik|AI463227|B430203M17Rik|MMAC1|TEP1	phosphatase and tensin homolog	protein-coding
MACS_peak_11767	chr19	33318542	33319196	+	intron (NM_001167818, intron 4 of 6)	intron (NM_001167818, intron 4 of 6)	147916	NM_001167818	67795	Mm.204591	NM_001146342	ENSMUSG00000071573	Rnls	6530404N21Rik|AI452315|AW060440|C10orf59	renalase, FAD-dependent amine oxidase	protein-coding
MACS_peak_11768	chr19	33338999	33339569	+	intron (NM_001167818, intron 4 of 6)	RMER10A|LTR|ERVL	127501	NM_001167818	67795	Mm.204591	NM_001146342	ENSMUSG00000071573	Rnls	6530404N21Rik|AI452315|AW060440|C10orf59	renalase, FAD-dependent amine oxidase	protein-coding
MACS_peak_1177	chr1	133035660	133036399	+	Intergenic	Intergenic	-1218	NM_145508	226419	Mm.39299	NM_145508	ENSMUSG00000016526	Dyrk3	BC006704	dual-specificity tyrosine-(Y)-phosphorylation regulated kinase 3	protein-coding
MACS_peak_11773	chr19	33971847	33972604	+	Intergenic	MMETn-int|LTR|ERVK	-63513	NM_026334	67717	Mm.329816	NM_026334	ENSMUSG00000024768	Lipf	2310051B21Rik|AV082900	lipase, gastric	protein-coding
MACS_peak_11775	chr19	34747954	34748574	+	intron (NM_172838, intron 5 of 6)	intron (NM_172838, intron 5 of 6)	32885	NM_008331	15957	Mm.439751	NM_008331	ENSMUSG00000034459	Ifit1	ISG56|Ifi56|P56	interferon-induced protein with tetratricopeptide repeats 1	protein-coding
MACS_peak_11777	chr19	35033833	35034297	+	intron (NM_183046, intron 25 of 31)	intron (NM_183046, intron 25 of 31)	37217	NM_183046	240641	Mm.278471	NM_183046	ENSMUSG00000024795	Kif20b	33cex|B130024C23|C330014J10Rik|Mphosph1|magoo	kinesin family member 20B	protein-coding
MACS_peak_11779	chr19	35254396	35255138	+	Intergenic	Intergenic	257919	NM_183046	240641	Mm.278471	NM_183046	ENSMUSG00000024795	Kif20b	33cex|B130024C23|C330014J10Rik|Mphosph1|magoo	kinesin family member 20B	protein-coding
MACS_peak_1178	chr1	133046771	133047389	+	Intergenic	MT2_Mm|LTR|ERVL	-2704	NM_001136070	16865	Mm.276294	NM_010709	ENSMUSG00000026427	Eif2d	D1Ertd5e|Lgtn	eukaryotic translation initiation factor 2D	protein-coding
MACS_peak_11780	chr19	36189033	36189548	+	intron (NM_013468, intron 8 of 8)	intron (NM_013468, intron 8 of 8)	5044	NM_013468	107765	Mm.10279	NM_013468	ENSMUSG00000024803	Ankrd1	Alrp|CARP|Crap|MARP1	ankyrin repeat domain 1 (cardiac muscle)	protein-coding
MACS_peak_11783	chr19	37020705	37021304	+	intron (NM_001080706, intron 2 of 37)	B2_Mm2|SINE|B2	20435	NM_001080706	107182	Mm.295062	NM_001080706	ENSMUSG00000040565	Btaf1	AI414500|AI447930|E430027O22Rik|TAF170	BTAF1 RNA polymerase II, B-TFIID transcription factor-associated, (Mot1 homolog, S. cerevisiae)	protein-coding
MACS_peak_11784	chr19	37208145	37208511	+	intron (NM_001290829, intron 3 of 9)	intron (NM_001290829, intron 3 of 9)	-40005	NR_045329	319931	Mm.446730	NR_045329	ENSMUSG00000097591	A330032B11Rik	-	RIKEN cDNA A330032B11 gene	ncRNA
MACS_peak_11787	chr19	37466333	37466922	+	intron (NM_010615, intron 8 of 21)	B3|SINE|B2	15734	NM_010615	16551	Mm.42203	NM_010615	ENSMUSG00000012443	Kif11	Eg5|Kif8|Kifl1|Knsl1	kinesin family member 11	protein-coding
MACS_peak_11792	chr19	37840511	37841032	+	Intergenic	RLTR13D5|LTR|ERVK	68473	NM_007811	13082	Mm.42230	NM_007811	ENSMUSG00000024987	Cyp26a1	Cyp26|P450RA|P450RAI|RAH	cytochrome P450, family 26, subfamily a, polypeptide 1	protein-coding
MACS_peak_11794	chr19	37955853	37956470	+	Intergenic	Intergenic	161906	NM_001099634	226101	Mm.34674	NM_177035	ENSMUSG00000048612	Myof	2310004N10Rik|2310051D19Rik|E030042N20Rik|Fer1l3	myoferlin	protein-coding
MACS_peak_11797	chr19	38119345	38120275	+	Intergenic	Lx8|LINE|L1	-1743	NM_001099634	226101	Mm.34674	NM_177035	ENSMUSG00000048612	Myof	2310004N10Rik|2310051D19Rik|E030042N20Rik|Fer1l3	myoferlin	protein-coding
MACS_peak_11798	chr19	38130648	38131144	+	intron (NM_001164362, intron 1 of 9)	intron (NM_001164362, intron 1 of 9)	1364	NM_001164362	74107	Mm.9916	NM_028293	ENSMUSG00000024989	Cep55	1200008O12Rik|2700032M20Rik	centrosomal protein 55	protein-coding
MACS_peak_118	chr1	12015708	12016316	+	Intergenic	RLTR20B3|LTR|ERVK	-400055	NR_105759	102465961		NR_105759	miRBase:MI0021869	Mir6341	mmu-mir-6341	microRNA mir-6341	ncRNA
MACS_peak_11800	chr19	38138488	38139176	+	intron (NM_001164362, intron 5 of 9)	MER5A1|DNA|MER1_type	9300	NM_001164362	74107	Mm.9916	NM_028293	ENSMUSG00000024989	Cep55	1200008O12Rik|2700032M20Rik	centrosomal protein 55	protein-coding
MACS_peak_11803	chr19	38400327	38400858	+	Intergenic	Intergenic	61320	NM_020278	56839	Mm.298251	NM_020278	ENSMUSG00000067242	Lgi1	BB130740	leucine-rich repeat LGI family, member 1	protein-coding
MACS_peak_11804	chr19	38415536	38416442	+	Intergenic	RLTR13B1|LTR|ERVK	-54481	NM_175507	240660	Mm.262085	NM_175507	ENSMUSG00000044026	Slc35g1	AA590464|D330039I19Rik|Tmem20	solute carrier family 35, member G1	protein-coding
MACS_peak_11805	chr19	38422267	38423355	+	Intergenic	Intergenic	-47659	NM_175507	240660	Mm.262085	NM_175507	ENSMUSG00000044026	Slc35g1	AA590464|D330039I19Rik|Tmem20	solute carrier family 35, member G1	protein-coding
MACS_peak_11806	chr19	38423558	38424037	+	Intergenic	RMER5|LTR|ERV1	-46673	NM_175507	240660	Mm.262085	NM_175507	ENSMUSG00000044026	Slc35g1	AA590464|D330039I19Rik|Tmem20	solute carrier family 35, member G1	protein-coding
MACS_peak_1181	chr1	133433034	133433446	+	intron (NM_175382, intron 3 of 3)	intron (NM_175382, intron 3 of 3)	8674	NM_175382	108900	Mm.31278	NM_175382	ENSMUSG00000055184	Fam72a	2700049P18Rik|P17	family with sequence similarity 72, member A	protein-coding
MACS_peak_11810	chr19	38594699	38595184	+	Intergenic	L1MEc|LINE|L1	-3746	NM_019588	74055	Mm.34031	NM_019588	ENSMUSG00000024998	Plce1	4933403A21Rik|PLCepsilon|Plce|mKIAA1516	phospholipase C, epsilon 1	protein-coding
MACS_peak_11814	chr19	39003007	39003487	+	Intergenic	Intergenic	-2233	NM_008234	15201	Mm.57223	NM_008234		Hells	AI323785|E130115I21Rik|LSH|Lysh|PASG|YFK8	helicase, lymphoid specific	protein-coding
MACS_peak_11821	chr19	39890373	39891123	+	Intergenic	RLTR13D6|LTR|ERVK	-3444	NM_010004	13099	Mm.353875	NM_010004	ENSMUSG00000025004	Cyp2c40	AI265721|AI662255	cytochrome P450, family 2, subfamily c, polypeptide 40	protein-coding
MACS_peak_11823	chr19	39964268	39965080	+	Intergenic	RLTR13D6|LTR|ERVK	-3415	NM_001104525	100043108	Mm.482331	NM_001104525	ENSMUSG00000092008	Cyp2c69	AI098658	cytochrome P450, family 2, subfamily c, polypeptide 69	protein-coding
MACS_peak_1183	chr1	133509994	133510361	+	Intergenic	(GGCTG)n|Simple_repeat|Simple_repeat	14486	NM_011924	26361	Mm.89986	NM_011924	ENSMUSG00000026432	Avpr1b	AVPR3|V3/V1b|VIBR|VPR3	arginine vasopressin receptor 1B	protein-coding
MACS_peak_11831	chr19	40277026	40277936	+	Intergenic	RLTR13D2|LTR|ERVK	-15705	NM_145499	226105	Mm.29119	NM_145499	ENSMUSG00000060613	Cyp2c70	-	cytochrome P450, family 2, subfamily c, polypeptide 70	protein-coding
MACS_peak_11832	chr19	40347014	40347828	+	Intergenic	Intergenic	-1315	NM_016861	54132	Mm.5567	NM_016861		Pdlim1	Clim1|mClim1	PDZ and LIM domain 1 (elfin)	protein-coding
MACS_peak_11835	chr19	40528512	40528921	+	intron (NM_178362, intron 1 of 28)	intron (NM_178362, intron 1 of 28)	-2828	NM_001034963	20411	Mm.210815	NM_009166		Sorbs1	2310065E01Rik|9530001P15Rik|CAP|SH3P12|Sh3d5|mKIAA1296	sorbin and SH3 domain containing 1	protein-coding
MACS_peak_11837	chr19	40686724	40687181	+	promoter-TSS (NM_026260)	promoter-TSS (NM_026260)	-247	NM_026260	67590	Mm.60758	NM_026260	ENSMUSG00000025008	Tctn3	4930521E07Rik|AI197391|Tect3	tectonic family member 3	protein-coding
MACS_peak_11839	chr19	40811601	40812093	+	intron (NM_009848, intron 9 of 9)	intron (NM_009848, intron 9 of 9)	77563	NM_009848	12495	Mm.2824	NM_009848	ENSMUSG00000048120	Entpd1	2610206B08Rik|AA408691|Cd39|NTPDase-1	ectonucleoside triphosphate diphosphohydrolase 1	protein-coding
MACS_peak_11840	chr19	40947601	40948085	+	intron (NR_045343, intron 1 of 4)	CpG	5037	NR_045343	381223	Mm.136844	NR_045343		E030044B06Rik	E030007J07Rik|Gm1618	RIKEN cDNA E030044B06 gene	ncRNA
MACS_peak_11842	chr19	41033411	41033885	+	intron (NM_008528, intron 6 of 16)	intron (NM_008528, intron 6 of 16)	35377	NM_008528	17060	Mm.9749	NM_008528	ENSMUSG00000061132	Blnk	BASH|Bca|Ly-57|Ly57|Lyw-57|SLP-65	B cell linker	protein-coding
MACS_peak_11845	chr19	41340540	41341487	+	Intergenic	MTD|LTR|MaLR	-2519	NM_133352	107358	Mm.246440	NM_133352	ENSMUSG00000025016	Tm9sf3	1810073M23Rik|2810031D16Rik|AI115521|AI413748|AW146116|AW549777|Smbp|mKIAA4036	transmembrane 9 superfamily member 3	protein-coding
MACS_peak_11847	chr19	41529326	41529859	+	Intergenic	RMER19B|LTR|ERVK	-70032	NM_031376	83490	Mm.222266	NM_031376	ENSMUSG00000025017	Pik3ap1	1810044J04Rik|BCAP	phosphoinositide-3-kinase adaptor protein 1	protein-coding
MACS_peak_11849	chr19	41988877	41989349	+	intron (NM_023418, intron 1 of 3)	B2_Mm2|SINE|B2	2752	NM_023418	18648	Mm.391589	NM_023418	ENSMUSG00000011752	Pgam1	2310050F24Rik|Pgam-1	phosphoglycerate mutase 1	protein-coding
MACS_peak_11850	chr19	42057067	42057525	+	intron (NM_145500, intron 1 of 2)	intron (NM_145500, intron 1 of 2)	1043	NM_145500	226122	Mm.22948	NM_145500	ENSMUSG00000025171	Ubtd1	BC016129	ubiquitin domain containing 1	protein-coding
MACS_peak_11851	chr19	42119748	42120014	+	promoter-TSS (NM_026152)	promoter-TSS (NM_026152)	-460	NM_026152	67432	Mm.24196	NM_026152	ENSMUSG00000025176	Hoga1	0610010D20Rik|Dhdpsl|Npl2	4-hydroxy-2-oxoglutarate aldolase 1	protein-coding
MACS_peak_11852	chr19	42203843	42204993	+	promoter-TSS (NM_027106)	promoter-TSS (NM_027106)	-935	NM_027106	69534	Mm.30060	NM_027106	ENSMUSG00000018821	Avpi1	2310008N12Rik|AA410041|VIT32|esu|mVIT32	arginine vasopressin-induced 1	protein-coding
MACS_peak_11854	chr19	42211637	42212112	+	Intergenic	L1MC1|LINE|L1	-8391	NM_027106	69534	Mm.30060	NM_027106	ENSMUSG00000018821	Avpi1	2310008N12Rik|AA410041|VIT32|esu|mVIT32	arginine vasopressin-induced 1	protein-coding
MACS_peak_11859	chr19	42459230	42459907	+	intron (NM_145123, intron 2 of 14)	intron (NM_145123, intron 2 of 14)	46705	NM_145123	72832	Mm.313558	NM_145123	ENSMUSG00000042401	Crtac1	2810454P21Rik|AW047536|Crtac1B|Lotus	cartilage acidic protein 1	protein-coding
MACS_peak_1186	chr1	133782373	133782904	+	Intergenic	Intergenic	18784	NM_144875	226422	Mm.34027	NM_144875	ENSMUSG00000026433	Rab29	Rab7l1	RAB29, member RAS oncogene family	protein-coding
MACS_peak_11864	chr19	43878196	43878794	+	intron (NM_013806, intron 8 of 31)	intron (NM_013806, intron 8 of 31)	21697	NM_013806	12780	Mm.39054	NM_013806	ENSMUSG00000025194	Abcc2	AI173996|Abc30|Cmoat|Mrp2|cMRP	ATP-binding cassette, sub-family C (CFTR/MRP), member 2	protein-coding
MACS_peak_11865	chr19	43954038	43954596	+	intron (NM_028029, intron 4 of 15)	CpG	41024	NR_033472	100038628	Mm.212585	NR_033472	ENSMUSG00000074828	Gm10768	ENSMUSG00000074828	predicted gene 10768	ncRNA
MACS_peak_11866	chr19	44123589	44124233	+	intron (NM_001164359, intron 7 of 11)	intron (NM_001164359, intron 7 of 11)	-20174	NM_001167905	226143	Mm.329866	NM_001001446	ENSMUSG00000025197	Cyp2c44	AW107714|BC034834|b2b386Clo	cytochrome P450, family 2, subfamily c, polypeptide 44	protein-coding
MACS_peak_11868	chr19	44321391	44321931	+	Intergenic	Intergenic	43883	NM_024450	30049	Mm.480594	NM_024450	ENSMUSG00000025202	Scd3	4930513N16Rik	stearoyl-coenzyme A desaturase 3	protein-coding
MACS_peak_11869	chr19	44328268	44329309	+	Intergenic	RLTR1B|LTR|ERV1	-39378	NM_009128	20250	Mm.487021	NM_009128	ENSMUSG00000025203	Scd2	Scd-2|swty	stearoyl-Coenzyme A desaturase 2	protein-coding
MACS_peak_1187	chr1	133786630	133787533	+	Intergenic	B4|SINE|B4	-19954	NM_175294	98415	Mm.246869	NM_175294	ENSMUSG00000026434	Nucks1	2700010L10Rik|8430423A01Rik|AI647518|C78391|Nucks	nuclear casein kinase and cyclin-dependent kinase substrate 1	protein-coding
MACS_peak_11870	chr19	44336121	44336803	+	Intergenic	PB1D9|SINE|Alu	-31704	NM_009128	20250	Mm.487021	NM_009128	ENSMUSG00000025203	Scd2	Scd-2|swty	stearoyl-Coenzyme A desaturase 2	protein-coding
MACS_peak_11873	chr19	44368777	44369608	+	intron (NM_009128, intron 1 of 5)	intron (NM_009128, intron 1 of 5)	1026	NM_009128	20250	Mm.487021	NM_009128	ENSMUSG00000025203	Scd2	Scd-2|swty	stearoyl-Coenzyme A desaturase 2	protein-coding
MACS_peak_11876	chr19	44629687	44630237	+	promoter-TSS (NM_026061)	promoter-TSS (NM_026061)	-57	NM_026061	67264	Mm.2060	NM_026061	ENSMUSG00000025204	Ndufb8	2900010I05Rik|AI987932	NADH dehydrogenase (ubiquinone) 1 beta subcomplex 8	protein-coding
MACS_peak_11880	chr19	45004688	45005303	+	promoter-TSS (NM_001081225)	promoter-TSS (NM_001081225)	-614	NM_001081225	226151	Mm.212609	NM_172638	ENSMUSG00000036097	Fam178a	3632432H19|6030443O07Rik|AU014917	family with sequence similarity 178, member A	protein-coding
MACS_peak_11881	chr19	45148549	45148962	+	Intergenic	Intergenic	-1874	NM_178929	107250	Mm.24417	NM_178929	ENSMUSG00000025213	Kazald1	AI842353|Bono1|IGFBP-rP10	Kazal-type serine peptidase inhibitor domain 1	protein-coding
MACS_peak_11882	chr19	45155716	45156134	+	Intergenic	Intergenic	5296	NM_178929	107250	Mm.24417	NM_178929	ENSMUSG00000025213	Kazald1	AI842353|Bono1|IGFBP-rP10	Kazal-type serine peptidase inhibitor domain 1	protein-coding
MACS_peak_11887	chr19	45363291	45363911	+	Intergenic	Intergenic	-53875	NM_010691	16814	Mm.116815	NM_010691		Lbx1	Lbx1h	ladybird homeobox homolog 1 (Drosophila)	protein-coding
MACS_peak_11889	chr19	45391940	45392362	+	Intergenic	Intergenic	-46073	NM_001286466	12234	Mm.119717	NM_009771	ENSMUSG00000025217	Btrc	Beta-Trcp1|E3RS-IkappaB|E3RSIkappaB|FWD1|Fbw1a|HOS|Slimb|b-TrCP|beta-TrCP	beta-transducin repeat containing protein	protein-coding
MACS_peak_11890	chr19	45431311	45431876	+	Intergenic	PB1D7|SINE|Alu	-6631	NM_001286466	12234	Mm.119717	NM_009771	ENSMUSG00000025217	Btrc	Beta-Trcp1|E3RS-IkappaB|E3RSIkappaB|FWD1|Fbw1a|HOS|Slimb|b-TrCP|beta-TrCP	beta-transducin repeat containing protein	protein-coding
MACS_peak_11891	chr19	45434820	45435422	+	Intergenic	B1_Mus2|SINE|Alu	-3103	NM_001286466	12234	Mm.119717	NM_009771	ENSMUSG00000025217	Btrc	Beta-Trcp1|E3RS-IkappaB|E3RSIkappaB|FWD1|Fbw1a|HOS|Slimb|b-TrCP|beta-TrCP	beta-transducin repeat containing protein	protein-coding
MACS_peak_11897	chr19	46068061	46068810	+	intron (NM_198296, intron 1 of 25)	RLTR13D6|LTR|ERVK	4543	NM_198296	71617	Mm.210949	NM_198296	ENSMUSG00000039901	9130011E15Rik	AI431055|AW050122	RIKEN cDNA 9130011E15 gene	protein-coding
MACS_peak_11898	chr19	46089046	46089510	+	Intergenic	Intergenic	11310	NM_176785	20170	Mm.101110	NM_176785	ENSMUSG00000074811	Hps6	5330434M19Rik|BLOC2|ru	Hermansky-Pudlak syndrome 6	protein-coding
MACS_peak_11899	chr19	46103241	46103756	+	Intergenic	B2_Mm1a|SINE|B2	10613	NM_010697	16825	Mm.327442	NM_010697	ENSMUSG00000025223	Ldb1	CLIM2|NLI	LIM domain binding 1	protein-coding
MACS_peak_119	chr1	12581858	12582677	+	Intergenic	ETnERV2-int|LTR|ERVK	-75377	NR_045297	329096	Mm.417782	NR_045297	ENSMUSG00000097171	Gm17644	4932411L15	predicted gene, 17644	ncRNA
MACS_peak_11900	chr19	46111019	46111607	+	intron (NM_001113408, intron 1 of 10)	intron (NM_001113408, intron 1 of 10)	2798	NM_010697	16825	Mm.327442	NM_010697	ENSMUSG00000025223	Ldb1	CLIM2|NLI	LIM domain binding 1	protein-coding
MACS_peak_11905	chr19	46318948	46319761	+	intron (NM_178930, intron 3 of 39)	intron (NM_178930, intron 3 of 39)	-59873	NM_001177369	18034	Mm.102365	NM_019408	ENSMUSG00000025225	Nfkb2	NF-kappaB2|lyt|p49|p49/p100|p50B|p52	nuclear factor of kappa light polypeptide gene enhancer in B cells 2, p49/p100	protein-coding
MACS_peak_11907	chr19	46568090	46568504	+	Intergenic	B1_Mm|SINE|Alu	-7841	NM_053100	93679	Mm.392177	NM_053100	ENSMUSG00000025034	Trim8	AA408830|BB006755|GERP|Rnf27	tripartite motif-containing 8	protein-coding
MACS_peak_11909	chr19	46599144	46599635	+	Intergenic	Intergenic	23251	NM_053100	93679	Mm.392177	NM_053100	ENSMUSG00000025034	Trim8	AA408830|BB006755|GERP|Rnf27	tripartite motif-containing 8	protein-coding
MACS_peak_1191	chr1	133896951	133897528	+	Intergenic	B2_Mm2|SINE|B2	-6943	NM_007923	13714	Mm.254233	NM_007923	ENSMUSG00000026436	Elk4	2310011G17Rik|A130026I01Rik|BB162516|SAP-1|Sap1	ELK4, member of ETS oncogene family	protein-coding
MACS_peak_11910	chr19	46673096	46673525	+	promoter-TSS (NM_146099)	promoter-TSS (NM_146099)	-286	NM_001177812	226178	Mm.329895	NM_146099	ENSMUSG00000047731	Wbp1l	D19Wsu162e|Opal1	WW domain binding protein 1 like	protein-coding
MACS_peak_11911	chr19	46839120	46839585	+	intron (NM_001102471, intron 1 of 6)	intron (NM_001102471, intron 1 of 6)	3253	NM_001102471	94219	Mm.306903	NM_033569	ENSMUSG00000064105	Cnnm2	AU015877|AW048635|Acdp2|Clp2	cyclin M2	protein-coding
MACS_peak_11912	chr19	46910460	46911153	+	intron (NM_001102471, intron 1 of 6)	Lx9|LINE|L1	74707	NM_001102471	94219	Mm.306903	NM_033569	ENSMUSG00000064105	Cnnm2	AU015877|AW048635|Acdp2|Clp2	cyclin M2	protein-coding
MACS_peak_11915	chr19	47121745	47122416	+	intron (NM_027654, intron 5 of 9)	MTE2a|LTR|MaLR	3255	NM_027654	71041	Mm.35413	NM_027654	ENSMUSG00000025050	Pcgf6	4933407A11Rik|AI604840|MBLR|Rnf134	polycomb group ring finger 6	protein-coding
MACS_peak_11916	chr19	47249967	47250364	+	Intergenic	Intergenic	-3145	NM_021360	18011	Mm.313651	NM_021360	ENSMUSG00000006435	Neurl1a	2410129E16Rik|AI450910|AI481072|Neu1|Neur1|Neurl|Neurl1|Nlz|Rnf67	neuralized homolog 1A (Drosophila)	protein-coding
MACS_peak_11919	chr19	47525038	47525775	+	intron (NM_001164717, intron 1 of 13)	intron (NM_001164717, intron 1 of 13)	13495	NM_001164717	14218	Mm.127560	NM_008018	ENSMUSG00000053617	Sh3pxd2a	2310014D11Rik|AA589508|AI256723|AI413738|C230050L11|EG329070|Fish|Gm5098|Sh3md1|TSK5|Tks5	SH3 and PX domains 2A	protein-coding
MACS_peak_11921	chr19	47576978	47577572	+	intron (NM_175360, intron 9 of 9)	intron (NM_175360, intron 9 of 9)	-10197	NR_045322	100503104	Mm.442735	NR_045322	ENSMUSG00000097990	Gm19557	-	predicted gene, 19557	ncRNA
MACS_peak_11923	chr19	47779921	47780459	+	Intergenic	Intergenic	-13658	NM_001290825	12821	Mm.1225	NM_007732	ENSMUSG00000025064	Col17a1	BP180|Bpag|Bpag2	collagen, type XVII, alpha 1	protein-coding
MACS_peak_11928	chr19	48200186	48200673	+	Intergenic	Intergenic	-80086	NM_025696	66673	Mm.70980	NM_025696	ENSMUSG00000063434	Sorcs3	6330404A12Rik|AW045579	sortilin-related VPS10 domain containing receptor 3	protein-coding
MACS_peak_11930	chr19	48724358	48724935	+	intron (NM_025696, intron 6 of 26)	intron (NM_025696, intron 6 of 26)	444131	NM_025696	66673	Mm.70980	NM_025696	ENSMUSG00000063434	Sorcs3	6330404A12Rik|AW045579	sortilin-related VPS10 domain containing receptor 3	protein-coding
MACS_peak_11932	chr19	49316983	49317686	+	Intergenic	MER5A|DNA|MER1_type	1036819	NM_025696	66673	Mm.70980	NM_025696	ENSMUSG00000063434	Sorcs3	6330404A12Rik|AW045579	sortilin-related VPS10 domain containing receptor 3	protein-coding
MACS_peak_11934	chr19	49750410	49750964	+	Intergenic	Intergenic	1002449	NM_001252501	58178	Mm.313672	NM_021377	ENSMUSG00000043531	Sorcs1	Sorcs|mSorCS	VPS10 domain receptor protein SORCS 1	protein-coding
MACS_peak_11940	chr19	50514088	50514632	+	intron (NM_001290356, intron 2 of 24)	intron (NM_001290356, intron 2 of 24)	238776	NM_001252501	58178	Mm.313672	NM_021377	ENSMUSG00000043531	Sorcs1	Sorcs|mSorCS	VPS10 domain receptor protein SORCS 1	protein-coding
MACS_peak_11942	chr19	50718208	50718842	+	intron (NM_001290356, intron 1 of 24)	intron (NM_001290356, intron 1 of 24)	34611	NM_001252501	58178	Mm.313672	NM_021377	ENSMUSG00000043531	Sorcs1	Sorcs|mSorCS	VPS10 domain receptor protein SORCS 1	protein-coding
MACS_peak_11944	chr19	53067558	53067963	+	intron (NM_133216, intron 20 of 20)	intron (NM_133216, intron 20 of 20)	17486	NR_105834	102465220		NR_105834		Mir6407	mmu-mir-6407	microRNA mir-6407	ncRNA
MACS_peak_11945	chr19	53132772	53133402	+	Intergenic	Intergenic	-17655	NR_045320	78457	Mm.76932	NR_045320		1700054A03Rik	-	RIKEN cDNA 1700054A03 gene	ncRNA
MACS_peak_11946	chr19	53138734	53139394	+	Intergenic	Intergenic	-11678	NR_045320	78457	Mm.76932	NR_045320		1700054A03Rik	-	RIKEN cDNA 1700054A03 gene	ncRNA
MACS_peak_11952	chr19	53494072	53494589	+	Intergenic	Intergenic	-29267	NM_172429	76479	Mm.313687	NM_172429	ENSMUSG00000025024	Smndc1	2410004J23Rik|4933440I19Rik	survival motor neuron domain containing 1	protein-coding
MACS_peak_11954	chr19	53534565	53535919	+	intron (NR_028427, intron 2 of 9)	intron (NR_028427, intron 2 of 9)	4044	NR_028427	381232	Mm.248624	NR_028427	ENSMUSG00000097636	5830416P10Rik	4833407H14Rik|5430437C04Rik|ENSMUSG00000074788|Gm10758	RIKEN cDNA 5830416P10 gene	ncRNA
MACS_peak_11959	chr19	53793238	53793658	+	intron (NM_001170847, intron 1 of 13)	intron (NM_001170847, intron 1 of 13)	41652	NM_001170847	73713	Mm.313695	NM_001170847	ENSMUSG00000043639	Rbm20	1110018J23Rik|2010003H22Rik|AI646761	RNA binding motif protein 20	protein-coding
MACS_peak_11961	chr19	54068515	54069006	+	intron (NM_001168505, intron 2 of 8)	B2_Mm2|SINE|B2	49394	NM_019658	56392	Mm.228669	NM_019658	ENSMUSG00000024976	Shoc2	AU017287|Sur8|mKIAA0862	soc-2 (suppressor of clear) homolog (C. elegans)	protein-coding
MACS_peak_11962	chr19	54091968	54092507	+	intron (NM_001168505, intron 4 of 8)	intron (NM_001168505, intron 4 of 8)	-27435	NM_007417	11551	Mm.235195	NM_007417	ENSMUSG00000033717	Adra2a	AW122659|Adra-2|Adra-2a|alpha(2A)AR|alpha2-C10|alpha2A|alpha2A-AR	adrenergic receptor, alpha 2a	protein-coding
MACS_peak_11964	chr19	54130159	54130940	+	Intergenic	Intergenic	10877	NM_007417	11551	Mm.235195	NM_007417	ENSMUSG00000033717	Adra2a	AW122659|Adra-2|Adra-2a|alpha(2A)AR|alpha2-C10|alpha2A|alpha2A-AR	adrenergic receptor, alpha 2a	protein-coding
MACS_peak_11967	chr19	54679624	54680397	+	Intergenic	RLTR25B|LTR|ERVK	493927	NM_008149	14732	Mm.210196	NM_008149	ENSMUSG00000024978	Gpam	GPAT|GPAT1	glycerol-3-phosphate acyltransferase, mitochondrial	protein-coding
MACS_peak_11968	chr19	54861529	54862182	+	Intergenic	Lx9|LINE|L1	312082	NM_008149	14732	Mm.210196	NM_008149	ENSMUSG00000024978	Gpam	GPAT|GPAT1	glycerol-3-phosphate acyltransferase, mitochondrial	protein-coding
MACS_peak_1197	chr1	134367355	134368617	+	Intergenic	(TAAA)n|Simple_repeat|Simple_repeat	-5958	NM_172517	213464	Mm.132868	NM_172517	ENSMUSG00000026439	Rbbp5	4933411J24Rik|C330016J05	retinoblastoma binding protein 5	protein-coding
MACS_peak_11972	chr19	55292755	55293301	+	intron (NM_001081076, intron 12 of 20)	intron (NM_001081076, intron 12 of 20)	22698	NM_001081076	73707	Mm.489987	NM_001081076	ENSMUSG00000055523	Gucy2g	2410077I05Rik|GC-G	guanylate cyclase 2g	protein-coding
MACS_peak_11973	chr19	55299613	55300327	+	intron (NM_001081076, intron 9 of 20)	intron (NM_001081076, intron 9 of 20)	15756	NM_001081076	73707	Mm.489987	NM_001081076	ENSMUSG00000055523	Gucy2g	2410077I05Rik|GC-G	guanylate cyclase 2g	protein-coding
MACS_peak_11976	chr19	55566078	55566711	+	intron (NM_016862, intron 5 of 7)	intron (NM_016862, intron 5 of 7)	175847	NM_001293686	53611	Mm.258637	NM_016862	ENSMUSG00000024983	Vti1a	1110014F16Rik|1110018K19Rik|4921537J05Rik|MVti1|MVti1a|Vti1|Vti1-rp2	vesicle transport through interaction with t-SNAREs 1A	protein-coding
MACS_peak_11977	chr19	55617029	55618339	+	intron (NM_001293686, intron 7 of 7)	intron (NM_001293686, intron 7 of 7)	159010	NR_045318	77594	Mm.329924	NR_045318	ENSMUSG00000097632	4930552P12Rik	-	RIKEN cDNA 4930552P12 gene	ncRNA
MACS_peak_11979	chr19	55640716	55641179	+	intron (NM_001293686, intron 7 of 7)	intron (NM_001293686, intron 7 of 7)	135747	NR_045318	77594	Mm.329924	NR_045318	ENSMUSG00000097632	4930552P12Rik	-	RIKEN cDNA 4930552P12 gene	ncRNA
MACS_peak_1198	chr1	134373222	134373951	+	promoter-TSS (NM_172517)	promoter-TSS (NM_172517)	-358	NM_172517	213464	Mm.132868	NM_172517	ENSMUSG00000026439	Rbbp5	4933411J24Rik|C330016J05	retinoblastoma binding protein 5	protein-coding
MACS_peak_11981	chr19	55970362	55970985	+	intron (NM_001142924, intron 1 of 11)	intron (NM_001142924, intron 1 of 11)	862	NM_001142924	21416	Mm.139815	NM_009333	ENSMUSG00000024985	Tcf7l2	TCF4B|TCF4E|Tcf-4|Tcf4|mTcf-4B|mTcf-4E	transcription factor 7 like 2, T cell specific, HMG box	protein-coding
MACS_peak_11983	chr19	56241637	56242046	+	Intergenic	RLTR17|LTR|ERVK	-120587	NM_146101	226243	Mm.25791	NM_146101	ENSMUSG00000025075	Habp2	AI035669|FSAP|HABP|HGFAL|PHBP	hyaluronic acid binding protein 2	protein-coding
MACS_peak_11984	chr19	56305915	56306551	+	Intergenic	LTR16E1|LTR|ERVL	-56195	NM_146101	226243	Mm.25791	NM_146101	ENSMUSG00000025075	Habp2	AI035669|FSAP|HABP|HGFAL|PHBP	hyaluronic acid binding protein 2	protein-coding
MACS_peak_1199	chr1	134420527	134420989	+	intron (NM_177129, intron 10 of 22)	B3|SINE|B2	17951	NM_029025	74626	Mm.34611	NM_029025	ENSMUSG00000048174	Tmem81	4930429O20Rik|AI465369	transmembrane protein 81	protein-coding
MACS_peak_11992	chr19	57428253	57428800	+	intron (NR_040316, intron 1 of 2)	L1M2|LINE|L1	6863	NR_040316	320879	Mm.375089	NR_040316	ENSMUSG00000097785	B230217O12Rik	-	RIKEN cDNA B230217O12 gene	ncRNA
MACS_peak_11993	chr19	57440326	57440873	+	intron (NM_145505, intron 1 of 16)	intron (NM_145505, intron 1 of 16)	5100	NM_145505	226252	Mm.358870	NM_145505	ENSMUSG00000033478	Fam160b1	AI450540|mKIAA1600	family with sequence similarity 160, member B1	protein-coding
MACS_peak_11994	chr19	57440910	57441609	+	intron (NM_145505, intron 1 of 16)	intron (NM_145505, intron 1 of 16)	5760	NM_145505	226252	Mm.358870	NM_145505	ENSMUSG00000033478	Fam160b1	AI450540|mKIAA1600	family with sequence similarity 160, member B1	protein-coding
MACS_peak_11996	chr19	57529644	57530347	+	intron (NM_029839, intron 1 of 6)	intron (NM_029839, intron 1 of 6)	2599	NM_028115	72133	Mm.258404	NM_028115	ENSMUSG00000025086	Trub1	2610009I02Rik|9030425C13Rik|AI448235|BB118943|C76870	TruB pseudouridine (psi) synthase homolog 1 (E. coli)	protein-coding
MACS_peak_11997	chr19	57651287	57651896	+	Intergenic	Intergenic	-33933	NM_181415	226255	Mm.245340	NM_181415	ENSMUSG00000054843	Atrnl1	AI504415|AW555641|Alp|Atrnl|Atrnlp	attractin like 1	protein-coding
MACS_peak_11998	chr19	57742349	57742776	+	intron (NM_181415, intron 9 of 28)	RLTR20B1|LTR|ERVK	57038	NM_181415	226255	Mm.245340	NM_181415	ENSMUSG00000054843	Atrnl1	AI504415|AW555641|Alp|Atrnl|Atrnlp	attractin like 1	protein-coding
MACS_peak_11999	chr19	58138686	58139443	+	intron (NM_181415, intron 28 of 28)	intron (NM_181415, intron 28 of 28)	13407	NR_049196	100885835		NR_049196		Mir5623	mmu-mir-5623	microRNA mir-5623	ncRNA
MACS_peak_12000	chr19	58268461	58269048	+	Intergenic	Intergenic	-101940	NR_040449	791347	Mm.452208	NR_040449		Gm10007	ENSMUSG00000056739	predicted gene 10007	ncRNA
MACS_peak_12005	chr19	58780688	58781116	+	Intergenic	RLTR13D1|LTR|ERVK	7495	NR_038140	69166	Mm.491059	NR_038140		1810018F18Rik	1810031L05Rik|1810047O18Rik	RIKEN cDNA 1810018F18 gene	ncRNA
MACS_peak_12006	chr19	59027783	59028195	+	intron (NM_178689, intron 4 of 13)	intron (NM_178689, intron 4 of 13)	10074	NM_178689	226265	Mm.103154	NM_178689	ENSMUSG00000048029	Eno4	6430537H07Rik	enolase 4	protein-coding
MACS_peak_12007	chr19	59913828	59914507	+	Intergenic	Intergenic	105100	NM_001033172	74998	Mm.24167	NM_001033172	ENSMUSG00000040022	Rab11fip2	4930470G04Rik|A830046J09Rik|AW558126|Nrip11	RAB11 family interacting protein 2 (class I)	protein-coding
MACS_peak_12009	chr19	60149187	60149846	+	Intergenic	Intergenic	-71062	NR_026942	107376	Mm.245813	NR_026942	ENSMUSG00000053117	E330013P04Rik	9930018I18Rik|AW492152	RIKEN cDNA E330013P04 gene	ncRNA
MACS_peak_12012	chr19	60806106	60806556	+	Intergenic	Intergenic	-25559	NM_178421	332397	Mm.186390	NM_178421	ENSMUSG00000072437	Nanos1	-	nanos homolog 1 (Drosophila)	protein-coding
MACS_peak_12013	chr19	61206809	61207443	+	Intergenic	RLTR46|LTR|ERVK	45086	NM_001177513	633057	Mm.426097	NM_001177513	ENSMUSG00000094649	Gm7102	EG633057	predicted gene 7102	protein-coding
MACS_peak_12016	chr1_random	347975	348365	+	Intergenic	Intergenic	-5257	NM_177389	338366	Mm.41152	NM_177389		Mia3	9130229H14Rik|A930039G15Rik|AU022327|B230399H06Rik|C80126|Gm1525|TANGO1|Tango	melanoma inhibitory activity 3	protein-coding
MACS_peak_12030	chr2	3337311	3337995	+	intron (NM_008579, intron 1 of 2)	intron (NM_008579, intron 1 of 2)	2267	NM_008579	104362	Mm.2688	NM_008579	ENSMUSG00000026650	Meig1	MLZ-278|Meg1	meiosis expressed gene 1	protein-coding
MACS_peak_12036	chr2	4034203	4034978	+	Intergenic	Intergenic	27597	NR_040500	73489	Mm.488103	NR_040500	ENSMUSG00000084859	1700080N15Rik	4933408D14Rik	RIKEN cDNA 1700080N15 gene	ncRNA
MACS_peak_12040	chr2	4496113	4496588	+	intron (NM_001177844, intron 3 of 11)	intron (NM_001177844, intron 3 of 11)	15550	NM_001177844	209630	Mm.37932	NM_172475	ENSMUSG00000026657	Frmd4a	2700017I06Rik|5330420J21|AI594879|C230040M21Rik|Frmd4|Gm13190|OTTMUSG00000010806|mKIAA1294	FERM domain containing 4A	protein-coding
MACS_peak_12041	chr2	4572925	4573535	+	promoter-TSS (NM_026045)	promoter-TSS (NM_026045)	-98	NM_026045	67229	Mm.38529	NM_026045	ENSMUSG00000039449	Prpf18	2810441A10Rik	PRP18 pre-mRNA processing factor 18 homolog (yeast)	protein-coding
MACS_peak_12045	chr2	4875317	4875952	+	Intergenic	BGLII|LTR|ERVK	-21534	NM_001113558	68527	Mm.27791	NM_026754	ENSMUSG00000026668	Ucma	1110017I16Rik|AW121955|Grp	upper zone of growth plate and cartilage matrix associated	protein-coding
MACS_peak_12048	chr2	4998946	4999672	+	Intergenic	ORR1C1-int|LTR|MaLR	-14325	NM_181848	71648	Mm.116942	NM_181848	ENSMUSG00000026672	Optn	4930441O07Rik|FIP2|HYPL|NRP	optineurin	protein-coding
MACS_peak_12050	chr2	5140865	5141574	+	intron (NM_028804, intron 2 of 2)	intron (NM_028804, intron 2 of 2)	82397	NM_028804	74186	Mm.274715	NM_028804	ENSMUSG00000026676	Ccdc3	2310045O21Rik	coiled-coil domain containing 3	protein-coding
MACS_peak_12053	chr2	5505397	5506087	+	intron (NM_177343, intron 1 of 10)	intron (NM_177343, intron 1 of 10)	91350	NM_001290376	227541	Mm.191949	NM_177343	ENSMUSG00000039145	Camk1d	A630059D12Rik|CKLiK|CaMKIdelta|E030025C11Rik|mCKLiK	calcium/calmodulin-dependent protein kinase ID	protein-coding
MACS_peak_12057	chr2	5923707	5924112	+	intron (NM_001081132, intron 8 of 21)	MER117|DNA|MER1_type	51394	NM_001081132	326622	Mm.31102	NM_001081132	ENSMUSG00000043241	Upf2	-	UPF2 regulator of nonsense transcripts homolog (yeast)	protein-coding
MACS_peak_12062	chr2	6091974	6092460	+	Intergenic	RLTR1B|LTR|ERV1	-22080	NR_040333	320132	Mm.445891	NR_040333	ENSMUSG00000087125	A230108P19Rik	-	RIKEN cDNA A230108P19 gene	ncRNA
MACS_peak_12065	chr2	6468414	6468778	+	intron (NM_001160292, intron 12 of 13)	intron (NM_001160292, intron 12 of 13)	194814	NM_181399	98910	Mm.40673	NM_181399	ENSMUSG00000039046	Usp6nl	AI316785|RNTRE|TRE2NL|mKIAA0019	USP6 N-terminal like	protein-coding
MACS_peak_12069	chr2	7870680	7871051	+	Intergenic	Intergenic	-553040	NM_001110231	14007	Mm.398543	NM_010160	ENSMUSG00000002107	Celf2	B230218O03|B230345P09Rik|C88023|CELF-2|CUG-BP2|Cugbp2|D230046B21Rik|Etr-3|Napor|Napor-2|mETR-3	CUGBP, Elav-like family member 2	protein-coding
MACS_peak_1207	chr1	134816194	134816606	+	intron (NM_010732, intron 1 of 1)	intron (NM_010732, intron 1 of 1)	39468	NM_010732	16980	Mm.39640	NM_010732	ENSMUSG00000026443	Lrrn2	5730406J09Rik|NLRR-2	leucine rich repeat protein 2, neuronal	protein-coding
MACS_peak_12081	chr2	10239848	10240537	+	Intergenic	B4|SINE|B4	-51886	NM_001198808	353282	Mm.329991	NM_177386	ENSMUSG00000061186	Sfmbt2	D2Wsu23e|D330030P06Rik	Scm-like with four mbt domains 2	protein-coding
MACS_peak_12082	chr2	10256678	10257199	+	Intergenic	L1MEf|LINE|L1	-35140	NM_001198808	353282	Mm.329991	NM_177386	ENSMUSG00000061186	Sfmbt2	D2Wsu23e|D330030P06Rik	Scm-like with four mbt domains 2	protein-coding
MACS_peak_12083	chr2	10312263	10313001	+	intron (NM_177386, intron 3 of 22)	intron (NM_177386, intron 3 of 22)	18569	NM_177386	353282	Mm.329991	NM_177386	ENSMUSG00000061186	Sfmbt2	D2Wsu23e|D330030P06Rik	Scm-like with four mbt domains 2	protein-coding
MACS_peak_12085	chr2	10589482	10589970	+	Intergenic	RLTR9D|LTR|ERVK	149944	NR_035418	100316831		NR_035418		Mir669h	Mirn669h|mmu-mir-669h	microRNA 669h	ncRNA
MACS_peak_12086	chr2	10942172	10942589	+	Intergenic	Lx7|LINE|L1	-151629	NM_008859	18761	Mm.329993	NM_008859	ENSMUSG00000026778	Prkcq	A130035A12Rik|AW494342|PKC-0|PKC-theta|PKCtheta|Pkcq	protein kinase C, theta	protein-coding
MACS_peak_12088	chr2	11093360	11093879	+	promoter-TSS (NM_008859)	promoter-TSS (NM_008859)	-390	NM_008859	18761	Mm.329993	NM_008859	ENSMUSG00000026778	Prkcq	A130035A12Rik|AW494342|PKC-0|PKC-theta|PKCtheta|Pkcq	protein kinase C, theta	protein-coding
MACS_peak_1209	chr1	134909055	134909617	+	intron (NM_008575, intron 3 of 11)	ID_B1|SINE|B4	12589	NM_008575	17248	Mm.426531	NM_008575	ENSMUSG00000054387	Mdm4	4933417N07Rik|AA414968|AL023055|AU018793|AU021806|C85810|Mdmx	transformed mouse 3T3 cell double minute 4	protein-coding
MACS_peak_12091	chr2	11535427	11535746	+	Intergenic	ETnERV2-int|LTR|ERVK	-10760	NM_152824	76938	Mm.182769	NM_152824	ENSMUSG00000037197	Rbm17	2700027J02Rik	RNA binding motif protein 17	protein-coding
MACS_peak_12092	chr2	11621397	11621905	+	Intergenic	Intergenic	-5269	NM_001271498	16169	Mm.200196	NM_008358	ENSMUSG00000023206	Il15ra	AA690181|IL-15RA	interleukin 15 receptor, alpha chain	protein-coding
MACS_peak_12093	chr2	11857848	11858483	+	Intergenic	RMER16-int|LTR|ERVK	158785	NM_177268	320816	Mm.260201	NM_177268		Ankrd16	2810455F06Rik|AI646698|D430029B21Rik	ankyrin repeat domain 16	protein-coding
MACS_peak_12096	chr2	12479275	12479949	+	Intergenic	BGLII|LTR|ERVK	-138525	NM_024185	66960	Mm.34059	NM_024185	ENSMUSG00000026767	Fam188a	1810041E18Rik|2310047O13Rik|5830410F13Rik|AI447827|AW111958	family with sequence similarity 188, member A	protein-coding
MACS_peak_12097	chr2	12801813	12802421	+	Intergenic	RLTR13B1|LTR|ERVK	-43551	NM_008961	19212	Mm.229322	NM_008961	ENSMUSG00000026730	Pter	AI790318|Mpr56-1	phosphotriesterase related	protein-coding
MACS_peak_121	chr1	12681843	12682488	+	promoter-TSS (NM_001198565)	promoter-TSS (NM_001198565)	-346	NM_001198565	240725	Mm.45563	NM_172294	ENSMUSG00000016918	Sulf1	AI467640|AW121680|mKIAA1077	sulfatase 1	protein-coding
MACS_peak_12100	chr2	13496897	13497450	+	exon (NM_011701, exon 2 of 9)	exon (NM_011701, exon 2 of 9)	1235	NM_011701	22352	Mm.268000	NM_011701	ENSMUSG00000026728	Vim	-	vimentin	protein-coding
MACS_peak_12103	chr2	13618983	13619451	+	intron (NM_145838, intron 3 of 7)	intron (NM_145838, intron 3 of 7)	95930	NM_145838	241230	Mm.330004	NM_145838	ENSMUSG00000003418	St8sia6	1700007J08Rik|AI314453|AI875066|ST8SiaVI|Siat8f	ST8 alpha-N-acetyl-neuraminide alpha-2,8-sialyltransferase 6	protein-coding
MACS_peak_12106	chr2	13878050	13878665	+	Intergenic	Intergenic	99305	NM_001012396	30963	Mm.241205	NM_013935	ENSMUSG00000063275	Ptpla	HACD1	protein tyrosine phosphatase-like (proline instead of catalytic arginine), member a	protein-coding
MACS_peak_1211	chr1	134916759	134917218	+	intron (NM_008575, intron 1 of 11)	RLTR23|LTR|ERV1	4937	NM_008575	17248	Mm.426531	NM_008575	ENSMUSG00000054387	Mdm4	4933417N07Rik|AA414968|AL023055|AU018793|AU021806|C85810|Mdmx	transformed mouse 3T3 cell double minute 4	protein-coding
MACS_peak_12110	chr2	14268274	14268978	+	Intergenic	MMETn-int|LTR|ERVK	-41399	NM_001012305	277468	Mm.44662	NM_001012305	ENSMUSG00000036949	Slc39a12	AW046938|Gm731	solute carrier family 39 (zinc transporter), member 12	protein-coding
MACS_peak_12111	chr2	14304845	14305606	+	Intergenic	IAPEz-int|LTR|ERVK	-4800	NM_001012305	277468	Mm.44662	NM_001012305	ENSMUSG00000036949	Slc39a12	AW046938|Gm731	solute carrier family 39 (zinc transporter), member 12	protein-coding
MACS_peak_12113	chr2	14466706	14467189	+	Intergenic	Intergenic	-58986	NM_023116	12296	Mm.313930	NM_023116	ENSMUSG00000057914	Cacnb2	AW060387|CAB2|Cavbeta2|Cchb2	calcium channel, voltage-dependent, beta 2 subunit	protein-coding
MACS_peak_12118	chr2	15194958	15195608	+	Intergenic	MusHAL1|LINE|L1	218294	NM_029466	75869	Mm.174068	NM_029466		Arl5b	4930587A11Rik|AW146430|Arl8	ADP-ribosylation factor-like 5B	protein-coding
MACS_peak_12123	chr2	15939273	15939963	+	Intergenic	ETnERV2-int|LTR|ERVK	-338313	NM_026162	67448	Mm.313938	NM_026162	ENSMUSG00000026748	Plxdc2	1200007L24Rik|5430431D22Rik|AI646728|AU022916|AV231634|Tem7r	plexin domain containing 2	protein-coding
MACS_peak_12125	chr2	15954529	15954991	+	Intergenic	RLTR9E|LTR|ERVK	-323171	NM_026162	67448	Mm.313938	NM_026162	ENSMUSG00000026748	Plxdc2	1200007L24Rik|5430431D22Rik|AI646728|AU022916|AV231634|Tem7r	plexin domain containing 2	protein-coding
MACS_peak_12128	chr2	16776814	16777452	+	Intergenic	RLTR13B3|LTR|ERVK	158220	NR_040632	75069	Mm.50378	NR_040632		4930515L03Rik	-	RIKEN cDNA 4930515L03 gene	ncRNA
MACS_peak_12129	chr2	17015260	17015644	+	Intergenic	ORR1C2|LTR|MaLR	-80099	NR_040632	75069	Mm.50378	NR_040632		4930515L03Rik	-	RIKEN cDNA 4930515L03 gene	ncRNA
MACS_peak_12133	chr2	17525056	17525579	+	intron (NM_028757, intron 2 of 6)	intron (NM_028757, intron 2 of 6)	40176	NR_105847	102465964		NR_105847	miRBase:MI0021957	Mir6419	mmu-mir-6419	microRNA mir-6419	ncRNA
MACS_peak_12139	chr2	17864428	17865235	+	Intergenic	Intergenic	53742	NM_026627	68231	Mm.23887	NM_026627	ENSMUSG00000062651	H2afb1	1700113O17Rik|H2A.Bbd|H2al2|TSEG-1|Tseg1	H2A histone family, member B1	protein-coding
MACS_peak_12140	chr2	17904232	17904898	+	Intergenic	RLTR9A|LTR|ERVK	14008	NM_026627	68231	Mm.23887	NM_026627	ENSMUSG00000062651	H2afb1	1700113O17Rik|H2A.Bbd|H2al2|TSEG-1|Tseg1	H2A histone family, member B1	protein-coding
MACS_peak_12143	chr2	17985348	17985742	+	promoter-TSS (NM_001252560)	promoter-TSS (NM_001252560)	-667	NM_001252560	17354	Mm.209175	NM_010804	ENSMUSG00000026743	Mllt10	Af10|B130021D15Rik|D630001B22Rik|mKIAA4140	myeloid/lymphoid or mixed-lineage leukemia (trithorax homolog, Drosophila); translocated to, 10	protein-coding
MACS_peak_12145	chr2	18265064	18265700	+	intron (NM_007869, intron 1 of 11)	intron (NM_007869, intron 1 of 11)	49075	NM_001190817	13418	Mm.246674	NM_007869	ENSMUSG00000026740	Dnajc1	4733401K02Rik|AA960110|D230036H06Rik|Dnajl1|ERdj1|ERj1p|MTJ1	DnaJ (Hsp40) homolog, subfamily C, member 1	protein-coding
MACS_peak_12147	chr2	18381699	18382328	+	Intergenic	RMER16-int|LTR|ERVK	-67556	NM_007869	13418	Mm.246674	NM_007869	ENSMUSG00000026740	Dnajc1	4733401K02Rik|AA960110|D230036H06Rik|Dnajl1|ERdj1|ERj1p|MTJ1	DnaJ (Hsp40) homolog, subfamily C, member 1	protein-coding
MACS_peak_12149	chr2	18416300	18416906	+	Intergenic	RLTR13B4|LTR|ERVK	-102146	NM_007869	13418	Mm.246674	NM_007869	ENSMUSG00000026740	Dnajc1	4733401K02Rik|AA960110|D230036H06Rik|Dnajl1|ERdj1|ERj1p|MTJ1	DnaJ (Hsp40) homolog, subfamily C, member 1	protein-coding
MACS_peak_1215	chr1	134991805	134992621	+	intron (NM_001099276, intron 23 of 32)	intron (NM_001099276, intron 23 of 32)	-35530	NM_133819	108954	Mm.293628	NM_133819	ENSMUSG00000046062	Ppp1r15b	1810033K10Rik|AI606441|C530022L24Rik|CReP	protein phosphatase 1, regulatory (inhibitor) subunit 15b	protein-coding
MACS_peak_12150	chr2	18508549	18509187	+	Intergenic	Intergenic	-85221	NM_147778	12238	Mm.249586	NM_147778	ENSMUSG00000051154	Commd3	AW550818|Bup|D2Ertd542e	COMM domain containing 3	protein-coding
MACS_peak_12154	chr2	19197848	19198358	+	intron (NM_001081083, intron 10 of 19)	intron (NM_001081083, intron 10 of 19)	77358	NM_001081083	70882	Mm.276696	NM_001081083	ENSMUSG00000037683	Armc3	4921513G22Rik	armadillo repeat containing 3	protein-coding
MACS_peak_12158	chr2	19593655	19594281	+	Intergenic	Intergenic	14279	NM_027715	71198	Mm.83981	NM_027715	ENSMUSG00000043415	Otud1	4933428L19Rik	OTU domain containing 1	protein-coding
MACS_peak_1216	chr1	134997918	134998538	+	intron (NM_001099276, intron 28 of 32)	intron (NM_001099276, intron 28 of 32)	-29515	NM_133819	108954	Mm.293628	NM_133819	ENSMUSG00000046062	Ppp1r15b	1810033K10Rik|AI606441|C530022L24Rik|CReP	protein phosphatase 1, regulatory (inhibitor) subunit 15b	protein-coding
MACS_peak_12161	chr2	20130815	20131512	+	Intergenic	RLTR17|LTR|ERVK	-80377	NM_001081006	208618	Mm.237935	NM_029895	ENSMUSG00000036617	Etl4	6620402G01Rik|9430077C05Rik|BC026657|E330027G05Rik|Etl-4|Skt	enhancer trap locus 4	protein-coding
MACS_peak_12166	chr2	20407719	20408282	+	intron (NM_001081006, intron 2 of 21)	intron (NM_001081006, intron 2 of 21)	-23674	NM_029895	208618	Mm.237935	NM_029895	ENSMUSG00000036617	Etl4	6620402G01Rik|9430077C05Rik|BC026657|E330027G05Rik|Etl-4|Skt	enhancer trap locus 4	protein-coding
MACS_peak_12167	chr2	20417787	20418424	+	intron (NM_001081006, intron 2 of 21)	intron (NM_001081006, intron 2 of 21)	-13569	NM_029895	208618	Mm.237935	NM_029895	ENSMUSG00000036617	Etl4	6620402G01Rik|9430077C05Rik|BC026657|E330027G05Rik|Etl-4|Skt	enhancer trap locus 4	protein-coding
MACS_peak_12169	chr2	20421561	20422252	+	intron (NM_001081006, intron 2 of 21)	RLTRETN_Mm|LTR|ERVK	-9768	NM_029895	208618	Mm.237935	NM_029895	ENSMUSG00000036617	Etl4	6620402G01Rik|9430077C05Rik|BC026657|E330027G05Rik|Etl-4|Skt	enhancer trap locus 4	protein-coding
MACS_peak_12175	chr2	20518865	20519243	+	intron (NM_001081006, intron 3 of 21)	intron (NM_001081006, intron 3 of 21)	77914	NM_001177631	208618	Mm.237935	NM_029895	ENSMUSG00000036617	Etl4	6620402G01Rik|9430077C05Rik|BC026657|E330027G05Rik|Etl-4|Skt	enhancer trap locus 4	protein-coding
MACS_peak_12178	chr2	20576086	20577527	+	intron (NM_001081006, intron 3 of 21)	intron (NM_001081006, intron 3 of 21)	135666	NM_001177631	208618	Mm.237935	NM_029895	ENSMUSG00000036617	Etl4	6620402G01Rik|9430077C05Rik|BC026657|E330027G05Rik|Etl-4|Skt	enhancer trap locus 4	protein-coding
MACS_peak_12179	chr2	20587286	20587821	+	intron (NM_001081006, intron 4 of 21)	intron (NM_001081006, intron 4 of 21)	146413	NM_001177631	208618	Mm.237935	NM_029895	ENSMUSG00000036617	Etl4	6620402G01Rik|9430077C05Rik|BC026657|E330027G05Rik|Etl-4|Skt	enhancer trap locus 4	protein-coding
MACS_peak_1218	chr1	135027023	135027663	+	promoter-TSS (NM_133819)	promoter-TSS (NM_133819)	-400	NM_133819	108954	Mm.293628	NM_133819	ENSMUSG00000046062	Ppp1r15b	1810033K10Rik|AI606441|C530022L24Rik|CReP	protein phosphatase 1, regulatory (inhibitor) subunit 15b	protein-coding
MACS_peak_12180	chr2	20588993	20589436	+	intron (NM_001081006, intron 4 of 21)	B2_Mm1t|SINE|B2	148074	NM_001177631	208618	Mm.237935	NM_029895	ENSMUSG00000036617	Etl4	6620402G01Rik|9430077C05Rik|BC026657|E330027G05Rik|Etl-4|Skt	enhancer trap locus 4	protein-coding
MACS_peak_12182	chr2	20590661	20591579	+	intron (NM_001081006, intron 4 of 21)	intron (NM_001081006, intron 4 of 21)	149980	NM_001177631	208618	Mm.237935	NM_029895	ENSMUSG00000036617	Etl4	6620402G01Rik|9430077C05Rik|BC026657|E330027G05Rik|Etl-4|Skt	enhancer trap locus 4	protein-coding
MACS_peak_12187	chr2	20659077	20660005	+	intron (NM_001081006, intron 6 of 21)	intron (NM_001081006, intron 6 of 21)	218401	NM_001177631	208618	Mm.237935	NM_029895	ENSMUSG00000036617	Etl4	6620402G01Rik|9430077C05Rik|BC026657|E330027G05Rik|Etl-4|Skt	enhancer trap locus 4	protein-coding
MACS_peak_12189	chr2	20851662	20852213	+	intron (NM_001128084, intron 1 of 24)	intron (NM_001128084, intron 1 of 24)	37411	NM_001081364	71435	Mm.28507	NM_001081364	ENSMUSG00000036591	Arhgap21	5530401C11Rik|AA416458|ARHGAP10	Rho GTPase activating protein 21	protein-coding
MACS_peak_12190	chr2	20855934	20856482	+	intron (NM_001128084, intron 1 of 24)	intron (NM_001128084, intron 1 of 24)	33140	NM_001081364	71435	Mm.28507	NM_001081364	ENSMUSG00000036591	Arhgap21	5530401C11Rik|AA416458|ARHGAP10	Rho GTPase activating protein 21	protein-coding
MACS_peak_12192	chr2	20913124	20913643	+	Intergenic	ORR1D1|LTR|MaLR	22882	NR_033225	433408	Mm.386941	NR_033225		Gm13375	OTTMUSG00000011664	predicted gene 13375	ncRNA
MACS_peak_12195	chr2	21314140	21315153	+	intron (NM_001004761, intron 1 of 10)	Lx9|LINE|L1	25452	NM_001004761	241263	Mm.166647	NM_175706	ENSMUSG00000045967	Gpr158	5330427M13Rik|mKIAA1136	G protein-coupled receptor 158	protein-coding
MACS_peak_12199	chr2	21898259	21898888	+	Intergenic	Intergenic	-250557	NM_148413	667663	Mm.330033	NM_148413	ENSMUSG00000025716	Myo3a	9030416P08Rik	myosin IIIA	protein-coding
MACS_peak_12205	chr2	22345950	22346474	+	intron (NM_148413, intron 20 of 33)	RLTR17|LTR|ERVK	-131635	NM_008078	14417	Mm.4784	NM_008078	ENSMUSG00000026787	Gad2	6330404F12Rik|GAD(65)|GAD65|Gad-2	glutamic acid decarboxylase 2	protein-coding
MACS_peak_12206	chr2	22475344	22475998	+	Intergenic	Intergenic	-2176	NM_008078	14417	Mm.4784	NM_008078	ENSMUSG00000026787	Gad2	6330404F12Rik|GAD(65)|GAD65|Gad-2	glutamic acid decarboxylase 2	protein-coding
MACS_peak_1221	chr1	135151968	135152511	+	intron (NR_037984, intron 3 of 3)	intron (NR_037984, intron 3 of 3)	9565	NM_182930	240753	Mm.253559	NM_182930	ENSMUSG00000041757	Plekha6	9530028L01Rik|AU042621|Pepp3	pleckstrin homology domain containing, family A member 6	protein-coding
MACS_peak_12211	chr2	23044560	23045092	+	intron (NM_013771, intron 12 of 18)	Lx9|LINE|L1	-18170	NM_027635	70981	Mm.314026	NM_027635	ENSMUSG00000026774	4931423N10Rik	-	RIKEN cDNA 4931423N10 gene	protein-coding
MACS_peak_12215	chr2	23445433	23445949	+	Intergenic	LTRIS2|LTR|ERV1	-18067	NM_001165997	76857	Mm.276415	NM_029773	ENSMUSG00000026771	Spopl	4921517N04Rik|AU014935|BB233739|E430033K04Rik	speckle-type POZ protein-like	protein-coding
MACS_peak_12216	chr2	23762616	23763227	+	Intergenic	RLTR13D6|LTR|ERVK	141978	NM_080462	140483	Mm.33120	NM_080462	ENSMUSG00000026986	Hnmt	1500031F01Rik|AI788969	histamine N-methyltransferase	protein-coding
MACS_peak_12217	chr2	23763979	23764830	+	Intergenic	MMETn-int|LTR|ERVK	140495	NM_080462	140483	Mm.33120	NM_080462	ENSMUSG00000026986	Hnmt	1500031F01Rik|AI788969	histamine N-methyltransferase	protein-coding
MACS_peak_1222	chr1	135236834	135237526	+	Intergenic	RMER16|LTR|ERVK	-9963	NM_031193	19702	Mm.220955	NM_031193		Ren2	Ren|Ren-2|Ren-B|Rn-2|Rnr	renin 2 tandem duplication of Ren1	protein-coding
MACS_peak_12224	chr2	24298781	24299224	+	intron (NM_011040, intron 3 of 11)	intron (NM_011040, intron 3 of 11)	32117	NM_011040	18510	Mm.2533	NM_011040	ENSMUSG00000026976	Pax8	Pax-8	paired box 8	protein-coding
MACS_peak_12225	chr2	24718415	24719051	+	intron (NM_001012518, intron 6 of 26)	intron (NM_001012518, intron 6 of 26)	56396	NM_172545	77683	Mm.24176	NM_172545	ENSMUSG00000036893	Ehmt1	9230102N17Rik|D330003E03|Eu-HMTase1|GLP|GLP1|KMT1D|mKIAA1876	euchromatic histone methyltransferase 1	protein-coding
MACS_peak_12226	chr2	24765907	24766428	+	intron (NM_001012518, intron 1 of 26)	B3A|SINE|B2	8962	NM_172545	77683	Mm.24176	NM_172545	ENSMUSG00000036893	Ehmt1	9230102N17Rik|D330003E03|Eu-HMTase1|GLP|GLP1|KMT1D|mKIAA1876	euchromatic histone methyltransferase 1	protein-coding
MACS_peak_12227	chr2	24767429	24768343	+	intron (NM_001012518, intron 1 of 26)	RLTR18|LTR|ERVK	7243	NM_172545	77683	Mm.24176	NM_172545	ENSMUSG00000036893	Ehmt1	9230102N17Rik|D330003E03|Eu-HMTase1|GLP|GLP1|KMT1D|mKIAA1876	euchromatic histone methyltransferase 1	protein-coding
MACS_peak_12229	chr2	25013212	25013674	+	Intergenic	L1MB3|LINE|L1	-22835	NM_025980	67122	Mm.46539	NM_025980	ENSMUSG00000078202	Nrarp	2700054M22Rik	Notch-regulated ankyrin repeat protein	protein-coding
MACS_peak_12231	chr2	25083939	25084568	+	TTS (NM_080854)	TTS (NM_080854)	-4031	NM_146116	227613	Mm.227260	NM_146116	ENSMUSG00000036752	Tubb4b	4930542G03Rik|Tubb2c|Tubb2c1	tubulin, beta 4B class IVB	protein-coding
MACS_peak_12232	chr2	25148407	25148790	+	intron (NM_008169, intron 19 of 19)	intron (NM_008169, intron 19 of 19)	1858	NM_001242940	320354	Mm.445875	NM_001242940		Grin1os	E130003G02Rik	glutamate receptor, ionotropic, NMDA1 (zeta 1), opposite strand	protein-coding
MACS_peak_12237	chr2	25463880	25464425	+	promoter-TSS (NM_001024616)	promoter-TSS (NM_001024616)	-186	NM_001024616	227624	Mm.29600	NM_001024616	ENSMUSG00000015087	Rabl6	B230208H17Rik|Rbel1|Rbel1a|Rbel1b|parf	RAB, member RAS oncogene family-like 6	protein-coding
MACS_peak_12238	chr2	25910539	25911540	+	TTS (NM_001037098)	TTS (NM_001037098)	-33759	NM_133835	98766	Mm.247824	NM_133835	ENSMUSG00000036352	Ubac1	1110033G07Rik|AA407978|GBDR1|Gdbr1|Ubadc1	ubiquitin associated domain containing 1	protein-coding
MACS_peak_12239	chr2	25947491	25947955	+	5' UTR (NM_001037098, exon 1 of 6)	5' UTR (NM_001037098, exon 1 of 6)	193	NM_001037098	67991	Mm.131074	NM_026495	ENSMUSG00000026932	Nacc2	0610020I02Rik|AI448087|Btbd14a|C030048H19Rik	nucleus accumbens associated 2, BEN and BTB (POZ) domain containing	protein-coding
MACS_peak_12244	chr2	26358377	26358862	+	intron (NM_008714, intron 1 of 33)	CpG	723	NM_008714	18128	Mm.290610	NM_008714	ENSMUSG00000026923	Notch1	9930111A19Rik|Mis6|N1|Tan1|lin-12	notch 1	protein-coding
MACS_peak_12250	chr2	26740805	26741562	+	Intergenic	ETnERV2-int|LTR|ERVK	17150	NM_009298	20935	Mm.245577	NM_009298	ENSMUSG00000036160	Surf6	D2Wsu129e|Surf-6	surfeit gene 6	protein-coding
MACS_peak_12252	chr2	27341548	27342077	+	Intergenic	Intergenic	-10619	NM_001113574	67382	Mm.28721	NM_023336	ENSMUSG00000026918	Brd3	2410084F24Rik|AW060456|Fsrg2|ORFX|RINGL3	bromodomain containing 3	protein-coding
MACS_peak_12253	chr2	27401134	27402195	+	Intergenic	RLTR13B1|LTR|ERVK	30997	NM_080848	140858	Mm.28265	NM_080848	ENSMUSG00000026917	Wdr5	2410008O07Rik|AA408785|AA960360|Big|Big-3	WD repeat domain 5	protein-coding
MACS_peak_12254	chr2	27500093	27500766	+	Intergenic	Intergenic	-32292	NM_011305	20181	Mm.24624	NM_011305	ENSMUSG00000015846	Rxra	9530071D11Rik|Nr2b1|RXRalpha1	retinoid X receptor alpha	protein-coding
MACS_peak_12256	chr2	27647046	27647586	+	Intergenic	Intergenic	81213	NM_001290482	20181	Mm.24624	NM_011305	ENSMUSG00000015846	Rxra	9530071D11Rik|Nr2b1|RXRalpha1	retinoid X receptor alpha	protein-coding
MACS_peak_12259	chr2	28361676	28362346	+	Intergenic	Intergenic	-6676	NM_009058	19730	Mm.5236	NM_009058	ENSMUSG00000026821	Ralgds	Gnds|Rgds|mKIAA1308	ral guanine nucleotide dissociation stimulator	protein-coding
MACS_peak_12261	chr2	28403257	28403783	+	intron (NM_001145836, intron 11 of 17)	intron (NM_001145836, intron 11 of 17)	14536	NM_001145836	19730	Mm.5236	NM_009058	ENSMUSG00000026821	Ralgds	Gnds|Rgds|mKIAA1308	ral guanine nucleotide dissociation stimulator	protein-coding
MACS_peak_12265	chr2	28922258	28922673	+	intron (NM_009442, intron 2 of 11)	intron (NM_009442, intron 2 of 11)	6682	NM_009442	22130	Mm.252195	NM_009442	ENSMUSG00000026803	Ttf1	AV245725|TTF-1|TTF-I	transcription termination factor, RNA polymerase I	protein-coding
MACS_peak_12266	chr2	28931126	28931573	+	intron (NM_009442, intron 7 of 11)	RMER16|LTR|ERVK	15566	NM_009442	22130	Mm.252195	NM_009442	ENSMUSG00000026803	Ttf1	AV245725|TTF-1|TTF-I	transcription termination factor, RNA polymerase I	protein-coding
MACS_peak_12268	chr2	28976336	28977188	+	Intergenic	Intergenic	-3750	NM_198033	269254	Mm.41867	NM_198033	ENSMUSG00000043535	Setx	A130090N03|A930037J23Rik|AOA2|AW060766|Als4|SCAR1|Sen1|mKIAA0625	senataxin	protein-coding
MACS_peak_12270	chr2	29007341	29008126	+	intron (NM_198033, intron 11 of 25)	intron (NM_198033, intron 11 of 25)	27221	NM_198033	269254	Mm.41867	NM_198033	ENSMUSG00000043535	Setx	A130090N03|A930037J23Rik|AOA2|AW060766|Als4|SCAR1|Sen1|mKIAA0625	senataxin	protein-coding
MACS_peak_12272	chr2	29152298	29152853	+	Intergenic	Intergenic	-44062	NR_029460	76220	Mm.330108	NR_029460		6530402F18Rik	mKIAA1857	RIKEN cDNA 6530402F18 gene	ncRNA
MACS_peak_12273	chr2	29313862	29314380	+	intron (NM_001290489, intron 2 of 6)	ORR1C1|LTR|MaLR	16693	NR_105753	102465170		NR_105753	miRBase:MI0021863	Mir133c	mmu-mir-133c	microRNA mir-133c	ncRNA
MACS_peak_12275	chr2	29407506	29408113	+	Intergenic	Intergenic	-67431	NM_054050	107746	Mm.298274	NM_054050	ENSMUSG00000039844	Rapgef1	4932418O06Rik|C3G|Grf2	Rap guanine nucleotide exchange factor (GEF) 1	protein-coding
MACS_peak_12277	chr2	29429122	29429501	+	Intergenic	Intergenic	-45929	NM_054050	107746	Mm.298274	NM_054050	ENSMUSG00000039844	Rapgef1	4932418O06Rik|C3G|Grf2	Rap guanine nucleotide exchange factor (GEF) 1	protein-coding
MACS_peak_12288	chr2	29675728	29676451	+	Intergenic	Intergenic	-6820	NM_026615	68205	Mm.20273	NM_026615	ENSMUSG00000069020	Urm1	2900073H19Rik	ubiquitin related modifier 1 homolog (S. cerevisiae)	protein-coding
MACS_peak_1229	chr1	135560116	135560805	+	Intergenic	MER102b|DNA|MER1_type	-2484	NM_144530	70579	Mm.245357	NM_144530	ENSMUSG00000026464	Zc3h11a	1110003F06Rik|5730454B08Rik|G630041M05Rik|Zc3hdc11a|Zc3hh11a|mKIAA0663	zinc finger CCCH type containing 11A	protein-coding
MACS_peak_12293	chr2	29766356	29767090	+	intron (NM_013615, intron 8 of 16)	B2_Mm1a|SINE|B2	21140	NM_013615	18286	Mm.330116	NM_013615	ENSMUSG00000026790	Odf2	AI848335|MMTEST29	outer dense fiber of sperm tails 2	protein-coding
MACS_peak_12296	chr2	29897942	29898600	+	intron (NM_001008498, intron 1 of 8)	intron (NM_001008498, intron 1 of 8)	6128	NM_001008498	71820	Mm.88053	NM_001008498	ENSMUSG00000039715	Wdr34	3200002I06Rik	WD repeat domain 34	protein-coding
MACS_peak_12297	chr2	29904358	29905104	+	promoter-TSS (NM_001008498)	promoter-TSS (NM_001008498)	-332	NM_001008498	71820	Mm.88053	NM_001008498	ENSMUSG00000039715	Wdr34	3200002I06Rik	WD repeat domain 34	protein-coding
MACS_peak_123	chr1	12734374	12735271	+	intron (NM_001198565, intron 2 of 21)	intron (NM_001198565, intron 2 of 21)	26196	NM_172294	240725	Mm.45563	NM_172294	ENSMUSG00000016918	Sulf1	AI467640|AW121680|mKIAA1077	sulfatase 1	protein-coding
MACS_peak_1230	chr1	135563938	135565181	+	Intergenic	RLTR12B|LTR|ERVK	-6583	NM_144530	70579	Mm.245357	NM_144530	ENSMUSG00000026464	Zc3h11a	1110003F06Rik|5730454B08Rik|G630041M05Rik|Zc3hdc11a|Zc3hh11a|mKIAA0663	zinc finger CCCH type containing 11A	protein-coding
MACS_peak_12301	chr2	29975141	29975729	+	intron (NM_178694, intron 1 of 15)	L2a|LINE|L2	4696	NM_178694	227693	Mm.44526	NM_178694	ENSMUSG00000039686	Zer1	C230075L19Rik|Zyg11bl	zyg-11 related, cell cycle regulator	protein-coding
MACS_peak_12307	chr2	30190673	30191378	+	intron (NM_198304, intron 30 of 43)	Lx6|LINE|L1	23811	NM_139302	227700	Mm.33343	NM_139302	ENSMUSG00000026860	Sh3glb2	SPAS-1	SH3-domain GRB2-like endophilin B2	protein-coding
MACS_peak_1231	chr1	135565846	135566504	+	Intergenic	B1_Mus1|SINE|Alu	-8199	NM_144530	70579	Mm.245357	NM_144530	ENSMUSG00000026464	Zc3h11a	1110003F06Rik|5730454B08Rik|G630041M05Rik|Zc3hdc11a|Zc3hh11a|mKIAA0663	zinc finger CCCH type containing 11A	protein-coding
MACS_peak_12310	chr2	30297145	30297783	+	intron (NM_138748, intron 8 of 9)	intron (NM_138748, intron 8 of 9)	25894	NM_138748	110854	Mm.275393	NM_138748	ENSMUSG00000039515	Ppp2r4	2610042B21Rik|C77440|N28142|PR53	protein phosphatase 2A activator, regulatory subunit B	protein-coding
MACS_peak_12311	chr2	30300851	30301156	+	intron (NM_138748, intron 9 of 9)	intron (NM_138748, intron 9 of 9)	28716	NM_030244	72500	Mm.295464	NM_030244	ENSMUSG00000089762	Ier5l	2610524G09Rik	immediate early response 5-like	protein-coding
MACS_peak_12313	chr2	30433602	30433946	+	Intergenic	RMER10B|LTR|ERVL	-16790	NM_030137	78617	Mm.40413	NM_030137	ENSMUSG00000047363	Cstad	9530039B02Rik	CSA-conditional, T cell activation-dependent protein	protein-coding
MACS_peak_12314	chr2	30581051	30581641	+	Intergenic	Intergenic	4616	NR_037272	100526499		NR_037272	miRBase:MI0014082	Mir3089	mmu-mir-3089	microRNA 3089	ncRNA
MACS_peak_12315	chr2	30593061	30593774	+	Intergenic	Intergenic	16687	NR_037272	100526499		NR_037272	miRBase:MI0014082	Mir3089	mmu-mir-3089	microRNA 3089	ncRNA
MACS_peak_1232	chr1	135590740	135591644	+	Intergenic	Intergenic	-4507	NM_001159649	240754	Mm.36534	NM_172842	ENSMUSG00000051998	Lax1	A530029E09|E430019B13Rik	lymphocyte transmembrane adaptor 1	protein-coding
MACS_peak_12321	chr2	30683494	30684071	+	promoter-TSS (NM_133346)	promoter-TSS (NM_133346)	38	NM_133346	72323	Mm.27656	NM_133346		Asb6	2510004M11Rik|AA409356	ankyrin repeat and SOCS box-containing 6	protein-coding
MACS_peak_12323	chr2	30775337	30775927	+	Intergenic	ID_B1|SINE|B4	-16815	NM_022415	64292	Mm.28768	NM_022415	ENSMUSG00000050737	Ptges	2410099E23Rik|D2Ertd369e|Pges|mPGES|mPGES-1	prostaglandin E synthase	protein-coding
MACS_peak_12324	chr2	30782674	30783195	+	Intergenic	Intergenic	-24117	NM_022415	64292	Mm.28768	NM_022415	ENSMUSG00000050737	Ptges	2410099E23Rik|D2Ertd369e|Pges|mPGES|mPGES-1	prostaglandin E synthase	protein-coding
MACS_peak_12325	chr2	30793073	30793728	+	Intergenic	MT2A|LTR|ERVL	-15121	NM_133673	30934	Mm.249164	NM_133673	ENSMUSG00000026848	Tor1b	2610016F05Rik|DQ1|torsinB	torsin family 1, member B	protein-coding
MACS_peak_12326	chr2	30798299	30798756	+	Intergenic	Intergenic	-9994	NM_133673	30934	Mm.249164	NM_133673	ENSMUSG00000026848	Tor1b	2610016F05Rik|DQ1|torsinB	torsin family 1, member B	protein-coding
MACS_peak_12327	chr2	30803984	30804485	+	Intergenic	Intergenic	-4287	NM_133673	30934	Mm.249164	NM_133673	ENSMUSG00000026848	Tor1b	2610016F05Rik|DQ1|torsinB	torsin family 1, member B	protein-coding
MACS_peak_12330	chr2	30915775	30916321	+	intron (NM_001038700, intron 6 of 14)	ORR1B1|LTR|MaLR	35972	NM_001177650	14269	Mm.52297	NM_019406	ENSMUSG00000075415	Fnbp1	1110057E06Rik|2210010H06Rik|FBP1|Fbp17	formin binding protein 1	protein-coding
MACS_peak_12331	chr2	30946527	30947322	+	intron (NM_001038700, intron 4 of 14)	intron (NM_001038700, intron 4 of 14)	5096	NM_001177650	14269	Mm.52297	NM_019406	ENSMUSG00000075415	Fnbp1	1110057E06Rik|2210010H06Rik|FBP1|Fbp17	formin binding protein 1	protein-coding
MACS_peak_12333	chr2	30986312	30986910	+	intron (NM_001038700, intron 1 of 14)	B3A|SINE|B2	10917	NM_001177649	14269	Mm.52297	NM_019406	ENSMUSG00000075415	Fnbp1	1110057E06Rik|2210010H06Rik|FBP1|Fbp17	formin binding protein 1	protein-coding
MACS_peak_12336	chr2	31018767	31019802	+	intron (NM_178760, intron 1 of 17)	intron (NM_178760, intron 1 of 17)	11448	NM_178760	277463	Mm.236074	NM_178760		Gpr107	9930033D15Rik|AI790205|C530034M11|mKIAA1624	G protein-coupled receptor 107	protein-coding
MACS_peak_12337	chr2	31031905	31032377	+	intron (NM_178760, intron 6 of 17)	B2_Mm2|SINE|B2	24305	NM_178760	277463	Mm.236074	NM_178760		Gpr107	9930033D15Rik|AI790205|C530034M11|mKIAA1624	G protein-coupled receptor 107	protein-coding
MACS_peak_12338	chr2	31146854	31147317	+	intron (NM_019681, intron 7 of 7)	intron (NM_019681, intron 7 of 7)	45642	NM_019681	14299	Mm.249318	NM_019681	ENSMUSG00000062661	Ncs1	9430075O15Rik|A730032G13Rik|AI836659|Freq|Mfreq|NCS-1	neuronal calcium sensor 1	protein-coding
MACS_peak_12340	chr2	31357986	31358556	+	intron (NM_007494, intron 12 of 15)	intron (NM_007494, intron 12 of 15)	32481	NM_007494	11898	Mm.3217	NM_007494	ENSMUSG00000076441	Ass1	AA408052|ASS|Ass-1|fold	argininosuccinate synthetase 1	protein-coding
MACS_peak_12341	chr2	31427182	31428035	+	promoter-TSS (NM_001290548)	promoter-TSS (NM_001290548)	-563	NM_001033389	320267	Mm.207261	NM_001033389	ENSMUSG00000026843	Fubp3	A330051M14Rik|AV006371|FBP3|Marta2	far upstream element (FUSE) binding protein 3	protein-coding
MACS_peak_12342	chr2	31447163	31447712	+	intron (NM_001033389, intron 2 of 17)	intron (NM_001033389, intron 2 of 17)	19266	NM_001290548	320267	Mm.207261	NM_001033389	ENSMUSG00000026843	Fubp3	A330051M14Rik|AV006371|FBP3|Marta2	far upstream element (FUSE) binding protein 3	protein-coding
MACS_peak_12345	chr2	31614327	31614850	+	promoter-TSS (NM_009594)	promoter-TSS (NM_009594)	-871	NM_009594	11350	Mm.1318	NM_009594	ENSMUSG00000026842	Abl1	AI325092|Abl|E430008G22Rik|c-Abl	c-abl oncogene 1, non-receptor tyrosine kinase	protein-coding
MACS_peak_12346	chr2	31634751	31635333	+	intron (NM_001283045, intron 3 of 10)	ORR1C2|LTR|MaLR	19349	NM_001283045	11350	Mm.1318	NM_009594	ENSMUSG00000026842	Abl1	AI325092|Abl|E430008G22Rik|c-Abl	c-abl oncogene 1, non-receptor tyrosine kinase	protein-coding
MACS_peak_12347	chr2	31770688	31771183	+	intron (NM_011836, intron 11 of 27)	T-rich|Low_complexity|Low_complexity	28134	NM_011836	23928	Mm.302362	NM_011836	ENSMUSG00000026840	Lamc3	AI562206|AW240805	laminin gamma 3	protein-coding
MACS_peak_12350	chr2	32016425	32016947	+	intron (NM_172661, intron 1 of 29)	B3|SINE|B2	10018	NM_001159634	227723	Mm.25504	NM_172661	ENSMUSG00000039262	Prrc2b	5830434P21Rik|AI173903|Bat2l|Bat2l1|D430039P21|mKIAA0515	proline-rich coiled-coil 2B	protein-coding
MACS_peak_12351	chr2	32018057	32018506	+	intron (NM_172661, intron 1 of 29)	intron (NM_172661, intron 1 of 29)	11613	NM_001159634	227723	Mm.25504	NM_172661	ENSMUSG00000039262	Prrc2b	5830434P21Rik|AI173903|Bat2l|Bat2l1|D430039P21|mKIAA0515	proline-rich coiled-coil 2B	protein-coding
MACS_peak_12352	chr2	32091812	32092422	+	promoter-TSS (NM_145145)	promoter-TSS (NM_145145)	-86	NM_145145	99011	Mm.31192	NM_145145	ENSMUSG00000039254	Pomt1	AI505244	protein-O-mannosyltransferase 1	protein-coding
MACS_peak_1236	chr1	136085263	136086056	+	intron (NM_007695, intron 8 of 9)	intron (NM_007695, intron 8 of 9)	-4366	NM_016749	53311	Mm.379067	NM_016749	ENSMUSG00000042451	Mybph	AI385643|MyBP-H	myosin binding protein H	protein-coding
MACS_peak_12362	chr2	32716049	32716900	+	Intergenic	RLTR11B|LTR|ERVK	-13717	NM_001113569	20910	Mm.278865	NM_009295	ENSMUSG00000026797	Stxbp1	AI317162|AI326233|MMS10-G|Ms10g|Munc-18a|Munc18-1|N-sec1|Rb-sec1|Sxtbp1|Unc18-1|Unc18h|nsec1	syntaxin binding protein 1	protein-coding
MACS_peak_12366	chr2	33010201	33010562	+	intron (NM_001290572, intron 12 of 17)	intron (NM_001290572, intron 12 of 17)	-61100	NM_011923	26360	Mm.208919	NM_011923	ENSMUSG00000004105	Angptl2	AI593246|AW260363|Arp2	angiopoietin-like 2	protein-coding
MACS_peak_12368	chr2	33140888	33141336	+	intron (NM_001290570, intron 3 of 16)	intron (NM_001290570, intron 3 of 16)	69631	NM_011923	26360	Mm.208919	NM_011923	ENSMUSG00000004105	Angptl2	AI593246|AW260363|Arp2	angiopoietin-like 2	protein-coding
MACS_peak_12372	chr2	33333982	33334737	+	Intergenic	RLTR11A2|LTR|ERVK	-10307	NM_001025594	71834	Mm.44186	NM_027947	ENSMUSG00000026788	Zbtb43	1700010E06Rik|Zfp297b|mKIAA0414	zinc finger and BTB domain containing 43	protein-coding
MACS_peak_12374	chr2	33471871	33472371	+	intron (NM_010725, intron 2 of 7)	intron (NM_010725, intron 2 of 7)	23910	NM_010725	16917	Mm.39825	NM_010725	ENSMUSG00000038765	Lmx1b	LMX1.1|LMX1.2	LIM homeobox transcription factor 1 beta	protein-coding
MACS_peak_12377	chr2	34219272	34219740	+	intron (NM_001290576, intron 2 of 7)	intron (NM_001290576, intron 2 of 7)	8059	NM_001290576	18516	Mm.239941	NM_016768	ENSMUSG00000038718	Pbx3	-	pre B cell leukemia homeobox 3	protein-coding
MACS_peak_12378	chr2	34255011	34255580	+	Intergenic	Intergenic	-6996	NM_001290625	227743	Mm.270866	NM_177345	ENSMUSG00000038696	Mapkap1	AI591529|D230039K05Rik|Sin1	mitogen-activated protein kinase associated protein 1	protein-coding
MACS_peak_12380	chr2	34349599	34350359	+	intron (NM_001290625, intron 4 of 11)	RLTR13B3|LTR|ERVK	87608	NM_001290626	227743	Mm.270866	NM_177345	ENSMUSG00000038696	Mapkap1	AI591529|D230039K05Rik|Sin1	mitogen-activated protein kinase associated protein 1	protein-coding
MACS_peak_12381	chr2	34425896	34426437	+	intron (NM_001290625, intron 8 of 11)	intron (NM_001290625, intron 8 of 11)	163795	NM_001290626	227743	Mm.270866	NM_177345	ENSMUSG00000038696	Mapkap1	AI591529|D230039K05Rik|Sin1	mitogen-activated protein kinase associated protein 1	protein-coding
MACS_peak_12388	chr2	35070888	35071296	+	Intergenic	MIRb|SINE|MIR	-14452	NM_026697	68365	Mm.198264	NM_026697	ENSMUSG00000026878	Rab14	0610030G24Rik|2810475J17Rik|A830021G03Rik|AI314285|AI649155|D030017L14Rik	RAB14, member RAS oncogene family	protein-coding
MACS_peak_1239	chr1	136281046	136281740	+	Intergenic	RLTR9E|LTR|ERVK	-1124	NM_173771	240755	Mm.67133	NM_173771	ENSMUSG00000050526	4933406M09Rik	-	RIKEN cDNA 4933406M09 gene	protein-coding
MACS_peak_12390	chr2	35346285	35346781	+	Intergenic	Intergenic	-29588	NM_001145821	14594	Mm.281124	NM_010283	ENSMUSG00000035778	Ggta1	AW108479|GALT|Gal|Ggta|Ggta-1|alpha3GalT	glycoprotein galactosyltransferase alpha 1, 3	protein-coding
MACS_peak_12391	chr2	35389750	35390133	+	Intergenic	MER34|LTR|ERV1	-24037	NM_001114125	69601	Mm.29629	NM_001001602	ENSMUSG00000026883	Dab2ip	2310011D08Rik|AI480459|Aip1|mKIAA1743	disabled 2 interacting protein	protein-coding
MACS_peak_12394	chr2	35701358	35701714	+	intron (NM_029774, intron 6 of 9)	intron (NM_029774, intron 6 of 9)	26826	NR_040618	77665	Mm.400558	NR_040618	ENSMUSG00000086449	9030204H09Rik	-	RIKEN cDNA 9030204H09 gene	ncRNA
MACS_peak_12396	chr2	35866790	35867164	+	Intergenic	CpG	-31833	NM_029774	74410	Mm.21591	NM_028921	ENSMUSG00000026885	Ttll11	4932702F08Rik|4933424A20Rik|AU043211|D2Ertd624e	tubulin tyrosine ligase-like family, member 11	protein-coding
MACS_peak_12403	chr2	36270594	36271457	+	Intergenic	RLTR13D6|LTR|ERVK	-5895	NM_146949	258951	Mm.377766	NM_146949	ENSMUSG00000094464	Olfr339	MOR136-3	olfactory receptor 339	protein-coding
MACS_peak_12404	chr2	36277371	36277815	+	exon (NM_146949, exon 1 of 1)	exon (NM_146949, exon 1 of 1)	673	NM_146949	258951	Mm.377766	NM_146949	ENSMUSG00000094464	Olfr339	MOR136-3	olfactory receptor 339	protein-coding
MACS_peak_12407	chr2	36675312	36675746	+	Intergenic	Intergenic	-6919	NM_206903	18328	Mm.377104	NM_206903	ENSMUSG00000075384	Olfr3	MOR136-14|Y71	olfactory receptor 3	protein-coding
MACS_peak_12409	chr2	36973224	36973605	+	Intergenic	Intergenic	-12246	NM_147051	259053	Mm.377810	NM_147051	ENSMUSG00000075377	Olfr362	MOR158-1	olfactory receptor 362	protein-coding
MACS_peak_12411	chr2	37115733	37116085	+	Intergenic	ETnERV2-int|LTR|ERVK	-6562	NM_001081010	545417	Mm.379955	NM_001081010		Olfr367-ps	EG545417|MOR128-1|ORL1283|OTTMUSG00000012147|Olfr367	olfactory receptor 367, pseudogene	protein-coding
MACS_peak_12412	chr2	37279285	37279690	+	Intergenic	B2_Mm1t|SINE|B2	-1064	NM_001290642	319817	Mm.288785	NM_001100591	ENSMUSG00000075376	Rc3h2	2900024N03Rik|9430019J22Rik|D930043C02Rik|Mnab|Rnf164	ring finger and CCCH-type zinc finger domains 2	protein-coding
MACS_peak_12418	chr2	38273446	38273920	+	Intergenic	Intergenic	66855	NM_010710	16870	Mm.142856	NM_010710	ENSMUSG00000000247	Lhx2	LH2A|Lh-2|Lim2|ap|apterous	LIM homeobox protein 2	protein-coding
MACS_peak_12419	chr2	38285488	38285925	+	Intergenic	Intergenic	78878	NM_010710	16870	Mm.142856	NM_010710	ENSMUSG00000000247	Lhx2	LH2A|Lh-2|Lim2|ap|apterous	LIM homeobox protein 2	protein-coding
MACS_peak_1242	chr1	136388617	136389484	+	Intergenic	RLTR17|LTR|ERVK	-2187	NM_145510	98710	Mm.198119	NM_145510	ENSMUSG00000042229	Rabif	AI842864|AW549708|E130318E12Rik|MSS4|RASGFR3	RAB interacting factor	protein-coding
MACS_peak_12420	chr2	38403252	38403809	+	intron (NM_001159631, intron 1 of 9)	Charlie16a|DNA|MER1_type	36134	NM_001159631	59126	Mm.143818	NM_021606	ENSMUSG00000026749	Nek6	1300007C09Rik	NIMA (never in mitosis gene a)-related expressed kinase 6	protein-coding
MACS_peak_12423	chr2	38477170	38477766	+	intron (NM_011187, intron 5 of 7)	intron (NM_011187, intron 5 of 7)	21958	NM_011187	19177	Mm.389251	NM_011187	ENSMUSG00000026750	Psmb7	AU020723|MC14	proteasome (prosome, macropain) subunit, beta type 7	protein-coding
MACS_peak_12425	chr2	38646036	38646350	+	intron (NM_010264, intron 3 of 10)	intron (NM_010264, intron 3 of 10)	-6158	NM_001159549	14536	Mm.439703	NM_010264	ENSMUSG00000063972	Nr6a1	1700113M01Rik|Gcnf|NCNF|RTR	nuclear receptor subfamily 6, group A, member 1	protein-coding
MACS_peak_12427	chr2	38780457	38781185	+	intron (NM_010264, intron 1 of 10)	CpG	1160	NM_010264	14536	Mm.439703	NM_010264	ENSMUSG00000063972	Nr6a1	1700113M01Rik|Gcnf|NCNF|RTR	nuclear receptor subfamily 6, group A, member 1	protein-coding
MACS_peak_1243	chr1	136397284	136398003	+	intron (NM_145510, intron 1 of 1)	ID_B1|SINE|B4	6406	NM_145510	98710	Mm.198119	NM_145510	ENSMUSG00000042229	Rabif	AI842864|AW549708|E130318E12Rik|MSS4|RASGFR3	RAB interacting factor	protein-coding
MACS_peak_12433	chr2	39323936	39324893	+	Intergenic	RLTR13B1|LTR|ERVK	-242556	NM_024209	67857	Mm.389242	NM_024209		Ppp6c	2310003C10Rik	protein phosphatase 6, catalytic subunit	protein-coding
MACS_peak_12436	chr2	39473430	39473841	+	Intergenic	RMER10A|LTR|ERVL	-391777	NM_024209	67857	Mm.389242	NM_024209		Ppp6c	2310003C10Rik	protein phosphatase 6, catalytic subunit	protein-coding
MACS_peak_1244	chr1	136404663	136405090	+	TTS (NM_145510)	TTS (NM_145510)	13639	NM_145510	98710	Mm.198119	NM_145510	ENSMUSG00000042229	Rabif	AI842864|AW549708|E130318E12Rik|MSS4|RASGFR3	RAB interacting factor	protein-coding
MACS_peak_12442	chr2	39711876	39712605	+	Intergenic	IAPEz-int|LTR|ERVK	-630382	NM_024209	67857	Mm.389242	NM_024209		Ppp6c	2310003C10Rik	protein phosphatase 6, catalytic subunit	protein-coding
MACS_peak_12449	chr2	40113624	40114030	+	Intergenic	RLTR13D6|LTR|ERVK	-1031969	NM_024209	67857	Mm.389242	NM_024209		Ppp6c	2310003C10Rik	protein phosphatase 6, catalytic subunit	protein-coding
MACS_peak_12450	chr2	40166174	40166739	+	Intergenic	RMER16|LTR|ERVK	-1084598	NM_024209	67857	Mm.389242	NM_024209		Ppp6c	2310003C10Rik	protein phosphatase 6, catalytic subunit	protein-coding
MACS_peak_12457	chr2	41377266	41377821	+	intron (NM_053011, intron 7 of 90)	RLTR13C1|LTR|ERVK	925545	NR_105754	102465171		NR_105754		Mir6336	mmu-mir-6336	microRNA mir-6336	ncRNA
MACS_peak_12458	chr2	42606100	42606600	+	Intergenic	IAPLTR1a_Mm|LTR|ERVK	-97232	NM_053011	94217	Mm.441398	NM_053011	ENSMUSG00000049252	Lrp1b	9630004P12Rik|LRP-DIT	low density lipoprotein-related protein 1B (deleted in tumors)	protein-coding
MACS_peak_12460	chr2	43221161	43221910	+	Intergenic	Intergenic	-189310	NM_001289593	70789	Mm.105278	NM_027552	ENSMUSG00000026866	Kynu	4432411A05Rik	kynureninase (L-kynurenine hydrolase)	protein-coding
MACS_peak_12463	chr2	43578128	43578679	+	Intergenic	Intergenic	-25941	NM_153820	76117	Mm.217350	NM_153820	ENSMUSG00000049744	Arhgap15	5830480G12Rik	Rho GTPase activating protein 15	protein-coding
MACS_peak_12464	chr2	43587876	43588364	+	Intergenic	ORR1C1|LTR|MaLR	-16224	NM_153820	76117	Mm.217350	NM_153820	ENSMUSG00000049744	Arhgap15	5830480G12Rik	Rho GTPase activating protein 15	protein-coding
MACS_peak_12469	chr2	44380553	44381392	+	Intergenic	Intergenic	336170	NM_172662	227835	Mm.314312	NM_172662	ENSMUSG00000036890	Gtdc1	E330008O22Rik	glycosyltransferase-like domain containing 1	protein-coding
MACS_peak_1247	chr1	136431413	136432578	+	Intergenic	Intergenic	14264	NM_001145300	71001	Mm.158529	NM_183292	ENSMUSG00000046367	Mgat4e	4931440L10Rik	MGAT4 family, member E	protein-coding
MACS_peak_12471	chr2	44636420	44636876	+	intron (NM_172662, intron 3 of 10)	L1_Mur3|LINE|L1	80494	NM_172662	227835	Mm.314312	NM_172662	ENSMUSG00000036890	Gtdc1	E330008O22Rik	glycosyltransferase-like domain containing 1	protein-coding
MACS_peak_12473	chr2	45013880	45014424	+	Intergenic	Intergenic	-45353	NM_015753	24136	Mm.440702	NM_015753	ENSMUSG00000026872	Zeb2	9130203F04Rik|D130016B08Rik|SIP1|Zfhx1b|Zfx1b|Zfxh1b	zinc finger E-box binding homeobox 2	protein-coding
MACS_peak_12479	chr2	46586102	46586432	+	Intergenic	RLTR9A|LTR|ERVK	1034142	NR_040497	69405	Mm.396184	NR_040497	ENSMUSG00000086202	1700019E08Rik	-	RIKEN cDNA 1700019E08 gene	ncRNA
MACS_peak_12480	chr2	47017261	47017622	+	Intergenic	RLTR25A|LTR|ERVK	1465316	NR_040497	69405	Mm.396184	NR_040497	ENSMUSG00000086202	1700019E08Rik	-	RIKEN cDNA 1700019E08 gene	ncRNA
MACS_peak_12487	chr2	49227046	49227677	+	Intergenic	Intergenic	-79645	NM_172663	227867	Mm.29167	NM_172663	ENSMUSG00000069495	Epc2	5830499L14|D2Ertd694e	enhancer of polycomb homolog 2 (Drosophila)	protein-coding
MACS_peak_12491	chr2	49903861	49904455	+	Intergenic	RLTR11A|LTR|ERVK	-17791	NR_033304	320343	Mm.130607	NM_177139	ENSMUSG00000050447	Lypd6	E130115E03Rik	LY6/PLAUR domain containing 6	protein-coding
MACS_peak_12492	chr2	50120775	50121162	+	Intergenic	Intergenic	31229	NM_133839	109129	Mm.29214	NM_133839	ENSMUSG00000026766	Mmadhc	2010311D03Rik|AI314967	methylmalonic aciduria (cobalamin deficiency) cblD type, with homocystinuria	protein-coding
MACS_peak_12493	chr2	50164696	50165168	+	intron (NR_040362, intron 1 of 2)	RLTR9B2|LTR|ERVK	12602	NR_040362	100502624	Mm.382825	NR_040361		Gm13483	OTTMUSG00000012382	predicted gene 13483	ncRNA
MACS_peak_12495	chr2	50228378	50228924	+	intron (NR_040362, intron 1 of 2)	B4A|SINE|B4	76321	NR_040362	100502624	Mm.382825	NR_040361		Gm13483	OTTMUSG00000012382	predicted gene 13483	ncRNA
MACS_peak_12499	chr2	50894217	50894701	+	Intergenic	Intergenic	110172	NM_028810	74194	Mm.46497	NM_028810	ENSMUSG00000017144	Rnd3	2610017M01Rik|AI661404|Arhe|Rhoe	Rho family GTPase 3	protein-coding
MACS_peak_125	chr1	12755222	12755737	+	intron (NM_001198565, intron 2 of 21)	intron (NM_001198565, intron 2 of 21)	46853	NM_172294	240725	Mm.45563	NM_172294	ENSMUSG00000016918	Sulf1	AI467640|AW121680|mKIAA1077	sulfatase 1	protein-coding
MACS_peak_1250	chr1	136852391	136852874	+	promoter-TSS (NM_001081307)	promoter-TSS (NM_001081307)	-115	NM_001081307	329251	Mm.188709	NM_001081307	ENSMUSG00000073557	Ppp1r12b	1810037O03Rik|9530009M10Rik|AI132431|Mypt2	protein phosphatase 1, regulatory (inhibitor) subunit 12B	protein-coding
MACS_peak_12501	chr2	50940579	50941039	+	Intergenic	Intergenic	63822	NM_028810	74194	Mm.46497	NM_028810	ENSMUSG00000017144	Rnd3	2610017M01Rik|AI661404|Arhe|Rhoe	Rho family GTPase 3	protein-coding
MACS_peak_12505	chr2	51893275	51893784	+	promoter-TSS (NM_009398)	promoter-TSS (NM_009398)	-104	NM_009398	21930	Mm.3509	NM_009398	ENSMUSG00000053475	Tnfaip6	TSG-6|Tnfip6|Tsg6	tumor necrosis factor alpha induced protein 6	protein-coding
MACS_peak_12506	chr2	51926653	51928266	+	promoter-TSS (NM_175238)	promoter-TSS (NM_175238)	-898	NM_175238	51869	Mm.254530	NM_175238	ENSMUSG00000036202	Rif1	5730435J01Rik|6530403D07Rik|AU016181|AW549474|D2Ertd145e	Rap1 interacting factor 1 homolog (yeast)	protein-coding
MACS_peak_12507	chr2	51928901	51929331	+	intron (NM_175238, intron 2 of 35)	CpG-8105	759	NM_175238	51869	Mm.254530	NM_175238	ENSMUSG00000036202	Rif1	5730435J01Rik|6530403D07Rik|AU016181|AW549474|D2Ertd145e	Rap1 interacting factor 1 homolog (yeast)	protein-coding
MACS_peak_12508	chr2	51930624	51931215	+	intron (NM_175238, intron 3 of 35)	ID_B1|SINE|B4	2562	NM_175238	51869	Mm.254530	NM_175238	ENSMUSG00000036202	Rif1	5730435J01Rik|6530403D07Rik|AU016181|AW549474|D2Ertd145e	Rap1 interacting factor 1 homolog (yeast)	protein-coding
MACS_peak_12509	chr2	51942786	51943228	+	intron (NM_175238, intron 10 of 35)	intron (NM_175238, intron 10 of 35)	14650	NM_175238	51869	Mm.254530	NM_175238	ENSMUSG00000036202	Rif1	5730435J01Rik|6530403D07Rik|AU016181|AW549474|D2Ertd145e	Rap1 interacting factor 1 homolog (yeast)	protein-coding
MACS_peak_1251	chr1	137082372	137083163	+	Intergenic	Intergenic	-18509	NM_134438	171469	Mm.272290	NM_134438	ENSMUSG00000026424	Gpr37l1	AW047233|CAG-18|D0Kist8	G protein-coupled receptor 37-like 1	protein-coding
MACS_peak_12510	chr2	51945415	51946011	+	exon (NM_175238, exon 13 of 36)	exon (NM_175238, exon 13 of 36)	17356	NM_175238	51869	Mm.254530	NM_175238	ENSMUSG00000036202	Rif1	5730435J01Rik|6530403D07Rik|AU016181|AW549474|D2Ertd145e	Rap1 interacting factor 1 homolog (yeast)	protein-coding
MACS_peak_12514	chr2	52413033	52413434	+	intron (NM_001285427, intron 1 of 13)	intron (NM_001285427, intron 1 of 13)	898	NM_146123	12298	Mm.330223	NM_146123	ENSMUSG00000017412	Cacnb4	3110038O15Rik|Cchb4|lh	calcium channel, voltage-dependent, beta 4 subunit	protein-coding
MACS_peak_12519	chr2	55062316	55063008	+	Intergenic	RLTR28B|LTR|ERVL	-226905	NM_008426	16519	Mm.5127	NM_008426	ENSMUSG00000026824	Kcnj3	GIRK1|Kcnf3|Kir3.1	potassium inwardly-rectifying channel, subfamily J, member 3	protein-coding
MACS_peak_12526	chr2	56761397	56761848	+	Intergenic	Lx2A1|LINE|L1	123400	NR_105751	102465169		NR_105751	miRBase:MI0021861	Mir195b	mmu-mir-195b	microRNA mir-195b	ncRNA
MACS_peak_12527	chr2	57082276	57082734	+	Intergenic	Intergenic	-7584	NM_001145820	14571	Mm.3711	NM_010274	ENSMUSG00000026827	Gpd2	AA408484|AI448216|AU021455|AW494132|GPDH|Gdm1|Gpd-m|Gpdh-m|TISP38	glycerol phosphate dehydrogenase 2, mitochondrial	protein-coding
MACS_peak_12530	chr2	57185839	57186396	+	intron (NM_010274, intron 6 of 16)	intron (NM_010274, intron 6 of 16)	95324	NM_010274	14571	Mm.3711	NM_010274	ENSMUSG00000026827	Gpd2	AA408484|AI448216|AU021455|AW494132|GPDH|Gdm1|Gpd-m|Gpdh-m|TISP38	glycerol phosphate dehydrogenase 2, mitochondrial	protein-coding
MACS_peak_12532	chr2	57680539	57681221	+	Intergenic	Intergenic	-169686	NM_172855	241391	Mm.484118	NM_172855	ENSMUSG00000026828	Galnt5	4832424J23	UDP-N-acetyl-alpha-D-galactosamine:polypeptide N-acetylgalactosaminyltransferase 5	protein-coding
MACS_peak_12535	chr2	58457077	58457591	+	intron (NM_001289660, intron 1 of 7)	intron (NM_001289660, intron 1 of 7)	37589	NM_001289660	76654	Mm.200370	NM_029692	ENSMUSG00000026839	Upp2	1700124F02Rik|AI266885|UDRPASE2|UP2|UPASE2	uridine phosphorylase 2	protein-coding
MACS_peak_12536	chr2	58477224	58478084	+	intron (NM_001289660, intron 1 of 7)	RLTR1B|LTR|ERV1	57909	NM_001289660	76654	Mm.200370	NM_029692	ENSMUSG00000026839	Upp2	1700124F02Rik|AI266885|UDRPASE2|UP2|UPASE2	uridine phosphorylase 2	protein-coding
MACS_peak_12537	chr2	58478114	58478610	+	intron (NM_001289660, intron 1 of 7)	RLTR41|LTR|ERV1	58617	NM_001289660	76654	Mm.200370	NM_029692	ENSMUSG00000026839	Upp2	1700124F02Rik|AI266885|UDRPASE2|UP2|UPASE2	uridine phosphorylase 2	protein-coding
MACS_peak_12538	chr2	58478619	58479204	+	intron (NM_001289660, intron 1 of 7)	intron (NM_001289660, intron 1 of 7)	59166	NM_001289660	76654	Mm.200370	NM_029692	ENSMUSG00000026839	Upp2	1700124F02Rik|AI266885|UDRPASE2|UP2|UPASE2	uridine phosphorylase 2	protein-coding
MACS_peak_12542	chr2	59069382	59069981	+	intron (NM_175464, intron 2 of 20)	RLTR9E|LTR|ERVK	70774	NM_175464	227937	Mm.260938	NM_026361	ENSMUSG00000026991	Pkp4	5031422I09Rik|9430019K17Rik|Armrp|p0071	plakophilin 4	protein-coding
MACS_peak_12544	chr2	59223364	59224117	+	intron (NR_040510, intron 1 of 2)	intron (NR_040510, intron 1 of 2)	999	NR_040510	76676	Mm.110038	NR_040510	ENSMUSG00000087455	5330411J11Rik	-	RIKEN cDNA 5330411J11 gene	ncRNA
MACS_peak_12547	chr2	59379483	59380044	+	Intergenic	Intergenic	57053	NM_029723	76747	Mm.275769	NM_029723	ENSMUSG00000026989	Dapl1	2310032F03Rik|EEDA	death associated protein-like 1	protein-coding
MACS_peak_12548	chr2	59460352	59461110	+	intron (NM_198294, intron 1 of 26)	intron (NM_198294, intron 1 of 26)	10632	NM_198294	66860	Mm.27917	NM_198294	ENSMUSG00000035168	Tanc1	1200003E16Rik|Tanc|mKIAA1728	tetratricopeptide repeat, ankyrin repeat and coiled-coil containing 1	protein-coding
MACS_peak_12549	chr2	59463347	59463836	+	intron (NM_198294, intron 1 of 26)	B2_Mm2|SINE|B2	13492	NM_198294	66860	Mm.27917	NM_198294	ENSMUSG00000035168	Tanc1	1200003E16Rik|Tanc|mKIAA1728	tetratricopeptide repeat, ankyrin repeat and coiled-coil containing 1	protein-coding
MACS_peak_1255	chr1	137155502	137156208	+	promoter-TSS (NM_001163131)	promoter-TSS (NM_001163131)	-806	NM_007921	13710	Mm.441439	NM_007921	ENSMUSG00000003051	Elf3	ESE-1|ESX|jen	E74-like factor 3	protein-coding
MACS_peak_12553	chr2	59973849	59974352	+	Intergenic	ORR1C2|LTR|MaLR	-10303	NM_001001182	407823	Mm.228071	NM_001001182	ENSMUSG00000026987	Baz2b	5830435C13Rik|BC053917|D2Ertd794e	bromodomain adjacent to zinc finger domain, 2B	protein-coding
MACS_peak_12554	chr2	60033750	60034069	+	Intergenic	PB1D10|SINE|Alu	-14084	NM_020575	57438	Mm.260635	NM_020575	ENSMUSG00000026977	2015-03-07	Axo|Axot|Gtrgeo17	membrane-associated ring finger (C3HC4) 7	protein-coding
MACS_peak_12555	chr2	60034857	60035490	+	Intergenic	B1F|SINE|Alu	-12820	NM_020575	57438	Mm.260635	NM_020575	ENSMUSG00000026977	2015-03-07	Axo|Axot|Gtrgeo17	membrane-associated ring finger (C3HC4) 7	protein-coding
MACS_peak_12558	chr2	60222635	60224164	+	Intergenic	Lx7|LINE|L1	-2111	NM_013825	17076	Mm.2074	NM_013825	ENSMUSG00000026980	Ly75	CD205|DEC-205|DEC205	lymphocyte antigen 75	protein-coding
MACS_peak_12560	chr2	60568044	60568463	+	Intergenic	Intergenic	-7593	NM_001159564	16420	Mm.98193	NM_021359	ENSMUSG00000026971	Itgb6	2210409C20Rik|4831415H04Rik	integrin beta 6	protein-coding
MACS_peak_12561	chr2	61512514	61513052	+	Intergenic	ORR1D1|LTR|MaLR	-36968	NM_021526	59029	Mm.218198	NM_021526	ENSMUSG00000026914	Psmd14	2610312C03Rik|3200001M20Rik|AA986732|Pad1|Poh1|rpm11	proteasome (prosome, macropain) 26S subunit, non-ATPase, 14	protein-coding
MACS_peak_12565	chr2	62246152	62246695	+	intron (NM_001159543, intron 2 of 24)	B1_Mus2|SINE|Alu	3865	NM_010074	13482	Mm.1151	NM_010074	ENSMUSG00000035000	Dpp4	Cd26|Dpp-4|THAM	dipeptidylpeptidase 4	protein-coding
MACS_peak_12566	chr2	62475977	62476465	+	intron (NM_027835, intron 2 of 15)	RLTR13B1|LTR|ERVK	8091	NM_027835	71586	Mm.136224	NM_027835	ENSMUSG00000026896	Ifih1	9130009C22Rik|Helicard|Hlcd|MDA5|RLR-2	interferon induced with helicase C domain 1	protein-coding
MACS_peak_12571	chr2	63729757	63730175	+	Intergenic	Intergenic	206129	NM_001267846	60344	Mm.130769	NM_021716	ENSMUSG00000075324	Fign	fi|fidget	fidgetin	protein-coding
MACS_peak_12573	chr2	63765778	63766274	+	Intergenic	Intergenic	170069	NM_001267846	60344	Mm.130769	NM_021716	ENSMUSG00000075324	Fign	fi|fidget	fidgetin	protein-coding
MACS_peak_12576	chr2	64875498	64876096	+	Intergenic	Intergenic	-14974	NM_016719	50915	Mm.214554	NM_016719	ENSMUSG00000026888	Grb14	AI505286	growth factor receptor bound protein 14	protein-coding
MACS_peak_12577	chr2	65251822	65252284	+	Intergenic	Intergenic	-49596	NR_105755	102466151		NR_105755	miRBase:MI0021865	Mir6337	mmu-mir-6337	microRNA mir-6337	ncRNA
MACS_peak_12578	chr2	65259141	65259828	+	Intergenic	Intergenic	-57027	NR_105755	102466151		NR_105755	miRBase:MI0021865	Mir6337	mmu-mir-6337	microRNA mir-6337	ncRNA
MACS_peak_1258	chr1	137404317	137404882	+	intron (NM_173437, intron 3 of 28)	intron (NM_173437, intron 3 of 28)	-53339	NR_049188	100885827		NR_049188		Mir1231	mmu-mir-1231	microRNA mir-1231	ncRNA
MACS_peak_12581	chr2	65679449	65680153	+	Intergenic	RMER10B|LTR|ERVL	-4023	NM_001290666	77771	Mm.102025	NM_153409	ENSMUSG00000044647	Csrnp3	A330102K23Rik|CSRNP-3|Csnrp3|Mbu1|taip-2	cysteine-serine-rich nuclear protein 3	protein-coding
MACS_peak_12582	chr2	65686637	65687187	+	intron (NM_001290666, intron 1 of 4)	intron (NM_001290666, intron 1 of 4)	3088	NM_178634	77771	Mm.102025	NM_153409	ENSMUSG00000044647	Csrnp3	A330102K23Rik|CSRNP-3|Csnrp3|Mbu1|taip-2	cysteine-serine-rich nuclear protein 3	protein-coding
MACS_peak_12584	chr2	66278175	66278772	+	promoter-TSS (NR_033495)	promoter-TSS (NR_033495)	421	NM_018733	20265	Mm.439704	NM_018733	ENSMUSG00000064329	Scn1a	B230332M13|Nav1.1	sodium channel, voltage-gated, type I, alpha	protein-coding
MACS_peak_12590	chr2	67428524	67428834	+	Intergenic	L1M2|LINE|L1	-84835	NR_106083	102465706		NR_106083	miRBase:MI0023719	Mir7224	mmu-mir-7224	microRNA mir-7224	ncRNA
MACS_peak_12595	chr2	68656952	68657724	+	Intergenic	Intergenic	-42276	NM_172856	241447	Mm.222222	NM_172856	ENSMUSG00000027035	Cers6	4732462C07Rik|AW544719|Lass6|T1L	ceramide synthase 6	protein-coding
MACS_peak_12597	chr2	68726693	68727262	+	intron (NM_172856, intron 1 of 9)	L1MEf|LINE|L1	27363	NM_172856	241447	Mm.222222	NM_172856	ENSMUSG00000027035	Cers6	4732462C07Rik|AW544719|Lass6|T1L	ceramide synthase 6	protein-coding
MACS_peak_12598	chr2	68763507	68763988	+	intron (NM_172856, intron 1 of 9)	intron (NM_172856, intron 1 of 9)	64133	NM_172856	241447	Mm.222222	NM_172856	ENSMUSG00000027035	Cers6	4732462C07Rik|AW544719|Lass6|T1L	ceramide synthase 6	protein-coding
MACS_peak_12599	chr2	68885673	68886552	+	intron (NM_172856, intron 5 of 9)	intron (NM_172856, intron 5 of 9)	-87745	NM_181547	329416	Mm.90047	NM_181547	ENSMUSG00000034738	Nostrin	Daip2|mDaIP2	nitric oxide synthase trafficker	protein-coding
MACS_peak_126	chr1	12800428	12800891	+	intron (NM_001198566, intron 6 of 20)	intron (NM_001198566, intron 6 of 20)	92033	NM_172294	240725	Mm.45563	NM_172294	ENSMUSG00000016918	Sulf1	AI467640|AW121680|mKIAA1077	sulfatase 1	protein-coding
MACS_peak_12600	chr2	69059946	69060621	+	intron (NM_001289857, intron 2 of 3)	intron (NM_001289857, intron 2 of 3)	2277	NM_001289857	14378	Mm.140768	NM_021331	ENSMUSG00000005232	G6pc2	G6pc-rs|IGRP	glucose-6-phosphatase, catalytic, 2	protein-coding
MACS_peak_12601	chr2	69138655	69139215	+	intron (NM_021022, intron 8 of 27)	RLTR13B1|LTR|ERVK	41738	NM_021022	27413	Mm.439855	NM_021022	ENSMUSG00000027048	Abcb11	ABC16|Bsep|Lith1|PFIC2|PGY4|SPGP	ATP-binding cassette, sub-family B (MDR/TAP), member 11	protein-coding
MACS_peak_12603	chr2	69382171	69382558	+	intron (NM_001081088, intron 4 of 78)	intron (NM_001081088, intron 4 of 78)	41760	NM_001081088	14725	Mm.23847	NM_001081088	ENSMUSG00000027070	Lrp2	AI315343|AW536255|D230004K18Rik|Gp330|Megalin|b2b1625.2Clo	low density lipoprotein receptor-related protein 2	protein-coding
MACS_peak_12604	chr2	69393445	69393930	+	intron (NM_001081088, intron 1 of 78)	intron (NM_001081088, intron 1 of 78)	30437	NM_001081088	14725	Mm.23847	NM_001081088	ENSMUSG00000027070	Lrp2	AI315343|AW536255|D230004K18Rik|Gp330|Megalin|b2b1625.2Clo	low density lipoprotein receptor-related protein 2	protein-coding
MACS_peak_12609	chr2	69965582	69966182	+	intron (NM_177376, intron 8 of 34)	intron (NM_177376, intron 8 of 34)	88699	NM_177376	329421	Mm.99648	NM_177376	ENSMUSG00000042064	Myo3b	A430065P19Rik	myosin IIIB	protein-coding
MACS_peak_1261	chr1	137571917	137572521	+	Intergenic	Intergenic	-53555	NM_007791	13007	Mm.196484	NM_007791	ENSMUSG00000026421	Csrp1	AA408841|AA959891|AW545626|CRP1|Csrp	cysteine and glycine-rich protein 1	protein-coding
MACS_peak_12611	chr2	70047781	70048225	+	intron (NM_177376, intron 9 of 34)	ORR1C1|LTR|MaLR	170820	NM_177376	329421	Mm.99648	NM_177376	ENSMUSG00000042064	Myo3b	A430065P19Rik	myosin IIIB	protein-coding
MACS_peak_12613	chr2	70116617	70117456	+	intron (NM_177376, intron 23 of 34)	intron (NM_177376, intron 23 of 34)	-195944	NM_022435	64406	Mm.423397	NM_022435	ENSMUSG00000075304	Sp5	-	trans-acting transcription factor 5	protein-coding
MACS_peak_12614	chr2	70457174	70457499	+	Intergenic	Intergenic	-42230	NR_027343	70231	Mm.271950	NM_027352	ENSMUSG00000014959	Gorasp2	0610011A07Rik|2410043M02Rik|5730520M13Rik|9430094F20Rik|AW552058|GOLPH2|GRASP55|GRS2|p59	golgi reassembly stacking protein 2	protein-coding
MACS_peak_12615	chr2	70458228	70458757	+	Intergenic	Intergenic	-41074	NR_027343	70231	Mm.271950	NM_027352	ENSMUSG00000014959	Gorasp2	0610011A07Rik|2410043M02Rik|5730520M13Rik|9430094F20Rik|AW552058|GOLPH2|GRASP55|GRS2|p59	golgi reassembly stacking protein 2	protein-coding
MACS_peak_12616	chr2	70499099	70499769	+	promoter-TSS (NM_027352)	promoter-TSS (NM_027352)	-132	NR_027343	70231	Mm.271950	NM_027352	ENSMUSG00000014959	Gorasp2	0610011A07Rik|2410043M02Rik|5730520M13Rik|9430094F20Rik|AW552058|GOLPH2|GRASP55|GRS2|p59	golgi reassembly stacking protein 2	protein-coding
MACS_peak_12618	chr2	70643756	70644706	+	intron (NM_172664, intron 1 of 19)	intron (NM_172664, intron 1 of 19)	19306	NM_172664	228012	Mm.136511	NM_172664	ENSMUSG00000041997	Tlk1	4930545J15Rik	tousled-like kinase 1	protein-coding
MACS_peak_12619	chr2	70668718	70669247	+	Intergenic	L1M5|LINE|L1	-5445	NM_172664	228012	Mm.136511	NM_172664	ENSMUSG00000041997	Tlk1	4930545J15Rik	tousled-like kinase 1	protein-coding
MACS_peak_12621	chr2	71005334	71005804	+	Intergenic	Intergenic	-44194	NM_001198875	13427	Mm.249479	NM_010064	ENSMUSG00000027012	Dync1i2	3110079H08Rik|AW554389|Dncic2	dynein cytoplasmic 1 intermediate chain 2	protein-coding
MACS_peak_12623	chr2	71049208	71049909	+	promoter-TSS (NM_001198878)	promoter-TSS (NM_001198878)	-205	NM_001198875	13427	Mm.249479	NM_010064	ENSMUSG00000027012	Dync1i2	3110079H08Rik|AW554389|Dncic2	dynein cytoplasmic 1 intermediate chain 2	protein-coding
MACS_peak_12624	chr2	71081129	71081725	+	intron (NM_001198872, intron 8 of 18)	intron (NM_001198872, intron 8 of 18)	31424	NM_010064	13427	Mm.249479	NM_010064	ENSMUSG00000027012	Dync1i2	3110079H08Rik|AW554389|Dncic2	dynein cytoplasmic 1 intermediate chain 2	protein-coding
MACS_peak_12625	chr2	71234389	71235104	+	intron (NM_026115, intron 2 of 10)	ORR1D1-int|LTR|MaLR	7429	NM_026115	107435	Mm.272472	NM_026115	ENSMUSG00000027018	Hat1	2410071B14Rik|AA536933|Hat-1|KAT1	histone aminotransferase 1	protein-coding
MACS_peak_12627	chr2	71322085	71322461	+	intron (NM_025633, intron 1 of 9)	intron (NM_025633, intron 1 of 9)	30878	NM_025633	66559	Mm.152796	NM_025633	ENSMUSG00000041921	Metap1d	2310066F24Rik|3110033D18Rik|AV117938|MAP 1D|Map1d|MetAP 1D|Metapl1	methionyl aminopeptidase type 1D (mitochondrial)	protein-coding
MACS_peak_12630	chr2	71493623	71494036	+	Intergenic	Intergenic	-63645	NR_037979	381371	Mm.330284	NM_201366	ENSMUSG00000064263	Gm1631	-	predicted gene 1631	ncRNA
MACS_peak_12631	chr2	71542271	71543103	+	Intergenic	Intergenic	-14787	NR_037979	381371	Mm.330284	NM_201366	ENSMUSG00000064263	Gm1631	-	predicted gene 1631	ncRNA
MACS_peak_12633	chr2	71557009	71557630	+	promoter-TSS (NR_037979)	promoter-TSS (NR_037979)	-155	NR_037979	381371	Mm.330284	NM_201366	ENSMUSG00000064263	Gm1631	-	predicted gene 1631	ncRNA
MACS_peak_12636	chr2	71642971	71643607	+	intron (NM_001277970, intron 1 of 24)	intron (NM_001277970, intron 1 of 24)	18293	NM_001277970	16403	Mm.225096	NM_008397		Itga6	5033401O05Rik|AI115430|Cd49f|VLA-6	integrin alpha 6	protein-coding
MACS_peak_12637	chr2	71704530	71705355	+	Intergenic	Intergenic	-6339	NM_172665	228026	Mm.34411	NM_172665	ENSMUSG00000006494	Pdk1	B830012B01|D530020C15Rik	pyruvate dehydrogenase kinase, isoenzyme 1	protein-coding
MACS_peak_12638	chr2	71705492	71706109	+	Intergenic	Intergenic	-5481	NM_172665	228026	Mm.34411	NM_172665	ENSMUSG00000006494	Pdk1	B830012B01|D530020C15Rik	pyruvate dehydrogenase kinase, isoenzyme 1	protein-coding
MACS_peak_1264	chr1	138131101	138131587	+	promoter-TSS (NM_028872)	promoter-TSS (NM_028872)	-487	NM_028872	67313	Mm.36763	NM_028872	ENSMUSG00000041605	5730559C18Rik	1700034M08Rik|4933426C09Rik|AI586180|D1Mgi54	RIKEN cDNA 5730559C18 gene	protein-coding
MACS_peak_12641	chr2	71856830	71857520	+	intron (NM_019688, intron 1 of 29)	RLTR11B|LTR|ERVK	-35499	NM_001204166	56508	Mm.196153	NM_019688	ENSMUSG00000049044	Rapgef4	1300003D15Rik|5730402K07Rik|6330581N18Rik|EPAC 2|Epac-2|Epac2|mKIAA4040	Rap guanine nucleotide exchange factor (GEF) 4	protein-coding
MACS_peak_12643	chr2	71932155	71932566	+	intron (NM_001204166, intron 1 of 27)	intron (NM_001204166, intron 1 of 27)	39686	NM_001204166	56508	Mm.196153	NM_019688	ENSMUSG00000049044	Rapgef4	1300003D15Rik|5730402K07Rik|6330581N18Rik|EPAC 2|Epac-2|Epac2|mKIAA4040	Rap guanine nucleotide exchange factor (GEF) 4	protein-coding
MACS_peak_12644	chr2	71945725	71946099	+	intron (NM_001204166, intron 1 of 27)	intron (NM_001204166, intron 1 of 27)	53238	NM_001204166	56508	Mm.196153	NM_019688	ENSMUSG00000049044	Rapgef4	1300003D15Rik|5730402K07Rik|6330581N18Rik|EPAC 2|Epac-2|Epac2|mKIAA4040	Rap guanine nucleotide exchange factor (GEF) 4	protein-coding
MACS_peak_12645	chr2	71975041	71975472	+	intron (NM_001204166, intron 1 of 27)	intron (NM_001204166, intron 1 of 27)	82582	NM_001204166	56508	Mm.196153	NM_019688	ENSMUSG00000049044	Rapgef4	1300003D15Rik|5730402K07Rik|6330581N18Rik|EPAC 2|Epac-2|Epac2|mKIAA4040	Rap guanine nucleotide exchange factor (GEF) 4	protein-coding
MACS_peak_1265	chr1	138323931	138324536	+	intron (NM_026500, intron 4 of 7)	intron (NM_026500, intron 4 of 7)	-12137	NR_024328	320054	Mm.208000	NR_024328	ENSMUSG00000097403	9230116N13Rik	-	RIKEN cDNA 9230116N13 gene	ncRNA
MACS_peak_12651	chr2	72782835	72783156	+	intron (NM_001098425, intron 3 of 4)	B1_Mus2|SINE|Alu	34343	NM_001098425	20687	Mm.124328	NM_011450	ENSMUSG00000027109	Sp3	D130027J01Rik	trans-acting transcription factor 3	protein-coding
MACS_peak_12652	chr2	72794454	72794835	+	intron (NM_001098425, intron 2 of 4)	B2_Mm2|SINE|B2	22694	NM_001098425	20687	Mm.124328	NM_011450	ENSMUSG00000027109	Sp3	D130027J01Rik	trans-acting transcription factor 3	protein-coding
MACS_peak_12655	chr2	72859156	72859921	+	Intergenic	B2_Mm1t|SINE|B2	-41035	NM_001018042	20687	Mm.124328	NM_011450	ENSMUSG00000027109	Sp3	D130027J01Rik	trans-acting transcription factor 3	protein-coding
MACS_peak_12656	chr2	72879393	72880138	+	Intergenic	Intergenic	-61262	NM_001018042	20687	Mm.124328	NM_011450	ENSMUSG00000027109	Sp3	D130027J01Rik	trans-acting transcription factor 3	protein-coding
MACS_peak_12659	chr2	73086642	73087315	+	Intergenic	Intergenic	-23005	NM_001005343	381373	Mm.330293	NM_001005343		Sp9	-	trans-acting transcription factor 9	protein-coding
MACS_peak_12660	chr2	73114114	73114839	+	TTS (NM_001005343)	TTS (NM_001005343)	4493	NM_001005343	381373	Mm.330293	NM_001005343		Sp9	-	trans-acting transcription factor 9	protein-coding
MACS_peak_12661	chr2	73167810	73168261	+	intron (NM_029022, intron 6 of 7)	intron (NM_029022, intron 6 of 7)	17326	NM_029022	74616	Mm.247457	NM_029022	ENSMUSG00000008226	Scrn3	4833415E20Rik|AI427019|AV002033|Ses3	secernin 3	protein-coding
MACS_peak_12665	chr2	73664803	73665331	+	3' UTR (NM_001284371, exon 12 of 12)	3' UTR (NM_001284371, exon 12 of 12)	-51664	NM_001113246	108699	Mm.257073	NM_029716	ENSMUSG00000056486	Chn1	0610007I19Rik|0710001E19Rik|1700112L09Rik|2900046J01Rik|AI413815|ARHGAP2	chimerin 1	protein-coding
MACS_peak_12666	chr2	73698084	73698704	+	intron (NM_001284370, intron 5 of 12)	intron (NM_001284370, intron 5 of 12)	32302	NM_001284371	11909	Mm.209903	NM_009715	ENSMUSG00000027104	Atf2	Atf-2|CRE-BP|Creb2|D130078H02Rik|D18875|Tg(Gzma-Klra1)7Wum|mXBP	activating transcription factor 2	protein-coding
MACS_peak_12667	chr2	73961498	73961937	+	Intergenic	Intergenic	184057	NR_040501	73962	Mm.50289	NR_040501	ENSMUSG00000085405	4930441J16Rik	-	RIKEN cDNA 4930441J16 gene	ncRNA
MACS_peak_1267	chr1	138464077	138464567	+	Intergenic	URR1A|DNA|MER1_type	-57156	NM_177643	226442	Mm.62521	NM_177643	ENSMUSG00000041483	Zfp281	Znf281	zinc finger protein 281	protein-coding
MACS_peak_12672	chr2	74502687	74503110	+	Intergenic	Intergenic	-3469	NM_008275	15433	Mm.57227	NM_008275	ENSMUSG00000001819	Hoxd13	Hox-4.8|spdh	homeobox D13	protein-coding
MACS_peak_12676	chr2	74731218	74731894	+	Intergenic	Intergenic	67687	NM_016804	53375	Mm.292613	NM_016804		Mtx2	1500012G02Rik	metaxin 2	protein-coding
MACS_peak_12678	chr2	74956514	74957279	+	Intergenic	Intergenic	293027	NM_016804	53375	Mm.292613	NM_016804		Mtx2	1500012G02Rik	metaxin 2	protein-coding
MACS_peak_1268	chr1	138465455	138466443	+	Intergenic	Intergenic	-55529	NM_177643	226442	Mm.62521	NM_177643	ENSMUSG00000041483	Zfp281	Znf281	zinc finger protein 281	protein-coding
MACS_peak_12681	chr2	75472333	75473051	+	Intergenic	RLTR1B|LTR|ERV1	-24624	NM_146130	229279	Mm.316306	NM_053263	ENSMUSG00000059005	Hnrnpa3	2410013L13Rik|2610209F03Rik|2610510D13Rik|Hnrpa3	heterogeneous nuclear ribonucleoprotein A3	protein-coding
MACS_peak_12683	chr2	75508971	75509910	+	Intergenic	B2_Mm1t|SINE|B2	12093	NR_033513	627828	Mm.459502	NR_033513	ENSMUSG00000092086	Gm6793	EG627828	heterogeneous nuclear ribonucleoprotein A3 pseudogene	pseudo
MACS_peak_12685	chr2	75606148	75606805	+	Intergenic	Intergenic	-63758	NM_172666	228061	Mm.31227	NM_172666	ENSMUSG00000042410	Agps	5832437L22|9930035G10Rik|AW123847|Adaps|Adas|Adhaps|Adps|Aldhpsy|bs2	alkylglycerone phosphate synthase	protein-coding
MACS_peak_1269	chr1	138466470	138467967	+	Intergenic	Intergenic	-54260	NM_177643	226442	Mm.62521	NM_177643	ENSMUSG00000041483	Zfp281	Znf281	zinc finger protein 281	protein-coding
MACS_peak_12690	chr2	75711606	75712625	+	intron (NM_172666, intron 10 of 19)	RMER1B|Other|Other	41881	NM_172666	228061	Mm.31227	NM_172666	ENSMUSG00000042410	Agps	5832437L22|9930035G10Rik|AW123847|Adaps|Adas|Adhaps|Adps|Aldhpsy|bs2	alkylglycerone phosphate synthase	protein-coding
MACS_peak_12694	chr2	76092859	76093341	+	intron (NM_001081033, intron 2 of 19)	intron (NM_001081033, intron 2 of 19)	83610	NM_001081033	241489	Mm.246613	NM_001081033		Pde11a	6330414F14Rik|A630086N24Rik|Gm350|PDE11A1	phosphodiesterase 11A	protein-coding
MACS_peak_12695	chr2	76238064	76238737	+	Intergenic	RLTR17|LTR|ERVK	-6165	NM_145525	99031	Mm.240435	NM_145525	ENSMUSG00000042359	Osbpl6	1110062M20Rik|AI596402|ORP-6|mKIAA4128	oxysterol binding protein-like 6	protein-coding
MACS_peak_12696	chr2	76279942	76280518	+	intron (NM_001290734, intron 1 of 24)	intron (NM_001290734, intron 1 of 24)	35665	NM_001290733	99031	Mm.240435	NM_145525	ENSMUSG00000042359	Osbpl6	1110062M20Rik|AI596402|ORP-6|mKIAA4128	oxysterol binding protein-like 6	protein-coding
MACS_peak_12698	chr2	76514520	76515037	+	intron (NM_031256, intron 1 of 7)	intron (NM_031256, intron 1 of 7)	1406	NM_031256	83435	Mm.41636	NM_031256	ENSMUSG00000002733	Plekha3	FAPP1	pleckstrin homology domain-containing, family A (phosphoinositide binding specific) member 3	protein-coding
MACS_peak_12699	chr2	76643116	76644049	+	intron (NM_011652, intron 189 of 312)	intron (NM_011652, intron 189 of 312)	130210	NM_031256	83435	Mm.41636	NM_031256	ENSMUSG00000002733	Plekha3	FAPP1	pleckstrin homology domain-containing, family A (phosphoinositide binding specific) member 3	protein-coding
MACS_peak_12700	chr2	76655789	76656235	+	intron (NM_011652, intron 168 of 312)	intron (NM_011652, intron 168 of 312)	142640	NM_031256	83435	Mm.41636	NM_031256	ENSMUSG00000002733	Plekha3	FAPP1	pleckstrin homology domain-containing, family A (phosphoinositide binding specific) member 3	protein-coding
MACS_peak_12702	chr2	76953937	76954310	+	intron (NM_001025576, intron 5 of 23)	intron (NM_001025576, intron 5 of 23)	54569	NM_001025576	545428	Mm.26579	NM_001025576	ENSMUSG00000044033	Ccdc141	2610301F02Rik|CAMDI|ENSMUSG00000075261	coiled-coil domain containing 141	protein-coding
MACS_peak_12703	chr2	76984897	76985802	+	intron (NM_001025576, intron 2 of 23)	BGLII|LTR|ERVK	23343	NM_001025576	545428	Mm.26579	NM_001025576	ENSMUSG00000044033	Ccdc141	2610301F02Rik|CAMDI|ENSMUSG00000075261	coiled-coil domain containing 141	protein-coding
MACS_peak_12704	chr2	77171393	77172025	+	Intergenic	Intergenic	-53060	NM_175465	228071	Mm.27120	NM_175465	ENSMUSG00000042272	Sestd1	1500031J16Rik|A930010O20|Solo/Trio8	SEC14 and spectrin domains 1	protein-coding
MACS_peak_12705	chr2	77175747	77176620	+	Intergenic	RLTR25A|LTR|ERVK	-57534	NM_175465	228071	Mm.27120	NM_175465	ENSMUSG00000042272	Sestd1	1500031J16Rik|A930010O20|Solo/Trio8	SEC14 and spectrin domains 1	protein-coding
MACS_peak_12707	chr2	77424528	77425238	+	intron (NM_178723, intron 3 of 9)	Lx3C|LINE|L1	-67160	NM_001113400	241494	Mm.490320	NM_178723	ENSMUSG00000027016	Zfp385b	B830010L13Rik|C130013B13Rik|Zfp533|Znf385b	zinc finger protein 385B	protein-coding
MACS_peak_12709	chr2	77590477	77591002	+	intron (NM_178723, intron 1 of 9)	intron (NM_178723, intron 1 of 9)	-49410	NM_001113399	241494	Mm.490320	NM_178723	ENSMUSG00000027016	Zfp385b	B830010L13Rik|C130013B13Rik|Zfp533|Znf385b	zinc finger protein 385B	protein-coding
MACS_peak_12710	chr2	77883311	77883892	+	Intergenic	Intergenic	-5633	NR_108098	78158	Mm.78473	NR_108098	ENSMUSG00000085431	4930440I19Rik	-	RIKEN cDNA 4930440I19 gene	ncRNA
MACS_peak_12715	chr2	79269762	79270242	+	promoter-TSS (NM_001048176)	promoter-TSS (NM_001048176)	-857	NM_001048176	228094	Mm.440704	NM_001033295	ENSMUSG00000075256	Cerkl	Gm1958|Rp26	ceramide kinase-like	protein-coding
MACS_peak_12716	chr2	79406775	79407177	+	Intergenic	Intergenic	-68606	NM_080558	70599	Mm.272881	NM_080558	ENSMUSG00000027007	Ssfa2	5730488C15Rik|CS-1|CS1|KRAP|SPAG13|mKIAA1927	sperm specific antigen 2	protein-coding
MACS_peak_12717	chr2	79407366	79407977	+	Intergenic	Intergenic	-67911	NM_080558	70599	Mm.272881	NM_080558	ENSMUSG00000027007	Ssfa2	5730488C15Rik|CS-1|CS1|KRAP|SPAG13|mKIAA1927	sperm specific antigen 2	protein-coding
MACS_peak_12718	chr2	79966610	79967386	+	intron (NM_016744, intron 1 of 14)	intron (NM_016744, intron 1 of 14)	2130	NM_016744	18573	Mm.40678	NM_016744	ENSMUSG00000059173	Pde1a	AI987702|AW125737	phosphodiesterase 1A, calmodulin-dependent	protein-coding
MACS_peak_1272	chr1	138527318	138527624	+	TTS (NM_001160251)	TTS (NM_001160251)	5993	NM_001160251	226442	Mm.62521	NM_177643	ENSMUSG00000041483	Zfp281	Znf281	zinc finger protein 281	protein-coding
MACS_peak_12729	chr2	81688855	81689555	+	Intergenic	Lx9|LINE|L1	-204610	NM_175513	241514	Mm.119383	NM_175513	ENSMUSG00000070866	Zfp804a	C630007C17Rik|Znf804a	zinc finger protein 804A	protein-coding
MACS_peak_12731	chr2	81909255	81909631	+	intron (NM_175513, intron 1 of 3)	intron (NM_175513, intron 1 of 3)	15628	NM_175513	241514	Mm.119383	NM_175513	ENSMUSG00000070866	Zfp804a	C630007C17Rik|Znf804a	zinc finger protein 804A	protein-coding
MACS_peak_12747	chr2	84086032	84086472	+	Intergenic	Intergenic	179171	NM_018782	54598	Mm.75467	NM_018782	ENSMUSG00000059588	Calcrl	AV071593|CRLR	calcitonin receptor-like	protein-coding
MACS_peak_12748	chr2	84321886	84322334	+	Intergenic	RLTR18|LTR|ERVK	-5178	NM_001177320	21788	Mm.124316	NM_011576	ENSMUSG00000027082	Tfpi	A630013F22Rik|AW552122|EPI|LACI	tissue factor pathway inhibitor	protein-coding
MACS_peak_12750	chr2	84358863	84359471	+	Intergenic	Intergenic	-12137	NR_046046	672763	Mm.491046	NR_046046	ENSMUSG00000087362	Gm13710	OTTMUSG00000013441	predicted gene 13710	ncRNA
MACS_peak_12753	chr2	84419445	84420093	+	Intergenic	Intergenic	70898	NM_001085453	12388	Mm.35738	NM_007615	ENSMUSG00000034101	Ctnnd1	AA409437|AU019353|Catns|Ctnnd|P120|mKIAA0384	catenin (cadherin associated protein), delta 1	protein-coding
MACS_peak_12755	chr2	84474037	84474446	+	intron (NM_007615, intron 1 of 19)	intron (NM_007615, intron 1 of 19)	16426	NM_001085453	12388	Mm.35738	NM_007615	ENSMUSG00000034101	Ctnnd1	AA409437|AU019353|Catns|Ctnnd|P120|mKIAA0384	catenin (cadherin associated protein), delta 1	protein-coding
MACS_peak_1276	chr1	138592331	138593381	+	promoter-TSS (NR_037986)	promoter-TSS (NR_037986)	68	NR_037986	100503474	Mm.428276	NR_037986		Gm16880	-	predicted gene, 16880	ncRNA
MACS_peak_12762	chr2	84677100	84677873	+	Intergenic	Intergenic	-2079	NM_001081349	72401	Mm.22716	NM_024497	ENSMUSG00000027075	Slc43a1	2610016F07Rik|AA986141|Lat3|PB39|Pov1|R00504	solute carrier family 43, member 1	protein-coding
MACS_peak_12768	chr2	85857808	85858353	+	Intergenic	L1Md_F2|LINE|L1	-2717	NM_146578	258571	Mm.223099	NM_146578	ENSMUSG00000045392	Olfr1033	MOR199-2	olfactory receptor 1033	protein-coding
MACS_peak_12774	chr2	86282089	86282819	+	Intergenic	RLTR13D1|LTR|ERVK	3707	NM_146408	258403	Mm.357297	NM_146408	ENSMUSG00000075182	Olfr1065	MOR190-1	olfactory receptor 1065	protein-coding
MACS_peak_12776	chr2	87007681	87008439	+	Intergenic	LTRIS2|LTR|ERV1	-17244	NM_146593	258586	Mm.223113	NM_146593	ENSMUSG00000075158	Olfr1111	MOR181-2	olfactory receptor 1111	protein-coding
MACS_peak_12777	chr2	87233322	87233873	+	Intergenic	BGLII|LTR|ERVK	5733	NM_147031	259033	Mm.377798	NM_147031	ENSMUSG00000047594	Olfr1122	MOR264-1	olfactory receptor 1122	protein-coding
MACS_peak_12779	chr2	87355067	87355629	+	Intergenic	B3|SINE|B2	6733	NM_178249	347711	Mm.21815	NM_178249	ENSMUSG00000025838	Pramel6	C80453|C80515	preferentially expressed antigen in melanoma like 6	protein-coding
MACS_peak_12780	chr2	87355683	87356491	+	Intergenic	Intergenic	7472	NM_178249	347711	Mm.21815	NM_178249	ENSMUSG00000025838	Pramel6	C80453|C80515	preferentially expressed antigen in melanoma like 6	protein-coding
MACS_peak_12795	chr2	89005378	89006039	+	Intergenic	MMERVK10C-int|LTR|ERVK	5694	NM_146891	258893	Mm.377737	NM_146891	ENSMUSG00000075098	Olfr1225	MOR233-11	olfactory receptor 1225	protein-coding
MACS_peak_12798	chr2	89402870	89403473	+	Intergenic	ETnERV2-int|LTR|ERVK	12759	NM_146788	258784	Mm.377688	NM_146788	ENSMUSG00000075083	Olfr1245	MOR23112	olfactory receptor 1245	protein-coding
MACS_peak_128	chr1	12876568	12877128	+	intron (NM_172841, intron 5 of 8)	intron (NM_172841, intron 5 of 8)	104368	NM_172841	240726	Mm.24481	NM_172841	ENSMUSG00000025938	Slco5a1	4732454B15|A630033C23Rik|AA407151	solute carrier organic anion transporter family, member 5A1	protein-coding
MACS_peak_12817	chr2	90662988	90663559	+	Intergenic	ORR1D1|LTR|MaLR	-24039	NM_019758	56428	Mm.28023	NM_019758	ENSMUSG00000027282	Mtch2	2310034D24Rik|4930539J07Rik|HSPC032	mitochondrial carrier homolog 2 (C. elegans)	protein-coding
MACS_peak_12819	chr2	90773086	90773655	+	Intergenic	RLTR13D5|LTR|ERVK	-7184	NM_198683	13046	Mm.29495	NM_017368	ENSMUSG00000005506	Celf1	1600010O03Rik|AA407467|Brunol2|CUG-BP|CUG-BP1|CUGBP|Cugbp1|D2Wsu101e|HNAB50|NAB50	CUGBP, Elav-like family member 1	protein-coding
MACS_peak_12822	chr2	91042645	91043149	+	promoter-TSS (NM_007387)	promoter-TSS (NM_007387)	-172	NM_007387	11432	Mm.45570	NM_007387	ENSMUSG00000002103	Acp2	Acp-2|LAP	acid phosphatase 2, lysosomal	protein-coding
MACS_peak_12824	chr2	91077340	91078079	+	promoter-TSS (NM_028119)	promoter-TSS (NM_028119)	406	NR_015464	606735	Mm.246808	NR_015464	ENSMUSG00000097868	A330069E16Rik	-	RIKEN cDNA A330069E16 gene	ncRNA
MACS_peak_12826	chr2	91270332	91270801	+	intron (NM_175123, intron 1 of 8)	intron (NM_175123, intron 1 of 8)	14233	NM_175123	228356	Mm.386861	NM_175123	ENSMUSG00000040591	1110051M20Rik	AI586322	RIKEN cDNA 1110051M20 gene	protein-coding
MACS_peak_12828	chr2	91408201	91408858	+	intron (NM_029437, intron 13 of 42)	B1_Mus1|SINE|Alu	22050	NM_029437	75786	Mm.168478	NM_029437	ENSMUSG00000040549	Ckap5	3110043H24Rik|4930432B04Rik|D730027C18Rik|T25636|mKIAA0097	cytoskeleton associated protein 5	protein-coding
MACS_peak_12831	chr2	91507771	91508254	+	intron (NR_027371, intron 5 of 13)	intron (NR_027371, intron 5 of 13)	14647	NM_146124	228359	Mm.22413	NM_146124	ENSMUSG00000027247	Arhgap1	B230365D05Rik|C76222|Cdc42GAP|p50rhoGAP	Rho GTPase activating protein 1	protein-coding
MACS_peak_12833	chr2	91569871	91570405	+	promoter-TSS (NM_001080754)	promoter-TSS (NM_001080754)	-157	NM_172669	228361	Mm.436667	NM_172669	ENSMUSG00000040506	Ambra1	2310079H06Rik|A130023A14|AA474864|AV021921|D030051N19Rik|mKIAA1736	autophagy/beclin 1 regulator 1	protein-coding
MACS_peak_12834	chr2	91574157	91574833	+	intron (NM_172669, intron 1 of 17)	B1_Mus1|SINE|Alu	4200	NM_001080754	228361	Mm.436667	NM_172669	ENSMUSG00000040506	Ambra1	2310079H06Rik|A130023A14|AA474864|AV021921|D030051N19Rik|mKIAA1736	autophagy/beclin 1 regulator 1	protein-coding
MACS_peak_12835	chr2	91984144	91984710	+	Intergenic	L1ME2|LINE|L1	-39912	NM_138755	192285	Mm.330408	NM_138755	ENSMUSG00000058318	Phf21a	80kDa|Bhc|Bhc80|D030065N23Rik|PFTF1	PHD finger protein 21A	protein-coding
MACS_peak_12837	chr2	92335604	92335913	+	Intergenic	Intergenic	-35083	NM_145832	228368	Mm.273990	NM_145832	ENSMUSG00000049922	Slc35c1	E430007K15Rik|fuct1	solute carrier family 35, member C1	protein-coding
MACS_peak_12843	chr2	93651974	93652536	+	intron (NM_010163, intron 2 of 13)	intron (NM_010163, intron 2 of 13)	10470	NM_010163	14043	Mm.4336	NM_010163	ENSMUSG00000027198	Ext2	AI893565	exostoses (multiple) 2	protein-coding
MACS_peak_12844	chr2	93663585	93664056	+	Intergenic	Intergenic	-1095	NM_010163	14043	Mm.4336	NM_010163	ENSMUSG00000027198	Ext2	AI893565	exostoses (multiple) 2	protein-coding
MACS_peak_12849	chr2	93767827	93768542	+	Intergenic	Intergenic	29073	NM_001145034	620695	Mm.482106	NM_001145034		Gm13889	Ag2|OTTMUSG00000014994	predicted gene 13889	protein-coding
MACS_peak_12850	chr2	93842415	93842953	+	intron (NM_026944, intron 6 of 9)	intron (NM_026944, intron 6 of 9)	8203	NM_026944	69113	Mm.272498	NM_026944	ENSMUSG00000040174	Alkbh3	1700108H04Rik|1810020C19Rik|Abh3|mABH3	alkB, alkylation repair homolog 3 (E. coli)	protein-coding
MACS_peak_12853	chr2	93983440	93983873	+	intron (NM_019657, intron 1 of 10)	B2_Mm1t|SINE|B2	14410	NM_019657	56348	Mm.22505	NM_019657	ENSMUSG00000027195	Hsd17b12	2610510O05Rik|AI172963|KIK-I|Kik1	hydroxysteroid (17-beta) dehydrogenase 12	protein-coding
MACS_peak_12856	chr2	94310775	94311195	+	Intergenic	Intergenic	-32681	NM_007466	11800	Mm.181824	NM_007466	ENSMUSG00000027193	Api5	AAC-11|AI196452	apoptosis inhibitor 5	protein-coding
MACS_peak_12858	chr2	94430548	94431193	+	Intergenic	Intergenic	-152566	NM_007466	11800	Mm.181824	NM_007466	ENSMUSG00000027193	Api5	AAC-11|AI196452	apoptosis inhibitor 5	protein-coding
MACS_peak_12860	chr2	94604414	94605120	+	Intergenic	Intergenic	-326463	NM_007466	11800	Mm.181824	NM_007466	ENSMUSG00000027193	Api5	AAC-11|AI196452	apoptosis inhibitor 5	protein-coding
MACS_peak_12866	chr2	96615422	96616026	+	intron (NM_001289742, intron 2 of 7)	RLTR25B|LTR|ERVK	457398	NM_001289743	241568	Mm.241682	NM_178725	ENSMUSG00000050587	Lrrc4c	6430556C10Rik|NGL-1	leucine rich repeat containing 4C	protein-coding
MACS_peak_1287	chr1	139274989	139275564	+	Intergenic	Intergenic	-418251	NM_030676	26424	Mm.16794	NM_030676	ENSMUSG00000026398	Nr5a2	AU020803|D1Ertd308e|Ftf|LRH-1|UF2-H3B	nuclear receptor subfamily 5, group A, member 2	protein-coding
MACS_peak_12870	chr2	97872095	97872539	+	Intergenic	ETnERV2-int|LTR|ERVK	564503	NM_178725	241568	Mm.241682	NM_178725	ENSMUSG00000050587	Lrrc4c	6430556C10Rik|NGL-1	leucine rich repeat containing 4C	protein-coding
MACS_peak_12872	chr2	98170052	98170477	+	Intergenic	IAPLTR3-int|LTR|ERVK	862450	NM_178725	241568	Mm.241682	NM_178725	ENSMUSG00000050587	Lrrc4c	6430556C10Rik|NGL-1	leucine rich repeat containing 4C	protein-coding
MACS_peak_12880	chr2	99398277	99398729	+	Intergenic	RLTR25B|LTR|ERVK	-2066402	NM_009020	19374	Mm.4988	NM_009020	ENSMUSG00000032864	Rag2	Rag-2	recombination activating gene 2	protein-coding
MACS_peak_12882	chr2	99656142	99656721	+	Intergenic	BGLII|LTR|ERVK	-1808474	NM_009020	19374	Mm.4988	NM_009020	ENSMUSG00000032864	Rag2	Rag-2	recombination activating gene 2	protein-coding
MACS_peak_12887	chr2	101505348	101505774	+	Intergenic	Intergenic	-13036	NM_009424	22034	Mm.292729	NM_009424	ENSMUSG00000027164	Traf6	2310003F17Rik|AI851288|C630032O20Rik	TNF receptor-associated factor 6	protein-coding
MACS_peak_12888	chr2	101506073	101506793	+	Intergenic	Intergenic	-12164	NM_009424	22034	Mm.292729	NM_009424	ENSMUSG00000027164	Traf6	2310003F17Rik|AI851288|C630032O20Rik	TNF receptor-associated factor 6	protein-coding
MACS_peak_1289	chr1	139286730	139287317	+	Intergenic	Intergenic	-429998	NM_030676	26424	Mm.16794	NM_030676	ENSMUSG00000026398	Nr5a2	AU020803|D1Ertd308e|Ftf|LRH-1|UF2-H3B	nuclear receptor subfamily 5, group A, member 2	protein-coding
MACS_peak_12891	chr2	101821337	101821744	+	intron (NM_178886, intron 4 of 5)	intron (NM_178886, intron 4 of 5)	95121	NM_029635	76501	Mm.330424	NM_029635	ENSMUSG00000027163	Commd9	1810029F08Rik|AA409293	COMM domain containing 9	protein-coding
MACS_peak_12893	chr2	101950447	101950954	+	intron (NM_178886, intron 2 of 5)	intron (NM_178886, intron 2 of 5)	75917	NM_178886	241576	Mm.489740	NM_178886	ENSMUSG00000048058	Ldlrad3	6430500P08|AI194318|Lrad3	low density lipoprotein receptor class A domain containing 3	protein-coding
MACS_peak_12895	chr2	102130213	102130686	+	Intergenic	Intergenic	-103832	NM_001290784	241576	Mm.489740	NM_178886	ENSMUSG00000048058	Ldlrad3	6430500P08|AI194318|Lrad3	low density lipoprotein receptor class A domain containing 3	protein-coding
MACS_peak_12896	chr2	102244015	102244608	+	Intergenic	Intergenic	-3254	NM_020267	80985	Mm.315002	NM_020267	ENSMUSG00000027189	Trim44	Dipb|Mc7	tripartite motif-containing 44	protein-coding
MACS_peak_12897	chr2	102429948	102430430	+	intron (NM_173749, intron 3 of 10)	intron (NM_173749, intron 3 of 10)	40011	NM_173749	210622	Mm.28649	NM_173749	ENSMUSG00000027188	Pamr1	5930437L24|E430002G05Rik|Ramp	peptidase domain containing associated with muscle regeneration 1	protein-coding
MACS_peak_12899	chr2	102799580	102800055	+	Intergenic	MER74A|LTR|ERVL	-57995	NM_001039150	12505	Mm.423621	NM_009851	ENSMUSG00000005087	Cd44	AU023126|AW121933|AW146109|HERMES|Ly-24|Pgp-1	CD44 antigen	protein-coding
MACS_peak_12903	chr2	103188087	103188612	+	intron (NR_040332, intron 1 of 2)	intron (NR_040332, intron 1 of 2)	24572	NR_040332	319854	Mm.403818	NR_040332	ENSMUSG00000087278	A930006I01Rik	-	RIKEN cDNA A930006I01 gene	ncRNA
MACS_peak_12905	chr2	103231867	103232318	+	Intergenic	Intergenic	-19171	NR_040332	319854	Mm.403818	NR_040332	ENSMUSG00000087278	A930006I01Rik	-	RIKEN cDNA A930006I01 gene	ncRNA
MACS_peak_12907	chr2	103584185	103584610	+	intron (NM_153126, intron 9 of 28)	intron (NM_153126, intron 9 of 28)	17010	NM_153126	98956	Mm.288005	NM_153126	ENSMUSG00000027185	Nat10	AI429152	N-acetyltransferase 10	protein-coding
MACS_peak_12908	chr2	103609809	103610320	+	intron (NM_001111290, intron 14 of 17)	intron (NM_001111290, intron 14 of 17)	-8657	NM_153126	98956	Mm.288005	NM_153126	ENSMUSG00000027185	Nat10	AI429152	N-acetyltransferase 10	protein-coding
MACS_peak_1291	chr1	139634638	139635241	+	Intergenic	RLTR17|LTR|ERVK	-228093	NR_029795	735252		NR_029795	miRBase:MI0000697	Mir181a-1	Mirn181a-1|Mirn213|miR-213|mmu-mir-213	microRNA 181a-1	ncRNA
MACS_peak_12910	chr2	103682357	103683056	+	Intergenic	Intergenic	-31927	NR_040514	78031	Mm.243867	NR_040514	ENSMUSG00000086687	4930547E08Rik	-	RIKEN cDNA 4930547E08 gene	ncRNA
MACS_peak_12911	chr2	103707840	103708654	+	Intergenic	MIRc|SINE|MIR	-57468	NR_040514	78031	Mm.243867	NR_040514	ENSMUSG00000086687	4930547E08Rik	-	RIKEN cDNA 4930547E08 gene	ncRNA
MACS_peak_1292	chr1	139843203	139843728	+	Intergenic	B2_Mm2|SINE|B2	-19567	NR_029795	735252		NR_029795	miRBase:MI0000697	Mir181a-1	Mirn181a-1|Mirn213|miR-213|mmu-mir-213	microRNA 181a-1	ncRNA
MACS_peak_12921	chr2	104211738	104212392	+	intron (NM_001033347, intron 1 of 20)	intron (NM_001033347, intron 1 of 20)	38426	NM_001033347	241589	Mm.358909	NM_001033347	ENSMUSG00000068373	D430041D05Rik	9630056G07Rik|G2	RIKEN cDNA D430041D05 gene	protein-coding
MACS_peak_12923	chr2	104657912	104658706	+	Intergenic	Intergenic	-1456	NM_001123327	99003	Mm.274314	NM_001123327	ENSMUSG00000074994	Qser1	4732486I23Rik|AI502974	glutamine and serine rich 1	protein-coding
MACS_peak_12925	chr2	104680990	104681582	+	intron (NM_178695, intron 4 of 5)	B2_Mm2|SINE|B2	8721	NM_178695	228413	Mm.259609	NM_178695	ENSMUSG00000027171	Prrg4	9930111I18Rik|TMG4	proline rich Gla (G-carboxyglutamic acid) 4 (transmembrane)	protein-coding
MACS_peak_12926	chr2	104695910	104696783	+	Intergenic	Intergenic	-6339	NM_178695	228413	Mm.259609	NM_178695	ENSMUSG00000027171	Prrg4	9930111I18Rik|TMG4	proline rich Gla (G-carboxyglutamic acid) 4 (transmembrane)	protein-coding
MACS_peak_12932	chr2	105456448	105457108	+	intron (NR_002867, intron 1 of 3)	intron (NR_002867, intron 1 of 3)	44722	NR_117095	103164605	Mm.444995	NR_117095		Paupar	-	Pax6 upstream antisense RNA	ncRNA
MACS_peak_12934	chr2	105531117	105531884	+	intron (NM_013627, intron 7 of 12)	intron (NM_013627, intron 7 of 12)	15214	NM_001244202	18508	Mm.3608	NM_013627	ENSMUSG00000027168	Pax6	1500038E17Rik|AEY11|Dey|Gsfaey11|Pax-6|Sey	paired box 6	protein-coding
MACS_peak_12936	chr2	106295906	106296724	+	Intergenic	ORR1B2|LTR|MaLR	66945	NR_040637	329483	Mm.246777	NR_040637	ENSMUSG00000087226	Gm14015	9330126M15|OTTMUSG00000015366	predicted gene 14015	ncRNA
MACS_peak_12941	chr2	106517485	106518202	+	Intergenic	Intergenic	-15773	NM_001143683	77015	Mm.45628	NM_029837	ENSMUSG00000016386	Mpped2	239Fb|2700082O15Rik|AV354767|AW060960	metallophosphoesterase domain containing 2	protein-coding
MACS_peak_12944	chr2	106590796	106591484	+	intron (NM_029837, intron 3 of 6)	intron (NM_029837, intron 3 of 6)	55382	NM_029837	77015	Mm.45628	NM_029837	ENSMUSG00000016386	Mpped2	239Fb|2700082O15Rik|AV354767|AW060960	metallophosphoesterase domain containing 2	protein-coding
MACS_peak_12945	chr2	106662603	106663115	+	intron (NM_029837, intron 4 of 6)	intron (NM_029837, intron 4 of 6)	127101	NM_029837	77015	Mm.45628	NM_029837	ENSMUSG00000016386	Mpped2	239Fb|2700082O15Rik|AV354767|AW060960	metallophosphoesterase domain containing 2	protein-coding
MACS_peak_12949	chr2	107263128	107263498	+	Intergenic	RLTR10E|LTR|ERVK	132567	NM_021275	16492	Mm.142718	NM_021275	ENSMUSG00000042604	Kcna4	Kv1.4	potassium voltage-gated channel, shaker-related subfamily, member 4	protein-coding
MACS_peak_12950	chr2	107355355	107356082	+	Intergenic	RLTR13D6|LTR|ERVK	224972	NM_021275	16492	Mm.142718	NM_021275	ENSMUSG00000042604	Kcna4	Kv1.4	potassium voltage-gated channel, shaker-related subfamily, member 4	protein-coding
MACS_peak_12955	chr2	108683721	108684485	+	Intergenic	RLTR13D6|LTR|ERVK	434344	NM_029790	76894	Mm.330451	NM_029790	ENSMUSG00000057234	Mettl15	0610027B03Rik|AI303697|AW049952|Mett5d1	methyltransferase like 15	protein-coding
MACS_peak_12958	chr2	109683186	109683691	+	Intergenic	ORR1A2|LTR|MaLR	-47597	NM_011699	22343	Mm.235300	NM_011699	ENSMUSG00000027162	Lin7c	9130007B12Rik|AI303698|AU019331|AW125731|D2Ertd520e|LIN-7-C|LIN-7C|MALS-3|Veli3	lin-7 homolog C (C. elegans)	protein-coding
MACS_peak_12961	chr2	109757496	109758050	+	promoter-TSS (NM_172671)	promoter-TSS (NM_172671)	-31	NM_172671	107515	Mm.277351	NM_172671	ENSMUSG00000050199	Lgr4	9130225G07|A330106J01Rik|A930009A08Rik|Gpr48	leucine-rich repeat-containing G protein-coupled receptor 4	protein-coding
MACS_peak_12962	chr2	109782142	109782689	+	intron (NM_172671, intron 1 of 17)	intron (NM_172671, intron 1 of 17)	24611	NM_172671	107515	Mm.277351	NM_172671	ENSMUSG00000050199	Lgr4	9130225G07|A330106J01Rik|A930009A08Rik|Gpr48	leucine-rich repeat-containing G protein-coupled receptor 4	protein-coding
MACS_peak_12963	chr2	109783125	109783810	+	intron (NM_172671, intron 1 of 17)	intron (NM_172671, intron 1 of 17)	25663	NM_172671	107515	Mm.277351	NM_172671	ENSMUSG00000050199	Lgr4	9130225G07|A330106J01Rik|A930009A08Rik|Gpr48	leucine-rich repeat-containing G protein-coupled receptor 4	protein-coding
MACS_peak_12969	chr2	111086544	111086918	+	Intergenic	IAP-d-int|LTR|ERVK	-10543	NM_146395	258390	Mm.377474	NM_146395	ENSMUSG00000063844	Olfr1276	MOR245-10	olfactory receptor 1276	protein-coding
MACS_peak_1297	chr1	140516618	140517080	+	promoter-TSS (NM_021605)	promoter-TSS (NM_021605)	-576	NM_021605	59125	Mm.143817	NM_021605	ENSMUSG00000026393	Nek7	2810460C19Rik|AU020186	NIMA (never in mitosis gene a)-related expressed kinase 7	protein-coding
MACS_peak_12971	chr2	111359612	111360351	+	Intergenic	MMETn-int|LTR|ERVK	18463	NM_146885	258887	Mm.223297	NM_146885	ENSMUSG00000094000	Olfr1294	MOR248-7	olfactory receptor 1294	protein-coding
MACS_peak_12978	chr2	112218908	112219401	+	promoter-TSS (NM_024254)	promoter-TSS (NM_024254)	-214	NM_024254	72425	Mm.425091	NM_024254	ENSMUSG00000027132	Katnbl1	2410042D21Rik|AA166487|AA473307|AI467442	katanin p80 subunit B like 1	protein-coding
MACS_peak_12979	chr2	112337683	112338217	+	intron (NM_028844, intron 1 of 5)	B1_Mus2|SINE|Alu	4829	NM_028844	74268	Mm.315125	NM_028844		Aven	1700013A01Rik|1700056A21Rik|mAven-L|mAven-S	apoptosis, caspase activation inhibitor	protein-coding
MACS_peak_12983	chr2	112771796	112772489	+	intron (NM_177652, intron 10 of 103)	intron (NM_177652, intron 10 of 103)	98346	NM_177652	20192	Mm.436657	NM_177652	ENSMUSG00000057378	Ryr3	AI851294|C230090H21|RYR-3	ryanodine receptor 3	protein-coding
MACS_peak_12984	chr2	113037623	113038108	+	Intergenic	Intergenic	-88024	NM_029232	75275	Mm.159484	NM_029232	ENSMUSG00000041255	Tmco5b	4930563P21Rik	transmembrane and coiled-coil domains 5B	protein-coding
MACS_peak_12985	chr2	113647310	113647790	+	intron (NM_009162, intron 2 of 5)	intron (NM_009162, intron 2 of 5)	21698	NM_009162	20394	Mm.4836	NM_009162	ENSMUSG00000023236	Scg5	7B2|AI325031|Sgne-1|Sgne1	secretogranin V	protein-coding
MACS_peak_12988	chr2	114480606	114481030	+	promoter-TSS (NM_025675)	promoter-TSS (NM_025675)	-154	NM_025675	66632	Mm.117809	NM_025675	ENSMUSG00000057147	Dph6	5730421E18Rik|Atpbd4	diphthamine biosynthesis 6	protein-coding
MACS_peak_1299	chr1	141273422	141273861	+	promoter-TSS (NM_133239)	promoter-TSS (NM_133239)	12	NM_133239	170788	Mm.95700	NM_133239	ENSMUSG00000063681	Crb1	7530426H14Rik|A930008G09Rik	crumbs homolog 1 (Drosophila)	protein-coding
MACS_peak_12992	chr2	115545660	115546576	+	intron (NM_207264, intron 10 of 10)	LTRIS2|LTR|ERV1	81657	NR_035476	100316703		NR_035476		Mir1951	mmu-mir-1951	microRNA 1951	ncRNA
MACS_peak_12993	chr2	115548908	115549648	+	intron (NM_207264, intron 10 of 10)	intron (NM_207264, intron 10 of 10)	84817	NR_035476	100316703		NR_035476		Mir1951	mmu-mir-1951	microRNA 1951	ncRNA
MACS_peak_12994	chr2	115695707	115696124	+	intron (NM_010825, intron 9 of 11)	intron (NM_010825, intron 9 of 11)	194442	NM_001159569	17536	Mm.247566	NM_010825	ENSMUSG00000027210	Meis2	A430109D20Rik|Mrg1|Stra10	Meis homeobox 2	protein-coding
MACS_peak_12995	chr2	115885802	115886240	+	intron (NM_010825, intron 4 of 11)	intron (NM_010825, intron 4 of 11)	4336	NM_001159569	17536	Mm.247566	NM_010825	ENSMUSG00000027210	Meis2	A430109D20Rik|Mrg1|Stra10	Meis homeobox 2	protein-coding
MACS_peak_12997	chr2	116068770	116069385	+	Intergenic	RLTR13D6|LTR|ERVK	-167245	NR_033447	69974	Mm.440293	NR_033447		2810405F15Rik	-	RIKEN cDNA 2810405F15 gene	ncRNA
MACS_peak_12999	chr2	116225656	116226325	+	Intergenic	BGLII_A|LTR|ERVK	-324158	NR_033447	69974	Mm.440293	NR_033447		2810405F15Rik	-	RIKEN cDNA 2810405F15 gene	ncRNA
MACS_peak_1300	chr1	141308839	141309508	+	Intergenic	RLTR13D6|LTR|ERVK	-9787	NM_172643	226470	Mm.119711	NM_172643	ENSMUSG00000033964	Zbtb41	8430415N23Rik|9430031N01|9830132G07Rik|AI316857	zinc finger and BTB domain containing 41 homolog	protein-coding
MACS_peak_13002	chr2	116767847	116768833	+	Intergenic	Intergenic	42452	NR_040335	320975	Mm.132509	NR_040335	ENSMUSG00000085316	D330050G23Rik	-	RIKEN cDNA D330050G23 gene	ncRNA
MACS_peak_13004	chr2	116945415	116946045	+	Intergenic	Intergenic	-1077	NM_001277256	114715	Mm.245890	NM_033524	ENSMUSG00000027351	Spred1	5730461F13Rik|AL024345|AW047647	sprouty protein with EVH-1 domain 1, related sequence	protein-coding
MACS_peak_13007	chr2	117101449	117102128	+	Intergenic	L1Md_F2|LINE|L1	26313	NM_026620	68215	Mm.219389	NM_026620	ENSMUSG00000027349	Fam98b	2610510H03Rik	family with sequence similarity 98, member B	protein-coding
MACS_peak_1301	chr1	141322323	141322832	+	intron (NM_172643, intron 2 of 10)	intron (NM_172643, intron 2 of 10)	3617	NM_172643	226470	Mm.119711	NM_172643	ENSMUSG00000033964	Zbtb41	8430415N23Rik|9430031N01|9830132G07Rik|AI316857	zinc finger and BTB domain containing 41 homolog	protein-coding
MACS_peak_13010	chr2	118110949	118111378	+	intron (NM_201367, intron 1 of 2)	intron (NM_201367, intron 1 of 2)	-19487	NR_045919	73358	Mm.437192	NR_045919	ENSMUSG00000085889	1700054M17Rik	-	RIKEN cDNA 1700054M17 gene	ncRNA
MACS_peak_13013	chr2	118362769	118363364	+	intron (NM_138313, intron 4 of 4)	intron (NM_138313, intron 4 of 4)	12348	NM_138313	171543	Mm.210125	NM_138313	ENSMUSG00000040093	Bmf	AW260063|AW411872	BCL2 modifying factor	protein-coding
MACS_peak_13016	chr2	118413245	118414120	+	Intergenic	RLTR17|LTR|ERVK	-10265	NM_009773	12236	Mm.29133	NM_009773	ENSMUSG00000040084	Bub1b	AU045529|BUBR1	budding uninhibited by benzimidazoles 1 homolog, beta (S. cerevisiae)	protein-coding
MACS_peak_13018	chr2	118466785	118467466	+	3' UTR (NM_009773, exon 23 of 23)	3' UTR (NM_009773, exon 23 of 23)	-22188	NM_001033254	214230	Mm.241857	NM_001033254	ENSMUSG00000074923	Pak6	4732456M09	p21 protein (Cdc42/Rac)-activated kinase 6	protein-coding
MACS_peak_13020	chr2	118686945	118687337	+	promoter-TSS (NM_019826)	promoter-TSS (NM_019826)	-595	NM_019826	56357	Mm.6635	NM_019826	ENSMUSG00000027332	Ivd	1300016K07Rik|6720455E18Rik|AI463340	isovaleryl coenzyme A dehydrogenase	protein-coding
MACS_peak_13021	chr2	118872272	118872860	+	promoter-TSS (NM_029617)	promoter-TSS (NM_029617)	-289	NM_029617	76464	Mm.202518	NM_029617	ENSMUSG00000027326	Casc5	2310043D08Rik|5730505K17Rik	cancer susceptibility candidate 5	protein-coding
MACS_peak_13022	chr2	118934201	118934696	+	Intergenic	RMER21A|LTR|ERV1	-4105	NM_011234	19361	Mm.330492	NM_011234		Rad51	AV304093|Rad51a|Reca	RAD51 homolog	protein-coding
MACS_peak_13023	chr2	118953697	118954432	+	intron (NM_011234, intron 6 of 9)	B3A|SINE|B2	15511	NM_011234	19361	Mm.330492	NM_011234		Rad51	AV304093|Rad51a|Reca	RAD51 homolog	protein-coding
MACS_peak_13028	chr2	119210345	119210775	+	intron (NM_026574, intron 29 of 35)	RLTR20A|LTR|ERVK	33582	NM_026929	69065	Mm.35083	NM_026929	ENSMUSG00000027313	Chac1	1810008K03Rik	ChaC, cation transport regulator 1	protein-coding
MACS_peak_13029	chr2	119286660	119287079	+	intron (NM_026574, intron 1 of 35)	B2_Mm2|SINE|B2	16496	NM_026574	68142	Mm.330496	NM_026574	ENSMUSG00000034154	Ino80	2310079N15Rik|4632409L19Rik|Inoc1	INO80 homolog (S. cerevisiae)	protein-coding
MACS_peak_13030	chr2	119288747	119290193	+	intron (NM_026574, intron 1 of 35)	intron (NM_026574, intron 1 of 35)	13895	NM_026574	68142	Mm.330496	NM_026574	ENSMUSG00000034154	Ino80	2310079N15Rik|4632409L19Rik|Inoc1	INO80 homolog (S. cerevisiae)	protein-coding
MACS_peak_13032	chr2	119447128	119447594	+	intron (NM_001042652, intron 1 of 9)	RMER10B|LTR|ERVL	-3120	NM_001042653	70645	Mm.246412	NM_001042653		Oip5	5730547N13Rik|Lint-25|Ms18b	Opa interacting protein 5	protein-coding
MACS_peak_13035	chr2	119615454	119616148	+	Intergenic	Intergenic	-2528	NM_001163701	68925	Mm.259223	NM_177294	ENSMUSG00000034032	Rpap1	1190005L06Rik|A730023M06Rik|AU041788|AW107702|mKIAA1403	RNA polymerase II associated protein 1	protein-coding
MACS_peak_13037	chr2	119669111	119669836	+	Intergenic	RLTR41|LTR|ERV1	44223	NM_019392	22174	Mm.2901	NM_019392	ENSMUSG00000027298	Tyro3	AI323366|Brt|Dtk|Etk-2|Rse|Sky|TK19-2|Tif|etk2/tyro3	TYRO3 protein tyrosine kinase 3	protein-coding
MACS_peak_1304	chr1	141572470	141573224	+	Intergenic	MMETn-int|LTR|ERVK	104969	NM_001029977	214403	Mm.337613	NM_001029977	ENSMUSG00000070594	Gm4788	Cfhrc|EG214403	predicted gene 4788	protein-coding
MACS_peak_13040	chr2	119996446	119996768	+	intron (NM_177845, intron 17 of 19)	intron (NM_177845, intron 17 of 19)	-16296	NM_133838	98878	Mm.132226	NM_133838	ENSMUSG00000027293	Ehd4	2210022F10Rik|AI197390|AI846352|AV006278|Past2	EH-domain containing 4	protein-coding
MACS_peak_13042	chr2	120069545	120070307	+	intron (NM_177845, intron 1 of 19)	ORR1C2|LTR|MaLR	1145	NM_177845	329502	Mm.330505	NM_177845	ENSMUSG00000050211	Pla2g4e	2310026J01Rik|C230096D22|Pla2epsilon	phospholipase A2, group IVE	protein-coding
MACS_peak_13043	chr2	120304313	120304812	+	intron (NM_001109761, intron 1 of 20)	B3|SINE|B2	1917	NM_001109761	12335	Mm.458021	NM_007601	ENSMUSG00000079110	Capn3	AI323605|Capa-3|Capa3|Lp82|p94	calpain 3	protein-coding
MACS_peak_13044	chr2	120339675	120340437	+	intron (NM_011743, intron 17 of 21)	intron (NM_011743, intron 17 of 21)	37411	NM_001109761	12335	Mm.458021	NM_007601	ENSMUSG00000079110	Capn3	AI323605|Capa-3|Capa3|Lp82|p94	calpain 3	protein-coding
MACS_peak_13045	chr2	120388882	120389331	+	intron (NM_011743, intron 1 of 21)	intron (NM_011743, intron 1 of 21)	461	NM_011743	20402	Mm.485295	NM_011743	ENSMUSG00000027288	Zfp106	Cd-1|D2Dcr28|H3a|Sh3bp3|Znf106|sirm	zinc finger protein 106	protein-coding
MACS_peak_13050	chr2	121096141	121096843	+	intron (NM_001290830, intron 1 of 26)	intron (NM_001290830, intron 1 of 26)	651	NM_001290830	27223	Mm.215389	NM_013735	ENSMUSG00000043909	Trp53bp1	53BP1|Tp53bp1|m53BP1|p53BP1	transformation related protein 53 binding protein 1	protein-coding
MACS_peak_13052	chr2	121164774	121165366	+	intron (NM_178795, intron 17 of 29)	B3|SINE|B2	11679	NM_178795	327655	Mm.386076	NM_178795	ENSMUSG00000033526	Ppip5k1	B430315C20Rik|Hisppd2a|mKIAA0377	diphosphoinositol pentakisphosphate kinase 1	protein-coding
MACS_peak_13055	chr2	121282862	121283737	+	promoter-TSS (NM_001025371)	promoter-TSS (NM_001025371)	475	NM_026318	67693	Mm.330525	NM_026318		Hypk	2310003F16Rik|HSPC136	huntingtin interacting protein K	protein-coding
MACS_peak_13057	chr2	121302993	121303647	+	Intergenic	Intergenic	-3561	NM_001081975	100034361	Mm.270393	NM_001081975		Mfap1b	-	microfibrillar-associated protein 1B	protein-coding
MACS_peak_1306	chr1	142084819	142085600	+	Intergenic	RLTR13D6|LTR|ERVK	-5221	NM_009888	12628	Mm.8655	NM_009888	ENSMUSG00000026365	Cfh	Mud-1|NOM|Sas-1|Sas1	complement component factor h	protein-coding
MACS_peak_13061	chr2	121371792	121372098	+	3' UTR (NM_172673, exon 15 of 15)	3' UTR (NM_172673, exon 15 of 15)	39486	NM_001290986	241627	Mm.293284	NM_030234	ENSMUSG00000027242	Wdr76	5830411K18Rik|6030457D09|AA517836	WD repeat domain 76	protein-coding
MACS_peak_13063	chr2	121468005	121469420	+	intron (NM_172673, intron 1 of 14)	B1_Mur1|SINE|Alu	136253	NM_001290986	241627	Mm.293284	NM_030234	ENSMUSG00000027242	Wdr76	5830411K18Rik|6030457D09|AA517836	WD repeat domain 76	protein-coding
MACS_peak_13064	chr2	121573954	121574595	+	intron (NM_172673, intron 1 of 14)	intron (NM_172673, intron 1 of 14)	58519	NM_172673	228564	Mm.121514	NM_172673	ENSMUSG00000027238	Frmd5	1500032A09Rik|5830442F04|A930004K21Rik|R75430	FERM domain containing 5	protein-coding
MACS_peak_13065	chr2	121590520	121591031	+	intron (NM_172673, intron 1 of 14)	intron (NM_172673, intron 1 of 14)	42018	NM_172673	228564	Mm.121514	NM_172673	ENSMUSG00000027238	Frmd5	1500032A09Rik|5830442F04|A930004K21Rik|R75430	FERM domain containing 5	protein-coding
MACS_peak_13067	chr2	121720904	121721644	+	intron (NM_001205371, intron 1 of 9)	RLTR13D6|LTR|ERVK	27833	NM_001205371	319996	Mm.292109	NM_177054	ENSMUSG00000060227	Casc4	D130060C09Rik|VGFG2573	cancer susceptibility candidate 4	protein-coding
MACS_peak_13068	chr2	121741043	121741535	+	intron (NM_199038, intron 7 of 7)	intron (NM_199038, intron 7 of 7)	-40448	NM_001290992	329506	Mm.249405	NM_212450	ENSMUSG00000033411	Ctdspl2	D2Ertd485e	CTD (carboxy-terminal domain, RNA polymerase II, polypeptide A) small phosphatase like 2	protein-coding
MACS_peak_1308	chr1	142325854	142326382	+	intron (NM_001081027, intron 11 of 27)	intron (NM_001081027, intron 11 of 27)	183284	NM_001081027	240776	Mm.483845	NM_001081027	ENSMUSG00000052726	Kcnt2	E330038N15Rik|Slick	potassium channel, subfamily T, member 2	protein-coding
MACS_peak_13087	chr2	123729426	123729892	+	Intergenic	RLTR44-int|LTR|ERVK	-186046	NM_001290997	214968	Mm.330536	NM_172537	ENSMUSG00000027200	Sema6d	1110067B02Rik|AA409156|D330011G23|mKIAA1479	sema domain, transmembrane domain (TM), and cytoplasmic domain, (semaphorin) 6D	protein-coding
MACS_peak_13088	chr2	123971131	123971717	+	intron (NM_001290997, intron 2 of 20)	intron (NM_001290997, intron 2 of 20)	-15732	NR_040611	74702	Mm.410814	NR_040611	ENSMUSG00000085496	4930517E11Rik	-	RIKEN cDNA 4930517E11 gene	ncRNA
MACS_peak_1309	chr1	142331349	142331854	+	intron (NM_001081027, intron 12 of 27)	intron (NM_001081027, intron 12 of 27)	188767	NM_001081027	240776	Mm.483845	NM_001081027	ENSMUSG00000052726	Kcnt2	E330038N15Rik|Slick	potassium channel, subfamily T, member 2	protein-coding
MACS_peak_13091	chr2	124230318	124230792	+	intron (NM_001290997, intron 4 of 20)	intron (NM_001290997, intron 4 of 20)	-182461	NR_040612	75946	Mm.415059	NR_040612	ENSMUSG00000086954	4930583P06Rik	-	RIKEN cDNA 4930583P06 gene	ncRNA
MACS_peak_13092	chr2	124462792	124463341	+	intron (NM_199238, intron 1 of 16)	intron (NM_199238, intron 1 of 16)	-16251	NM_199240	214968	Mm.330536	NM_172537	ENSMUSG00000027200	Sema6d	1110067B02Rik|AA409156|D330011G23|mKIAA1479	sema domain, transmembrane domain (TM), and cytoplasmic domain, (semaphorin) 6D	protein-coding
MACS_peak_13097	chr2	124932148	124932792	+	intron (NM_001162417, intron 9 of 18)	RLTR13B1|LTR|ERVK	16926	NM_001162417	17876	Mm.18535	NM_010852	ENSMUSG00000027201	Myef2	9430071B01|mKIAA1341	myelin basic protein expression factor 2, repressor	protein-coding
MACS_peak_13098	chr2	124939957	124940513	+	intron (NM_001162417, intron 3 of 18)	B3|SINE|B2	9161	NM_001162417	17876	Mm.18535	NM_010852	ENSMUSG00000027201	Myef2	9430071B01|mKIAA1341	myelin basic protein expression factor 2, repressor	protein-coding
MACS_peak_13099	chr2	124945279	124945844	+	intron (NM_001162417, intron 1 of 18)	intron (NM_001162417, intron 1 of 18)	3835	NM_001162417	17876	Mm.18535	NM_010852	ENSMUSG00000027201	Myef2	9430071B01|mKIAA1341	myelin basic protein expression factor 2, repressor	protein-coding
MACS_peak_131	chr1	13049527	13050600	+	Intergenic	(TCC)n|Simple_repeat|Simple_repeat	67181	NM_001081209	383491	Mm.309380	NM_001081209	ENSMUSG00000042414	Prdm14	-	PR domain containing 14	protein-coding
MACS_peak_1310	chr1	142349880	142350642	+	intron (NM_001081027, intron 13 of 27)	BGLII|LTR|ERVK	202718	NR_040604	75910	Mm.483845	NR_040604		4930590L20Rik	-	RIKEN cDNA 4930590L20 gene	ncRNA
MACS_peak_13100	chr2	124961464	124961846	+	promoter-TSS (NM_001162934)	promoter-TSS (NM_001162934)	-773	NM_001162934	381418	Mm.295608	NM_001162934	ENSMUSG00000074872	Ctxn2	BB181834|Gm1638	cortexin 2	protein-coding
MACS_peak_13104	chr2	125530421	125531155	+	intron (NM_199022, intron 1 of 11)	intron (NM_199022, intron 1 of 11)	19096	NM_199022	271849	Mm.425101	NM_199022	ENSMUSG00000035109	Shc4	6230417E10Rik|9930029B02Rik|Gm685|RaLP	SHC (Src homology 2 domain containing) family, member 4	protein-coding
MACS_peak_13106	chr2	125649710	125650284	+	Intergenic	Intergenic	34821	NM_009939	12848	Mm.3596	NM_009939	ENSMUSG00000027206	Cops2	AI315723|C85265|Csn2|Sgn2|TRIP-15|Trip15	COP9 (constitutive photomorphogenic) homolog, subunit 2 (Arabidopsis thaliana)	protein-coding
MACS_peak_1311	chr1	142410070	142410550	+	intron (NM_001081027, intron 17 of 27)	intron (NM_001081027, intron 17 of 27)	142669	NR_040604	75910	Mm.483845	NR_040604		4930590L20Rik	-	RIKEN cDNA 4930590L20 gene	ncRNA
MACS_peak_13110	chr2	126346058	126346461	+	Intergenic	B2_Mm2|SINE|B2	-28970	NM_001080944	241633	Mm.222235	NM_001080944	ENSMUSG00000060131	Atp8b4	A530043E15|Im	ATPase, class I, type 8B, member 4	protein-coding
MACS_peak_13112	chr2	126497598	126498340	+	intron (NM_001271470, intron 1 of 8)	URR1B|DNA|MER1_type	3359	NM_001271469	14391	Mm.293266	NM_010249	ENSMUSG00000027361	Gabpb1	BABPB2|E4TF1|E4TF1-47|E4TF1-53|E4Tf1B|GABPB|GABPB-1|GABPB-2|GABPB1-1|GABPB1-2|NRF2B1|NRF2B2	GA repeat binding protein, beta 1	protein-coding
MACS_peak_13115	chr2	126719880	126720580	+	intron (NM_023220, intron 14 of 14)	B4A|SINE|B4	7891	NR_106202	102466258		NR_106202		Mir3473g	mmu-mir-3473g	microRNA mir-3473g	ncRNA
MACS_peak_13116	chr2	126774860	126775544	+	Intergenic	RLTR25B|LTR|ERVK	-16231	NM_023220	66552	Mm.269928	NM_023220	ENSMUSG00000027366	Sppl2a	2010106G01Rik|C130089K23Rik	signal peptide peptidase like 2A	protein-coding
MACS_peak_13119	chr2	126834082	126834667	+	promoter-TSS (NM_175550)	promoter-TSS (NM_175550)	-73	NM_175550	108011	Mm.134045	NM_175550		Ap4e1	2310033A20Rik|9930028M04Rik|AV087807	adaptor-related protein complex AP-4, epsilon 1	protein-coding
MACS_peak_13122	chr2	127031894	127032357	+	intron (NM_198630, intron 1 of 1)	B2_Mm1a|SINE|B2	1891	NM_198630	329509	Mm.120738	NM_198630	ENSMUSG00000044145	1810024B03Rik	-	RIKEN cDNA 1810024B03 gene	protein-coding
MACS_peak_13125	chr2	127430865	127431519	+	Intergenic	ORR1D1|LTR|MaLR	18030	NM_029963	77721	Mm.274601	NM_029963		Mrps5	1620401I16Rik|AI850294	mitochondrial ribosomal protein S5	protein-coding
MACS_peak_13126	chr2	127540404	127540801	+	intron (NM_145532, intron 1 of 3)	intron (NM_145532, intron 1 of 3)	15031	NM_145532	228576	Mm.133036	NM_145532	ENSMUSG00000027377	Mall	BC012256|BENE	mal, T cell differentiation protein-like	protein-coding
MACS_peak_13128	chr2	127665026	127665796	+	Intergenic	ID_B1|SINE|B4	-7816	NM_009772	12235	Mm.2185	NM_009772	ENSMUSG00000027379	Bub1	AL022991|Bub1a|C80208|D2Xrf87	budding uninhibited by benzimidazoles 1 homolog (S. cerevisiae)	protein-coding
MACS_peak_13129	chr2	128009384	128009943	+	Intergenic	RLTR12A|LTR|ERVK	56352	NM_001284410	12125	Mm.141083	NM_009754	ENSMUSG00000027381	Bcl2l11	1500006F24Rik|Bim|Bod|bcl2-L-11	BCL2-like 11 (apoptosis facilitator)	protein-coding
MACS_peak_13131	chr2	128087375	128087792	+	Intergenic	Intergenic	134272	NM_001284410	12125	Mm.141083	NM_009754	ENSMUSG00000027381	Bcl2l11	1500006F24Rik|Bim|Bod|bcl2-L-11	BCL2-like 11 (apoptosis facilitator)	protein-coding
MACS_peak_13135	chr2	128253694	128254316	+	intron (NR_028591, intron 1 of 1)	intron (NR_028591, intron 1 of 1)	1082	NR_028591	100043424	Mm.297222	NR_028589		Gm14005	OTTMUSG00000015351	predicted gene 14005	ncRNA
MACS_peak_13141	chr2	128786076	128786820	+	Intergenic	RLTR10C|LTR|ERVK	-6690	NM_178404	78751	Mm.26377	NM_178404	ENSMUSG00000042851	Zc3h6	4631426G04Rik|4833425H18Rik|AU024389|AW060453|Zc3hdc6|mKIAA2035	zinc finger CCCH type containing 6	protein-coding
MACS_peak_13142	chr2	128793098	128793510	+	5' UTR (NM_178404, exon 1 of 12)	5' UTR (NM_178404, exon 1 of 12)	166	NM_178404	78751	Mm.26377	NM_178404	ENSMUSG00000042851	Zc3h6	4631426G04Rik|4833425H18Rik|AU024389|AW060453|Zc3hdc6|mKIAA2035	zinc finger CCCH type containing 6	protein-coding
MACS_peak_13144	chr2	128887237	128888003	+	Intergenic	Intergenic	-4063	NM_027192	69737	Mm.33909	NM_027192	ENSMUSG00000027394	Ttl	2410003M22Rik|2700049H19Rik|AI848570	tubulin tyrosine ligase	protein-coding
MACS_peak_13145	chr2	128911296	128912004	+	intron (NM_027192, intron 5 of 6)	LTRIS2|LTR|ERV1	-15082	NM_009086	20017	Mm.259078	NM_009086	ENSMUSG00000027395	Polr1b	128kDa|D630020H17Rik|RPA116|RPA135|RPA2|Rpo1-2	polymerase (RNA) I polypeptide B	protein-coding
MACS_peak_13146	chr2	128955235	128955745	+	promoter-TSS (NM_025395)	promoter-TSS (NM_025395)	54	NM_025395	66170	Mm.40621	NM_025395	ENSMUSG00000037938	Chchd5	1110027L01Rik|AW045710	coiled-coil-helix-coiled-coil-helix domain containing 5	protein-coding
MACS_peak_13147	chr2	129004118	129004706	+	non-coding (NR_045264, exon 3 of 3)	non-coding (NR_045264, exon 3 of 3)	1997	NR_045264	100048701	Mm.428544	NR_045264	ENSMUSG00000084826	AI847159	OTTMUSG00000015420	expressed sequence AI847159	ncRNA
MACS_peak_13153	chr2	129521347	129522148	+	intron (NM_001286502, intron 2 of 3)	intron (NM_001286502, intron 2 of 3)	2647	NM_001286502	18610	Mm.6239	NM_018863	ENSMUSG00000027400	Pdyn	Dyn	prodynorphin	protein-coding
MACS_peak_13154	chr2	129541283	129541698	+	Intergenic	Intergenic	-15816	NM_018863	18610	Mm.6239	NM_018863	ENSMUSG00000027400	Pdyn	Dyn	prodynorphin	protein-coding
MACS_peak_13155	chr2	129624075	129624558	+	non-coding (NR_029452, exon 1 of 1)	non-coding (NR_029452, exon 1 of 1)	-1937	NM_183262	67333	Mm.389329	NM_183262	ENSMUSG00000037885	Stk35	1700054C12Rik|CLIK1|Stk35l1	serine/threonine kinase 35	protein-coding
MACS_peak_13156	chr2	129699160	129699622	+	Intergenic	Intergenic	-72196	NR_029452	654409	Mm.305555	NR_029452		4932416H05Rik	-	RIKEN cDNA 4932416H05 gene	ncRNA
MACS_peak_13159	chr2	130065661	130066086	+	exon (NM_138655, exon 11 of 20)	exon (NM_138655, exon 11 of 20)	-34275	NM_024193	67134	Mm.29363	NM_024193	ENSMUSG00000027405	Nop56	2310044F10Rik|Nol5a	NOP56 ribonucleoprotein	protein-coding
MACS_peak_13160	chr2	130099755	130100447	+	promoter-TSS (NM_024193)	promoter-TSS (NM_024193)	-47	NM_024193	67134	Mm.29363	NM_024193	ENSMUSG00000027405	Nop56	2310044F10Rik|Nol5a	NOP56 ribonucleoprotein	protein-coding
MACS_peak_13163	chr2	130128730	130129239	+	intron (NM_001110513, intron 1 of 16)	intron (NM_001110513, intron 1 of 16)	7309	NM_001110513	228598	Mm.32582	NM_152993	ENSMUSG00000053552	Ebf4	Ebf3|O/E-4|Olf-1	early B cell factor 4	protein-coding
MACS_peak_13165	chr2	130294435	130295007	+	intron (NM_008980, intron 1 of 21)	ID_B1|SINE|B4	18707	NM_001163688	19262	Mm.224246	NM_008980	ENSMUSG00000027303	Ptpra	Ptpa|Ptpalpha|Rptpalpha|Rptra|Rptralpha	protein tyrosine phosphatase, receptor type, A	protein-coding
MACS_peak_13166	chr2	130455529	130456018	+	promoter-TSS (NM_198176)	promoter-TSS (NM_198176)	1	NM_001255993	140629	Mm.486003	NM_080562	ENSMUSG00000027300	Ubox5	1500010O06Rik|C330018L13Rik|Rnf37|UIP5|Ubce7ip5|Ube7ip5	U box domain containing 5	protein-coding
MACS_peak_13167	chr2	130523341	130524109	+	promoter-TSS (NM_001081162)	promoter-TSS (NM_001081162)	-470	NM_001081162	269356	Mm.441391	NM_001081162	ENSMUSG00000074796	Slc4a11	AI503023|BTR1|NaBC1	solute carrier family 4, sodium bicarbonate transporter-like, member 11	protein-coding
MACS_peak_13169	chr2	130920505	130921206	+	Intergenic	Intergenic	-8354	NM_011426	20612	Mm.1374	NM_011426	ENSMUSG00000027322	Siglec1	Cd169|Siglec-1|Sn	sialic acid binding Ig-like lectin 1, sialoadhesin	protein-coding
MACS_peak_13173	chr2	130994582	130994872	+	Intergenic	RLTR12B|LTR|ERVK	5819	NM_027641	70997	Mm.252722	NM_027641	ENSMUSG00000027329	Spef1	4931426K16Rik|Clamp	sperm flagellar 1	protein-coding
MACS_peak_13175	chr2	131079740	131080315	+	Intergenic	B1F|SINE|Alu	-8209	NM_153501	74450	Mm.101264	NM_153501	ENSMUSG00000037514	Pank2	4933409I19Rik|AI642621	pantothenate kinase 2	protein-coding
MACS_peak_13180	chr2	131870201	131870813	+	Intergenic	Intergenic	-14783	NM_175445	215653	Mm.204737	NM_175445	ENSMUSG00000027339	Rassf2	3830431H01Rik|9030412M04Rik|AI852669|AW495050	Ras association (RalGDS/AF-6) domain family member 2	protein-coding
MACS_peak_13182	chr2	131958983	131959641	+	intron (NM_018824, intron 1 of 15)	intron (NM_018824, intron 1 of 15)	11532	NM_018824	54338	Mm.103581	NM_018824	ENSMUSG00000027340	Slc23a2	AI844736|NBTL1|SVCT2|Slc23a1|YSPL2|YSPL3|mKIAA0238	solute carrier family 23 (nucleobase transporters), member 2	protein-coding
MACS_peak_13186	chr2	132443246	132443922	+	intron (NR_033468, intron 4 of 5)	RLTR19|LTR|ERVK	19652	NR_033469	767814	Mm.371752	NR_033468	ENSMUSG00000074783	AU019990	-	expressed sequence AU019990	ncRNA
MACS_peak_13187	chr2	132474011	132474669	+	intron (NR_033468, intron 5 of 5)	ORR1C2|LTR|MaLR	-41679	NM_028637	73747	Mm.284114	NM_028637	ENSMUSG00000044991	1110034G24Rik	-	RIKEN cDNA 1110034G24 gene	protein-coding
MACS_peak_13189	chr2	132512316	132512990	+	Intergenic	Intergenic	-3366	NM_028637	73747	Mm.284114	NM_028637	ENSMUSG00000044991	1110034G24Rik	-	RIKEN cDNA 1110034G24 gene	protein-coding
MACS_peak_13190	chr2	132527045	132527824	+	intron (NM_028637, intron 2 of 2)	intron (NM_028637, intron 2 of 2)	11415	NM_028637	73747	Mm.284114	NM_028637	ENSMUSG00000044991	1110034G24Rik	-	RIKEN cDNA 1110034G24 gene	protein-coding
MACS_peak_13191	chr2	132607414	132607995	+	intron (NM_007694, intron 1 of 4)	intron (NM_007694, intron 1 of 4)	690	NM_007694	12653	Mm.255241	NM_007694	ENSMUSG00000027350	Chgb	Scg-1	chromogranin B	protein-coding
MACS_peak_13193	chr2	132651705	132652317	+	intron (NM_001291054, intron 8 of 18)	RLTR13B4|LTR|ERVK	10134	NM_001291054	66634	Mm.157070	NM_025676	ENSMUSG00000027353	Mcm8	5730432L01Rik	minichromosome maintenance deficient 8 (S. cerevisiae)	protein-coding
MACS_peak_13197	chr2	134281844	134282332	+	Intergenic	Intergenic	98000	NM_010403	15112	Mm.26634	NM_010403	ENSMUSG00000027261	Hao1	GOX|Gox1|Hao-1	hydroxyacid oxidase 1, liver	protein-coding
MACS_peak_132	chr1	13063906	13064525	+	Intergenic	Intergenic	53029	NM_001081209	383491	Mm.309380	NM_001081209	ENSMUSG00000042414	Prdm14	-	PR domain containing 14	protein-coding
MACS_peak_13201	chr2	134786063	134786718	+	intron (NM_001145830, intron 2 of 31)	intron (NM_001145830, intron 2 of 31)	174490	NM_001145830	18795	Mm.330607	NM_019677	ENSMUSG00000051177	Plcb1	3110043I21Rik|AI132408|Plcb|mKIAA0581	phospholipase C, beta 1	protein-coding
MACS_peak_13203	chr2	135155865	135156285	+	exon (NM_019677, exon 15 of 33)	exon (NM_019677, exon 15 of 33)	-114723	NR_040517	78805	Mm.78702	NR_040517	ENSMUSG00000085247	4930545L23Rik	-	RIKEN cDNA 4930545L23 gene	ncRNA
MACS_peak_13206	chr2	135440251	135441173	+	Intergenic	Intergenic	-31756	NR_015544	320684	Mm.421433	NR_015544	ENSMUSG00000085631	9630028H03Rik	-	RIKEN cDNA 9630028H03 gene	ncRNA
MACS_peak_13207	chr2	135482199	135483040	+	Intergenic	Intergenic	-73663	NR_015544	320684	Mm.421433	NR_015544	ENSMUSG00000085631	9630028H03Rik	-	RIKEN cDNA 9630028H03 gene	ncRNA
MACS_peak_1321	chr1	145402541	145403214	+	Intergenic	Intergenic	-84950	NM_020025	26878	Mm.285580	NM_020025	ENSMUSG00000033849	B3galt2	-	UDP-Gal:betaGlcNAc beta 1,3-galactosyltransferase, polypeptide 2	protein-coding
MACS_peak_13210	chr2	135933250	135933709	+	intron (NM_172858, intron 4 of 9)	intron (NM_172858, intron 4 of 9)	49816	NM_029530	76161	Mm.41638	NM_029530	ENSMUSG00000027270	Lamp5	3110035N03Rik|6330527O06Rik|BAD-LAMP|LAMP-5	lysosomal-associated membrane protein family, member 5	protein-coding
MACS_peak_13212	chr2	136200938	136201513	+	intron (NM_172858, intron 1 of 9)	intron (NM_172858, intron 1 of 9)	12478	NM_172858	241656	Mm.131572	NM_172858	ENSMUSG00000039913	Pak7	2900083L08Rik|6430627N20|Pak5	p21 protein (Cdc42/Rac)-activated kinase 7	protein-coding
MACS_peak_13214	chr2	136717228	136717560	+	promoter-TSS (NM_001141946)	promoter-TSS (NM_001141946)	-252	NM_001286983	59030	Mm.272570	NM_021527	ENSMUSG00000027274	Mkks	1300013E18Rik|AI463362|AI957237|Bbs6	McKusick-Kaufman syndrome	protein-coding
MACS_peak_13215	chr2	136918152	136918649	+	intron (NM_013822, intron 9 of 25)	intron (NM_013822, intron 9 of 25)	23856	NM_013822	16449	Mm.22398	NM_013822	ENSMUSG00000027276	Jag1	ABE2|Gsfabe2|Htu|Ozz|Ser-1	jagged 1	protein-coding
MACS_peak_13216	chr2	136923758	136924520	+	intron (NM_013822, intron 5 of 25)	intron (NM_013822, intron 5 of 25)	18117	NM_013822	16449	Mm.22398	NM_013822	ENSMUSG00000027276	Jag1	ABE2|Gsfabe2|Htu|Ozz|Ser-1	jagged 1	protein-coding
MACS_peak_13217	chr2	136942079	136942620	+	promoter-TSS (NM_013822)	promoter-TSS (NM_013822)	-93	NM_013822	16449	Mm.22398	NM_013822	ENSMUSG00000027276	Jag1	ABE2|Gsfabe2|Htu|Ozz|Ser-1	jagged 1	protein-coding
MACS_peak_13218	chr2	137053103	137053550	+	Intergenic	MLT1A0|LTR|MaLR	-111070	NM_013822	16449	Mm.22398	NM_013822	ENSMUSG00000027276	Jag1	ABE2|Gsfabe2|Htu|Ozz|Ser-1	jagged 1	protein-coding
MACS_peak_1322	chr1	145578625	145579428	+	Intergenic	RLTR9A|LTR|ERVK	-7453	NM_001038593	69367	Mm.272727	NM_023505	ENSMUSG00000018196	Glrx2	1700010P22Rik|AI645710|Grx2	glutaredoxin 2 (thioltransferase)	protein-coding
MACS_peak_13221	chr2	137620489	137621062	+	Intergenic	Intergenic	-461545	NM_001025431	228662	Mm.153405	NM_145534	ENSMUSG00000062098	Btbd3	mKIAA0952	BTB (POZ) domain containing 3	protein-coding
MACS_peak_13222	chr2	137764566	137765074	+	Intergenic	Intergenic	-317500	NM_001025431	228662	Mm.153405	NM_145534	ENSMUSG00000062098	Btbd3	mKIAA0952	BTB (POZ) domain containing 3	protein-coding
MACS_peak_13225	chr2	138052199	138052812	+	Intergenic	Intergenic	-29815	NM_001025431	228662	Mm.153405	NM_145534	ENSMUSG00000062098	Btbd3	mKIAA0952	BTB (POZ) domain containing 3	protein-coding
MACS_peak_13227	chr2	138099716	138100214	+	intron (NM_001025431, intron 1 of 4)	intron (NM_001025431, intron 1 of 4)	-4264	NM_145534	228662	Mm.153405	NM_145534	ENSMUSG00000062098	Btbd3	mKIAA0952	BTB (POZ) domain containing 3	protein-coding
MACS_peak_13238	chr2	139696915	139697561	+	intron (NM_001159640, intron 12 of 13)	LTRIS2|LTR|ERV1	193324	NM_001276489	319909	Mm.41113	NM_001126490	ENSMUSG00000074766	Ism1	5430433G21Rik|Ism	isthmin 1 homolog (zebrafish)	protein-coding
MACS_peak_13239	chr2	139699405	139699973	+	intron (NM_001159640, intron 12 of 13)	RLTR9E|LTR|ERVK	192852	NM_001159640	75812	Mm.293449	NM_175225	ENSMUSG00000039033	Tasp1	4930485D02Rik|AW986064	taspase, threonine aspartase 1	protein-coding
MACS_peak_1324	chr1	145580930	145581697	+	Intergenic	Intergenic	-5166	NM_001038593	69367	Mm.272727	NM_023505	ENSMUSG00000018196	Glrx2	1700010P22Rik|AI645710|Grx2	glutaredoxin 2 (thioltransferase)	protein-coding
MACS_peak_13241	chr2	139996079	139996449	+	promoter-TSS (NM_001081090)	promoter-TSS (NM_001081090)	30	NM_001081090	66580	Mm.21228	NM_001081090	ENSMUSG00000045624	Esf1	2610101J03Rik|ABTAP|AW545818|C79684	ESF1, nucleolar pre-rRNA processing protein, homolog (S. cerevisiae)	protein-coding
MACS_peak_13245	chr2	140496959	140497435	+	promoter-TSS (NM_001172160)	promoter-TSS (NM_001172160)	15	NM_001172160	71436	Mm.426781	NM_178382	ENSMUSG00000051379	Flrt3	5530600M07Rik|C430047I10Rik|mKIAA1469	fibronectin leucine rich transmembrane protein 3	protein-coding
MACS_peak_13246	chr2	140502295	140503087	+	intron (NM_001013802, intron 3 of 18)	intron (NM_001013802, intron 3 of 18)	-5479	NM_178382	71436	Mm.426781	NM_178382	ENSMUSG00000051379	Flrt3	5530600M07Rik|C430047I10Rik|mKIAA1469	fibronectin leucine rich transmembrane protein 3	protein-coding
MACS_peak_13247	chr2	140748551	140748883	+	intron (NM_001013802, intron 4 of 18)	intron (NM_001013802, intron 4 of 18)	-251505	NM_178382	71436	Mm.426781	NM_178382	ENSMUSG00000051379	Flrt3	5530600M07Rik|C430047I10Rik|mKIAA1469	fibronectin leucine rich transmembrane protein 3	protein-coding
MACS_peak_13249	chr2	141242624	141243415	+	intron (NM_001013802, intron 5 of 18)	intron (NM_001013802, intron 5 of 18)	-745807	NM_178382	71436	Mm.426781	NM_178382	ENSMUSG00000051379	Flrt3	5530600M07Rik|C430047I10Rik|mKIAA1469	fibronectin leucine rich transmembrane protein 3	protein-coding
MACS_peak_1325	chr1	145988383	145989225	+	intron (NM_153171, intron 4 of 5)	RLTR13B1|LTR|ERVK	35698	NM_153171	246709	Mm.38271	NM_153171	ENSMUSG00000051079	Rgs13	-	regulator of G-protein signaling 13	protein-coding
MACS_peak_13251	chr2	141403883	141404406	+	intron (NM_001013802, intron 6 of 18)	intron (NM_001013802, intron 6 of 18)	-906932	NM_178382	71436	Mm.426781	NM_178382	ENSMUSG00000051379	Flrt3	5530600M07Rik|C430047I10Rik|mKIAA1469	fibronectin leucine rich transmembrane protein 3	protein-coding
MACS_peak_13253	chr2	142561399	142561838	+	intron (NM_001081133, intron 17 of 25)	intron (NM_001081133, intron 17 of 25)	165582	NM_001081133	16558	Mm.251934	NM_001081133	ENSMUSG00000038844	Kif16b	8430434E15Rik|AA623607|AI789011|C80253|C80902|mKIAA1590	kinesin family member 16B	protein-coding
MACS_peak_13256	chr2	142943073	142943695	+	Intergenic	Intergenic	39156	NM_020595	57329	Mm.157751	NM_020595	ENSMUSG00000027416	Otor	CDRAP|Fdp|MIA|MIAL	otoraplin	protein-coding
MACS_peak_13257	chr2	143785086	143785536	+	intron (NM_024281, intron 10 of 23)	L1VL2|LINE|L1	44244	NM_019771	56431	Mm.28919	NM_019771	ENSMUSG00000015932	Dstn	2610043P17Rik|ADF|AU042046|Dsn|corn1|sid23p	destrin	protein-coding
MACS_peak_13263	chr2	144194232	144194816	+	promoter-TSS (NM_181417)	promoter-TSS (NM_181417)	-195	NM_001164813	100048644	Mm.227925	NM_001164813		Pet117	Gm20571	PET117 homolog (S. cerevisiae)	protein-coding
MACS_peak_13265	chr2	144414598	144414969	+	intron (NM_019787, intron 19 of 19)	intron (NM_019787, intron 19 of 19)	-5018	NM_001033297	228715	Mm.27391	NM_001033297	ENSMUSG00000074754	Gm561	-	predicted gene 561	protein-coding
MACS_peak_13270	chr2	144983693	144984017	+	Intergenic	Intergenic	-84492	NM_053195	94249	Mm.217171	NM_053195	ENSMUSG00000063873	Slc24a3	NCKX3	solute carrier family 24 (sodium/potassium/calcium exchanger), member 3	protein-coding
MACS_peak_13275	chr2	145888088	145888912	+	Intergenic	Intergenic	127980	NM_175280	78774	Mm.136347	NM_175280	ENSMUSG00000037143	Cfap61	4930529M08Rik|BB178539|BC024760	cilia and flagella associated protein 61	protein-coding
MACS_peak_13280	chr2	146226321	146227039	+	intron (NM_001033348, intron 21 of 40)	MER74A|LTR|ERVL	111060	NM_001033348	241694	Mm.222310	NM_001033348	ENSMUSG00000037110	Ralgapa2	A230067G21Rik|AS250|BC053994|RGC2|pp250	Ral GTPase activating protein, alpha subunit 2 (catalytic)	protein-coding
MACS_peak_13281	chr2	146292328	146293102	+	intron (NM_001033348, intron 3 of 40)	intron (NM_001033348, intron 3 of 40)	45025	NM_001033348	241694	Mm.222310	NM_001033348	ENSMUSG00000037110	Ralgapa2	A230067G21Rik|AS250|BC053994|RGC2|pp250	Ral GTPase activating protein, alpha subunit 2 (catalytic)	protein-coding
MACS_peak_13285	chr2	146658895	146659497	+	Intergenic	Intergenic	-22429	NM_001033298	228730	Mm.292352	NM_001033298	ENSMUSG00000074749	Kiz	Gm114|Ncrna00153|Plk1s1	kizuna centrosomal protein	protein-coding
MACS_peak_13288	chr2	146837055	146838092	+	Intergenic	Intergenic	-1223	NM_011917	24128	Mm.3065	NM_011917	ENSMUSG00000027433	Xrn2	-	5'-3' exoribonuclease 2	protein-coding
MACS_peak_13289	chr2	146858776	146859297	+	intron (NM_011917, intron 13 of 29)	L2a|LINE|L2	20240	NM_011917	24128	Mm.3065	NM_011917	ENSMUSG00000027433	Xrn2	-	5'-3' exoribonuclease 2	protein-coding
MACS_peak_13290	chr2	147008786	147009308	+	promoter-TSS (NR_030769)	promoter-TSS (NR_030769)	-772	NR_030769	100313531	Mm.405189	NR_030769	ENSMUSG00000086509	Nkx2-2os	Gm14112|Nkx2-2as|Nkx2.2AS|OTTMUSG00000015691	NK2 homeobox 2, opposite strand	ncRNA
MACS_peak_13291	chr2	147118211	147118581	+	intron (NR_030769, intron 3 of 5)	Lx7|LINE|L1	70133	NR_040330	99041	Mm.373081	NR_040330		AI646519	Aspax1|OTTMUSG00000015701	expressed sequence AI646519	ncRNA
MACS_peak_13297	chr2	148361380	148361828	+	Intergenic	Intergenic	-92333	NM_010740	17064	Mm.681	NM_010740	ENSMUSG00000027435	Cd93	6030404G09Rik|AA145088|AA4.1|AW555904|C1qr1|C1qrp|Ly68	CD93 antigen	protein-coding
MACS_peak_13303	chr2	149765164	149765841	+	intron (NM_001085521, intron 3 of 3)	intron (NM_001085521, intron 3 of 3)	108983	NM_001085521	433485	Mm.330649	NM_001085521	ENSMUSG00000074736	Syndig1	AW123113|DSPC2|Gm14134|H2C20orf39|OTTMUSG00000015750|Tmem90b	synapse differentiation inducing 1	protein-coding
MACS_peak_13305	chr2	149962308	149962832	+	promoter-TSS (NM_023266)	promoter-TSS (NM_023266)	-156	NM_181266	104348	Mm.485851	NM_023266	ENSMUSG00000068134	Zfp120	AI315103|E030042N05Rik|F80|MZF31|Zfp844	zinc finger protein 120	protein-coding
MACS_peak_13306	chr2	150022954	150023850	+	Intergenic	IAPEz-int|LTR|ERVK	15911	NM_001145863	100271882		NM_001145863	ENSMUSG00000079009	Gm14139	OTTMUSG00000015769	predicted gene 14139	protein-coding
MACS_peak_13314	chr2	150482933	150483592	+	intron (NM_080575, intron 2 of 13)	intron (NM_080575, intron 2 of 13)	-9968	NR_040331	109344	Mm.440012	NR_040331	ENSMUSG00000087406	E130215H24Rik	-	RIKEN cDNA E130215H24 gene	ncRNA
MACS_peak_13317	chr2	150773320	150774301	+	intron (NM_207204, intron 17 of 23)	RLTR13B1|LTR|ERVK	38480	NM_001163476	69270	Mm.271603	NM_027014	ENSMUSG00000027454	Gins1	2810418N01Rik|Gins4|PSF1|mKIAA0186	GINS complex subunit 1 (Psf1 homolog)	protein-coding
MACS_peak_1332	chr1	147953999	147954455	+	Intergenic	IAPLTR3-int|LTR|ERVK	-388569	NM_153539	215378	Mm.441817	NM_153539	ENSMUSG00000035131	Brinp3	B830045N13Rik|Fam5c	bone morphogenetic protein/retinoic acid inducible neural specific 3	protein-coding
MACS_peak_13325	chr2	151319573	151320177	+	promoter-TSS (NM_001291074)	promoter-TSS (NM_001291074)	-43	NM_001291074	386649	Mm.419479	NM_198326	ENSMUSG00000027455	Nsfl1c	Munc-18c|Stxbp3a|p47	NSFL1 (p97) cofactor (p47)	protein-coding
MACS_peak_13326	chr2	151338152	151338571	+	Intergenic	Intergenic	18443	NM_198326	386649	Mm.419479	NM_198326	ENSMUSG00000027455	Nsfl1c	Munc-18c|Stxbp3a|p47	NSFL1 (p97) cofactor (p47)	protein-coding
MACS_peak_13327	chr2	151401380	151401958	+	intron (NM_145535, intron 1 of 8)	intron (NM_145535, intron 1 of 8)	3310	NM_145535	228765	Mm.32068	NM_145535	ENSMUSG00000027456	Sdcbp2	-	syndecan binding protein (syntenin) 2	protein-coding
MACS_peak_13328	chr2	151445840	151446388	+	intron (NM_198214, intron 2 of 5)	RLTR25A|LTR|ERVK	12215	NM_198214	241727	Mm.39312	NM_198214	ENSMUSG00000027457	Snph	6430515A01|AW045671|AW556958|AW743098|mKIAA0374	syntaphilin	protein-coding
MACS_peak_13329	chr2	151502079	151502597	+	Intergenic	Intergenic	-8069	NM_001276400	668929	Mm.473683	NM_001114677	ENSMUSG00000074704	Rad21l	Gm14160|MeiRAD21L|Rad21l1	RAD21-like (S. pombe)	protein-coding
MACS_peak_13332	chr2	151920997	151921415	+	3' UTR (NM_001160410, exon 2 of 2)	3' UTR (NM_001160410, exon 2 of 2)	-10054	NM_029688	76650	Mm.218639	NM_029688	ENSMUSG00000032802	Srxn1	1700127B04Rik|AI854065|AW488194|Npn3|Srx|Srx1|TX01	sulfiredoxin 1 homolog (S. cerevisiae)	protein-coding
MACS_peak_13333	chr2	152022927	152023450	+	Intergenic	Intergenic	-29388	NM_007788	12995	Mm.23692	NM_007788	ENSMUSG00000074698	Csnk2a1	Csnk2a1-rs4	casein kinase 2, alpha 1 polypeptide	protein-coding
MACS_peak_13335	chr2	152074849	152075324	+	intron (NM_007788, intron 1 of 12)	intron (NM_007788, intron 1 of 12)	22510	NM_007788	12995	Mm.23692	NM_007788	ENSMUSG00000074698	Csnk2a1	Csnk2a1-rs4	casein kinase 2, alpha 1 polypeptide	protein-coding
MACS_peak_13340	chr2	152223701	152224219	+	promoter-TSS (NM_011438)	promoter-TSS (NM_011438)	-178	NM_011438	20667	Mm.28424	NM_011438	ENSMUSG00000051817	Sox12	2010205A02Rik	SRY (sex determining region Y)-box 12	protein-coding
MACS_peak_13343	chr2	152552034	152552723	+	Intergenic	YREP_Mm|Unknown|Unknown	-9609	NM_010495	15901	Mm.444	NM_010495	ENSMUSG00000042745	Id1	AI323524|D2Wsu140e|Idb1|bHLHb24	inhibitor of DNA binding 1	protein-coding
MACS_peak_13347	chr2	152673214	152673696	+	promoter-TSS (NM_028109)	promoter-TSS (NM_028109)	-245	NM_001141975	72119	Mm.407737	NM_028109	ENSMUSG00000027469	Tpx2	2610005B21Rik|DIL2|REPP86|p100	TPX2, microtubule-associated protein homolog (Xenopus laevis)	protein-coding
MACS_peak_13348	chr2	152709898	152710456	+	intron (NM_001141977, intron 11 of 17)	intron (NM_001141977, intron 11 of 17)	19374	NR_049195	100885834		NR_049195	miRBase:MI0019190	Mir5622	mmu-mir-5622	microRNA mir-5622	ncRNA
MACS_peak_1335	chr1	148169970	148170386	+	Intergenic	RLTR9D|LTR|ERVK	-172618	NM_153539	215378	Mm.441817	NM_153539	ENSMUSG00000035131	Brinp3	B830045N13Rik|Fam5c	bone morphogenetic protein/retinoic acid inducible neural specific 3	protein-coding
MACS_peak_13351	chr2	152993603	152994499	+	intron (NM_133847, intron 1 of 17)	intron (NM_133847, intron 1 of 17)	7014	NM_133847	99237	Mm.330674	NM_133847	ENSMUSG00000068040	Tm9sf4	AA986553|AU045326|B930079E06|mKIAA0255	transmembrane 9 superfamily protein member 4	protein-coding
MACS_peak_13352	chr2	153172500	153173337	+	intron (NM_001039939, intron 1 of 11)	intron (NM_001039939, intron 1 of 11)	1043	NM_001039939	228790	Mm.330677	NM_001039939	ENSMUSG00000042548	Asxl1	mKIAA0978	additional sex combs like 1	protein-coding
MACS_peak_13353	chr2	153195988	153197250	+	intron (NM_001039939, intron 3 of 11)	intron (NM_001039939, intron 3 of 11)	24744	NM_001039939	228790	Mm.330677	NM_001039939	ENSMUSG00000042548	Asxl1	mKIAA0978	additional sex combs like 1	protein-coding
MACS_peak_13356	chr2	153435207	153435780	+	Intergenic	Intergenic	23024	NM_001195390	99311	Mm.294478	NM_133850	ENSMUSG00000056941	Commd7	2310010I22Rik|AW060956|mU3	COMM domain containing 7	protein-coding
MACS_peak_13358	chr2	153468709	153469323	+	Intergenic	Intergenic	-6169	NM_001003963	13436	Mm.89772	NM_010068	ENSMUSG00000027478	Dnmt3b	MmuIIIB	DNA methyltransferase 3B	protein-coding
MACS_peak_13364	chr2	154163524	154164282	+	intron (NM_025876, intron 13 of 13)	L1M5|LINE|L1	30923	NM_001025574	433492	Mm.330682	NM_001025574	ENSMUSG00000067996	Bpifb9b	5430413K10Rik|AI413838|OTTMUSG00000015915	BPI fold containing family B, member 9B	protein-coding
MACS_peak_13366	chr2	154198338	154199087	+	promoter-TSS (NM_025876)	promoter-TSS (NM_025876)	-257	NM_025876	66971	Mm.289427	NM_025876	ENSMUSG00000027487	Cdk5rap1	2310066P17Rik	CDK5 regulatory subunit associated protein 1	protein-coding
MACS_peak_13367	chr2	154249299	154249941	+	Intergenic	B2_Mm2|SINE|B2	-12600	NM_172860	12396	Mm.29914	NM_009823	ENSMUSG00000038533	Cbfa2t2	A430091M07|C330013D05Rik|Cbfa2t2h|MTGR1	core-binding factor, runt domain, alpha subunit 2, translocated to, 2 (human)	protein-coding
MACS_peak_13370	chr2	154253318	154254227	+	Intergenic	Intergenic	-8448	NM_172860	12396	Mm.29914	NM_009823	ENSMUSG00000038533	Cbfa2t2	A430091M07|C330013D05Rik|Cbfa2t2h|MTGR1	core-binding factor, runt domain, alpha subunit 2, translocated to, 2 (human)	protein-coding
MACS_peak_13383	chr2	154905388	154905961	+	Intergenic	L1MD|LINE|L1	-5441	NM_016661	269378	Mm.330692	NM_016661	ENSMUSG00000027597	Ahcy	AA987153|AL024110|CuBP|SAHH	S-adenosylhomocysteine hydrolase	protein-coding
MACS_peak_13384	chr2	154941004	154941824	+	Intergenic	Intergenic	-15599	NR_040634	100504268	Mm.410858	NR_040634	ENSMUSG00000087254	2310005A03Rik	-	RIKEN cDNA 2310005A03 gene	ncRNA
MACS_peak_13388	chr2	154966670	154968184	+	intron (NM_008395, intron 2 of 24)	intron (NM_008395, intron 2 of 24)	8210	NM_008395	16396	Mm.208286	NM_008395	ENSMUSG00000027598	Itch	6720481N21Rik|8030492O04Rik|A130065M08|AIP4|C230047C07Rik	itchy, E3 ubiquitin protein ligase	protein-coding
MACS_peak_13389	chr2	155047993	155048381	+	intron (NM_001243712, intron 25 of 25)	RLTR11B|LTR|ERVK	-14082	NR_111891	67068	Mm.23693	NM_025947	ENSMUSG00000047459	Dynlrb1	2010012N15Rik|2010320M17Rik|9430076K19Rik|AV124457|DNLC2A|Dncl2a|km23-1	dynein light chain roadblock-type 1	protein-coding
MACS_peak_13391	chr2	155134228	155134918	+	intron (NM_001004721, intron 7 of 11)	B3|SINE|B2	32473	NR_046364	66734	Mm.196239	NM_025735	ENSMUSG00000027602	Map1lc3a	1010001H21Rik|4922501H04Rik|LC3|LC3a	microtubule-associated protein 1 light chain 3 alpha	protein-coding
MACS_peak_13392	chr2	155141908	155142372	+	intron (NM_001004721, intron 6 of 11)	intron (NM_001004721, intron 6 of 11)	40040	NR_046364	66734	Mm.196239	NM_025735	ENSMUSG00000027602	Map1lc3a	1010001H21Rik|4922501H04Rik|LC3|LC3a	microtubule-associated protein 1 light chain 3 alpha	protein-coding
MACS_peak_13393	chr2	155182990	155183431	+	promoter-TSS (NM_001004721)	promoter-TSS (NM_001004721)	-50	NM_001004721	228812	Mm.5434	NM_001004721	ENSMUSG00000038383	Pigu	5430426F17Rik|BC028278|Cdc91l1	phosphatidylinositol glycan anchor biosynthesis, class U	protein-coding
MACS_peak_13396	chr2	155301110	155301667	+	Intergenic	Intergenic	-34869	NM_019825	56406	Mm.27592	NM_019825	ENSMUSG00000038369	Ncoa6	AIB3|ASC-2|ASC2|NRC|Ncoa7|PRIP|RAP250|mKIAA0181	nuclear receptor coactivator 6	protein-coding
MACS_peak_134	chr1	13074813	13075663	+	Intergenic	Intergenic	42006	NM_001081209	383491	Mm.309380	NM_001081209	ENSMUSG00000042414	Prdm14	-	PR domain containing 14	protein-coding
MACS_peak_13401	chr2	155517874	155518480	+	promoter-TSS (NM_001163452)	promoter-TSS (NM_001163452)	-57	NM_001163452	56407	Mm.268304	NM_019828	ENSMUSG00000038324	Trpc4ap	4833429F06Rik|D2Ertd113e|Trrp4ap|mFLJ00177|truss	transient receptor potential cation channel, subfamily C, member 4 associated protein	protein-coding
MACS_peak_13402	chr2	155650286	155650704	+	intron (NM_010579, intron 2 of 5)	intron (NM_010579, intron 2 of 5)	2166	NM_010579	16418	Mm.271674	NM_010579	ENSMUSG00000027613	Eif6	1110004P11|AA408895|CAB|Itgb4bp|eIF-6|imc-415|p27(BBP)|p27BBP	eukaryotic translation initiation factor 6	protein-coding
MACS_peak_13404	chr2	155772178	155772848	+	Intergenic	Intergenic	-1413	NM_008109	14563	Mm.4744	NM_008109	ENSMUSG00000038259	Gdf5	BMP-14|Cdmp-1|bp|brp	growth differentiation factor 5	protein-coding
MACS_peak_13405	chr2	155781528	155782230	+	promoter-TSS (NM_001130000)	promoter-TSS (NM_001130000)	-415	NM_001129999	16328	Mm.288729	NM_008383	ENSMUSG00000038241	Cep250	AW490617|B230210E21Rik|Cep2|Inmp	centrosomal protein 250	protein-coding
MACS_peak_13406	chr2	155788748	155789263	+	intron (NM_177217, intron 3 of 33)	intron (NM_177217, intron 3 of 33)	6711	NM_177217	16328	Mm.288729	NM_008383	ENSMUSG00000038241	Cep250	AW490617|B230210E21Rik|Cep2|Inmp	centrosomal protein 250	protein-coding
MACS_peak_13407	chr2	155932275	155932799	+	intron (NM_029397, intron 1 of 2)	intron (NM_029397, intron 1 of 2)	5164	NM_170598	75710	Mm.27660	NM_029397		Rbm12	5730420G12Rik|9430070C08Rik|AI852903|SWAN|mKIAA0765	RNA binding motif protein 12	protein-coding
MACS_peak_13408	chr2	155937683	155938123	+	promoter-TSS (NM_170590)	promoter-TSS (NM_170590)	-202	NM_170588	266692	Mm.27660	NM_170588	ENSMUSG00000074643	Cpne1	1810028N16Rik|mKIAA4108	copine I	protein-coding
MACS_peak_13409	chr2	155991761	155992391	+	intron (NM_133242, intron 6 of 16)	B1_Mus1|SINE|Alu	13240	NM_001291115	170791	Mm.392436	NM_133242	ENSMUSG00000027620	Rbm39	1500012C14Rik|2310040E03Rik|B330012G18Rik|C79248|R75070|Rnpc2|caper	RNA binding motif protein 39	protein-coding
MACS_peak_13411	chr2	156043388	156043917	+	intron (NM_172674, intron 1 of 17)	intron (NM_172674, intron 1 of 17)	21269	NM_172674	228829	Mm.427078	NM_172674	ENSMUSG00000038116	Phf20	6820402O20Rik	PHD finger protein 20	protein-coding
MACS_peak_13412	chr2	156061960	156062287	+	intron (NM_172674, intron 2 of 17)	PB1D9|SINE|Alu	39740	NM_172674	228829	Mm.427078	NM_172674	ENSMUSG00000038116	Phf20	6820402O20Rik	PHD finger protein 20	protein-coding
MACS_peak_13417	chr2	156372843	156373459	+	promoter-TSS (NM_026661)	promoter-TSS (NM_026661)	-161	NM_026661	68295	Mm.253648	NM_026661	ENSMUSG00000027628	Aar2	0610011L14Rik	AAR2 splicing factor homolog (S. cerevisiae)	protein-coding
MACS_peak_13420	chr2	156468650	156469019	+	intron (NM_001277187, intron 1 of 11)	intron (NM_001277187, intron 1 of 11)	29401	NM_001277186	228836	Mm.22094	NM_146128	ENSMUSG00000061689	Dlgap4	AI225853|BC024558|DAP-4|DAP4|SAPAP-4|Sapap4|WBP16	discs, large homolog-associated protein 4 (Drosophila)	protein-coding
MACS_peak_13423	chr2	156516271	156517053	+	intron (NM_001277187, intron 2 of 11)	intron (NM_001277187, intron 2 of 11)	29983	NR_040505	74846	Mm.443946	NR_040505	ENSMUSG00000086638	4930405A21Rik	-	RIKEN cDNA 4930405A21 gene	ncRNA
MACS_peak_13424	chr2	156611853	156612671	+	Intergenic	RLTR13D6|LTR|ERVK	11062	NM_172118	98932	Mm.271770	NM_172118	ENSMUSG00000067818	Myl9	AI327049|MLC20|Mylc2c|RLC-C	myosin, light polypeptide 9, regulatory	protein-coding
MACS_peak_13426	chr2	156817546	156818366	+	promoter-TSS (NM_013865)	promoter-TSS (NM_013865)	-109	NM_180956	29812	Mm.279256	NM_013865	ENSMUSG00000027634	Ndrg3	4833415O14Rik|AI747193|Ndr3	N-myc downstream regulated gene 3	protein-coding
MACS_peak_13428	chr2	157029477	157029933	+	intron (NM_001139516, intron 1 of 12)	intron (NM_001139516, intron 1 of 12)	565	NM_011249	19650	Mm.244671	NM_011249	ENSMUSG00000027641	Rbl1	AW547426|PRB1|p107	retinoblastoma-like 1 (p107)	protein-coding
MACS_peak_13430	chr2	157073891	157074456	+	intron (NM_001039557, intron 8 of 24)	intron (NM_001039557, intron 8 of 24)	-30661	NM_019642	20014	Mm.22130	NM_019642	ENSMUSG00000027642	Rpn2	1300012C06Rik|AV261018|Rpn-2	ribophorin II	protein-coding
MACS_peak_13431	chr2	157157727	157158267	+	intron (NM_010285, intron 3 of 4)	intron (NM_010285, intron 3 of 4)	14394	NM_010285	14601	Mm.389327	NM_010285	ENSMUSG00000027643	Ghrh	Ghrf	growth hormone releasing hormone	protein-coding
MACS_peak_13432	chr2	157201813	157202759	+	intron (NM_026968, intron 1 of 2)	L1M4|LINE|L1	8956	NM_026968	69161	Mm.228619	NM_026968	ENSMUSG00000063019	Manbal	1810024K12Rik|AI836500	mannosidase, beta A, lysosomal-like	protein-coding
MACS_peak_13435	chr2	157244422	157244975	+	Intergenic	MIRc|SINE|MIR	-5331	NM_009271	20779	Mm.22845	NM_009271	ENSMUSG00000027646	Src	AW259666|pp60c-src	Rous sarcoma oncogene	protein-coding
MACS_peak_13437	chr2	157397088	157397682	+	Intergenic	Intergenic	-5288	NM_016916	53619	Mm.480461	NM_016916	ENSMUSG00000067787	Blcap	AI462828|Bc10	bladder cancer associated protein homolog (human)	protein-coding
MACS_peak_13439	chr2	157422802	157423566	+	Intergenic	Intergenic	-31087	NM_016916	53619	Mm.480461	NM_016916	ENSMUSG00000067787	Blcap	AI462828|Bc10	bladder cancer associated protein homolog (human)	protein-coding
MACS_peak_13440	chr2	157430693	157431162	+	Intergenic	Intergenic	-38830	NM_016916	53619	Mm.480461	NM_016916	ENSMUSG00000067787	Blcap	AI462828|Bc10	bladder cancer associated protein homolog (human)	protein-coding
MACS_peak_13444	chr2	157665879	157667105	+	intron (NM_025680, intron 11 of 15)	intron (NM_025680, intron 11 of 15)	-73897	NM_198627	277432	Mm.441156	NM_198627	ENSMUSG00000037843	Vstm2l	Gm691	V-set and transmembrane domain containing 2-like	protein-coding
MACS_peak_13445	chr2	157738730	157739369	+	Intergenic	Intergenic	-1340	NM_198627	277432	Mm.441156	NM_198627	ENSMUSG00000037843	Vstm2l	Gm691	V-set and transmembrane domain containing 2-like	protein-coding
MACS_peak_13446	chr2	157783250	157784048	+	Intergenic	Intergenic	43260	NM_198627	277432	Mm.441156	NM_198627	ENSMUSG00000037843	Vstm2l	Gm691	V-set and transmembrane domain containing 2-like	protein-coding
MACS_peak_13447	chr2	157793608	157794161	+	Intergenic	Intergenic	41212	NM_029282	75425	Mm.29068	NM_029282	ENSMUSG00000027650	Tti1	2610036D13Rik|AI449463	TELO2 interacting protein 1	protein-coding
MACS_peak_13448	chr2	157796428	157796887	+	Intergenic	Intergenic	38439	NM_029282	75425	Mm.29068	NM_029282	ENSMUSG00000027650	Tti1	2610036D13Rik|AI449463	TELO2 interacting protein 1	protein-coding
MACS_peak_1345	chr1	150921692	150922406	+	Intergenic	ORR1C1|LTR|MaLR	886365	NM_008869	18783	Mm.4186	NM_008869	ENSMUSG00000056220	Pla2g4a	Pla2g4|cPLA2|cPLA2alpha	phospholipase A2, group IVA (cytosolic, calcium-dependent)	protein-coding
MACS_peak_13452	chr2	158372496	158372927	+	intron (NM_001145015, intron 12 of 14)	intron (NM_001145015, intron 12 of 14)	34179	NM_001145015	545481	Mm.125371	NM_001145015	ENSMUSG00000074625	Arhgap40	C20orf95|Gm14203|OTTMUSG00000015933	Rho GTPase activating protein 40	protein-coding
MACS_peak_13453	chr2	158396037	158396421	+	Intergenic	Intergenic	40230	NR_040358	100045469	Mm.143404	NR_040358	ENSMUSG00000086496	Gm14204	OTTMUSG00000015935	predicted gene 14204	ncRNA
MACS_peak_13458	chr2	158621587	158622200	+	intron (NM_145742, intron 1 of 20)	intron (NM_145742, intron 1 of 20)	1350	NM_001291144	71715	Mm.315652	NM_145742	ENSMUSG00000027655	Dhx35	1200009D07Rik|Ddx35	DEAH (Asp-Glu-Ala-His) box polypeptide 35	protein-coding
MACS_peak_1346	chr1	150944384	150945001	+	Intergenic	BGLII|LTR|ERVK	863722	NM_008869	18783	Mm.4186	NM_008869	ENSMUSG00000056220	Pla2g4a	Pla2g4|cPLA2|cPLA2alpha	phospholipase A2, group IVA (cytosolic, calcium-dependent)	protein-coding
MACS_peak_13460	chr2	158894849	158895347	+	Intergenic	Intergenic	274555	NM_001291144	71715	Mm.315652	NM_145742	ENSMUSG00000027655	Dhx35	1200009D07Rik|Ddx35	DEAH (Asp-Glu-Ala-His) box polypeptide 35	protein-coding
MACS_peak_13461	chr2	158912507	158913121	+	Intergenic	Intergenic	292271	NM_001291144	71715	Mm.315652	NM_145742	ENSMUSG00000027655	Dhx35	1200009D07Rik|Ddx35	DEAH (Asp-Glu-Ala-His) box polypeptide 35	protein-coding
MACS_peak_13462	chr2	159060594	159061260	+	Intergenic	Intergenic	440384	NM_001291144	71715	Mm.315652	NM_145742	ENSMUSG00000027655	Dhx35	1200009D07Rik|Ddx35	DEAH (Asp-Glu-Ala-His) box polypeptide 35	protein-coding
MACS_peak_13464	chr2	159244010	159244762	+	Intergenic	Intergenic	-528691	NR_040498	71081	Mm.383491	NR_040498	ENSMUSG00000085198	4933416E03Rik	-	RIKEN cDNA 4933416E03 gene	ncRNA
MACS_peak_13465	chr2	159583060	159583480	+	Intergenic	LTRIS2|LTR|ERV1	-189807	NR_040498	71081	Mm.383491	NR_040498	ENSMUSG00000085198	4933416E03Rik	-	RIKEN cDNA 4933416E03 gene	ncRNA
MACS_peak_13468	chr2	160185824	160186526	+	Intergenic	Intergenic	6626	NM_010658	16658	Mm.330745	NM_010658	ENSMUSG00000074622	Mafb	Kreisler|Krml|Krml1|kr	v-maf musculoaponeurotic fibrosarcoma oncogene family, protein B (avian)	protein-coding
MACS_peak_13473	chr2	160481748	160482560	+	intron (NM_009408, intron 2 of 20)	RLTR12B|LTR|ERVK	10521	NM_009408	21969	Mm.217233	NM_009408	ENSMUSG00000070544	Top1	AI467334|D130064I21Rik|Top-1	topoisomerase (DNA) I	protein-coding
MACS_peak_13475	chr2	160569734	160570177	+	intron (NM_021280, intron 2 of 33)	intron (NM_021280, intron 2 of 33)	12909	NM_021280	18803	Mm.44463	NM_021280	ENSMUSG00000016933	Plcg1	AI894140|Cded|Plc-1|Plc-gamma1|Plcg-1	phospholipase C, gamma 1	protein-coding
MACS_peak_13476	chr2	160712871	160713624	+	promoter-TSS (NM_001199118)	promoter-TSS (NM_001199118)	-657	NM_001199118	64899	Mm.292111	NM_022883	ENSMUSG00000027412	Lpin3	9130206L11Rik|AA438110|AV236139|mKIAA4023	lipin 3	protein-coding
MACS_peak_13477	chr2	160892053	160892611	+	intron (NM_173368, intron 1 of 36)	intron (NM_173368, intron 1 of 36)	42460	NM_173368	71389	Mm.122738	NM_173368	ENSMUSG00000057133	Chd6	5430439G14Rik|6330406J24Rik|CHD-6	chromodomain helicase DNA binding protein 6	protein-coding
MACS_peak_13480	chr2	161022483	161022996	+	Intergenic	Intergenic	-87947	NM_173368	71389	Mm.122738	NM_173368	ENSMUSG00000057133	Chd6	5430439G14Rik|6330406J24Rik|CHD-6	chromodomain helicase DNA binding protein 6	protein-coding
MACS_peak_13483	chr2	162109004	162109417	+	intron (NM_001291149, intron 2 of 30)	intron (NM_001291149, intron 2 of 30)	-107339	NR_040617	77645	Mm.447752	NR_040617	ENSMUSG00000084919	Ptprtos	C330008G21Rik	protein tyrosine phosphatase, receptor type T, opposite strand	ncRNA
MACS_peak_13485	chr2	162484524	162485161	+	intron (NM_001291149, intron 1 of 30)	intron (NM_001291149, intron 1 of 30)	2041	NM_001291151	19281	Mm.235807	NM_021464	ENSMUSG00000053141	Ptprt	R-PTP-T|RPTP-rfo|RPTP-rho|RPTPmam4|RPTPrho|mKIAA0283|mRPTPrho	protein tyrosine phosphatase, receptor type, T	protein-coding
MACS_peak_13487	chr2	162857035	162858840	+	intron (NM_172150, intron 8 of 12)	intron (NM_172150, intron 8 of 12)	14729	NM_172150	245866	Mm.34034	NM_172150	ENSMUSG00000017858	Ift52	BC037708|NGD5	intraflagellar transport 52	protein-coding
MACS_peak_13491	chr2	162891915	162892430	+	intron (NM_008652, intron 5 of 13)	B3|SINE|B2	-1654	NR_105970	102465607		NR_105970		Mir7003	mmu-mir-7003	microRNA mir-7003	ncRNA
MACS_peak_13496	chr2	163131480	163132231	+	intron (NM_001098799, intron 3 of 8)	RLTR13B4|LTR|ERVK	80665	NM_001098799	269389	Mm.207709	NM_001098799	ENSMUSG00000074607	Tox2	AI851523|AV026525|BI987407|Gcx1|RxHMG1	TOX high mobility group box family member 2	protein-coding
MACS_peak_13501	chr2	163296803	163297246	+	intron (NM_173397, intron 1 of 1)	intron (NM_173397, intron 1 of 1)	-1257	NR_028122	69517	Mm.395343	NR_028122	ENSMUSG00000053353	2310001K24Rik	-	RIKEN cDNA 2310001K24 gene	ncRNA
MACS_peak_13505	chr2	163896958	163897522	+	promoter-TSS (NM_025996)	promoter-TSS (NM_025996)	-335	NM_001291155	67145	Mm.23173	NM_025996	ENSMUSG00000018322	Tomm34	2610100K07Rik|TOM34	translocase of outer mitochondrial membrane 34	protein-coding
MACS_peak_13515	chr2	164609442	164609987	+	Intergenic	B1_Mur1|SINE|Alu	-1807	NM_133924	101113	Mm.295647	NM_133924		Snx21	5730407K14Rik|AI481716	sorting nexin family member 21	protein-coding
MACS_peak_13518	chr2	164658995	164659399	+	promoter-TSS (NM_008906)	promoter-TSS (NM_008906)	-76	NM_008906	19025	Mm.359633	NM_008906	ENSMUSG00000017760	Ctsa	AU019505|PPCA|Ppgb	cathepsin A	protein-coding
MACS_peak_13523	chr2	164705232	164705992	+	intron (NM_146129, intron 1 of 16)	CpG	744	NM_146129	228866	Mm.241134	NM_146129		Pcif1	2310022K11Rik|C20orf67|F730014I05Rik	PDX1 C-terminal inhibiting factor 1	protein-coding
MACS_peak_13524	chr2	164768168	164768662	+	Intergenic	Intergenic	-5304	NM_013599	17395	Mm.4406	NM_013599	ENSMUSG00000017737	Mmp9	AW743869|B/MMP9|Clg4b|MMP-9|pro-MMP-9	matrix metallopeptidase 9	protein-coding
MACS_peak_13529	chr2	164860297	164861161	+	promoter-TSS (NM_144892)	promoter-TSS (NM_144892)	-450	NM_144892	228869	Mm.233080	NM_144892	ENSMUSG00000039804	Ncoa5	CIA	nuclear receptor coactivator 5	protein-coding
MACS_peak_13530	chr2	164985810	164986265	+	intron (NM_174988, intron 3 of 11)	B2_Mm2|SINE|B2	-69787	NR_033448	72211	Mm.482899	NR_033448	ENSMUSG00000078935	1700025C18Rik	-	RIKEN cDNA 1700025C18 gene	ncRNA
MACS_peak_13531	chr2	165281213	165281778	+	intron (NM_054055, intron 1 of 12)	MIRc|SINE|MIR	17202	NM_054055	114644	Mm.250738	NM_054055	ENSMUSG00000018459	Slc13a3	NaDC-3|NaDC3|SDCT2	solute carrier family 13 (sodium-dependent dicarboxylate transporter), member 3	protein-coding
MACS_peak_13538	chr2	165634962	165636400	+	intron (NM_001291158, intron 15 of 23)	intron (NM_001291158, intron 15 of 23)	47992	NM_001252585	228880	Mm.227598	NM_027230	ENSMUSG00000039671	Zmynd8	1110013E22Rik|2010005I16Rik|3632413B07Rik|AI316811|AL024039|Prkcbp1|RACK7	zinc finger, MYND-type containing 8	protein-coding
MACS_peak_13539	chr2	165636719	165637520	+	intron (NM_001291158, intron 15 of 23)	intron (NM_001291158, intron 15 of 23)	46554	NM_001252585	228880	Mm.227598	NM_027230	ENSMUSG00000039671	Zmynd8	1110013E22Rik|2010005I16Rik|3632413B07Rik|AI316811|AL024039|Prkcbp1|RACK7	zinc finger, MYND-type containing 8	protein-coding
MACS_peak_1354	chr1	152170221	152170599	+	intron (NR_040603, intron 2 of 3)	RLTR13C1|LTR|ERVK	3863	NM_001159730	20028	Mm.440883	NM_024458	ENSMUSG00000006007	Pdc	Rpr-1|Rpr1	phosducin	protein-coding
MACS_peak_13540	chr2	165657518	165658025	+	intron (NM_001291158, intron 11 of 23)	intron (NM_001291158, intron 11 of 23)	25902	NM_001252585	228880	Mm.227598	NM_027230	ENSMUSG00000039671	Zmynd8	1110013E22Rik|2010005I16Rik|3632413B07Rik|AI316811|AL024039|Prkcbp1|RACK7	zinc finger, MYND-type containing 8	protein-coding
MACS_peak_13541	chr2	165658793	165659213	+	intron (NM_001291158, intron 10 of 23)	intron (NM_001291158, intron 10 of 23)	24670	NM_001252585	228880	Mm.227598	NM_027230	ENSMUSG00000039671	Zmynd8	1110013E22Rik|2010005I16Rik|3632413B07Rik|AI316811|AL024039|Prkcbp1|RACK7	zinc finger, MYND-type containing 8	protein-coding
MACS_peak_13542	chr2	165682683	165683528	+	intron (NM_001291158, intron 2 of 23)	intron (NM_001291158, intron 2 of 23)	568	NM_001252585	228880	Mm.227598	NM_027230	ENSMUSG00000039671	Zmynd8	1110013E22Rik|2010005I16Rik|3632413B07Rik|AI316811|AL024039|Prkcbp1|RACK7	zinc finger, MYND-type containing 8	protein-coding
MACS_peak_13544	chr2	165723632	165724298	+	Intergenic	Intergenic	-13627	NM_001252587	228880	Mm.227598	NM_027230	ENSMUSG00000039671	Zmynd8	1110013E22Rik|2010005I16Rik|3632413B07Rik|AI316811|AL024039|Prkcbp1|RACK7	zinc finger, MYND-type containing 8	protein-coding
MACS_peak_13545	chr2	165724936	165726174	+	Intergenic	Intergenic	-15217	NM_001252587	228880	Mm.227598	NM_027230	ENSMUSG00000039671	Zmynd8	1110013E22Rik|2010005I16Rik|3632413B07Rik|AI316811|AL024039|Prkcbp1|RACK7	zinc finger, MYND-type containing 8	protein-coding
MACS_peak_13547	chr2	165739532	165740384	+	Intergenic	Intergenic	-29620	NM_001252587	228880	Mm.227598	NM_027230	ENSMUSG00000039671	Zmynd8	1110013E22Rik|2010005I16Rik|3632413B07Rik|AI316811|AL024039|Prkcbp1|RACK7	zinc finger, MYND-type containing 8	protein-coding
MACS_peak_13552	chr2	165819841	165820524	+	intron (NM_008679, intron 1 of 22)	intron (NM_008679, intron 1 of 22)	2045	NM_008679	17979	Mm.469663	NM_008679	ENSMUSG00000027678	Ncoa3	2010305B15Rik|AW321064|Actr|Aib1|KAT13B|Rac3|Src3|Tram-1|Tram1|bHLHe42|p/Cip|pCip	nuclear receptor coactivator 3	protein-coding
MACS_peak_13554	chr2	165839372	165840018	+	intron (NM_008679, intron 1 of 22)	intron (NM_008679, intron 1 of 22)	21558	NM_008679	17979	Mm.469663	NM_008679	ENSMUSG00000027678	Ncoa3	2010305B15Rik|AW321064|Actr|Aib1|KAT13B|Rac3|Src3|Tram-1|Tram1|bHLHe42|p/Cip|pCip	nuclear receptor coactivator 3	protein-coding
MACS_peak_13555	chr2	165982421	165983361	+	Intergenic	Intergenic	-1708	NM_028072	72043	Mm.1011	NM_028072	ENSMUSG00000006800	Sulf2	2010004N24Rik|AU020235|MSulf-2|mKIAA1247	sulfatase 2	protein-coding
MACS_peak_13556	chr2	165995779	165996307	+	Intergenic	Charlie5|DNA|MER1_type	-14860	NM_028072	72043	Mm.1011	NM_028072	ENSMUSG00000006800	Sulf2	2010004N24Rik|AU020235|MSulf-2|mKIAA1247	sulfatase 2	protein-coding
MACS_peak_13558	chr2	166036649	166037486	+	Intergenic	MTC|LTR|MaLR	-55884	NM_028072	72043	Mm.1011	NM_028072	ENSMUSG00000006800	Sulf2	2010004N24Rik|AU020235|MSulf-2|mKIAA1247	sulfatase 2	protein-coding
MACS_peak_1356	chr1	152326472	152327284	+	Intergenic	LTRIS2|LTR|ERV1	-13583	NM_001110146	96875	Mm.174256	NM_021400	ENSMUSG00000006014	Prg4	CACP|DOL54|JCAP|MSF|SZP|lubricin	proteoglycan 4 (megakaryocyte stimulating factor, articular superficial zone protein)	protein-coding
MACS_peak_13562	chr2	166155325	166155793	+	Intergenic	Intergenic	56151	NR_033467	670775	Mm.384326	NR_033467	ENSMUSG00000084840	Gm11468	OTTMUSG00000001131	predicted gene 11468	ncRNA
MACS_peak_13565	chr2	166243684	166244669	+	Intergenic	Intergenic	-28775	NR_015558	319684	Mm.399746	NR_015558		5031425F14Rik	-	RIKEN cDNA 5031425F14 gene	ncRNA
MACS_peak_13567	chr2	166337756	166338531	+	Intergenic	Intergenic	65192	NR_015558	319684	Mm.399746	NR_015558		5031425F14Rik	-	RIKEN cDNA 5031425F14 gene	ncRNA
MACS_peak_13568	chr2	166348512	166349119	+	Intergenic	MER113|DNA|MER1_type	75864	NR_015558	319684	Mm.399746	NR_015558		5031425F14Rik	-	RIKEN cDNA 5031425F14 gene	ncRNA
MACS_peak_13571	chr2	166555587	166556464	+	Intergenic	Intergenic	-16693	NM_177782	277360	Mm.34420	NM_177782	ENSMUSG00000039621	Prex1	G630042G04|P-REX1|Setd6	phosphatidylinositol-3,4,5-trisphosphate-dependent Rac exchange factor 1	protein-coding
MACS_peak_13573	chr2	166618884	166619524	+	promoter-TSS (NM_023815)	promoter-TSS (NM_023815)	-63	NM_023815	76367	Mm.330796	NM_023815	ENSMUSG00000042854	Trp53rk	2810408M09Rik|4933401B08Rik|5630401H01Rik|Nori-2|PRPK|Tp53rk|Trp53tk|mNori-2p	transformation related protein 53 regulating kinase	protein-coding
MACS_peak_13575	chr2	166716899	166717437	+	intron (NM_001085495, intron 36 of 38)	intron (NM_001085495, intron 36 of 38)	-14428	NM_023565	110750	Mm.22417	NM_023565	ENSMUSG00000002718	Cse1l	2610100P18Rik|AA407533|Capts|Cas|Xpo2	chromosome segregation 1-like (S. cerevisiae)	protein-coding
MACS_peak_13576	chr2	166839937	166840587	+	promoter-TSS (NM_153065)	promoter-TSS (NM_153065)	-551	NM_153065	228889	Mm.295031	NM_153065	ENSMUSG00000017999	Ddx27	C86129	DEAD (Asp-Glu-Ala-Asp) box polypeptide 27	protein-coding
MACS_peak_13577	chr2	166884032	166884779	+	intron (NM_001033196, intron 2 of 13)	B1_Mus1|SINE|Alu	-4029	NM_001081005	68949	Mm.391959	NM_001081005	ENSMUSG00000074578	1500012F01Rik	Zfas1	RIKEN cDNA 1500012F01 gene	protein-coding
MACS_peak_13578	chr2	166888479	166889165	+	promoter-TSS (NM_001033196)	promoter-TSS (NM_001033196)	-307	NM_001033196	98999	Mm.297074	NM_001033196	ENSMUSG00000039501	Znfx1	AI481105	zinc finger, NFX1-type containing 1	protein-coding
MACS_peak_13581	chr2	166897301	166898596	+	Intergenic	Intergenic	7155	NR_028540	100217443		NR_028540		Snord12	MBII-99	small nucleolar RNA, C/D box 12	snoRNA
MACS_peak_13582	chr2	166913336	166913710	+	Intergenic	Intergenic	22730	NR_028540	100217443		NR_028540		Snord12	MBII-99	small nucleolar RNA, C/D box 12	snoRNA
MACS_peak_13585	chr2	167070510	167070930	+	Intergenic	B3A|SINE|B2	-4683	NM_008968	19223	Mm.2339	NM_008968	ENSMUSG00000017969	Ptgis	Cyp8|Cyp8a1|Pgis	prostaglandin I2 (prostacyclin) synthase	protein-coding
MACS_peak_13586	chr2	167091448	167092730	+	Intergenic	RLTR17|LTR|ERVK	-26052	NM_008968	19223	Mm.2339	NM_008968	ENSMUSG00000017969	Ptgis	Cyp8|Cyp8a1|Pgis	prostaglandin I2 (prostacyclin) synthase	protein-coding
MACS_peak_13588	chr2	167150016	167150690	+	intron (NM_019835, intron 1 of 8)	intron (NM_019835, intron 1 of 8)	24325	NM_019835	56336	Mm.200886	NM_019835	ENSMUSG00000017929	B4galt5	9430078I07Rik|AW049941|AW539721	UDP-Gal:betaGlcNAc beta 1,4-galactosyltransferase, polypeptide 5	protein-coding
MACS_peak_13589	chr2	167151964	167152606	+	intron (NM_019835, intron 1 of 8)	intron (NM_019835, intron 1 of 8)	22393	NM_019835	56336	Mm.200886	NM_019835	ENSMUSG00000017929	B4galt5	9430078I07Rik|AW049941|AW539721	UDP-Gal:betaGlcNAc beta 1,4-galactosyltransferase, polypeptide 5	protein-coding
MACS_peak_13592	chr2	167322642	167323281	+	intron (NM_030743, intron 1 of 7)	B3|SINE|B2	-4587	NM_170756	263876	Mm.34342	NM_170756	ENSMUSG00000047030	Spata2	AI504642|mKIAA0757	spermatogenesis associated 2	protein-coding
MACS_peak_1360	chr1	152913863	152914351	+	Intergenic	B2_Mm2|SINE|B2	-71057	NR_038011	402734	Mm.337666	NR_038011		C730036E19Rik	-	RIKEN cDNA C730036E19 gene	ncRNA
MACS_peak_13600	chr2	167767909	167768477	+	intron (NM_011201, intron 1 of 8)	intron (NM_011201, intron 1 of 8)	10366	NM_011201	19246	Mm.277916	NM_011201	ENSMUSG00000027540	Ptpn1	PTP-1B|PTP-HA2|PTP1B	protein tyrosine phosphatase, non-receptor type 1	protein-coding
MACS_peak_13601	chr2	167838543	167839062	+	Intergenic	Intergenic	-2709	NM_001080708	69553	Mm.68454	NM_001080708	ENSMUSG00000074577	Fam65c	2310033K02Rik|Gm124	family with sequence similarity 65, member C	protein-coding
MACS_peak_13607	chr2	168021230	168021791	+	intron (NM_009628, intron 1 of 3)	intron (NM_009628, intron 1 of 3)	11052	NM_009628	11538	Mm.201322	NM_009628	ENSMUSG00000051149	Adnp	AA589558|mKIAA0784	activity-dependent neuroprotective protein	protein-coding
MACS_peak_13609	chr2	168032547	168033244	+	promoter-TSS (NM_009628)	promoter-TSS (NM_009628)	-333	NM_009628	11538	Mm.201322	NM_009628	ENSMUSG00000051149	Adnp	AA589558|mKIAA0784	activity-dependent neuroprotective protein	protein-coding
MACS_peak_13610	chr2	168039343	168040211	+	intron (NM_010072, intron 6 of 8)	intron (NM_010072, intron 6 of 8)	-7215	NM_009628	11538	Mm.201322	NM_009628	ENSMUSG00000051149	Adnp	AA589558|mKIAA0784	activity-dependent neuroprotective protein	protein-coding
MACS_peak_13611	chr2	168058553	168059155	+	Intergenic	B1_Mus2|SINE|Alu	2732	NM_001160330	69372	Mm.482182	NM_001160330	ENSMUSG00000074576	Mocs3	1700020H17Rik|Uba4	molybdenum cofactor synthesis 3	protein-coding
MACS_peak_13614	chr2	168351114	168351607	+	intron (NM_001037178, intron 5 of 6)	intron (NM_001037178, intron 5 of 6)	64505	NM_001291178	18019	Mm.116802	NM_010899	ENSMUSG00000027544	Nfatc2	AI607462|NF-ATc2|NF-ATp|NFAT1|NFAT1-D|Nfatp	nuclear factor of activated T cells, cytoplasmic, calcineurin dependent 2	protein-coding
MACS_peak_13618	chr2	168517161	168517695	+	intron (NM_001289446, intron 4 of 27)	intron (NM_001289446, intron 4 of 27)	42411	NM_001289445	11981	Mm.330819	NM_015731	ENSMUSG00000027546	Atp9a	IIa	ATPase, class II, type 9A	protein-coding
MACS_peak_1362	chr1	153067163	153067600	+	Intergenic	RLTR9D|LTR|ERVK	82217	NR_038011	402734	Mm.337666	NR_038011		C730036E19Rik	-	RIKEN cDNA C730036E19 gene	ncRNA
MACS_peak_13621	chr2	168586336	168587053	+	intron (NM_175303, intron 1 of 3)	intron (NM_175303, intron 1 of 3)	6007	NM_201395	99377	Mm.434054	NM_175303	ENSMUSG00000027547	Sall4	5730441M18Rik|AA407717|AL022809|AW536104|C330011P20Rik|C78083|C78563|Tex20	sal-like 4 (Drosophila)	protein-coding
MACS_peak_13627	chr2	168755128	168755515	+	intron (NM_009564, intron 5 of 5)	Charlie4a|DNA|MER1_type	25766	NM_009564	22722	Mm.2095	NM_009564	ENSMUSG00000027551	Zfp64	-	zinc finger protein 64	protein-coding
MACS_peak_13629	chr2	168781104	168781886	+	promoter-TSS (NM_009564)	promoter-TSS (NM_009564)	-408	NM_009564	22722	Mm.2095	NM_009564	ENSMUSG00000027551	Zfp64	-	zinc finger protein 64	protein-coding
MACS_peak_1363	chr1	153082588	153082994	+	Intergenic	Intergenic	97627	NR_038011	402734	Mm.337666	NR_038011		C730036E19Rik	-	RIKEN cDNA C730036E19 gene	ncRNA
MACS_peak_13635	chr2	169114333	169115014	+	Intergenic	Intergenic	310904	NR_040326	75508	Mm.271256	NR_040326	ENSMUSG00000086348	1700017J07Rik	-	RIKEN cDNA 1700017J07 gene	ncRNA
MACS_peak_13639	chr2	169713290	169713979	+	3' UTR (NM_080455, exon 2 of 2)	3' UTR (NM_080455, exon 2 of 2)	182537	NR_033634	100043910	Mm.468546	NR_033632	ENSMUSG00000097065	A630075F10Rik	4831414D02|Gm4722	RIKEN cDNA A630075F10 gene	ncRNA
MACS_peak_1364	chr1	153140503	153141231	+	Intergenic	Intergenic	-50761	NM_001039512	117198	Mm.33764	NM_028582	ENSMUSG00000023150	Ivns1abp	1190004M08Rik|1700126I16Rik|AA960440|HSPC068|ND1|NS-1|NS1-BP|Nd1-L|Nd1-S|mKIAA0850	influenza virus NS1A binding protein	protein-coding
MACS_peak_13640	chr2	169735918	169736590	+	Intergenic	MER58A|DNA|MER1_type	159917	NR_033634	100043910	Mm.468546	NR_033632	ENSMUSG00000097065	A630075F10Rik	4831414D02|Gm4722	RIKEN cDNA A630075F10 gene	ncRNA
MACS_peak_13641	chr2	169740854	169741369	+	Intergenic	Intergenic	155060	NR_033634	100043910	Mm.468546	NR_033632	ENSMUSG00000097065	A630075F10Rik	4831414D02|Gm4722	RIKEN cDNA A630075F10 gene	ncRNA
MACS_peak_13646	chr2	169872107	169872476	+	Intergenic	MTC|LTR|MaLR	23880	NR_033634	100043910	Mm.468546	NR_033632	ENSMUSG00000097065	A630075F10Rik	4831414D02|Gm4722	RIKEN cDNA A630075F10 gene	ncRNA
MACS_peak_13647	chr2	169898328	169898996	+	Intergenic	Intergenic	-2384	NR_033632	100043910	Mm.468546	NR_033632	ENSMUSG00000097065	A630075F10Rik	4831414D02|Gm4722	RIKEN cDNA A630075F10 gene	ncRNA
MACS_peak_13649	chr2	169999532	170000210	+	Intergenic	Intergenic	-31696	NM_001159683	228913	Mm.22858	NM_001033299	ENSMUSG00000052056	Zfp217	4933431C08Rik|AW987152|Gm562|ZABC1|Znf217	zinc finger protein 217	protein-coding
MACS_peak_1365	chr1	153237030	153237671	+	intron (NM_025819, intron 14 of 19)	B3|SINE|B2	38215	NM_025819	66875	Mm.290905	NM_025819	ENSMUSG00000052748	Swt1	1200016B10Rik|C1orf26	SWT1 RNA endoribonuclease homolog (S. cerevisiae)	protein-coding
MACS_peak_13651	chr2	170033343	170033865	+	Intergenic	B3A|SINE|B2	-65429	NM_001159683	228913	Mm.22858	NM_001033299	ENSMUSG00000052056	Zfp217	4933431C08Rik|AW987152|Gm562|ZABC1|Znf217	zinc finger protein 217	protein-coding
MACS_peak_13656	chr2	170180301	170180805	+	intron (NM_029815, intron 11 of 12)	MLT1B|LTR|MaLR	-1308	NR_040610	73303	Mm.443297	NR_040610	ENSMUSG00000086999	Bcas1os2	1700040N02Rik	breast carcinoma amplified sequence 1, opposite strand 2	ncRNA
MACS_peak_13659	chr2	170336337	170336961	+	promoter-TSS (NM_001110152)	promoter-TSS (NM_001110152)	-81	NM_001110152	109054	Mm.28808	NM_001013369	ENSMUSG00000052033	Pfdn4	0610025M10Rik|1810063B06Rik|C-1|C1|Pfd4	prefoldin 4	protein-coding
MACS_peak_1366	chr1	153273974	153274550	+	intron (NM_025819, intron 1 of 19)	B3A|SINE|B2	1303	NM_025819	66875	Mm.290905	NM_025819	ENSMUSG00000052748	Swt1	1200016B10Rik|C1orf26	SWT1 RNA endoribonuclease homolog (S. cerevisiae)	protein-coding
MACS_peak_13660	chr2	170355250	170356263	+	Intergenic	Intergenic	-18329	NR_040367	100502946	Mm.421284	NR_040367	ENSMUSG00000085495	Gm16796	-	predicted gene, 16796	ncRNA
MACS_peak_13662	chr2	170430437	170430893	+	Intergenic	Intergenic	-3148	NR_027825	67637	Mm.158163	NM_026287	ENSMUSG00000043583	4930470P17Rik	-	RIKEN cDNA 4930470P17 gene	ncRNA
MACS_peak_13663	chr2	170558997	170559482	+	intron (NM_029761, intron 1 of 7)	intron (NM_029761, intron 1 of 7)	1932	NM_001163686	76829	Mm.41633	NM_029761	ENSMUSG00000027560	Dok5	2700055C10Rik	docking protein 5	protein-coding
MACS_peak_13664	chr2	170597499	170598374	+	intron (NM_029761, intron 1 of 7)	intron (NM_029761, intron 1 of 7)	40629	NM_001163686	76829	Mm.41633	NM_029761	ENSMUSG00000027560	Dok5	2700055C10Rik	docking protein 5	protein-coding
MACS_peak_13665	chr2	170737884	170738485	+	Intergenic	Intergenic	180877	NM_001163686	76829	Mm.41633	NM_029761	ENSMUSG00000027560	Dok5	2700055C10Rik	docking protein 5	protein-coding
MACS_peak_13666	chr2	170810987	170811336	+	Intergenic	Intergenic	253854	NM_001163686	76829	Mm.41633	NM_029761	ENSMUSG00000027560	Dok5	2700055C10Rik	docking protein 5	protein-coding
MACS_peak_13675	chr2	171704460	171705344	+	Intergenic	RLTR13D6|LTR|ERVK	83397	NR_040509	75655	Mm.396203	NR_040509	ENSMUSG00000086823	1700028P15Rik	-	RIKEN cDNA 1700028P15 gene	ncRNA
MACS_peak_13680	chr2	172084448	172084962	+	Intergenic	Intergenic	10713	NM_008561	17201	Mm.57183	NM_008561	ENSMUSG00000038537	Mc3r	MC3-R	melanocortin 3 receptor	protein-coding
MACS_peak_13683	chr2	172218697	172219243	+	promoter-TSS (NM_001276422)	promoter-TSS (NM_001276422)	-324	NM_001080820	320664	Mm.210195	NM_001033538	ENSMUSG00000074570	Cass4	F730031O20Rik	Cas scaffolding protein family member 4	protein-coding
MACS_peak_13684	chr2	172303213	172303962	+	Intergenic	Intergenic	5533	NM_029608	76426	Mm.46148	NM_029608	ENSMUSG00000027505	Fam209	1700029J11Rik	family with sequence similarity 209	protein-coding
MACS_peak_13686	chr2	172341837	172342784	+	Intergenic	Intergenic	-32783	NM_009335	21420	Mm.3629	NM_009335	ENSMUSG00000028640	Tfap2c	AA409384|AP2gamma|Ap-2.2|Stra2|Tcfap2c	transcription factor AP-2, gamma	protein-coding
MACS_peak_13689	chr2	172369985	172370468	+	Intergenic	Intergenic	-4867	NM_009335	21420	Mm.3629	NM_009335	ENSMUSG00000028640	Tfap2c	AA409384|AP2gamma|Ap-2.2|Stra2|Tcfap2c	transcription factor AP-2, gamma	protein-coding
MACS_peak_1369	chr1	153362583	153363265	+	Intergenic	RMER1B|Other|Other	-14971	NM_011277	19821	Mm.474038	NM_011277	ENSMUSG00000026484	Rnf2	AI326319|AI450156|AU019207|Ring1B|dinG	ring finger protein 2	protein-coding
MACS_peak_13692	chr2	172402547	172403359	+	Intergenic	Intergenic	26462	NM_001159696	21420	Mm.3629	NM_009335	ENSMUSG00000028640	Tfap2c	AA409384|AP2gamma|Ap-2.2|Stra2|Tcfap2c	transcription factor AP-2, gamma	protein-coding
MACS_peak_13693	chr2	172444434	172445002	+	Intergenic	Intergenic	68227	NM_001159696	21420	Mm.3629	NM_009335	ENSMUSG00000028640	Tfap2c	AA409384|AP2gamma|Ap-2.2|Stra2|Tcfap2c	transcription factor AP-2, gamma	protein-coding
MACS_peak_13694	chr2	172535911	172536669	+	Intergenic	RMER1A|Other|Other	159799	NM_001159696	21420	Mm.3629	NM_009335	ENSMUSG00000028640	Tfap2c	AA409384|AP2gamma|Ap-2.2|Stra2|Tcfap2c	transcription factor AP-2, gamma	protein-coding
MACS_peak_13695	chr2	172558780	172559491	+	Intergenic	Intergenic	182644	NM_001159696	21420	Mm.3629	NM_009335	ENSMUSG00000028640	Tfap2c	AA409384|AP2gamma|Ap-2.2|Stra2|Tcfap2c	transcription factor AP-2, gamma	protein-coding
MACS_peak_13699	chr2	172661866	172662580	+	Intergenic	RMER1B|Other|Other	103599	NM_007557	12162	Mm.595	NM_007557	ENSMUSG00000008999	Bmp7	OP1	bone morphogenetic protein 7	protein-coding
MACS_peak_13704	chr2	172984745	172985275	+	TTS (NM_011044)	TTS (NM_011044)	6436	NM_011044	18534	Mm.266867	NM_011044	ENSMUSG00000027513	Pck1	AI265463|PEPCK|Pck-1	phosphoenolpyruvate carboxykinase 1, cytosolic	protein-coding
MACS_peak_13707	chr2	173106997	173107600	+	Intergenic	Intergenic	-5264	NM_022995	65112	Mm.73682	NM_022995	ENSMUSG00000038400	Pmepa1	2210418I02Rik|AW455466|Erg1.2|N4wbp4|Stag1|Tmepai	prostate transmembrane protein, androgen induced 1	protein-coding
MACS_peak_13709	chr2	173145285	173145791	+	Intergenic	RLTR11B|LTR|ERVK	-43504	NM_022995	65112	Mm.73682	NM_022995	ENSMUSG00000038400	Pmepa1	2210418I02Rik|AW455466|Erg1.2|N4wbp4|Stag1|Tmepai	prostate transmembrane protein, androgen induced 1	protein-coding
MACS_peak_1371	chr1	153410731	153411214	+	Intergenic	Intergenic	-7531	NM_022018	63913	Mm.157700	NM_022018		Fam129a	AI256368|AU019833|Niban	family with sequence similarity 129, member A	protein-coding
MACS_peak_13711	chr2	173409014	173409420	+	intron (NR_027957, intron 13 of 14)	intron (NR_027957, intron 13 of 14)	-5375	NM_027303	70065	Mm.425115	NM_027303	ENSMUSG00000027517	Ankrd60	1700019A24Rik|1700030G11Rik	ankyrin repeat domain 60	protein-coding
MACS_peak_13712	chr2	173830880	173831517	+	Intergenic	ID4_|SINE|ID	-71354	NM_172675	228960	Mm.277977	NM_172675	ENSMUSG00000027522	Stx16	4930401D03|5430410K23Rik|6330500A18Rik|AI648908|AW553605|Syn16	syntaxin 16	protein-coding
MACS_peak_13716	chr2	174083107	174083680	+	Intergenic	Intergenic	9233	NR_029646	723906		NR_029646	miRBase:MI0000394	Mir296	Mirn296|mmu-mir-296	microRNA 296	ncRNA
MACS_peak_13717	chr2	174086602	174087338	+	Intergenic	Intergenic	5656	NR_029646	723906		NR_029646	miRBase:MI0000394	Mir296	Mirn296|mmu-mir-296	microRNA 296	ncRNA
MACS_peak_13718	chr2	174113228	174113862	+	intron (NR_002846, intron 1 of 4)	intron (NR_002846, intron 1 of 4)	3724	NM_022000	14683	Mm.125770	NM_010309	ENSMUSG00000027523	Gnas	5530400H20Rik|A930027G11Rik|C130027O20Rik|GPSA|GSP|Galphas|Gnas1|Gnasxl|Gsa|Nesp|Nespl|Oed-Sml|Oedsml|P1|P2|P3|PHP1A|PHP1B|POH	GNAS (guanine nucleotide binding protein, alpha stimulating) complex locus	protein-coding
MACS_peak_13720	chr2	174742779	174743289	+	Intergenic	Intergenic	150236	NM_001085546	664987		NM_001085546	ENSMUSG00000078905	Gm14393	OTTMUSG00000016546	predicted gene 14393	protein-coding
MACS_peak_13727	chr2	174892876	174893967	+	promoter-TSS (NM_001085546)	promoter-TSS (NM_001085546)	-151	NM_001085546	664987		NM_001085546	ENSMUSG00000078905	Gm14393	OTTMUSG00000016546	predicted gene 14393	protein-coding
MACS_peak_1373	chr1	153584215	153584830	+	Intergenic	Intergenic	-17982	NM_001039644	66967	Mm.337691	NM_001039644	ENSMUSG00000043019	Edem3	2310050N11Rik	ER degradation enhancer, mannosidase alpha-like 3	protein-coding
MACS_peak_13754	chr2	176894794	176895083	+	Intergenic	RLTR1|LTR|ERV1	-44831	NR_040256	626877	Mm.490744	NR_040256		Gm14405	OTTMUSG00000016573	predicted gene 14405	pseudo
MACS_peak_13755	chr2	176913664	176914832	+	Intergenic	Intergenic	-64141	NR_040256	626877	Mm.490744	NR_040256		Gm14405	OTTMUSG00000016573	predicted gene 14405	pseudo
MACS_peak_1376	chr1	153917532	153918054	+	intron (NM_197990, intron 1 of 5)	intron (NM_197990, intron 1 of 5)	19657	NM_197990	69399	Mm.278031	NM_197990	ENSMUSG00000032666	1700025G04Rik	2610510E02Rik|2900042O04Rik|ENSMUSG00000073540	RIKEN cDNA 1700025G04 gene	protein-coding
MACS_peak_13760	chr2	177015134	177015811	+	Intergenic	Intergenic	-165365	NR_040256	626877	Mm.490744	NR_040256		Gm14405	OTTMUSG00000016573	predicted gene 14405	pseudo
MACS_peak_13763	chr2	177053104	177053860	+	Intergenic	Intergenic	-195965	NM_001177568	628308	Mm.460436	NM_001177568		Gm14420	OTTMUSG00000016588	predicted gene 14420	protein-coding
MACS_peak_13766	chr2	177103716	177104381	+	Intergenic	Intergenic	-145399	NM_001177568	628308	Mm.460436	NM_001177568		Gm14420	OTTMUSG00000016588	predicted gene 14420	protein-coding
MACS_peak_1377	chr1	153964757	153965172	+	Intergenic	MER58C|DNA|MER1_type	-27514	NM_197990	69399	Mm.278031	NM_197990	ENSMUSG00000032666	1700025G04Rik	2610510E02Rik|2900042O04Rik|ENSMUSG00000073540	RIKEN cDNA 1700025G04 gene	protein-coding
MACS_peak_13773	chr2	177303570	177304094	+	Intergenic	LTRIS3|LTR|ERV1	20901	NR_036450	433520	Mm.425117	NM_001024825		Gm14403	OTTMUSG00000016571	predicted gene 14403	ncRNA
MACS_peak_13779	chr2	177500519	177501426	+	intron (NM_001243903, intron 2 of 4)	intron (NM_001243903, intron 2 of 4)	6979	NM_001243903	626802	Mm.386029	NM_001243903		Gm14322	OTTMUSG00000016321	predicted gene 14322	protein-coding
MACS_peak_13781	chr2	177529567	177530164	+	Intergenic	L1Md_F2|LINE|L1	35872	NM_001243903	626802	Mm.386029	NM_001243903		Gm14322	OTTMUSG00000016321	predicted gene 14322	protein-coding
MACS_peak_13783	chr2	177570658	177571540	+	intron (NM_001024849, intron 1 of 3)	intron (NM_001024849, intron 1 of 3)	3924	NM_001024849	329575	Mm.425123	NM_001024849		Gm14325	OTTMUSG00000016325	predicted gene 14325	protein-coding
MACS_peak_1379	chr1	154048702	154049170	+	Intergenic	RLTR13D5|LTR|ERVK	-111486	NM_197990	69399	Mm.278031	NM_197990	ENSMUSG00000032666	1700025G04Rik	2610510E02Rik|2900042O04Rik|ENSMUSG00000073540	RIKEN cDNA 1700025G04 gene	protein-coding
MACS_peak_13793	chr2	177824321	177824800	+	Intergenic	Intergenic	-11430	NM_001162922	353208	Mm.381194	NM_001162922		Zfp931	2810021G02Rik	zinc finger protein 931	protein-coding
MACS_peak_13797	chr2	178683733	178684403	+	Intergenic	Intergenic	-465573	NM_026596	68175	Mm.158187	NM_026596		4930591A17Rik	-	RIKEN cDNA 4930591A17 gene	protein-coding
MACS_peak_1380	chr1	154160649	154161131	+	Intergenic	ORR1A4|LTR|MaLR	72922	NM_025677	66637	Mm.379120	NM_025677	ENSMUSG00000014980	Tsen15	5730449L18Rik|AL023077|Sen15	tRNA splicing endonuclease 15 homolog (S. cerevisiae)	protein-coding
MACS_peak_13800	chr2	178855817	178856396	+	Intergenic	MLT2B1|LTR|ERVL	-293535	NM_026596	68175	Mm.158187	NM_026596		4930591A17Rik	-	RIKEN cDNA 4930591A17 gene	protein-coding
MACS_peak_13802	chr2	179274184	179274773	+	intron (NM_009867, intron 2 of 15)	intron (NM_009867, intron 2 of 15)	97295	NM_009867	12561	Mm.184711	NM_009867	ENSMUSG00000000305	Cdh4	AW120700|R-Cadh|R-cadherin|Rcad	cadherin 4	protein-coding
MACS_peak_13810	chr2	179719146	179719651	+	Intergenic	L1MEf|LINE|L1	7840	NR_033782	66730	Mm.31773	NR_033782	ENSMUSG00000085704	4921531C22Rik	-	RIKEN cDNA 4921531C22 gene	ncRNA
MACS_peak_13811	chr2	179769621	179770088	+	3' UTR (NM_177727, exon 9 of 9)	3' UTR (NM_177727, exon 9 of 9)	7315	NM_001289476	26444	Mm.21728	NM_011969	ENSMUSG00000027566	Psma7	C6-I	proteasome (prosome, macropain) subunit, alpha type 7	protein-coding
MACS_peak_13812	chr2	179813805	179814421	+	intron (NM_001083329, intron 3 of 7)	intron (NM_001083329, intron 3 of 7)	8815	NM_001083329	52856	Mm.219658	NM_028422	ENSMUSG00000039069	Mtg2	1810011P19Rik|2900056P18Rik|D2Bwg0647e|Gtpbp5	mitochondrial ribosome associated GTPase 2	protein-coding
MACS_peak_13817	chr2	179986508	179987108	+	Intergenic	B4A|SINE|B4	-5276	NM_025587	66481	Mm.289669	NM_025587	ENSMUSG00000039001	Rps21	1810049N11Rik|2410030A14Rik	ribosomal protein S21	protein-coding
MACS_peak_1382	chr1	154420148	154420914	+	intron (NM_016846, intron 3 of 17)	intron (NM_016846, intron 3 of 17)	51710	NM_016846	19731	Mm.245270	NM_016846	ENSMUSG00000026482	Rgl1	Rgl|mKIAA0959	ral guanine nucleotide dissociation stimulator,-like 1	protein-coding
MACS_peak_13823	chr2	180442661	180444928	+	intron (NM_001291432, intron 1 of 5)	intron (NM_001291432, intron 1 of 5)	910	NM_177852	23856	Mm.253836	NM_011805	ENSMUSG00000038914	Dido1	6720461J16Rik|D130048F08Rik|DATF-1|DIO-1|Datf1	death inducer-obliterator 1	protein-coding
MACS_peak_13824	chr2	180474966	180475476	+	intron (NM_183161, intron 10 of 12)	intron (NM_183161, intron 10 of 12)	15177	NM_183161	228993	Mm.87189	NM_183161	ENSMUSG00000023393	Slc17a9	1700019H03Rik|BC019537|Vnut	solute carrier family 17, member 9	protein-coding
MACS_peak_13825	chr2	180479846	180480418	+	Intergenic	Intergenic	20088	NM_183161	228993	Mm.87189	NM_183161	ENSMUSG00000023393	Slc17a9	1700019H03Rik|BC019537|Vnut	solute carrier family 17, member 9	protein-coding
MACS_peak_13826	chr2	180502122	180502836	+	Intergenic	L1MB4|LINE|L1	9126	NM_080641	140489	Mm.134062	NM_080641	ENSMUSG00000045493	Bhlhe23	A930001L02Rik|BETA4|Bhlhb4	basic helix-loop-helix family, member e23	protein-coding
MACS_peak_13827	chr2	180515076	180515475	+	Intergenic	ORR1C1|LTR|MaLR	-3670	NM_080641	140489	Mm.134062	NM_080641	ENSMUSG00000045493	Bhlhe23	A930001L02Rik|BETA4|Bhlhb4	basic helix-loop-helix family, member e23	protein-coding
MACS_peak_13828	chr2	180567258	180567968	+	Intergenic	Intergenic	-56008	NM_080641	140489	Mm.134062	NM_080641	ENSMUSG00000045493	Bhlhe23	A930001L02Rik|BETA4|Bhlhb4	basic helix-loop-helix family, member e23	protein-coding
MACS_peak_13830	chr2	180688313	180688852	+	intron (NM_021426, intron 1 of 6)	intron (NM_021426, intron 1 of 6)	822	NM_001141933	58237	Mm.40361	NM_021426	ENSMUSG00000027574	Nkain4	AB030182|C030019F02Rik	Na+/K+ transporting ATPase interacting 4	protein-coding
MACS_peak_13831	chr2	180862332	180863066	+	intron (NM_001003824, intron 1 of 16)	intron (NM_001003824, intron 1 of 16)	7231	NM_001006679	16536	Mm.40615	NM_010611	ENSMUSG00000016346	Kcnq2	HNSPC|KQT2|Nmf134	potassium voltage-gated channel, subfamily Q, member 2	protein-coding
MACS_peak_13833	chr2	180921312	180921837	+	promoter-TSS (NM_025598)	promoter-TSS (NM_025598)	-474	NM_025598	66496	Mm.213943	NM_025598	ENSMUSG00000016344	Ppdpf	0610012G23Rik|2610317A05Rik|2700038C09Rik|3110053G12Rik	pancreatic progenitor cell differentiation and proliferation factor homolog (zebrafish)RIKEN cDNA 2700038C09 gene	protein-coding
MACS_peak_13834	chr2	181056860	181057379	+	exon (NM_001166666, exon 3 of 33)	exon (NM_001166666, exon 3 of 33)	1608	NR_030710	269400	Mm.11333	NM_001001882	ENSMUSG00000038685	Rtel1	AI451565|AW540478|Rtel	regulator of telomere elongation helicase 1	protein-coding
MACS_peak_13835	chr2	181067185	181067874	+	intron (NM_001001882, intron 8 of 33)	ID4|SINE|ID	12018	NR_030710	269400	Mm.11333	NM_001001882	ENSMUSG00000038685	Rtel1	AI451565|AW540478|Rtel	regulator of telomere elongation helicase 1	protein-coding
MACS_peak_13836	chr2	181414610	181415129	+	promoter-TSS (NM_009326)	promoter-TSS (NM_009326)	-146	NM_009326	21400	Mm.24245	NM_009326	ENSMUSG00000059540	Tcea2	AI326274|S-II-T1|SII-T1|Tceat	transcription elongation factor A (SII), 2	protein-coding
MACS_peak_1384	chr1	154614378	154614893	+	intron (NM_026369, intron 1 of 3)	intron (NM_026369, intron 1 of 3)	963	NM_026369	67771	Mm.288974	NM_026369	ENSMUSG00000008475	Arpc5	5830443F10Rik|p16-Arc	actin related protein 2/3 complex, subunit 5	protein-coding
MACS_peak_13845	chr3	3370690	3371381	+	Intergenic	ETnERV2-int|LTR|ERVK	-136995	NM_013920	30942	Mm.330897	NM_013920	ENSMUSG00000017688	Hnf4g	NR2A2	hepatocyte nuclear factor 4, gamma	protein-coding
MACS_peak_13848	chr3	3429706	3430530	+	Intergenic	ETnERV2-int|LTR|ERVK	-77912	NM_013920	30942	Mm.330897	NM_013920	ENSMUSG00000017688	Hnf4g	NR2A2	hepatocyte nuclear factor 4, gamma	protein-coding
MACS_peak_13849	chr3	3666640	3667332	+	Intergenic	RLTR13D6|LTR|ERVK	158956	NM_013920	30942	Mm.330897	NM_013920	ENSMUSG00000017688	Hnf4g	NR2A2	hepatocyte nuclear factor 4, gamma	protein-coding
MACS_peak_13850	chr3	3667565	3668237	+	Intergenic	MMETn-int|LTR|ERVK	159871	NM_013920	30942	Mm.330897	NM_013920	ENSMUSG00000017688	Hnf4g	NR2A2	hepatocyte nuclear factor 4, gamma	protein-coding
MACS_peak_13852	chr3	3935464	3935942	+	Intergenic	Lx2|LINE|L1	427673	NM_013920	30942	Mm.330897	NM_013920	ENSMUSG00000017688	Hnf4g	NR2A2	hepatocyte nuclear factor 4, gamma	protein-coding
MACS_peak_13853	chr3	3961674	3962710	+	Intergenic	RLTR1B|LTR|ERV1	454162	NM_013920	30942	Mm.330897	NM_013920	ENSMUSG00000017688	Hnf4g	NR2A2	hepatocyte nuclear factor 4, gamma	protein-coding
MACS_peak_13854	chr3	3977292	3977811	+	Intergenic	RLTR13A|LTR|ERVK	469521	NM_013920	30942	Mm.330897	NM_013920	ENSMUSG00000017688	Hnf4g	NR2A2	hepatocyte nuclear factor 4, gamma	protein-coding
MACS_peak_13856	chr3	4146887	4147332	+	Intergenic	ETnERV2-int|LTR|ERVK	639079	NM_013920	30942	Mm.330897	NM_013920	ENSMUSG00000017688	Hnf4g	NR2A2	hepatocyte nuclear factor 4, gamma	protein-coding
MACS_peak_1386	chr1	154637173	154637878	+	Intergenic	B3|SINE|B2	-17495	NM_010877	17970	Mm.270307	NM_010877	ENSMUSG00000026480	Ncf2	NOXA2|Ncf-2|p67phox	neutrophil cytosolic factor 2	protein-coding
MACS_peak_13862	chr3	4743915	4744590	+	Intergenic	ETnERV2-int|LTR|ERVK	-54456	NR_045272	100503859	Mm.75172	NR_045272	ENSMUSG00000098659	1110015O18Rik	-	RIKEN cDNA 1110015O18 gene	ncRNA
MACS_peak_13863	chr3	4892956	4893638	+	Intergenic	ETnERV2-int|LTR|ERVK	94589	NR_045272	100503859	Mm.75172	NR_045272	ENSMUSG00000098659	1110015O18Rik	-	RIKEN cDNA 1110015O18 gene	ncRNA
MACS_peak_13865	chr3	5307908	5308274	+	intron (NM_030708, intron 3 of 10)	intron (NM_030708, intron 3 of 10)	-87268	NR_045905	72608	Mm.384359	NR_045905		2700069I18Rik	-	RIKEN cDNA 2700069I18 gene	ncRNA
MACS_peak_13868	chr3	5895557	5896079	+	Intergenic	BGLII|LTR|ERVK	-319570	NM_001163305	19302	Mm.132336	NM_008994	ENSMUSG00000040374	Pex2	D3Ertd138e|PAF-1|PMP35|Pxmp3	peroxisomal biogenesis factor 2	protein-coding
MACS_peak_13870	chr3	5988928	5989650	+	Intergenic	RLTR13D6|LTR|ERVK	-413041	NM_001163305	19302	Mm.132336	NM_008994	ENSMUSG00000040374	Pex2	D3Ertd138e|PAF-1|PMP35|Pxmp3	peroxisomal biogenesis factor 2	protein-coding
MACS_peak_13872	chr3	6093812	6094826	+	Intergenic	RLTR13C1|LTR|ERVK	-518071	NM_001163305	19302	Mm.132336	NM_008994	ENSMUSG00000040374	Pex2	D3Ertd138e|PAF-1|PMP35|Pxmp3	peroxisomal biogenesis factor 2	protein-coding
MACS_peak_13873	chr3	6173683	6174333	+	Intergenic	RLTR9A|LTR|ERVK	446435	NM_027048	69347	Mm.45822	NM_027048	ENSMUSG00000069118	1700008P02Rik	-	RIKEN cDNA 1700008P02 gene	protein-coding
MACS_peak_13874	chr3	6266959	6267507	+	Intergenic	RMER16-int|LTR|ERVK	353210	NM_027048	69347	Mm.45822	NM_027048	ENSMUSG00000069118	1700008P02Rik	-	RIKEN cDNA 1700008P02 gene	protein-coding
MACS_peak_13885	chr3	7166561	7167189	+	Intergenic	RLTR13D6|LTR|ERVK	-199729	NM_008862	18767	Mm.3193	NM_008862	ENSMUSG00000027499	Pkia	AI415001|PKIalpha	protein kinase inhibitor, alpha	protein-coding
MACS_peak_13886	chr3	7366746	7367197	+	intron (NM_008862, intron 1 of 2)	intron (NM_008862, intron 1 of 2)	367	NM_008862	18767	Mm.3193	NM_008862	ENSMUSG00000027499	Pkia	AI415001|PKIalpha	protein kinase inhibitor, alpha	protein-coding
MACS_peak_1389	chr1	154719165	154719619	+	intron (NM_001005507, intron 1 of 21)	intron (NM_001005507, intron 1 of 21)	5906	NM_001160257	226517	Mm.270775	NM_001005507	ENSMUSG00000042772	Smg7	9430023P16Rik|mKIAA0250	Smg-7 homolog, nonsense mediated mRNA decay factor (C. elegans)	protein-coding
MACS_peak_13891	chr3	7579185	7580086	+	intron (NM_008371, intron 2 of 4)	ORR1C2-int|LTR|MaLR	33792	NM_008371	16196	Mm.3825	NM_008371	ENSMUSG00000040329	Il7	A630026I06Rik|Il-7|hlb368	interleukin 7	protein-coding
MACS_peak_13892	chr3	7682451	7683422	+	Intergenic	RLTR13D6|LTR|ERVK	-69509	NM_008371	16196	Mm.3825	NM_008371	ENSMUSG00000040329	Il7	A630026I06Rik|Il-7|hlb368	interleukin 7	protein-coding
MACS_peak_13896	chr3	8000970	8001578	+	Intergenic	RLTR13D1|LTR|ERVK	-46387	NR_040587	75476	Mm.491752	NR_040587		1700010I02Rik	-	RIKEN cDNA 1700010I02 gene	ncRNA
MACS_peak_13897	chr3	8004316	8004724	+	Intergenic	Intergenic	-49633	NR_040587	75476	Mm.491752	NR_040587		1700010I02Rik	-	RIKEN cDNA 1700010I02 gene	ncRNA
MACS_peak_13898	chr3	8005432	8007084	+	Intergenic	RLTR13B1|LTR|ERVK	-51371	NR_040587	75476	Mm.491752	NR_040587		1700010I02Rik	-	RIKEN cDNA 1700010I02 gene	ncRNA
MACS_peak_13900	chr3	8123408	8123970	+	Intergenic	RLTR13D6|LTR|ERVK	-168802	NR_040587	75476	Mm.491752	NR_040587		1700010I02Rik	-	RIKEN cDNA 1700010I02 gene	ncRNA
MACS_peak_13901	chr3	8226206	8227011	+	Intergenic	IAPEz-int|LTR|ERVK	236490	NR_033512	620966	Mm.301719	NR_033512		Gm6194	1700003N22Rik|EG620966	transmembrane protein 189 pseudogene	pseudo
MACS_peak_13903	chr3	8384439	8385509	+	Intergenic	ETnERV2-int|LTR|ERVK	78124	NR_033512	620966	Mm.301719	NR_033512		Gm6194	1700003N22Rik|EG620966	transmembrane protein 189 pseudogene	pseudo
MACS_peak_13909	chr3	9008015	9009329	+	Intergenic	L1MB7|LINE|L1	-4157	NM_001025264	21985	Mm.371590	NM_009412	ENSMUSG00000027506	Tpd52	AI043038|mD52	tumor protein D52	protein-coding
MACS_peak_13913	chr3	9243789	9244487	+	Intergenic	Intergenic	-6429	NM_177660	229055	Mm.103262	NM_177660	ENSMUSG00000069114	Zbtb10	4832414A18|AU021107|RINZF	zinc finger and BTB domain containing 10	protein-coding
MACS_peak_13917	chr3	9524291	9524863	+	intron (NM_133218, intron 2 of 8)	intron (NM_133218, intron 2 of 8)	85508	NM_133218	170753	Mm.212908	NM_133218	ENSMUSG00000040209	Zfp704	C030026M03|C030034L19Rik|Gig1|Znf704	zinc finger protein 704	protein-coding
MACS_peak_13918	chr3	9591576	9592329	+	intron (NM_133218, intron 1 of 8)	intron (NM_133218, intron 1 of 8)	18133	NM_133218	170753	Mm.212908	NM_133218	ENSMUSG00000040209	Zfp704	C030026M03|C030034L19Rik|Gig1|Znf704	zinc finger protein 704	protein-coding
MACS_peak_13921	chr3	9641730	9642469	+	Intergenic	RLTR25A|LTR|ERVK	-32014	NM_133218	170753	Mm.212908	NM_133218	ENSMUSG00000040209	Zfp704	C030026M03|C030034L19Rik|Gig1|Znf704	zinc finger protein 704	protein-coding
MACS_peak_13922	chr3	9645213	9645976	+	Intergenic	Intergenic	-35509	NM_133218	170753	Mm.212908	NM_133218	ENSMUSG00000040209	Zfp704	C030026M03|C030034L19Rik|Gig1|Znf704	zinc finger protein 704	protein-coding
MACS_peak_13923	chr3	9645991	9646719	+	Intergenic	Intergenic	-36270	NM_133218	170753	Mm.212908	NM_133218	ENSMUSG00000040209	Zfp704	C030026M03|C030034L19Rik|Gig1|Znf704	zinc finger protein 704	protein-coding
MACS_peak_13924	chr3	9654189	9655056	+	Intergenic	Intergenic	-44537	NM_133218	170753	Mm.212908	NM_133218	ENSMUSG00000040209	Zfp704	C030026M03|C030034L19Rik|Gig1|Znf704	zinc finger protein 704	protein-coding
MACS_peak_13932	chr3	10306894	10307262	+	Intergenic	Intergenic	-5895	NM_029310	75497	Mm.47052	NM_029310	ENSMUSG00000027530	Fabp12	1700008G05Rik	fatty acid binding protein 12	protein-coding
MACS_peak_13933	chr3	10354129	10354483	+	Intergenic	Intergenic	-3005	NM_025512	66361	Mm.371617	NM_025512	ENSMUSG00000039795	Zfand1	2310008M20Rik|AW048890	zinc finger, AN1-type domain 1	protein-coding
MACS_peak_13936	chr3	10482429	10482943	+	Intergenic	RMER16-int|LTR|ERVK	-42556	NM_001127191	74718	Mm.440548	NM_029068	ENSMUSG00000027534	Snx16	4930522N22Rik|AI117577|AI747675	sorting nexin 16	protein-coding
MACS_peak_13937	chr3	10486143	10487141	+	Intergenic	ETnERV2-int|LTR|ERVK	-46512	NM_001127191	74718	Mm.440548	NM_029068	ENSMUSG00000027534	Snx16	4930522N22Rik|AI117577|AI747675	sorting nexin 16	protein-coding
MACS_peak_13940	chr3	11083271	11083883	+	Intergenic	Intergenic	-643447	NM_001127191	74718	Mm.440548	NM_029068	ENSMUSG00000027534	Snx16	4930522N22Rik|AI117577|AI747675	sorting nexin 16	protein-coding
MACS_peak_13943	chr3	11211363	11212033	+	Intergenic	RLTR13D6|LTR|ERVK	632661	NR_040751	100038545	Mm.388494	NR_040751		Gm10745	ENSMUSG00000074696	predicted gene 10745	ncRNA
MACS_peak_13946	chr3	11552058	11553120	+	Intergenic	ETnERV2-int|LTR|ERVK	291770	NR_040751	100038545	Mm.388494	NR_040751		Gm10745	ENSMUSG00000074696	predicted gene 10745	ncRNA
MACS_peak_13947	chr3	11553415	11554051	+	Intergenic	ETnERV2-int|LTR|ERVK	290626	NR_040751	100038545	Mm.388494	NR_040751		Gm10745	ENSMUSG00000074696	predicted gene 10745	ncRNA
MACS_peak_13948	chr3	11562884	11563473	+	Intergenic	Intergenic	281181	NR_040751	100038545	Mm.388494	NR_040751		Gm10745	ENSMUSG00000074696	predicted gene 10745	ncRNA
MACS_peak_13955	chr3	12215434	12215959	+	Intergenic	LTRIS2|LTR|ERV1	-371337	NR_040751	100038545	Mm.388494	NR_040751		Gm10745	ENSMUSG00000074696	predicted gene 10745	ncRNA
MACS_peak_13956	chr3	12216042	12216403	+	Intergenic	Intergenic	-371863	NR_040751	100038545	Mm.388494	NR_040751		Gm10745	ENSMUSG00000074696	predicted gene 10745	ncRNA
MACS_peak_1396	chr1	154839347	154840092	+	intron (NM_175460, intron 1 of 10)	intron (NM_175460, intron 1 of 10)	37488	NM_175460	226518	Mm.40548	NM_175460	ENSMUSG00000042751	Nmnat2	AI843915|D030041I09Rik|PNAT1|PNAT2	nicotinamide nucleotide adenylyltransferase 2	protein-coding
MACS_peak_13965	chr3	13168358	13168949	+	Intergenic	LTRIS2|LTR|ERV1	-303002	NM_178631	76897	Mm.422625	NM_178631	ENSMUSG00000039717	Ralyl	0710005M24Rik	RALY RNA binding protein-like	protein-coding
MACS_peak_13966	chr3	13709442	13709908	+	intron (NM_178631, intron 2 of 9)	BGLII|LTR|ERVK	-56810	NR_040598	75203	Mm.490940	NR_040598		4930539N22Rik	-	RIKEN cDNA 4930539N22 gene	ncRNA
MACS_peak_1397	chr1	154856202	154857410	+	intron (NM_175460, intron 1 of 10)	RLTR41|LTR|ERV1	54575	NM_175460	226518	Mm.40548	NM_175460	ENSMUSG00000042751	Nmnat2	AI843915|D030041I09Rik|PNAT1|PNAT2	nicotinamide nucleotide adenylyltransferase 2	protein-coding
MACS_peak_13971	chr3	14446404	14447186	+	Intergenic	ETnERV2-int|LTR|ERVK	-33904	NM_080852	140918	Mm.215250	NM_080852	ENSMUSG00000039710	Slc7a12	Asc-2|XAT1	solute carrier family 7 (cationic amino acid transporter, y+ system), member 12	protein-coding
MACS_peak_13972	chr3	14621157	14621758	+	Intergenic	Intergenic	-10201	NM_001099674	69126	Mm.389020	NM_001099674	ENSMUSG00000078784	1810022K09Rik	AI746582|AL023036	RIKEN cDNA 1810022K09 gene	protein-coding
MACS_peak_13978	chr3	14869636	14870304	+	intron (NM_007606, intron 5 of 6)	intron (NM_007606, intron 5 of 6)	6432	NM_007606	12350	Mm.300	NM_007606	ENSMUSG00000027559	Car3	BB219044|Ca3|Car-3	carbonic anhydrase 3	protein-coding
MACS_peak_1398	chr1	154871955	154872312	+	intron (NM_175460, intron 1 of 10)	L1ME2|LINE|L1	69902	NM_175460	226518	Mm.40548	NM_175460	ENSMUSG00000042751	Nmnat2	AI843915|D030041I09Rik|PNAT1|PNAT2	nicotinamide nucleotide adenylyltransferase 2	protein-coding
MACS_peak_13985	chr3	15000546	15001054	+	intron (NR_040549, intron 4 of 4)	RLTR41|LTR|ERV1	29599	NR_040550	77127	Mm.195792	NR_040549	ENSMUSG00000098008	A930001A20Rik	-	RIKEN cDNA A930001A20 gene	ncRNA
MACS_peak_13989	chr3	15056781	15057382	+	Intergenic	MMETn-int|LTR|ERVK	85880	NR_040550	77127	Mm.195792	NR_040549	ENSMUSG00000098008	A930001A20Rik	-	RIKEN cDNA A930001A20 gene	ncRNA
MACS_peak_13990	chr3	15159385	15159929	+	Intergenic	RLTR13B3|LTR|ERVK	172645	NM_001076679	751864	Mm.431296	NM_001076679	ENSMUSG00000078783	Gm9733	-	predicted gene 9733	protein-coding
MACS_peak_13992	chr3	15267154	15267731	+	Intergenic	LTRIS2|LTR|ERV1	64860	NM_001076679	751864	Mm.431296	NM_001076679	ENSMUSG00000078783	Gm9733	-	predicted gene 9733	protein-coding
MACS_peak_13995	chr3	15958763	15959356	+	Intergenic	MMETn-int|LTR|ERVK	-52727	NM_001081687	381484	Mm.217376	NM_001081687	ENSMUSG00000078780	Gm5150	-	predicted gene 5150	protein-coding
MACS_peak_1400	chr1	154884600	154885382	+	intron (NM_175460, intron 1 of 10)	intron (NM_175460, intron 1 of 10)	82760	NM_175460	226518	Mm.40548	NM_175460	ENSMUSG00000042751	Nmnat2	AI843915|D030041I09Rik|PNAT1|PNAT2	nicotinamide nucleotide adenylyltransferase 2	protein-coding
MACS_peak_14001	chr3	16787981	16788677	+	Intergenic	RMER6B|LTR|ERVK	705146	NM_001145919	229096	Mm.23834	NM_172677	ENSMUSG00000047213	Ythdf3	9130022A11Rik	YTH domain family 3	protein-coding
MACS_peak_14006	chr3	17686989	17687631	+	Intergenic	Intergenic	-2611	NR_033490	70441	Mm.458192	NR_033490		2610100L16Rik	100040120|Gm2612	RIKEN cDNA 2610100L16 gene	ncRNA
MACS_peak_14007	chr3	17813707	17814297	+	Intergenic	RLTR9D|LTR|ERVK	-34442	NM_029289	75439	Mm.27023	NM_029289	ENSMUSG00000027564	Cypt12	1700001F04Rik|AV209098	cysteine-rich perinuclear theca 12	protein-coding
MACS_peak_14011	chr3	18480690	18481516	+	Intergenic	MMETn-int|LTR|ERVK	-100626	NR_040544	73959	Mm.60616	NR_040544		4930433B08Rik	-	RIKEN cDNA 4930433B08 gene	ncRNA
MACS_peak_14013	chr3	18538306	18538676	+	Intergenic	Intergenic	-158014	NR_040544	73959	Mm.60616	NR_040544		4930433B08Rik	-	RIKEN cDNA 4930433B08 gene	ncRNA
MACS_peak_14019	chr3	19065142	19065727	+	Intergenic	B2_Mm2|SINE|B2	-2369	NM_028840	74252	Mm.200383	NM_028840	ENSMUSG00000027599	Armc1	2310016N05Rik|2900046P06Rik|3110009G21Rik|AA409258|AW048872|Arcp|C330014L16Rik	armadillo repeat containing 1	protein-coding
MACS_peak_1402	chr1	154890490	154890905	+	intron (NM_175460, intron 1 of 10)	L2|LINE|L2	88466	NM_175460	226518	Mm.40548	NM_175460	ENSMUSG00000042751	Nmnat2	AI843915|D030041I09Rik|PNAT1|PNAT2	nicotinamide nucleotide adenylyltransferase 2	protein-coding
MACS_peak_14022	chr3	19190300	19190943	+	intron (NM_001122759, intron 1 of 12)	intron (NM_001122759, intron 1 of 12)	20701	NM_001122759	18583	Mm.355614	NM_008802	ENSMUSG00000069094	Pde7a	AU015378|AW047537	phosphodiesterase 7A	protein-coding
MACS_peak_14024	chr3	19400922	19401494	+	Intergenic	RLTR13B1|LTR|ERVK	-7387	NM_001163536	66326	Mm.45615	NM_025489	ENSMUSG00000027606	Dnajc5b	1700008A05Rik	DnaJ (Hsp40) homolog, subfamily C, member 5 beta	protein-coding
MACS_peak_14025	chr3	19428310	19428751	+	intron (NM_025489, intron 1 of 4)	RLTR17|LTR|ERVK	-2717	NM_001163537	66326	Mm.45615	NM_025489	ENSMUSG00000027606	Dnajc5b	1700008A05Rik	DnaJ (Hsp40) homolog, subfamily C, member 5 beta	protein-coding
MACS_peak_14027	chr3	19528674	19529299	+	Intergenic	Intergenic	-15474	NM_001081281	381485	Mm.35419	NM_001081281	ENSMUSG00000060913	Trim55	D830041C10Rik|Murf2|Rnf29	tripartite motif-containing 55	protein-coding
MACS_peak_14031	chr3	19794596	19795023	+	promoter-TSS (NR_027985)	promoter-TSS (NR_027985)	-62	NR_027985	70808	Mm.427103	NR_027985		4632415L05Rik	AI662792	RRS1 ribosome biogenesis regulator homolog pseudogene	pseudo
MACS_peak_14032	chr3	19797155	19797668	+	non-coding (NR_027985, exon 1 of 1)	non-coding (NR_027985, exon 1 of 1)	2540	NR_027985	70808	Mm.427103	NR_027985		4632415L05Rik	AI662792	RRS1 ribosome biogenesis regulator homolog pseudogene	pseudo
MACS_peak_14033	chr3	19804671	19805029	+	Intergenic	Intergenic	9979	NR_027985	70808	Mm.427103	NR_027985		4632415L05Rik	AI662792	RRS1 ribosome biogenesis regulator homolog pseudogene	pseudo
MACS_peak_14035	chr3	19923594	19924576	+	intron (NM_080634, intron 5 of 16)	intron (NM_080634, intron 5 of 16)	11225	NM_001146323	12807	Mm.291533	NM_080634	ENSMUSG00000027615	Hps3	coa	Hermansky-Pudlak syndrome 3 homolog (human)	protein-coding
MACS_peak_14036	chr3	19944499	19945166	+	Intergenic	MMETn-int|LTR|ERVK	-9522	NM_080634	12807	Mm.291533	NM_080634	ENSMUSG00000027615	Hps3	coa	Hermansky-Pudlak syndrome 3 homolog (human)	protein-coding
MACS_peak_14038	chr3	20026864	20027417	+	intron (NM_013755, intron 6 of 7)	intron (NM_013755, intron 6 of 7)	27875	NM_013755	27357	Mm.6375	NM_013755	ENSMUSG00000019528	Gyg	AU017667|Gyg1	glycogenin	protein-coding
[truncated: 7,357 more rows]
