# Supplementary material for: Aurkb/PP1-mediated resetting of Oct4 during the cell cycle determines the identity of embryonic stem cells
Source: eLife. 2016 Feb 15;5:e10877. doi: 10.7554/eLife.10877 (PMC4798952; doi:10.7554/eLife.10877)
Supplement: Supplementary file 1. — DOI: http://dx.doi.org/10.7554/eLife.10877.021 [file elife-10877-supp1.xlsx]

## Sheet: Sheet1
Primers used for nascent RNA PCR
Gene	5’ primer	3’ primer
Oct4	GAAAGCAACTCAGAGGGAAC	CTACCCTACATGTTCCCAATTC
Sox2	TCGGCTCTGTTATTGGAATC	CATGCTAGCCACAAAGAAATG
Nanog	AGGGTCTGCTACTGAGATG	GGGTTTCCAGAAGAGTGATAAG
Klf4	TCCAACATCTCACCTACCTC	AGGATCTCGGGCAATCTG
Esrrb	CAAATGCGAGTACATGCTTAAC	CACCCAAAGCCTGAATCC
Nr5a2	GGCTTTCTTCTGCTGCTTC	TCCATTTCCTCAAGCTCTTTC
Bub1	TCTGCCACATAGCATTCTAAGAG	CACAATGAGGCTGAACCTAAAG
Rif1	TCTGGAGACTTGGGAAGACC	GTCACTCGGCAGGCAATG
Primers used for Real-Time qPCR
Gene	5’ primer	3’ primer
Oct4	GGCGTTCTCTTTGGAAAGGTGTTC	CTCGAACCACATCCTTCTCT
Sox2	TCCGGGAAGCGTGTACTTATCCTT	CCAAGATGCACAACTCGGAGATCA
Nanog	ATGAAGTGCAAGCGGTGGCAGAAA	CCTGGTGGAGTCACAGAGTAGTTC
Klf4	ACAGGCGAGAAACCTTACCACTGT	GCCTCTTCATGTGTAAGGCAAGGT
Esrrb	AGTACAAGCGACGGCTGGAT	CCTAGTAGATTCGAGACGATCTTAGTCA
Klf2	CGCACCTAAAGGCGCATCTG	TTCGGTAGTGGCGGGTAAGC
Nr5a2	TCTCACACACAGAAGTCGCGTTCA	TGCAGGTTCTCCAGGTTCTTCACA
Rex1	CAGCTCCTGCACACAGAAGA	ACTGATCCGCAAACACCTG
Bub1	TGACCTGGGTCAGAGTATAG	AAGAGCCAAAGAGCATACAG
Rif1	GCAAGGATGTTGAGACTGAG	CAAGTATGTCCGTCTCCTTTAC
Primers used for ChIP qPCR
Gene	5’ primer	3’ primer
Oct4	CTTGAACTGTGGTGGAGAGTGCTG	TAAGGAAGGGCTAGGACGAGAGG
Sox2	TTAGGGTAAGGTACTGGGAAG	TTCCTATGTGTGAGCAAGAAC
Nanog	TTAGATCAGAGGATGCCCCCTAAG	CCCGAACATATTCCAAAGAGCCCA
Esrrb	GGCTGGTATCACCTGATTTAC	CACCACTACAGTCAGGATCT
Nr5a2	CGGTTGCAATTACAAAGGATGA	CGCCGAGGCTGGATAAA
Bub1	TATGTTCTGCTGGGTGATTG	GCTGAGAATGACCTTGAATTC
Rif1	GGGTCCAATGGAAGTAAACC	ACTAGTGGCAGCACATTTC
