# Supplementary figures and images for: Aurkb/PP1-mediated resetting of Oct4 during the cell cycle determines the identity of embryonic stem cells
Source: eLife journal article supplement (doi:10.7554/elife.10877), 2016-02-15

Figure 1 – figure supplement 2

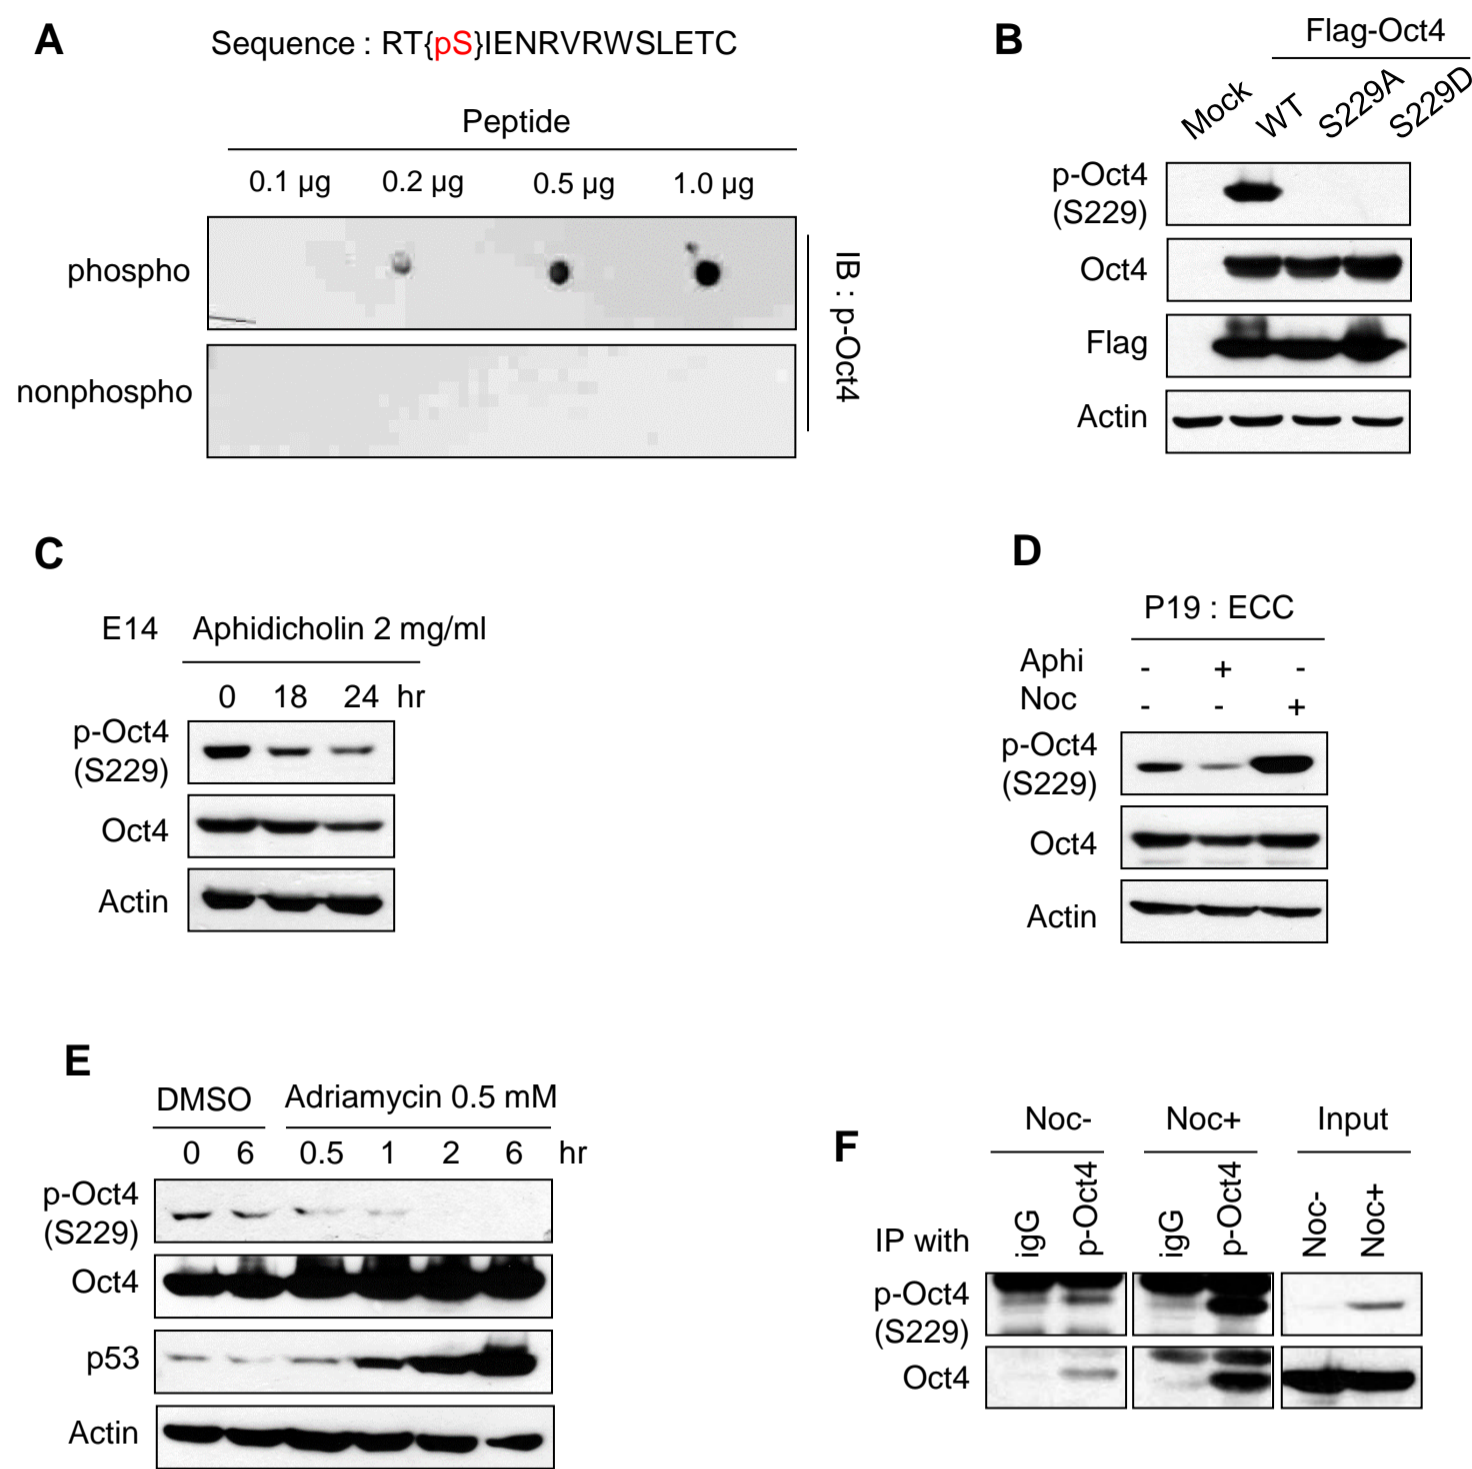

Supplement: supp [file elife-10877-supp-v1.zip]

Figure 3 – figure supplement 1

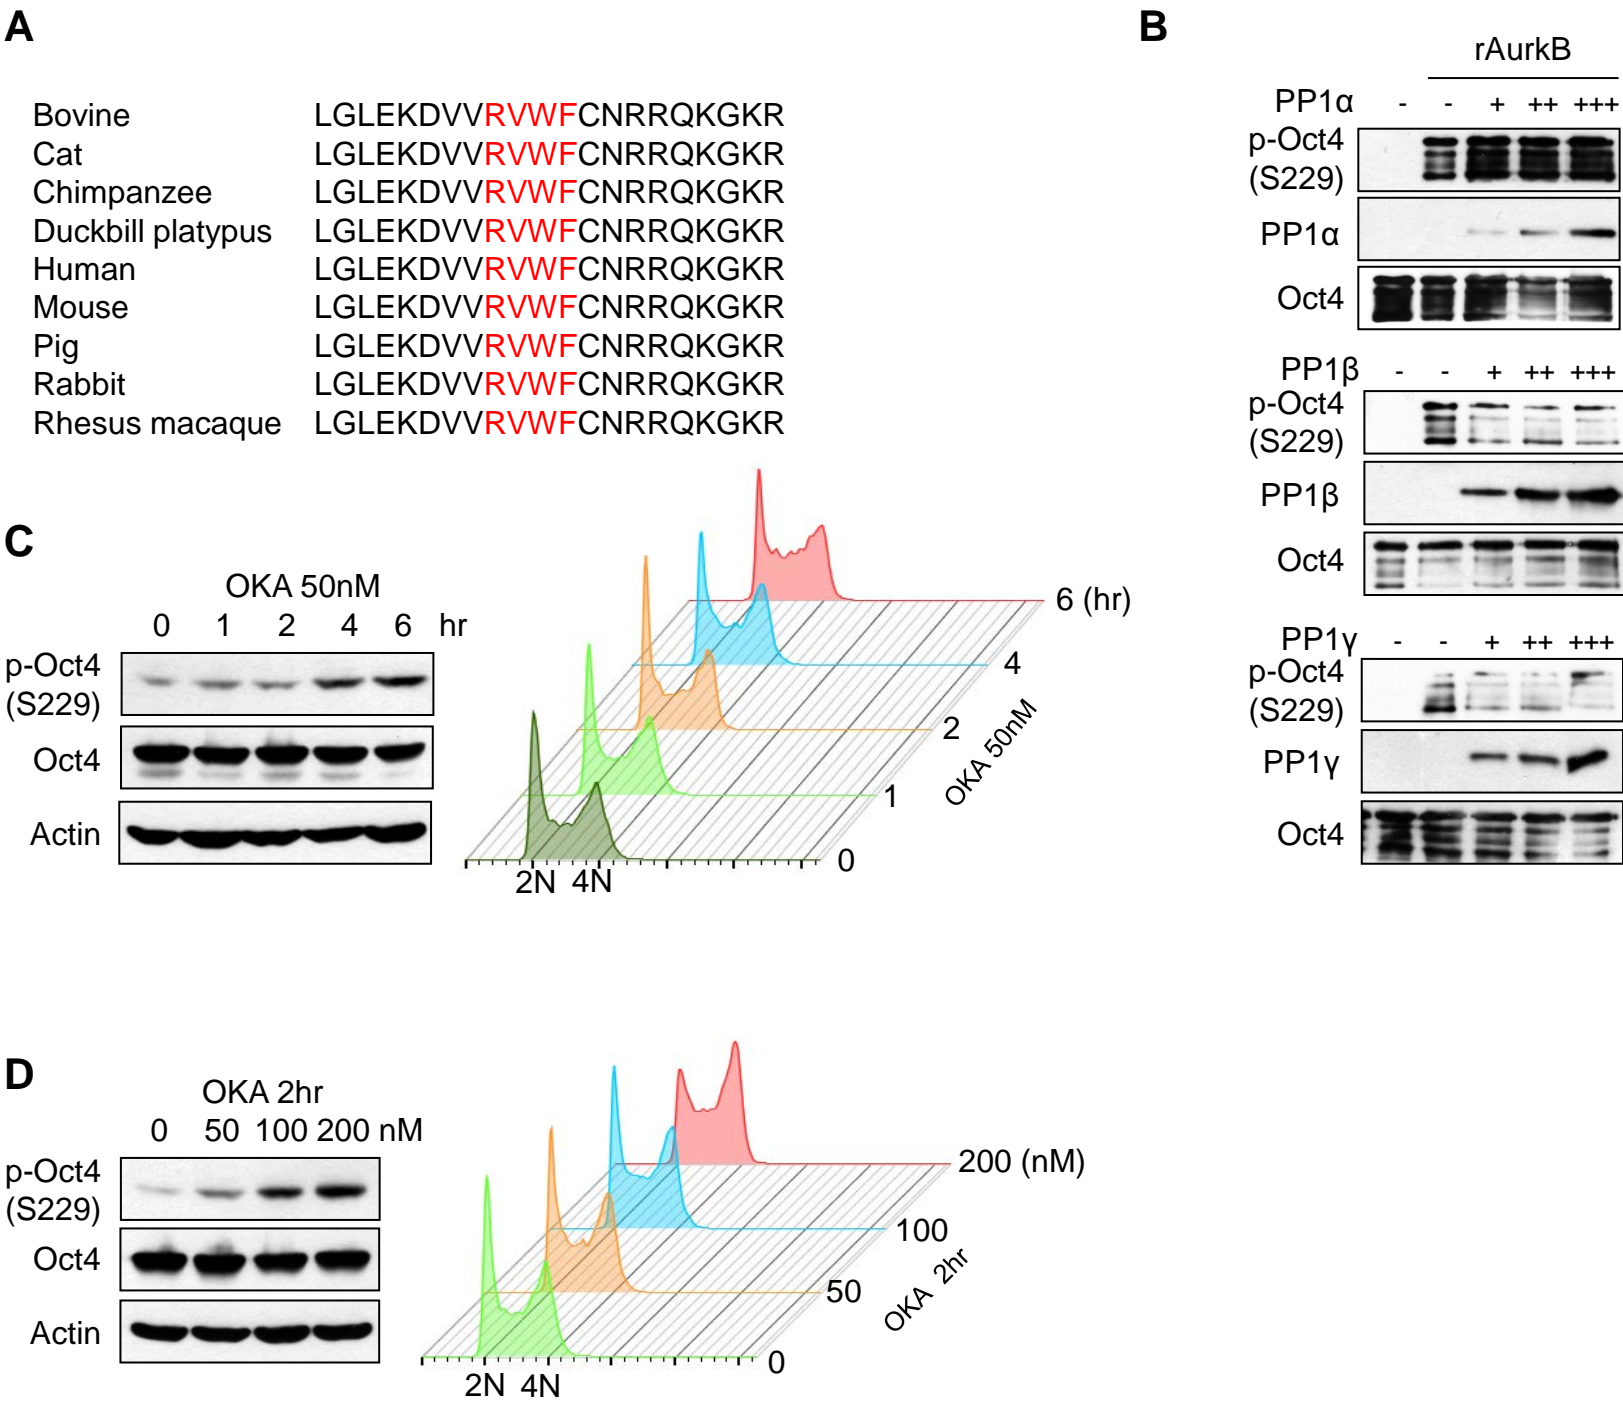

Supplement: supp [file elife-10877-supp-v1.zip]

Figure 7 – figure supplement 1

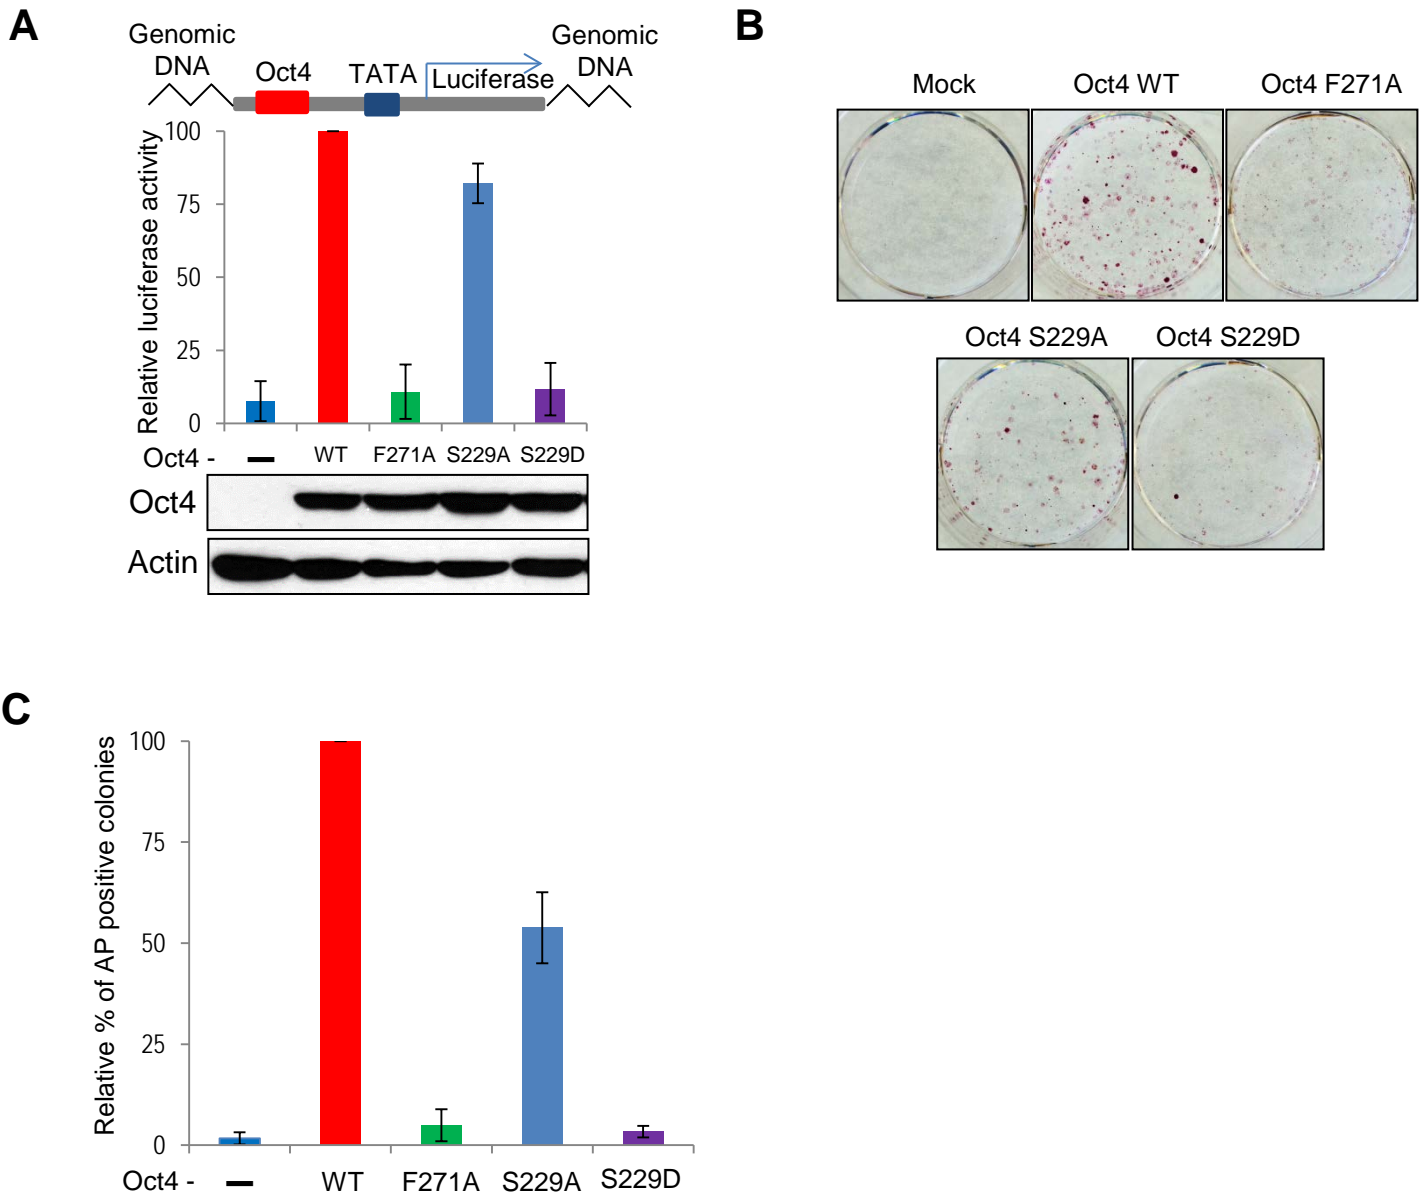

Supplement: supp [file elife-10877-supp-v1.zip]

Figure 4 – figure supplement 1

A

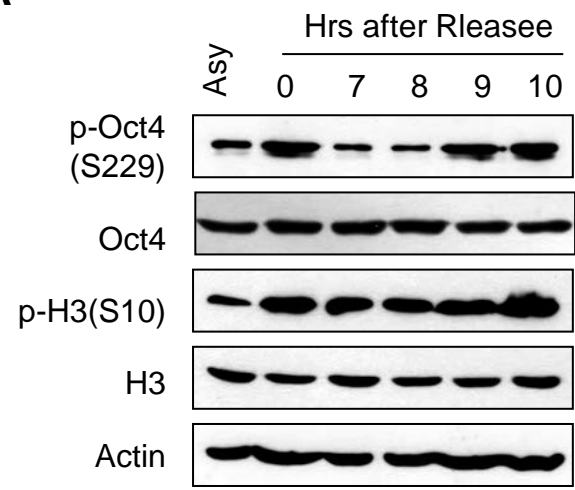

B

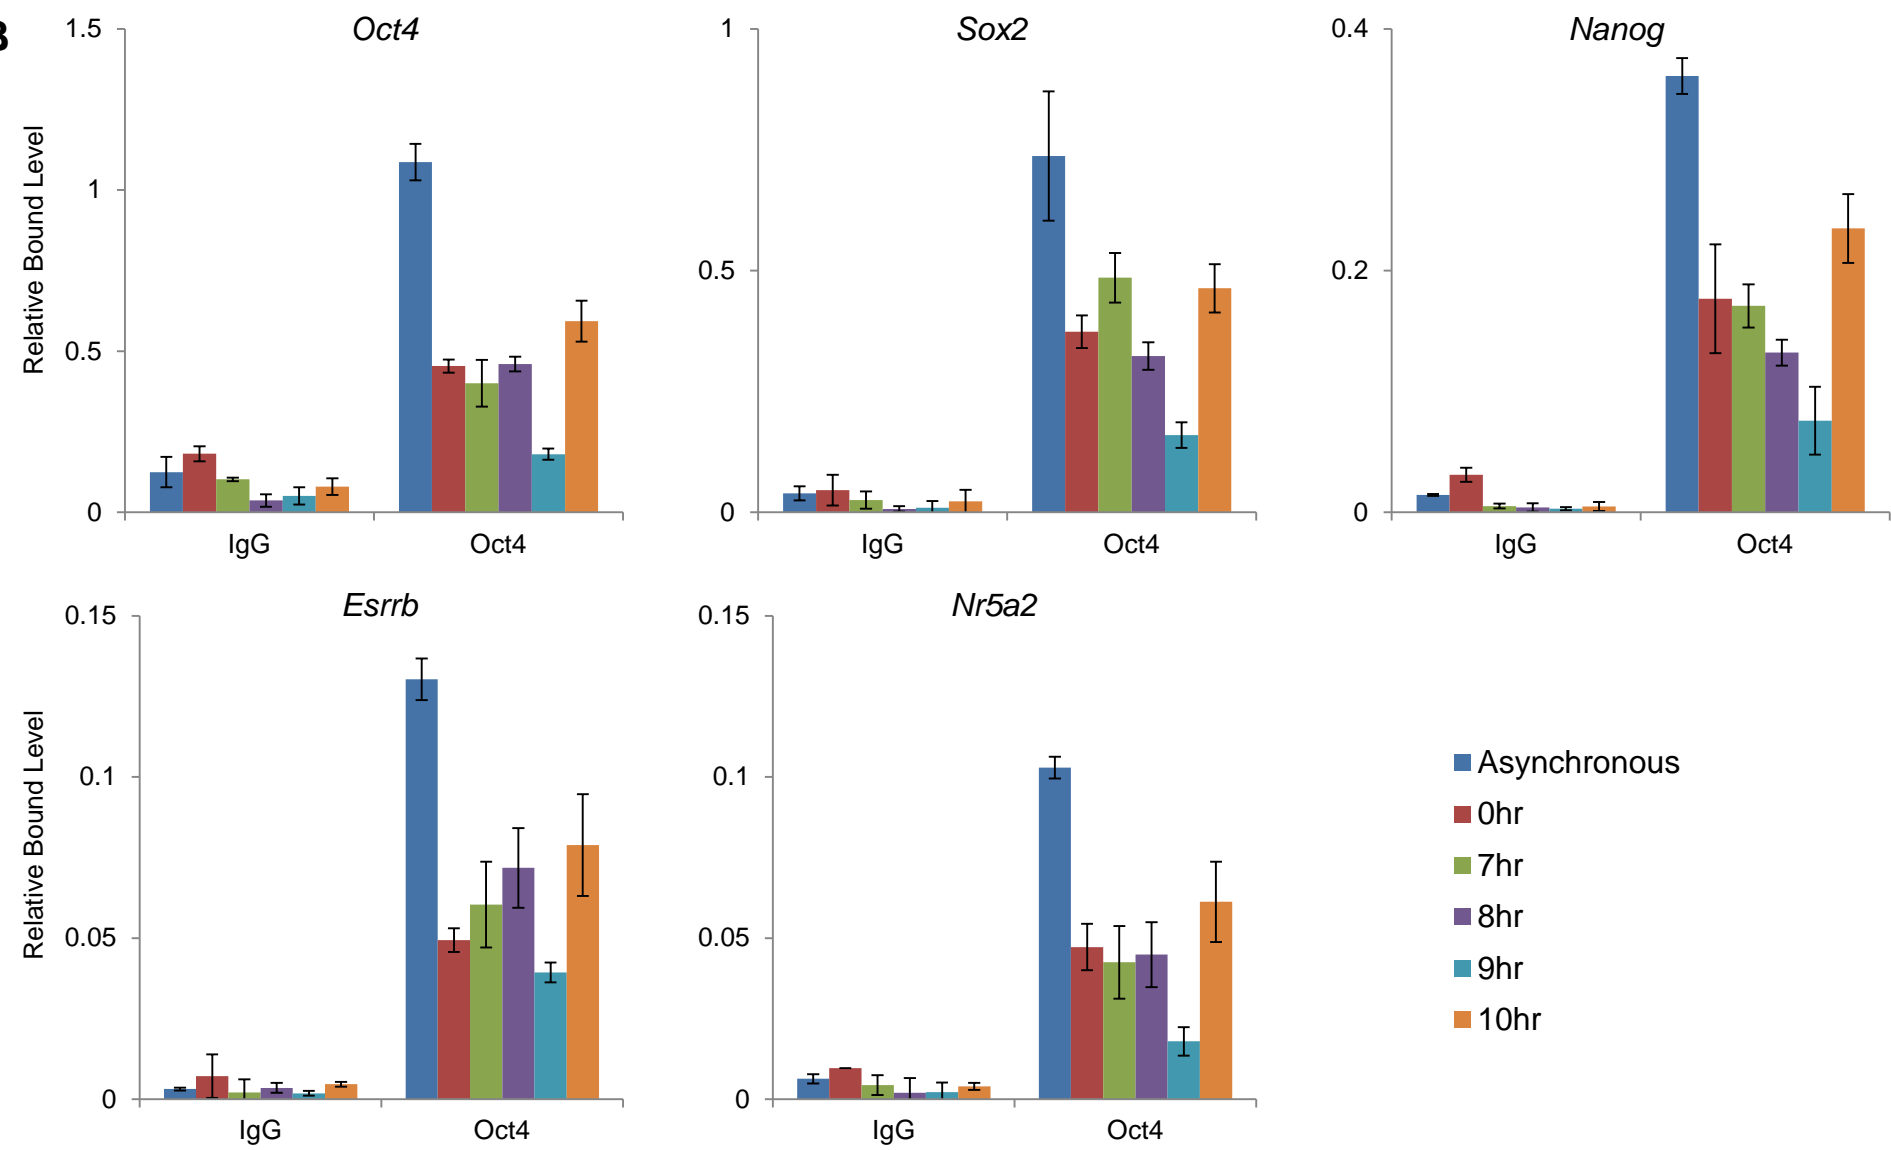

C

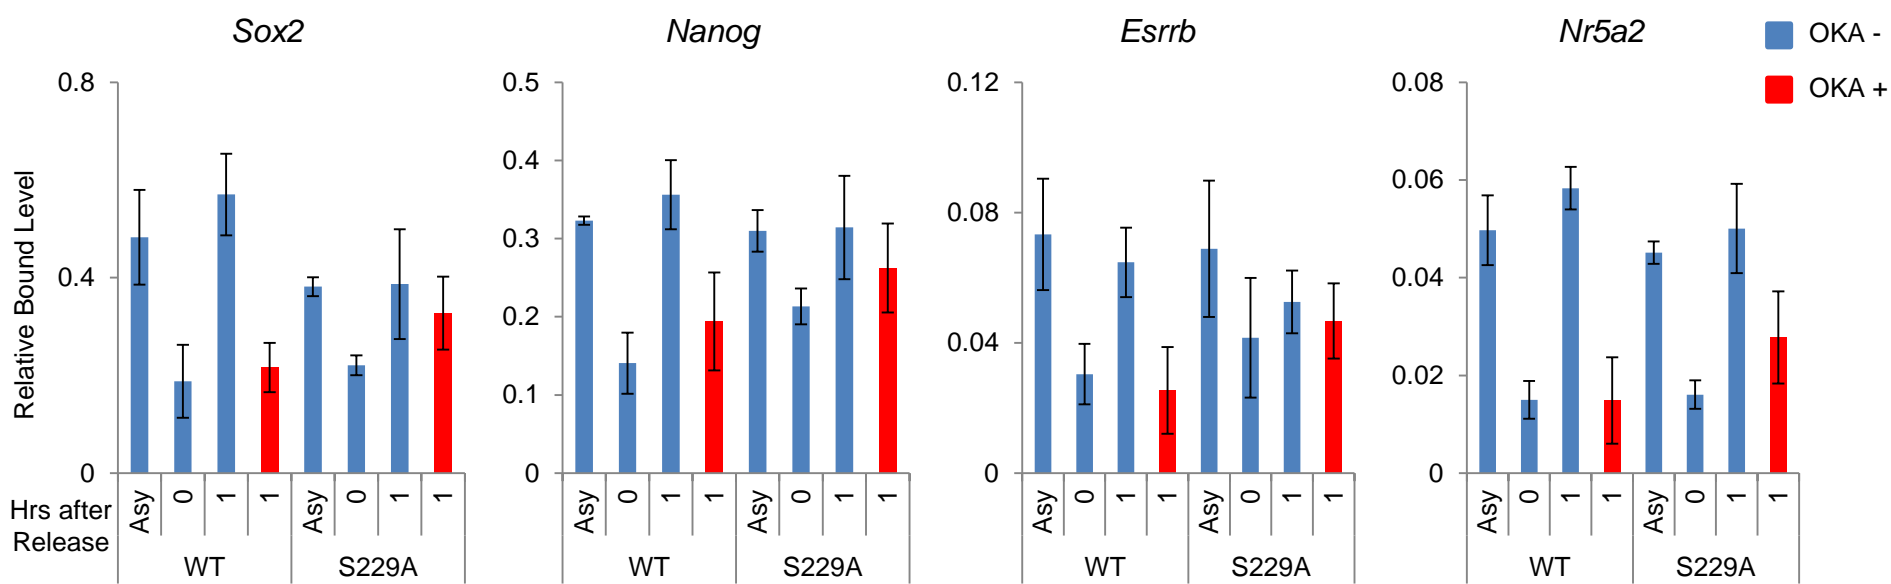

Supplement: supp [file elife-10877-supp-v1.zip]

Figure 2 – figure supplement 1

A

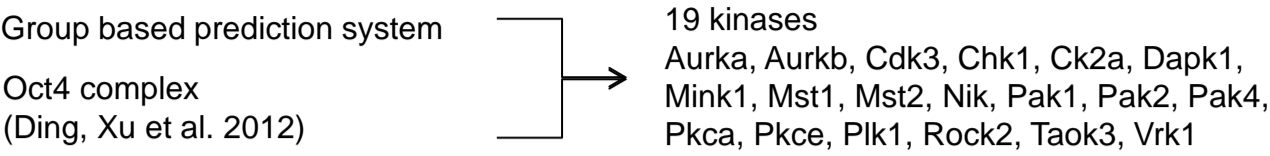

B

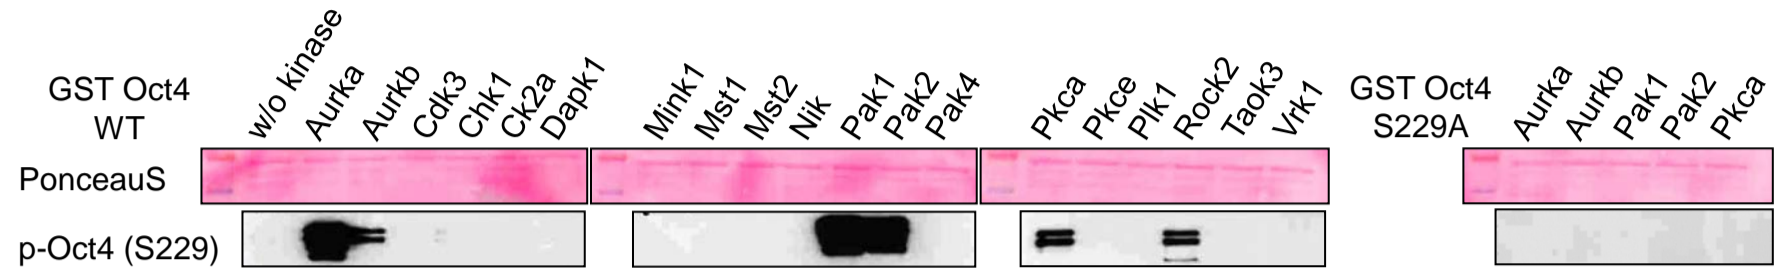

C

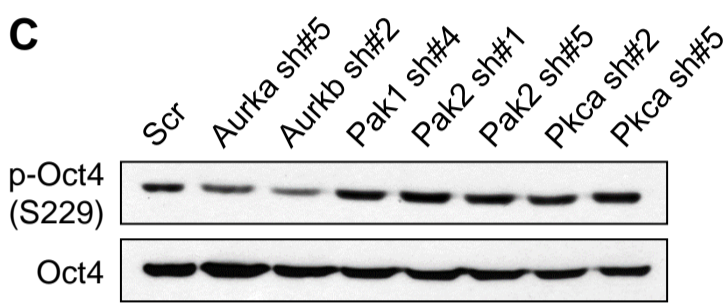

D

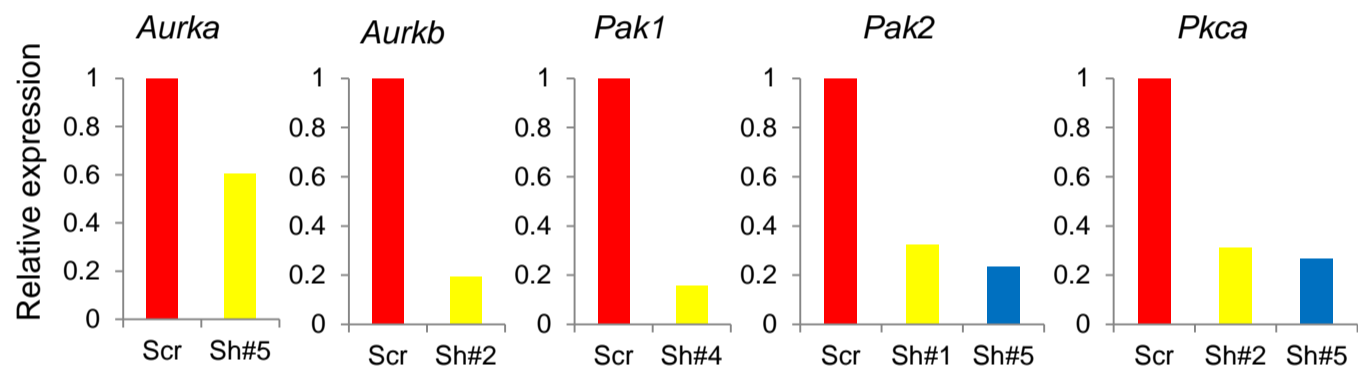

E

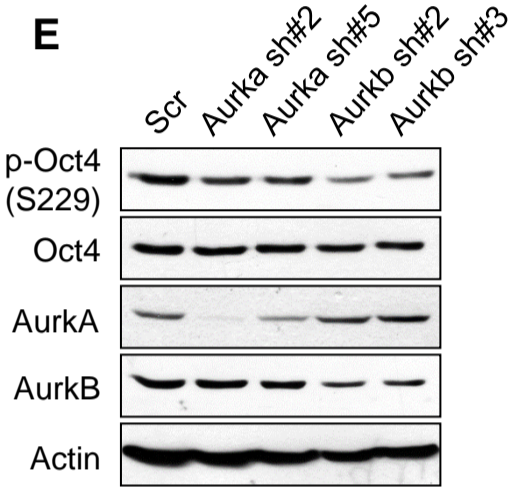

Supplement: supp [file elife-10877-supp-v1.zip]

Figure 1 – figure supplement 1

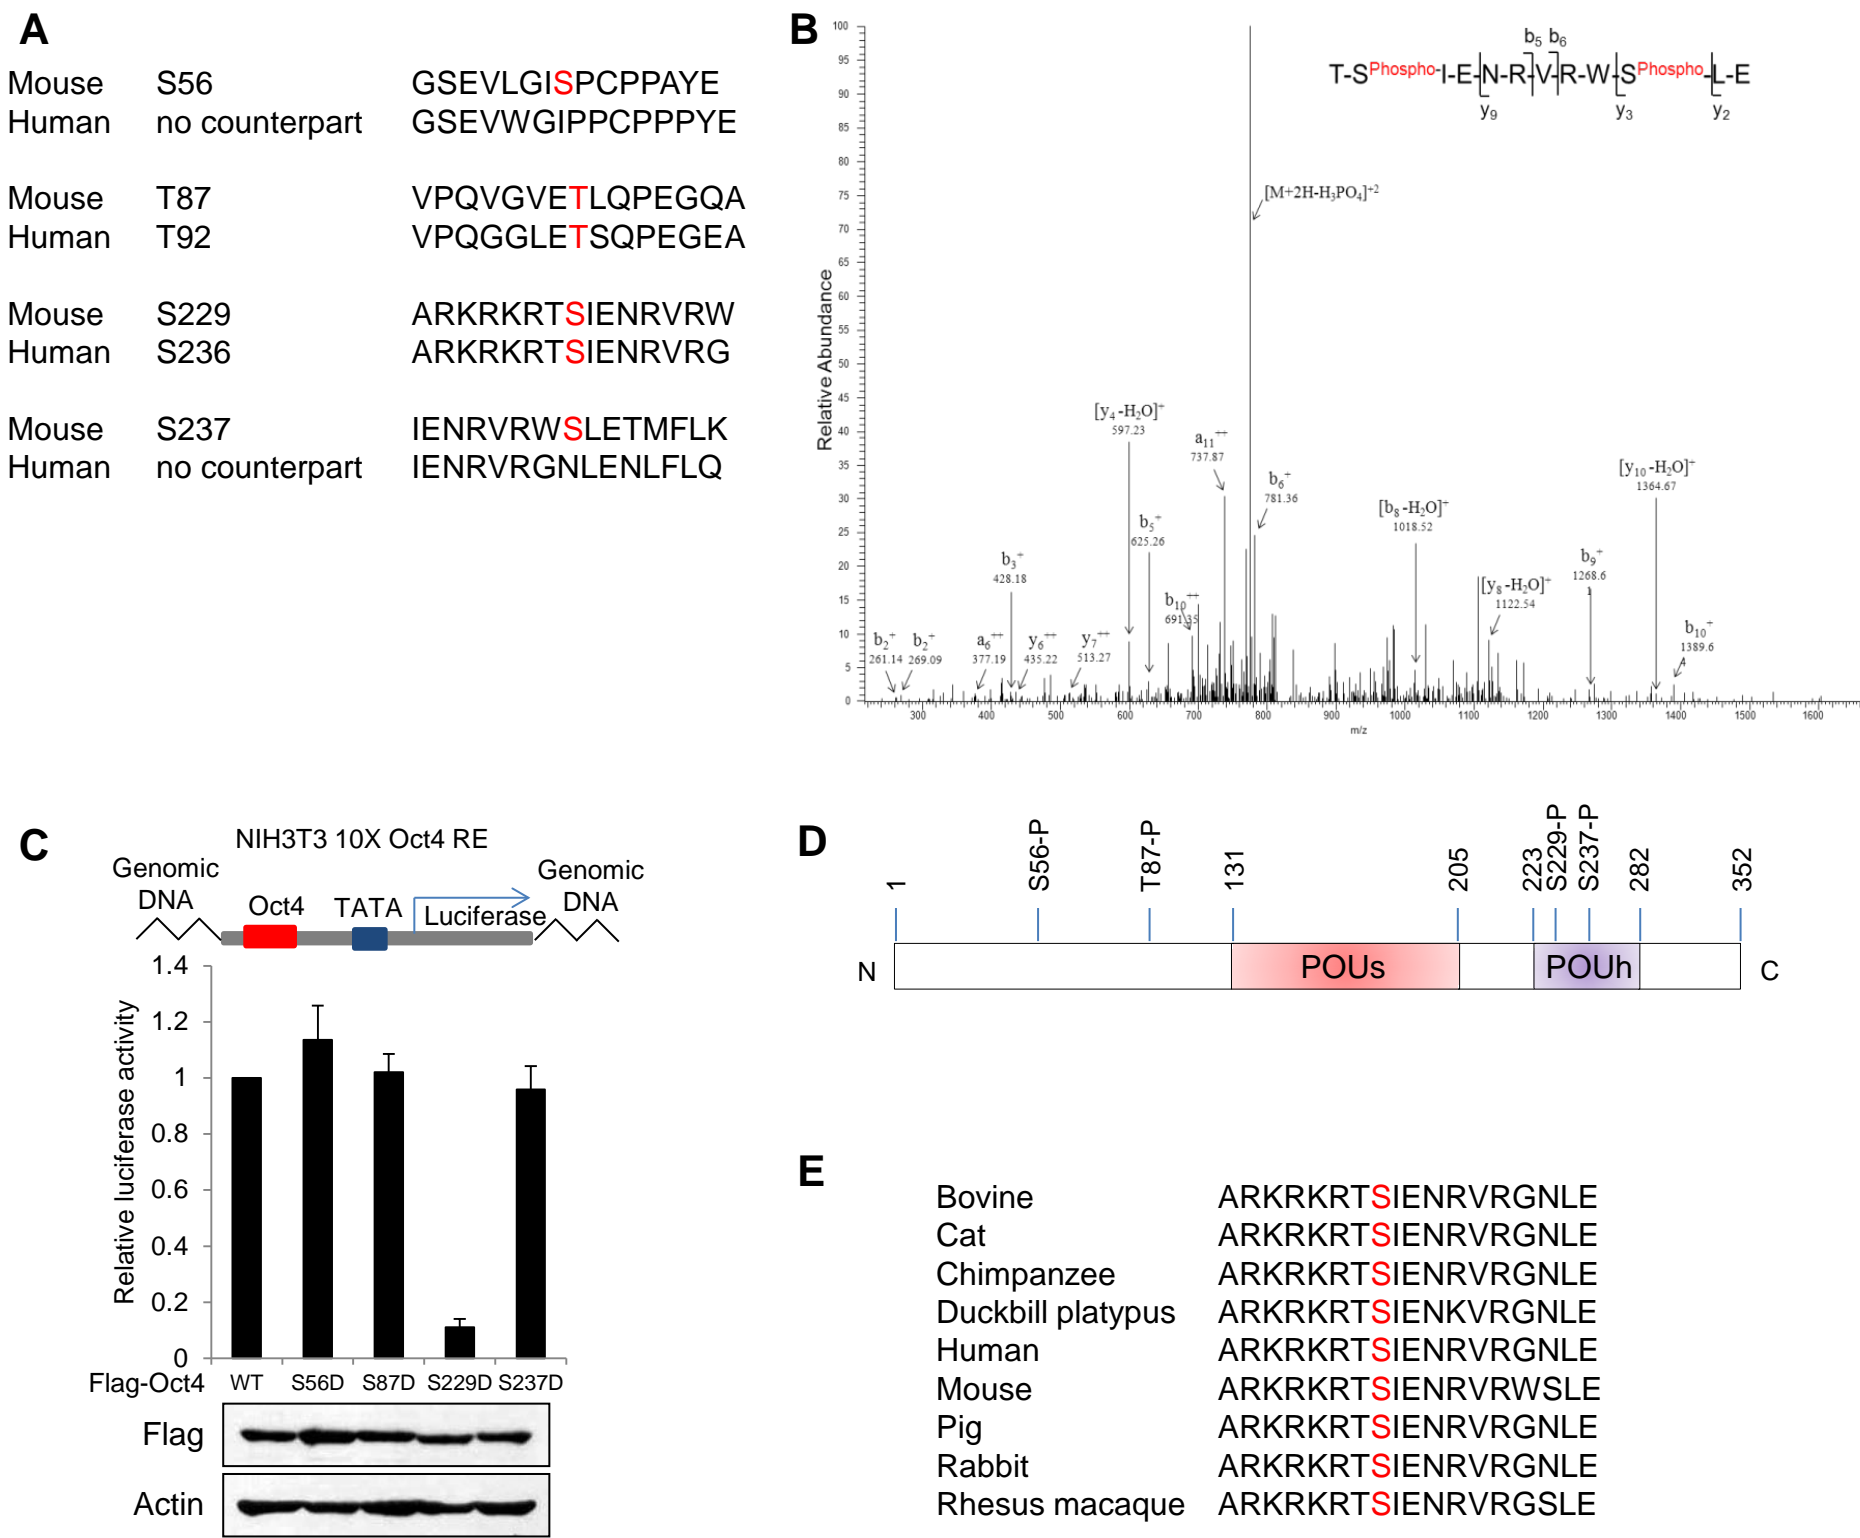

Supplement: supp [file elife-10877-supp-v1.zip]
